# Supplementary material for: Differentially Expressed Genes Related to Isoflavone Biosynthesis in a Soybean Mutant Revealed by a Comparative Transcriptomic Analysis
Source: Plants (Basel). 2024 Feb 21;13(5):584. doi: 10.3390/plants13050584 (PMC10934856; doi:10.3390/plants13050584)
Supplement: Supplementary file 1 [file plants-13-00584-s001.zip › Supplementary Tables.xlsx]

## Sheet: Table S1
Table S1. Individual and total isoflavone contents in different seed developmental stages
	DZE	GLE	GNE	DZI	GLI	GNI	MDZI	MGLI	MGNI	ADZI	AGLI	AGNI	Total
Danbaek_R5	nd	nd	6.03±2.02b	10.57±1.4c	53.52±1.86b	24.26±0.43b	99.18±1.91d	141.63±1.58b	60.36±0.67d	61.08±1.91c	45.66±1.85a	6.01±0.15b	508.3±6.53b
Danbaek_R6	9.71±0.14a	nd	16.15±4.6a	33.9±1.14b	9.48±0.09c	32.52±1.28b	261.31±2.14c	39.38±4.14c	115.98±0.36c	61.12±2.01c	15.33±0.86d	27.02±0.82a	621.9±7.11b
Danbaek_R6.5	2.35±0.13b	1.8±0.14a	2.15±0.86b	58.9±0.87a	86.34±5.11a	113.03±2.43a	349.39±8.71a	209.88±9.54a	595.41±40.45a	88.56±2.62a	nd	5.01±0.19c	1512.82±71.04a
Danbaek_R7	1.15±0.15c	1.56±0.11b	2.54±1.67b	63.04±5.94a	97.72±12.44a	110.7±6.78a	348.63±22.43a	227.36±23.81a	546.65±5.73b	70.54±3.67b	36.54±0.68b	2.52±0.27d	1508.95±82.45a
Danbaek_R8	2.42±0.23b	1.84±0.1a	2.78±0.47b	56.96±8.11a	90.03±10.98a	111.92±9.42a	303.28±25.09b	201.73±22.44a	530.29±33.54b	65.82±5.5bc	33.71±2.6c	2.56±0.29d	1403.34±114.95a
HG_R5	nd	nd	7.3±2.12b	19.1±0.29e	4.18±0.22c	18.32±1.96e	36.05±1.67e	5.8±0.32d	8.4±0.45e	21.53±1.27e	4.13±0.4b	63.86±3.32a	188.68±10.64e
HG_R6	0.27±0.15c	0.71±0.03b	4.2±0.62c	32.61±2.19d	41.03±2.03b	73.4±1.73d	219.77±6.5d	112.23±4.27bc	292.37±8.48d	61.83±2.92d	32.21±0.48a	7.19±0.27b	877.82±27.65d
HG_R6.5	2.1±0.11b	nd	4.42±0.56c	75.48±7.54b	44.46±5.43b	258.4±22.39b	429.15±43.93b	117.66±8.11b	1250.1±104.74b	133.92±9.86b	32.09±1.74a	nd	2347.78±201.74b
HG_R7	nd	nd	3.29±0.49c	55.63±1.48c	42.7±1.33b	166.86±6.37c	329.45±5.05c	105.59±4.72c	910.73±9.63c	97.67±3.11c	nd	nd	1711.93±30.74c
HG_R8	3.29±0.22a	1.98±0.06a	11.89±0.29a	104.8±4.71a	62.13±1.3a	334.8±11.22a	500.02±18.08a	134.33±2.18a	1522.75±25.35a	153.69±2.99a	nd	2±0.14c	2831.68±56.64a
DB088_R5	ndc	8.68±0.48a	4.69±2.54c	32.37±5.08b	17.05±15.16d	31.95±1.2d	42.23±2.25e	5.54±0.19c	42.77±1.18d	41.57±0.25d	25.77±1.46b	79.17±2.36a	331.8±26.17d
DB088_R6	0.57±0.1c	3.06±0.29c	1.85±0.31b	59.31±2.13b	37.15±1.03c	111.46±3.54c	337.32±6.43d	104.18±3.6b	604.75±12.17c	124.32±4.4c	114.93±7.07a	12.86±0.41b	1511.75±37.93c
DB088_R6.5	4.42±0.08b	4.24±0.08b	6.54±0.15b	417.87±5.47a	84.68±1.49b	765.68±12.66a	1932.23±13.43a	250.9±8.06a	3488.83±83.61a	360.21±8.09a	nd	6.29±0.05c	7321.88±83.26a
DB088_R7	4.52±0.3b	3.04±0.23c	4.41±0.14b	394.93±23.4a	78.8±6.39b	626.78±37.29b	1774.29±81.38b	243.25±18.93a	3015.42±167.93b	314.14±17.29b	nd	3.01±0.26d	6462.59±340.46b
DB088_R8	13.77±0.89a	4.24±0.16b	25.62±1.71a	419.49±27.34a	102.69±11.33a	785.59±41.16a	1594.01±128.27c	257.83±19.99a	3241.69±223.21b	330.07±26.3b	nd	3.34±0.06d	6778.34±471.45b
DZE, daidzein; GLE, glycitein; GNE, Genistein; DZI, daidzin; GLI, glycitin; GNI, genistin; MDZI, malonyl daidzin; MGLI, malonyl glycitin; MGNI, malonyl genistin; ADGI, acetyl daidzin; AGLI, acetyl glycitin; AGNI, acetyl genistin; TI, total isoflavone. The letters adjacent to number indicate the result of Fisher's LSD test at the 5% level (n=3) and nd means no data.

## Sheet: Table S2
Table S2. Information regarding the levels of differentially expressed genes
	Normalization									Log2FoldChange			Annotation
Gene id	Danbaek_2	Danbaek_7	Danbaek_10	DB088_1	DB088_2	DB088_4	Hwangkeum_2	Hwangkeum_3	Hwangkeum_5	DB088_vs_Hwangkeum	DB088_vs_Danbaek	Hwangguem_vs_Danbaek	Pfam	Panther	KOG	ec	KO	GO	Best-hit-arabi-name	Best-hit-arabi-symbol	Best-hit-arabi-defline
Glyma.03G206700.1	4.05771	7.65892	3.5429	2.30951	3.17312	4.25944	3.97014	2.79092	3.58681	-0.0870361	-0.647412	-0.560376
Glyma.10G229700.1	11.1587	1.91473	5.31436	3.46426	9.51935	11.7135	3.97014	12.094	7.17363	0.0878681	0.425591	0.337723							AT5G52870.1
Glyma.U045500.1	15.2164	43.0814	26.5718	61.202	83.5587	121.394	48.6343	42.7941	65.4594	0.762532	1.64894	0.886413		PTHR12549					AT1G68890.1		magnesium ion binding;thiamin pyrophosphate binding;hydro-lyases;catalytics;2-succinyl-5-enolpyruvyl-6-hydroxy-3-cyclohexene-1-carboxylic-acid synthases
Glyma.07G002000.1	23.3319	22.0194	16.8288	6.92853	4.23082	12.7783	15.8806	9.30307	16.1407	-0.787709	-1.37717	-0.589461	PF07891	PTHR10759,PTHR10759:SF1					AT3G20260.1		Protein of unknown function (DUF1666)
Glyma.13G282700.1	180.568	274.764	272.804	262.129	312.023	258.761	249.127	260.486	248.387	0.135969	0.193959	0.0579897	PF02475	PTHR23245:SF25,PTHR23245	KOG2078			GO:0003723,GO:0004809,GO:0008033,GO:0016740,GO:0008276,GO:0006479,GO:0005737	AT4G27340.1		Met-10+ like family protein
Glyma.15G018900.1	66.9523	84.2481	70.8581	72.7496	76.1548	93.7076	85.3581	93.961	82.4967	-0.109902	0.127711	0.237613	PF05172	PTHR21527:SF2,PTHR21527	KOG4285		K14313		AT3G16310.1		mitotic phosphoprotein N\' end (MPPN) family protein
Glyma.10G001600.1	105.501	81.376	72.6295	71.5948	63.4623	60.697	46.6492	53.0275	61.8726	0.277068	-0.406726	-0.683794	PF04446	PTHR12729	KOG2721	2.7.7.-	K10761	GO:0000287,GO:0008193,GO:0006400	AT2G32320.1		tRNAHis guanylyltransferase
Glyma.03G153900.1	100.428	72.7597	75.2867	26.5594	23.2695	25.5566	80.3954	46.5154	62.7693	-1.33121	-1.72074	-0.389532	PF01926	PTHR11089:SF38,PTHR11089				GO:0005525,GO:0015093,GO:0015684,GO:0016021	AT4G02790.1		GTP-binding family protein
Glyma.03G043200.1	191.727	348.481	355.176	114.321	114.232	124.589	323.567	273.51	428.624	-1.53829	-1.34226	0.196033	PF00931	PTHR23155,PTHR23155:SF121	KOG4658			GO:0043531	AT3G14460.1		LRR and NB-ARC domains-containing disease resistance protein
Glyma.20G177700.1	544.748	447.089	437.549	409.938	310.965	370.571	712.641	811.228	642.04	-0.988694	-0.389118	0.599577	PF05873	PTHR12700,PTHR12700:SF9	KOG3366	3.6.3.14	K02138	GO:0015078,GO:0015986,GO:0000276	AT3G52300.1	ATPQ	ATP synthase D chain, mitochondrial
Glyma.20G164000.1	1.01443	2.87209	0.885726	1.15475	2.11541	1.06486	0.992536	0.930307	0.896704	0.620577	-0.138629	-0.759206							AT5G52900.1
Glyma.17G258300.1	56.808	57.4419	59.3436	36.9522	39.1351	144.821	9.92536	15.8152	20.6242	2.25235	0.347733	-1.90461	PF00091,PF03953	PTHR11588	KOG1375		K07375	GO:0003924,GO:0005525,GO:0006184,GO:0051258,GO:0043234	AT1G75780.1	TUB1	tubulin beta-1 chain
Glyma.12G104200.1	2.02886	3.82946	0.885726	9.23804	4.23082	3.19458	10.9179	2.79092	2.69011	0.0230846	1.305	1.28192
Glyma.16G145700.1	229.261	134.031	159.431	98.1542	94.1358	124.589	147.888	173.037	146.163	-0.559764	-0.722116	-0.162352	PF08551	PTHR13377	KOG2890			GO:0004252,GO:0016021	AT3G07950.1		rhomboid protein-related
Glyma.17G052000.1	153.179	176.155	226.746	308.32	405.101	351.404	256.074	243.741	270.805	0.466525	0.937252	0.470727	PF00291	PTHR10314,PTHR10314:SF1	KOG1395				AT4G29840.1	MTO2,TS	Pyridoxal-5\'-phosphate-dependent enzyme family protein
Glyma.14G060200.1	1425.27	1255.11	1245.33	1207.87	1483.96	1291.67	1612.87	1352.67	1421.28	-0.139134	0.0210867	0.16022	PF00169	PTHR22903				GO:0005515,GO:0005543	AT5G05710.1		Pleckstrin homology (PH) domain superfamily protein
Glyma.03G054900.1	1.01443	0.957365	1.77145	1.15475	1.05771	1.06486	22.8283	23.2577	29.5912	-4.52927	-0.191773	4.3375	PF00954,PF07714,PF08276,PF01453	PTHR24420:SF432,PTHR24420	KOG1187			GO:0004672,GO:0005524,GO:0006468,GO:0048544	AT4G27290.1		S-locus lectin protein kinase family protein
Glyma.03G207200.1	68.9812	86.1628	68.2009	98.1542	104.713	94.7725	52.6044	41.8638	75.3231	0.809803	0.414293	-0.39551	PF11955						AT3G58520.1		Ubiquitin carboxyl-terminal hydrolase family protein
Glyma.07G003100.1	2.02886	0.957365	1.77145	2.30951	6.34623	3.19458	1.98507	0.930307	4.48352	0.679544	1.3166	0.637054
Glyma.04G053600.1	5.07214	6.70155	4.42863	6.92853	5.28853	2.12972	7.94029	6.51215	5.38022	-0.467152	-0.175475	0.291677	PF07516					GO:0017038,GO:0016020	AT4G01800.2	AGY1,AtcpSecA	Albino or Glassy Yellow 1
Glyma.01G062100.1	45.6493	67.9729	32.7719	84.2971	78.2702	81.9942	122.082	103.264	119.262	-0.494758	0.74034	1.2351	PF00294	PTHR10584,PTHR10584:SF34	KOG2855				AT1G69200.1	FLN2	fructokinase-like 2
Glyma.14G090400.1	12.1731	3.82946	6.20008	1.15475	1.05771	4.25944	11.9104	5.58184	1.79341	-1.57527	-1.77847	-0.203204	PF01946,PF08491	PTHR10835	KOG1298	1.14.99.7	K00511	GO:0004506,GO:0050660,GO:0055114,GO:0016021	AT1G58440.1	SQE1,XF1	FAD/NAD(P)-binding oxidoreductase family protein
Glyma.04G147000.1	40.5771	63.1861	68.2009	65.821	83.5587	72.4104	41.6865	35.3517	47.5253	0.832314	0.367088	-0.465226		PTHR23125,PTHR23125:SF106	KOG1947				AT2G25490.1	EBF1,FBL6	EIN3-binding F box protein 1
Glyma.15G060400.1	66.9523	44.0388	43.4006	146.654	116.348	150.145	24.8134	38.1426	52.0088	1.84546	1.42006	-0.425402							AT2G32210.1
Glyma.16G178900.1	62.8946	60.314	49.6007	92.3804	62.4046	101.162	36.7238	52.0972	54.6989	0.834592	0.566663	-0.267929	PF05096						AT4G25720.1	ATQC,QC,QCT	glutaminyl cyclase
Glyma.08G333100.1	184.626	112.969	83.2582	45.0354	45.4813	43.6592	45.6567	72.564	62.7693	-0.431782	-1.50511	-1.07333	PF04178	PTHR23137	KOG2887			GO:0016192	AT4G26550.1		Got1/Sft2-like vescicle transport protein family
Glyma.03G006100.1	2.02886	3.82946	2.65718	1.15475	2.11541	1.06486	1.98507	2.79092	0.896704	-0.387995	-0.97405	-0.586055							AT5G14450.1		GDSL-like Lipase/Acylhydrolase superfamily protein
Glyma.04G218800.1	85.212	126.372	133.745	110.856	165.002	151.21	123.074	120.01	145.266	0.13711	0.306497	0.169387	PF04194	PTHR12298:SF3,PTHR12298	KOG2061			GO:0005737	AT5G64830.1		programmed cell death 2 C-terminal domain-containing protein
Glyma.13G188400.1	61.8802	34.4651	45.172	90.0709	95.1935	103.291	93.2984	90.2398	65.4594	0.212718	1.02787	0.815153	PF05018	PTHR12458					AT3G12300.1
Glyma.08G355900.1	11.1587	12.4457	15.0573	65.821	21.1541	38.3349	8.93282	12.094	22.4176	1.52826	1.69652	0.168262		PTHR23083,PTHR23083:SF200				GO:0005515	AT5G48850.1	ATSDI1	Tetratricopeptide repeat (TPR)-like superfamily protein
Glyma.08G111200.1	205.929	180.942	201.06	239.034	262.311	195.934	160.791	151.64	187.411	0.480265	0.24609	-0.234174	PF00432	PTHR11774:SF5,PTHR11774	KOG0366	2.5.1.60	K05956	GO:0003824	AT5G12210.1	AtRGTB1,RGTB1	RAB geranylgeranyl transferase beta subunit 1
Glyma.01G151700.1	2.02886	5.74419	3.5429	4.61902	6.34623	1.06486	3.97014	3.72123	10.7604	-0.617113	0.0882924	0.705405	PF00097	PTHR14155				GO:0046872,GO:0008270,GO:0005515	AT5G45290.1		RING/U-box superfamily protein
Glyma.17G048900.1	23.3319	36.3799	31.0004	91.2256	81.4433	70.2807	35.7313	36.282	16.1407	1.46256	1.42129	-0.0412704	PF07714	PTHR24420:SF685,PTHR24420	KOG1187			GO:0004672,GO:0005524,GO:0006468	AT2G05940.1		Protein kinase superfamily protein
Glyma.11G141500.1	463.594	502.616	510.178	592.389	590.2	590.997	685.842	526.554	653.697	-0.073352	0.264597	0.337949	PF00076	PTHR19965	KOG0533		K12881	GO:0003676	AT5G59950.5		RNA-binding (RRM/RBD/RNP motifs) family protein
Glyma.04G144300.1	43.6204	67.9729	46.9435	54.2735	68.7509	80.9293	116.127	133.034	137.196	-0.921691	0.363423	1.28511	PF00113,PF03952	PTHR11902	KOG2670	4.2.1.11	K01689	GO:0000287,GO:0004634,GO:0006096,GO:0000015	AT1G74030.1	ENO1	enolase 1
Glyma.14G133500.1	1.01443	7.65892	1.77145	3.46426	5.28853	3.19458	3.97014	1.86061	3.58681	0.343266	0.193908	-0.149357							AT5G53860.5	emb2737,EMB64	embryo defective 2737
Glyma.10G159800.1	133.905	116.798	100.087	49.6545	50.7699	55.3727	97.2685	123.731	113.881	-1.10398	-1.17094	-0.0669607	PF00291	PTHR10314,PTHR10314:SF8	KOG1252	2.5.1.47	K01738		AT3G04940.1	ATCYSD1,CYSD1	cysteine synthase D1
Glyma.04G247700.1	698.941	769.721	643.923	583.151	652.604	576.089	715.618	650.285	646.523	-0.151477	-0.221551	-0.0700736	PF00490	PTHR11458	KOG2794	4.2.1.24	K01698	GO:0004655,GO:0046872,GO:0033014	AT1G69740.1	HEMB1	Aldolase superfamily protein
Glyma.14G103600.1	41.5916	5.74419	20.3717	24.2499	9.51935	13.8432	12.903	15.8152	8.07033	0.372081	-0.507978	-0.880059	PF00400	PTHR19879				GO:0005515	AT5G25150.1	TAF5	TBP-associated factor 5
Glyma.13G094700.1	75.0677	67.9729	67.3152	72.7496	65.5777	77.7347	48.6343	37.2123	29.5912	0.90433	0.0386139	-0.865716	PF00202	PTHR11986:SF4,PTHR11986	KOG1401	2.6.1.62	K00833	GO:0008483,GO:0030170	AT5G57590.1	BIO1	adenosylmethionine-8-amino-7-oxononanoate transaminases
Glyma.11G026300.1	1.01443	0.957365	0.885726	4.61902	4.23082	5.3243	1.98507	3.72123	4.48352	0.476132	2.31043	1.83429	PF01554	PTHR11206:SF38,PTHR11206	KOG1347			GO:0015238,GO:0015297,GO:0006855,GO:0055085,GO:0016020	AT4G23030.1		MATE efflux family protein
Glyma.04G056400.1	180.568	164.667	197.517	191.689	173.464	191.675	117.119	105.125	144.369	0.602972	0.0369379	-0.566034	PF00612,PF00063,PF01843,PF02736	PTHR13140,PTHR13140:SF36	KOG0160			GO:0003774,GO:0005524,GO:0016459,GO:0005515	AT4G33200.1	ATXI-I,XI-15,XI-I	myosin, putative
Glyma.08G350100.1	3.04329	1.91473	3.5429	1.15475	4.23082	2.12972	7.94029	13.9546	3.58681	-1.76156	-0.177789	1.58377
Glyma.10G100400.1	96.3707	157.008	167.402	148.963	142.79	167.183	206.447	256.765	245.697	-0.627306	0.125226	0.752532	PF00023,PF00642	PTHR14493,PTHR14493:SF22	KOG1595			GO:0005515,GO:0046872	AT2G41900.1		CCCH-type zinc finger protein with ARM repeat domain
Glyma.11G038200.1	5.07214	5.74419	5.31436	5.77377	2.11541	2.12972	3.97014	2.79092	0.896704	0.387729	-0.687083	-1.07481
Glyma.10G246400.1	185.64	285.295	131.087	337.188	569.046	316.263	176.671	160.943	110.295	1.44855	1.02194	-0.426612							AT3G22640.1	PAP85	cupin family protein
Glyma.13G000200.1	3.04329	2.87209	6.20008	19.6308	25.3849	25.5566	53.5969	66.9821	88.7737	-1.56876	2.54225	4.11101	PF09334	PTHR11946,PTHR11946:SF20	KOG1247			GO:0000166,GO:0004812,GO:0005524,GO:0006418	AT4G13780.1		methionine--tRNA ligase, putative / methionyl-tRNA synthetase, putative / MetRS, putative
Glyma.16G164400.1	1.01443	2.87209	1.77145	1.15475	1.05771	1.06486	9.92536	8.37277	8.07033	-3.00822	-0.787769	2.22046	PF00141					GO:0004601,GO:0020037,GO:0006979,GO:0055114	AT1G71695.1		Peroxidase superfamily protein
Glyma.13G128300.1	1.01443	0.957365	0.885726	1.15475	2.11541	3.19458	4.96268	5.58184	1.79341	-0.932435	1.17783	2.11027	PF00294	PTHR10584,PTHR10584:SF21	KOG2855				AT4G28706.4		pfkB-like carbohydrate kinase family protein
Glyma.01G144500.1	5.07214	13.4031	11.5144	15.0118	9.51935	7.45401	6.94775	7.44246	4.48352	0.761024	0.0929369	-0.668087	PF00225,PF00514	PTHR24115:SF69,PTHR24115	KOG0240			GO:0003777,GO:0005524,GO:0008017,GO:0007018,GO:0005515	AT1G01950.1	ARK2	armadillo repeat kinesin 2
Glyma.13G095200.1	6.08657	10.531	7.08581	11.5475	5.28853	8.51887	6.94775	5.58184	3.58681	0.653737	0.0971738	-0.556563	PF00722,PF06955	PTHR10963,PTHR10963:SF14		2.4.1.207	K08235	GO:0004553,GO:0005975,GO:0016762,GO:0006073,GO:0005618,GO:0048046	AT4G25810.1	XTH23,XTR6	xyloglucan endotransglycosylase 6
Glyma.15G094900.1	15.2164	16.2752	25.6861	10.3928	10.5771	19.1675	16.8731	18.6061	17.9341	-0.412256	-0.510508	-0.0982524	PF00953	PTHR22926:SF3,PTHR22926				GO:0008963,GO:0016021	AT4G18270.1	ATTRANS11,TRANS11	translocase 11
Glyma.08G009400.1	1.01443	1.91473	0.885726	1.15475	1.05771	1.06486	0.992536	0.930307	0.896704	0.217053	-0.219123	-0.436176	PF00069	PTHR24056,PTHR24056:SF77	KOG0600			GO:0004672,GO:0005524,GO:0006468	AT5G50860.1		Protein kinase superfamily protein
Glyma.08G168200.1	268.824	206.791	204.603	196.308	199.906	185.285	341.432	415.847	416.967	-1.01388	-0.226216	0.787669	PF00240	PTHR10666	KOG0005			GO:0005515	AT1G31340.1	ATRUB1,NEDD8,RUB1	related to ubiquitin 1
Glyma.02G243900.1	1.01443	10.531	0.885726	1.15475	2.11541	1.06486	0.992536	0.930307	1.79341	0.222193	-1.51985	-1.74204	PF03951,PF00120	PTHR20852:SF14,PTHR20852				GO:0004356,GO:0006807,GO:0006542	AT5G37600.1	ATGLN1;1,ATGSR1,GLN1;1,GSR 1	glutamine synthase clone R1
Glyma.06G001000.1	3.04329	2.87209	2.65718	1.15475	1.05771	2.12972	1.98507	3.72123	0.896704	-0.604704	-0.981307	-0.376603	PF05368	PTHR14194:SF21,PTHR14194	KOG1203				AT4G35250.1		NAD(P)-binding Rossmann-fold superfamily protein
Glyma.10G247500.1	30815.3	23306.1	22380.5	55241.2	49380	43809.4	40756.5	32180.3	37529.7	0.426179	0.956221	0.530041	PF04927						AT3G22490.1		Seed maturation protein
Glyma.03G109700.1	8.11543	15.3178	5.31436	13.8571	3.17312	7.45401	4.96268	3.72123	5.38022	0.79983	-0.231592	-1.03142							AT3G06530.1		ARM repeat superfamily protein
Glyma.13G007100.1	2.02886	1.91473	2.65718	81.9876	66.6355	63.8915	69.4775	61.4003	75.3231	0.0435112	5.00878	4.96527
Glyma.02G175400.1	28.404	30.6357	24.8003	27.7141	31.7312	25.5566	25.8059	26.0486	16.1407	0.322062	0.0198563	-0.302206	PF03311	PTHR12290,PTHR12290:SF5	KOG2729			GO:0035556,GO:0016020	AT3G12180.1		Cornichon family protein
Glyma.08G283700.1	672.566	1058.85	1000.87	1364.92	1318.96	1554.69	861.521	800.064	795.376	0.786703	0.633472	-0.153231	PF01326	PTHR22931,PTHR22931:SF1		2.7.9.4	K08244	GO:0005524,GO:0016301,GO:0016310	AT1G10760.1	GWD,GWD1,SEX1,SOP,SOP1	Pyruvate phosphate dikinase, PEP/pyruvate binding domain
Glyma.08G080900.1	151.15	202.961	211.689	114.321	129.04	110.745	116.127	127.452	112.985	-0.00997699	-0.67611	-0.666133	PF01565,PF08031	PTHR11748,PTHR11748:SF29	KOG4730			GO:0008762,GO:0016491,GO:0050660,GO:0055114	AT1G30760.1		FAD-binding Berberine family protein
Glyma.03G211500.1	105.501	122.543	126.659	169.749	187.214	214.037	119.104	99.5429	130.022	0.711631	0.686882	-0.0247488	PF00046	PTHR12506:SF12,PTHR12506				GO:0003700,GO:0043565,GO:0006355	AT4G02560.1	LD	Homeodomain-like superfamily protein
Glyma.18G147100.1	259.694	317.845	258.632	404.164	428.371	429.138	281.88	267.929	300.396	0.569457	0.593469	0.0240121	PF10273	PTHR21250	KOG4032				AT5G27990.1		Pre-rRNA-processing protein TSR2, conserved region
Glyma.14G100200.1	14.202	21.062	12.4002	17.3213	25.3849	27.6863	26.7985	32.5608	23.3143	-0.232002	0.562518	0.79452							AT5G20610.1
Glyma.08G123400.1	8.11543	9.57365	13.2859	16.1666	21.1541	20.2323	25.8059	9.30307	27.7978	-0.128325	0.893788	1.02211	PF03004
Glyma.15G170100.1	2.02886	8.61628	3.5429	15.0118	11.6348	13.8432	3.97014	5.58184	2.69011	1.72571	1.51288	-0.212825	PF05553						AT5G56980.1
Glyma.18G011200.1	151.15	147.434	151.459	100.464	106.828	188.48	134.985	133.964	143.473	-0.0594508	-0.185394	-0.125943			KOG4593				AT1G24460.1
Glyma.09G140500.1	105.501	92.8644	64.658	38.1069	68.7509	57.5024	142.925	195.365	145.266	-1.55682	-0.678328	0.878493							AT5G52230.1	MBD13	methyl-CPG-binding domain protein 13
Glyma.12G045800.1	251.578	210.62	190.431	158.201	207.31	191.675	244.164	215.831	288.739	-0.426293	-0.228105	0.198188	PF00400,PF08324,PF09070	PTHR19849	KOG0301		K14018	GO:0005515	AT3G18860.1		transducin family protein / WD-40 repeat family protein
Glyma.05G220200.1	1049.93	1362.33	1219.64	943.435	874.723	802.904	1592.03	1441.05	1737.81	-0.864106	-0.470577	0.393529	PF07714	PTHR23257:SF82,PTHR23257	KOG0192			GO:0004672,GO:0005524,GO:0006468	AT4G31170.1		Protein kinase superfamily protein
Glyma.10G002600.1	856.178	707.493	681.123	923.804	708.663	664.472	934.969	850.301	861.732	-0.204647	0.0331295	0.237776	PF00830					GO:0003735,GO:0006412,GO:0005622,GO:0005840	AT2G33450.1		Ribosomal L28 family
Glyma.11G038700.1	39.5627	48.8256	31.8861	31.1784	31.7312	35.1404	43.6716	35.3517	51.1121	-0.408425	-0.294742	0.113683	PF00160		KOG0884			GO:0003755,GO:0006457	AT4G17070.1		peptidyl-prolyl cis-trans isomerases
Glyma.05G162500.1	1.01443	0.957365	0.885726	1.15475	2.11541	4.25944	0.992536	0.930307	0.896704	1.41711	1.39781	-0.0193	PF00230	PTHR19139:SF22,PTHR19139	KOG0223			GO:0005215,GO:0006810,GO:0016020	AT4G18910.1	ATNLM2,NIP1;2,NLM2	NOD26-like intrinsic protein 1;2
Glyma.01G055300.1	286.069	287.209	294.947	254.046	223.176	263.02	221.336	225.134	251.077	0.085707	-0.230072	-0.315779	PF01661	PTHR11106,PTHR11106:SF4	KOG2633				AT1G69340.1		appr-1-p processing enzyme family protein
Glyma.12G201500.1	76.0822	116.798	103.63	99.3089	60.2892	90.513	77.4178	109.776	82.4967	-0.108737	-0.245514	-0.136777	PF01501	PTHR13778,PTHR13778:SF2		2.4.1.43	K13648	GO:0016757	AT2G20810.1	GAUT10,LGT4	galacturonosyltransferase 10
Glyma.14G135400.1	6.08657	4.78682	1.77145	1.15475	3.17312	7.45401	5.95522	5.58184	6.27693	-0.59644	-0.101979	0.494461	PF03106,PF10533					GO:0003700,GO:0043565,GO:0006355	AT4G31550.1	ATWRKY11,WRKY11	WRKY DNA-binding protein 11
Glyma.06G232400.1	20.2886	32.5504	35.429	75.0591	48.6545	52.1781	26.7985	34.4214	13.4506	1.23608	0.994724	-0.241354		PTHR10699:SF9,PTHR10699					AT3G15050.1	IQD10	IQ-domain 10
Glyma.07G023100.1	9.12986	6.70155	12.4002	9.23804	12.6925	8.51887	4.96268	1.86061	7.17363	1.1213	0.109103	-1.0122	PF03352					GO:0008725,GO:0006284	AT5G57970.1		DNA glycosylase superfamily protein
Glyma.13G148700.1	14.202	9.57365	10.6287	4.61902	5.28853	2.12972	3.97014	1.86061	3.58681	0.35408	-1.51508	-1.86916	PF03016	PTHR11062:SF1,PTHR11062	KOG1021				AT5G03795.1		Exostosin family protein
Glyma.16G037700.1	1182.82	1428.39	1516.36	1627.05	1387.71	1320.43	1246.63	1055.9	1085.91	0.355476	0.070799	-0.284677	PF00400	PTHR22847:SF132,PTHR22847	KOG0265		K12857	GO:0005515	AT2G43770.1		Transducin/WD40 repeat-like superfamily protein
Glyma.02G103500.1	8.11543	7.65892	2.65718	1.15475	2.11541	5.3243	5.95522	11.1637	7.17363	-1.49903	-1.1007	0.398337	PF01596	PTHR10509	KOG1663	2.1.1.104	K00588	GO:0008171	AT4G34050.1	CCoAOMT1	S-adenosyl-L-methionine-dependent methyltransferases superfamily protein
Glyma.08G002300.1	147.092	131.159	83.2582	226.332	264.426	329.041	175.679	167.455	119.262	0.826143	1.18124	0.355095	PF00226	PTHR23172:SF31,PTHR23172	KOG0431				AT4G12770.1		Chaperone DnaJ-domain superfamily protein
Glyma.06G167000.1	442.291	299.655	359.605	93.5351	98.3666	90.513	196.522	275.371	195.481	-1.24068	-1.96365	-0.722968	PF03083	PTHR10791	KOG1623			GO:0016021	AT5G50790.1		Nodulin MtN3 family protein
Glyma.17G098100.1	3.04329	6.70155	7.97153	2.30951	5.28853	5.3243	3.97014	3.72123	2.69011	0.315854	-0.455217	-0.771071							AT5G62550.1
Glyma.05G183600.1	1.01443	0.957365	0.885726	1.15475	6.34623	1.06486	14.888	3.72123	14.3473	-1.9439	1.58383	3.52773							AT2G21960.1
Glyma.16G085200.1	1.01443	0.957365	0.885726	2.30951	1.05771	2.12972	2.97761	3.72123	2.69011	-0.772337	0.943864	1.7162	PF00931	PTHR11017,PTHR11017:SF130	KOG0617			GO:0043531	AT5G36930.2		Disease resistance protein (TIR-NBS-LRR class) family
Glyma.03G135000.1	53.7647	39.252	48.7149	81.9876	58.1738	42.5944	28.7835	54.8881	38.5583	0.580319	0.366755	-0.213564	PF01926	PTHR11089:SF4,PTHR11089	KOG2485			GO:0005525	AT2G41670.1		P-loop containing nucleoside triphosphate hydrolases superfamily protein
Glyma.17G032700.1	50816.8	45022.9	44560	75004.8	67486.9	61866.2	66800.6	59053.1	66142.7	0.0900185	0.541558	0.451539	PF03070	PTHR25987,PTHR25987:SF4					AT3G16990.1		Haem oxygenase-like, multi-helical
Glyma.07G065400.1	5.07214	8.61628	2.65718	1.15475	2.11541	1.06486	2.97761	5.58184	2.69011	-1.37576	-1.91479	-0.539034	PF05056						AT3G09140.2		Protein of unknown function (DUF674)
Glyma.08G236800.1	83.1832	73.7171	80.6011	139.725	139.617	152.275	78.4103	89.3095	66.3561	0.882776	0.861817	-0.020959						GO:0000723	AT4G09680.1	ATCTC1,CTC1	conserved telomere maintenance component 1
Glyma.09G068800.1	785.168	682.601	807.782	696.317	693.855	720.91	586.589	480.969	568.51	0.36775	-0.108234	-0.475983	PF02141,PF03456	PTHR15288					AT5G35560.1		DENN (AEX-3) domain-containing protein
Glyma.13G214100.1	51.7359	30.6357	43.4006	5.77377	9.51935	12.7783	5.95522	31.6304	12.5539	-0.836845	-2.16364	-1.32679							AT3G54070.1		Ankyrin repeat family protein
Glyma.02G121000.1	12.1731	7.65892	12.4002	2.30951	7.40394	7.45401	9.92536	14.8849	6.27693	-0.856644	-0.908827	-0.0521831	PF03492					GO:0008168	AT4G36470.1		S-adenosyl-L-methionine-dependent methyltransferases superfamily protein
Glyma.20G238000.1	19.2741	11.4884	14.1716	23.0951	42.3082	33.0106	3.97014	13.0243	13.4506	1.69266	1.13105	-0.561607	PF00614	PTHR18896,PTHR18896:SF2		3.1.4.4	K01115	GO:0003824,GO:0008152	AT3G16785.1	PLD ZETA 1,PLDP1,PLDZ1,PLDZETA1	phospholipase D P1
Glyma.02G222400.1	6234.68	5761.42	6078.74	11270.4	6315.56	6938.62	1732.97	2091.33	1714.5	2.14658	0.440246	-1.70634	PF00274	PTHR11627	KOG1557	4.1.2.13	K01623	GO:0004332,GO:0006096	AT2G36460.1		Aldolase superfamily protein
Glyma.04G189200.1	173.467	171.368	134.63	146.654	158.656	145.886	151.858	186.061	189.204	-0.22439	-0.087676	0.136714	PF01974,PF02778	PTHR21227	KOG4685	3.1.27.9	K01170	GO:0000213,GO:0006388	AT3G45590.1	ATSEN1,SEN1	splicing endonuclease 1
Glyma.14G224300.1	43.6204	17.2326	27.4575	27.7141	59.2315	9.58373	30.7686	27.9092	31.3846	0.100042	0.128383	0.0283408	PF00134						AT2G01905.1	CYCJ18	cyclin J18
Glyma.08G081400.1	11046.1	7251.08	6988.38	12033.7	10547.4	10593.2	16502.9	15120.3	15665.4	-0.511424	0.391754	0.903178	PF00481	PTHR13832:SF144,PTHR13832	KOG0698			GO:0003824	AT2G34740.1		Protein phosphatase 2C family protein
Glyma.14G201900.1	549.82	220.194	263.061	127.023	159.714	139.497	265.007	310.723	243.007	-0.941756	-1.27723	-0.335474	PF02109	PTHR10705	KOG1746		K12668	GO:0004579,GO:0008250,GO:0016021	AT1G32210.1	ATDAD1	Defender against death (DAD family) protein
Glyma.15G066000.1	284.04	312.101	317.09	385.688	313.081	306.679	373.194	311.653	347.024	-0.0374233	0.138787	0.176211	PF04641	PTHR13063:SF3,PTHR13063	KOG3039		K13125	GO:0005515,GO:0008270	AT1G61620.1		phosphoinositide binding
Glyma.01G105400.1	14.202	3.82946	7.08581	21.9403	10.5771	8.51887	19.8507	4.65154	14.3473	0.0790031	0.70822	0.629217
Glyma.12G001700.1	285.054	425.07	360.491	239.034	184.041	232.139	276.918	263.277	291.429	-0.343963	-0.708401	-0.364438	PF00854	PTHR11654:SF37,PTHR11654	KOG1237			GO:0005215,GO:0006810,GO:0016020,GO:0055085,GO:0016021	AT1G22540.1		Major facilitator superfamily protein
Glyma.03G260100.1	8.11543	1.91473	4.42863	1.15475	2.11541	3.19458	4.96268	1.86061	2.69011	-0.557369	-1.16128	-0.603913
Glyma.19G041500.1	1.01443	0.957365	0.885726	4.61902	4.23082	1.06486	0.992536	3.72123	3.58681	0.256357	1.79481	1.53845							AT5G14620.1	DMT7,DRM2	domains rearranged methyltransferase 2
Glyma.08G365200.1	88.2553	107.225	77.9439	65.821	95.1935	89.4482	156.821	134.895	139.886	-0.785103	-0.126544	0.658558	PF00181	PTHR13691:SF2,PTHR13691				GO:0003735,GO:0006412,GO:0005622,GO:0005840	ATMG00560.1		Nucleic acid-binding, OB-fold-like protein
Glyma.10G185700.1	7.101	4.78682	3.5429	5.77377	9.51935	7.45401	11.9104	8.37277	10.7604	-0.448613	0.559879	1.00849							AT3G01680.1
Glyma.08G314400.1	277.953	209.663	252.432	321.022	254.907	251.307	242.179	227.925	225.969	0.249059	0.160679	-0.0883799	PF01190						AT5G54855.1		Pollen Ole e 1 allergen and extensin family protein
Glyma.16G103500.1	29.4184	20.1047	21.2574	5.77377	4.23082	3.19458	7.94029	24.188	8.07033	-1.6067	-2.4229	-0.816207	PF00385,PF00145	PTHR10629,PTHR10629:SF10		2.1.1.37	K00558	GO:0003677,GO:0008168,GO:0006306	AT4G19020.1	CMT2	chromomethylase 2
Glyma.15G275700.1	11.1587	1.91473	3.5429	4.61902	2.11541	3.19458	0.992536	0.930307	0.896704	1.81619	-0.742882	-2.55907							AT1G51400.1		Photosystem II 5 kD protein
Glyma.11G154500.1	6.08657	8.61628	8.85726	3.46426	11.6348	11.7135	12.903	6.51215	3.58681	0.221149	0.186558	-0.0345915	PF03871,PF01191	PTHR10535	KOG3218			GO:0003677,GO:0003899,GO:0006351,GO:0005634	AT3G54490.1	RPB5E	RNA polymerase II fifth largest subunit, E
Glyma.10G218600.1	1.01443	7.65892	8.85726	2.30951	3.17312	2.12972	8.93282	10.2334	7.17363	-1.79083	-1.20346	0.58737	PF00400	PTHR19857,PTHR19857:SF16				GO:0005515	AT1G71840.1		transducin family protein / WD-40 repeat family protein
Glyma.17G252200.1	99.414	79.4613	77.0582	1.15475	1.05771	1.06486	0.992536	0.930307	0.896704	0.217053	-6.28711	-6.50416	PF01370	PTHR10366:SF9,PTHR10366	KOG1502	1.1.1.219,1.1.1.234	K13082	GO:0016491,GO:0008152,GO:0003854,GO:0016616,GO:0006694,GO:0055114,GO:0003824,GO:0050662,GO:0044237	AT5G42800.1	DFR,M318,TT3	dihydroflavonol 4-reductase
Glyma.15G040400.1	741.547	711.322	674.923	892.625	786.933	843.368	729.514	834.486	685.082	0.165763	0.245741	0.0799782	PF00125	PTHR23430	KOG1756		K11251	GO:0003677	AT5G02560.1	HTA12	histone H2A 12
Glyma.17G262100.1	188.684	197.217	197.517	102.773	123.752	128.848	145.903	166.525	182.031	-0.476517	-0.715197	-0.23868	PF01073	PTHR10366,PTHR10366:SF20	KOG1430			GO:0016491,GO:0008152,GO:0003854,GO:0016616,GO:0006694,GO:0055114,GO:0003824,GO:0050662,GO:0044237,GO:0009058,GO:0008831,GO:0045226	AT2G33630.1		NAD(P)-binding Rossmann-fold superfamily protein
Glyma.15G007000.1	129.847	120.628	127.545	140.88	151.252	145.886	207.44	197.225	134.506	-0.299753	0.212529	0.512282	PF02845					GO:0005515	AT5G32440.3		Ubiquitin system component Cue protein
Glyma.10G149800.1	1.01443	0.957365	1.77145	3.46426	1.05771	1.06486	3.97014	5.58184	1.79341	-1.02201	0.57774	1.59975
Glyma.04G153000.1	18.2597	24.8915	23.9146	16.1666	17.981	7.45401	2.97761	2.79092	4.48352	2.02073	-0.688939	-2.70967
Glyma.06G036900.1	4.05771	9.57365	7.08581	5.77377	2.11541	5.3243	0.992536	4.65154	1.79341	0.829125	-0.648816	-1.47794	PF04759						AT5G42680.1		Protein of unknown function, DUF617
Glyma.17G196300.1	5.07214	9.57365	5.31436	4.61902	6.34623	1.06486	6.94775	5.58184	5.38022	-0.574101	-0.730472	-0.156372	PF00069,PF00582	PTHR24420,PTHR24420:SF203	KOG1187			GO:0004672,GO:0005524,GO:0006468,GO:0006950	AT2G24370.1		Protein kinase protein with adenine nucleotide alpha hydrolases-like domain
Glyma.02G105400.1	85.212	149.349	173.602	387.998	553.18	411.036	143.918	83.7277	139.886	1.87938	1.7281	-0.15128	PF04669						AT5G67210.1		Protein of unknown function (DUF579)
Glyma.08G173700.1	2722.73	2386.71	2729.81	4798.01	3531.68	3064.66	1531.48	1433.6	1288.56	1.42155	0.539532	-0.882013	PF04725				K03541	GO:0015979,GO:0009523,GO:0009654,GO:0042651	AT1G79040.1	PSBR	photosystem II subunit R
Glyma.06G093100.1	111.587	75.6318	65.5437	68.1305	87.7896	75.605	75.4327	66.9821	63.666	0.167958	-0.126615	-0.294573	PF00342	PTHR11469				GO:0004347,GO:0006094,GO:0006096	AT4G24620.1	PGI,PGI1	phosphoglucose isomerase 1
Glyma.14G109000.1	144.049	148.392	178.031	170.904	137.502	146.951	229.276	171.177	226.866	-0.462203	-0.047112	0.415091	PF00443,PF02148	PTHR24006,PTHR24006:SF57	KOG1867	3.1.2.15	K11366	GO:0004221,GO:0006511,GO:0008270	AT5G10790.1	UBP22	ubiquitin-specific protease 22
Glyma.17G261200.1	38.5483	35.4225	36.3148	33.4879	35.962	44.7241	59.5522	53.9578	53.8022	-0.551309	0.0499898	0.601299	PF05347	PTHR13675					AT1G76065.1		LYR family of Fe/S cluster biogenesis protein
Glyma.04G028100.1	14675.7	18720.3	15246	30415.1	19875.3	20732.8	16032.4	11638.1	15103.2	0.731565	0.546087	-0.185478	PF00847					GO:0003700,GO:0006355	AT1G75490.1		Integrase-type DNA-binding superfamily protein
Glyma.17G162500.1	1.01443	0.957365	0.885726	1.15475	1.05771	1.06486	6.94775	5.58184	8.07033	-2.65205	0.197753	2.8498
Glyma.02G058500.1	537.647	883.648	820.182	1329.12	1257.61	1353.44	1065.98	779.598	1002.51	0.46826	0.813808	0.345548		PTHR10593				GO:0046872	AT5G66730.1		C2H2-like zinc finger protein
Glyma.10G162200.1	110.573	62.2287	85.9154	33.4879	31.7312	27.6863	68.485	89.3095	81.6	-1.36556	-1.47754	-0.111984	PF02416					GO:0008565,GO:0015031	AT5G28750.1		Bacterial sec-independent translocation protein mttA/Hcf106
Glyma.01G161800.1	60.8657	44.0388	53.1436	51.964	51.8276	48.9835	52.6044	52.0972	50.2154	-0.0200866	-0.0489543	-0.0288677		PTHR24199:SF294,PTHR24199				GO:0005515	AT5G66055.2	AKRP,EMB16,EMB2036	ankyrin repeat protein
Glyma.10G190500.1	3.04329	2.87209	7.97153	2.30951	2.11541	3.19458	4.96268	4.65154	8.07033	-1.21472	-0.865958	0.348763	PF01657	PTHR11795:SF83,PTHR11795					AT1G04520.1	PDLP2	plasmodesmata-located protein 2
Glyma.18G272300.1	2.02886	9.57365	6.20008	2.30951	13.7502	6.38915	13.8955	16.7455	9.86374	-0.851451	0.334554	1.18601	PF00067	PTHR24286:SF21,PTHR24286	KOG0157	1.14.-.-	K12640	GO:0005506,GO:0009055,GO:0016705,GO:0020037,GO:0055114	AT3G30180.1	BR6OX2,CYP85A2	brassinosteroid-6-oxidase 2
Glyma.03G068700.1	134.919	160.837	159.431	123.559	92.0204	79.8644	204.462	183.271	232.246	-1.06934	-0.623577	0.445761	PF03690	PTHR11215	KOG2948				AT5G41970.1		Metal-dependent protein hydrolase
Glyma.18G265700.1	1.01443	0.957365	0.885726	1.15475	2.11541	1.06486	2.97761	1.86061	4.48352	-1.10456	0.601277	1.70584	PF00201	PTHR11926:SF15,PTHR11926	KOG1192			GO:0016758,GO:0008152	AT3G02100.1		UDP-Glycosyltransferase superfamily protein
Glyma.07G063100.1	22.3174	15.3178	18.6002	16.1666	7.40394	9.58373	13.8955	14.8849	7.17363	-0.116961	-0.762288	-0.645327							AT1G12220.1	RPS5	Disease resistance protein (CC-NBS-LRR class) family
Glyma.06G145000.1	144.049	88.0776	103.63	190.535	169.233	165.053	213.395	201.877	232.246	-0.303096	0.64441	0.947506	PF00782	PTHR10343,PTHR10343:SF15	KOG1716			GO:0008138,GO:0006470	AT3G10940.1		dual specificity protein phosphatase (DsPTP1) family protein
Glyma.17G183700.1	1.01443	1.91473	0.885726	1.15475	1.05771	2.12972	2.97761	2.79092	3.58681	-1.10737	0.18678	1.29415	PF08392,PF08541					GO:0016746,GO:0016747,GO:0006633,GO:0016020,GO:0008610	AT1G04220.1	KCS2	3-ketoacyl-CoA synthase 2
Glyma.13G208000.1	2759.25	3098.03	3041.58	2449.23	1859.45	1880.54	1156.3	1161.95	1058.11	0.874286	-0.523863	-1.39815		PTHR13683,PTHR13683:SF100	KOG1339				AT1G03220.1		Eukaryotic aspartyl protease family protein
Glyma.17G059100.1	67.9667	114.884	84.144	274.832	324.716	324.782	201.485	134.895	208.932	0.761327	1.7916	1.03027	PF06203					GO:0005515	AT5G57180.2	CIA2	chloroplast import apparatus 2
Glyma.12G027400.1	866.322	832.907	689.981	1732.13	1760.02	1769.8	1976.14	1670.83	1846.31	-0.0620713	1.13906	1.20114	PF00076	PTHR24012,PTHR24012:SF59	KOG0148			GO:0003676	AT3G18610.1	ATNUC-L2,NUC-L2,PARLL1	nucleolin like 2
Glyma.11G134100.1	3.04329	0.957365	2.65718	1.15475	1.05771	2.12972	2.97761	0.930307	1.79341	-0.392878	-0.616633	-0.223755
Glyma.13G365500.1	20.2886	21.062	14.1716	34.6426	41.2505	44.7241	11.9104	7.44246	2.69011	2.45204	1.1193	-1.33274	PF01429					GO:0003677,GO:0005634	AT1G15340.1	MBD10	methyl-CPG-binding domain 10
Glyma.01G173200.1	2.02886	0.957365	0.885726	1.15475	1.05771	2.12972	4.96268	0.930307	0.896704	-0.644927	0.165359	0.810286	PF01535	PTHR24015					AT5G66520.1		Tetratricopeptide repeat (TPR)-like superfamily protein
Glyma.11G215500.1	299.256	346.566	224.974	273.677	306.735	284.317	345.403	370.262	324.607	-0.26664	-0.0100884	0.256552	PF00120,PF03951	PTHR20852,PTHR20852:SF14	KOG0683	6.3.1.2	K01915	GO:0004356,GO:0006807,GO:0006542	AT5G37600.1	ATGLN1;1,ATGSR1,GLN1;1,GSR 1	glutamine synthase clone R1
Glyma.07G085800.1	49.707	49.783	39.8577	18.4761	25.3849	22.362	32.7537	27.9092	26.0044	-0.388154	-1.07328	-0.685129	PF00004,PF00023	PTHR24198:SF302,PTHR24198	KOG4214			GO:0005524,GO:0005515	AT3G24530.1		AAA-type ATPase family protein / ankyrin repeat family protein
Glyma.09G244500.1	1.01443	2.87209	4.42863	5.77377	8.46164	3.19458	0.992536	1.86061	1.79341	1.90734	1.06776	-0.83958
Glyma.15G003400.1	56.808	74.6744	75.2867	116.63	131.155	129.913	65.5074	43.7244	56.4923	1.18845	0.869214	-0.319237	PF03822,PF00069	PTHR24343,PTHR24343:SF45	KOG0583			GO:0004672,GO:0005524,GO:0006468,GO:0007165	AT5G25110.1	CIPK25,SnRK3.25	CBL-interacting protein kinase 25
Glyma.20G144300.1	7.101	1.91473	2.65718	1.15475	2.11541	3.19458	0.992536	0.930307	2.69011	0.486902	-0.852499	-1.3394	PF00083	PTHR24063:SF214,PTHR24063	KOG0254			GO:0022857,GO:0055085,GO:0016021	AT5G26340.1	ATSTP13,MSS1,STP13	Major facilitator superfamily protein
Glyma.10G029500.1	27.3896	26.8062	54.0293	15.0118	23.2695	12.7783	15.8806	27.9092	16.1407	-0.231106	-1.08378	-0.852673	PF00515	PTHR23083,PTHR23083:SF141				GO:0005515	AT4G02680.1	EOL1	ETO1-like 1
Glyma.12G142400.1	1.01443	0.957365	1.77145	4.61902	5.28853	2.12972	1.98507	0.930307	0.896704	1.65886	1.68515	0.0262898	PF00954,PF07714,PF08276,PF01453	PTHR24420,PTHR24420:SF432	KOG1187			GO:0004672,GO:0005524,GO:0006468,GO:0048544	AT4G21380.1	ARK3,RK3	receptor kinase 3
Glyma.01G228600.1	2.02886	0.957365	1.77145	1.15475	1.05771	1.06486	0.992536	4.65154	0.896704	-0.996946	-0.53774	0.459205							AT2G03780.1		Translin family protein
Glyma.18G095800.1	194.77	283.38	420.72	420.331	398.755	282.188	346.395	267.929	351.508	0.189329	0.292988	0.103659	PF04520						AT4G21970.1		Protein of unknown function, DUF584
Glyma.12G147300.1	536.633	412.624	336.576	526.568	414.621	455.76	498.253	389.799	434.901	0.0785169	0.119576	0.0410587	PF02683					GO:0017004,GO:0055114,GO:0016020	AT5G54290.2	CcdA	cytochrome c biogenesis protein family
Glyma.04G072400.1	14.202	14.3605	20.3717	16.1666	8.46164	8.51887	44.6641	18.6061	40.3517	-1.64438	-0.56196	1.08242	PF04357						AT2G25660.1	emb2410	embryo defective 2410
Glyma.16G150700.1	21.303	21.062	23.9146	1.15475	7.40394	4.25944	9.92536	10.2334	14.3473	-1.42866	-2.37038	-0.941718	PF01161	PTHR11362	KOG3346				AT1G65480.1	FT	PEBP (phosphatidylethanolamine-binding protein) family protein
Glyma.17G053100.1	108.544	136.903	135.516	128.178	132.213	143.756	120.097	120.94	168.58	-0.0193959	0.0852287	0.104625	PF00400	PTHR22847:SF1,PTHR22847	KOG0649		K13175	GO:0005515	AT2G19430.1	AtTHO6,DWA1,THO6	DWD (DDB1-binding WD40 protein) hypersensitive to ABA 1
Glyma.12G212100.1	7.101	11.4884	12.4002	3.46426	3.17312	8.51887	7.94029	12.094	7.17363	-0.844113	-1.03187	-0.187755	PF00226	PTHR25040:SF173,PTHR25040	KOG0716				AT2G42750.1		DNAJ heat shock N-terminal domain-containing protein
Glyma.06G277400.1	5.07214	1.91473	0.885726	1.15475	2.11541	3.19458	1.98507	0.930307	1.79341	0.457238	-0.284247	-0.741485	PF04852						AT2G42610.1	LSH10	Protein of unknown function (DUF640)
Glyma.06G019900.1	900.813	828.121	844.097	644.353	492.891	448.306	895.267	714.476	902.981	-0.664269	-0.698485	-0.0342161	PF01575	PTHR13078:SF5,PTHR13078	KOG1206			GO:0016491,GO:0008152	AT1G76150.1	ATECH2,ECH2	enoyl-CoA hydratase 2
Glyma.08G332000.1	66.9523	87.1202	65.5437	175.523	216.83	161.859	163.768	185.131	149.75	0.15241	1.33545	1.18304	PF01189	PTHR22807:SF11,PTHR22807	KOG1122				AT4G26600.1		S-adenosyl-L-methionine-dependent methyltransferases superfamily protein
Glyma.03G091800.1	160.28	185.729	186.002	99.3089	135.386	168.248	145.903	130.243	165.89	-0.133588	-0.40088	-0.267292	PF04811,PF00626,PF04810,PF08033,PF04815	PTHR11141	KOG1986			GO:0008270,GO:0006886,GO:0006888,GO:0030127	AT2G21630.1		Sec23/Sec24 protein transport family protein
Glyma.12G218700.1	340.848	360.927	300.261	369.522	216.83	293.901	284.858	309.792	239.42	0.0777486	-0.186945	-0.264693	PF00635	PTHR10809	KOG0439			GO:0005198	AT4G21450.1		PapD-like superfamily protein
Glyma.06G310000.1	2.02886	1.91473	0.885726	6.92853	3.17312	3.19458	0.992536	1.86061	2.69011	1.26221	1.46113	0.198917	PF01582,PF00931	PTHR11017,PTHR11017:SF20	KOG4658			GO:0043531,GO:0005515,GO:0007165	AT5G36930.2		Disease resistance protein (TIR-NBS-LRR class) family
Glyma.07G257000.1	48.6926	19.1473	21.2574	8.08328	5.28853	11.7135	13.8955	25.1183	12.5539	-1.03963	-1.82854	-0.788915	PF09335	PTHR12677					AT5G19070.1		SNARE associated Golgi protein family
Glyma.11G138600.1	15.2164	29.6783	22.1432	12.7023	21.1541	24.4918	24.8134	24.188	29.5912	-0.429706	-0.200289	0.229417	PF03514						AT1G07530.1	ATGRAS2,GRAS2,SCL14	SCARECROW-like 14
Glyma.16G135000.1	176.511	217.322	240.917	491.926	495.006	436.592	285.85	225.134	269.011	0.867929	1.16521	0.297278							AT3G50910.1
Glyma.20G232600.1	5.07214	6.70155	9.74299	4.61902	2.11541	2.12972	1.98507	4.65154	7.17363	-0.639684	-1.2794	-0.639718
Glyma.07G100700.1	213.03	216.364	279.889	399.545	415.678	424.879	296.768	244.671	314.743	0.53447	0.806024	0.271554	PF00249	PTHR10641,PTHR10641:SF30			K09422	GO:0003682	AT3G18100.1	AtMYB4R1,MYB4R1	myb domain protein 4r1
Glyma.06G066000.1	3.04329	3.82946	5.31436	5.77377	4.23082	1.06486	3.97014	1.86061	1.79341	0.537933	-0.138771	-0.676704	PF00036	PTHR12294:SF1,PTHR12294	KOG2643			GO:0005509	AT4G32060.1		calcium-binding EF hand family protein
Glyma.13G067100.1	18.2597	41.1667	31.0004	30.0236	43.3659	41.5295	32.7537	19.5365	17.0374	0.729118	0.345796	-0.383323	PF00560,PF08263	PTHR24420,PTHR24420:SF477				GO:0005515	AT3G28450.1		Leucine-rich repeat protein kinase family protein
Glyma.07G142100.1	60.8657	33.5078	30.1147	39.2617	49.7122	39.3998	42.679	19.5365	21.5209	0.616422	0.04434	-0.572082							AT3G54130.1		Josephin family protein
Glyma.18G047900.1	271.867	305.399	278.118	282.915	337.408	296.031	222.328	156.292	197.275	0.6701	0.0993322	-0.570768	PF00892		KOG4510			GO:0016020	AT3G02690.1		nodulin MtN21 /EamA-like transporter family protein
Glyma.16G065300.1	10.1443	2.87209	2.65718	10.3928	7.40394	7.45401	3.97014	5.58184	12.5539	0.191899	0.687993	0.496095	PF05758						ATCG01280.1		Chloroplast Ycf2;ATPase, AAA type, core
Glyma.02G139000.1	40.5771	24.8915	20.3717	11.5475	10.5771	29.8161	46.6492	34.4214	32.2813	-1.12587	-0.724791	0.401081							AT3G18510.1
Glyma.05G205400.1	2.02886	0.957365	0.885726	1.15475	2.11541	1.06486	0.992536	3.72123	2.69011	-0.77224	0.162981	0.935221							AT1G63245.1	CLE14	CLAVATA3/ESR-RELATED 14
Glyma.19G192700.1	18.2597	14.3605	11.5144	3.46426	3.17312	1.06486	4.96268	10.2334	8.96704	-1.64946	-2.51856	-0.869106	PF08880,PF08879					GO:0005515,GO:0005524,GO:0016818,GO:0006355,GO:0005634	AT3G52910.1	AtGRF4,GRF4	growth-regulating factor 4
Glyma.05G227000.1	658.364	525.593	614.694	464.211	479.141	462.149	547.88	412.126	487.807	-0.0427907	-0.355831	-0.313041	PF04179		KOG2634			GO:0016763	AT2G40570.1		initiator tRNA phosphoribosyl transferase family protein
Glyma.17G008000.1	2.02886	4.78682	5.31436	3.46426	2.11541	3.19458	0.992536	0.930307	0.896704	1.63781	-0.467236	-2.10505	PF04526,PF03188	PTHR23130,PTHR23130:SF18	KOG4293			GO:0016021	AT5G47530.1		Auxin-responsive family protein
Glyma.U017200.1	107.529	66.0582	59.3436	56.583	59.2315	31.9458	57.5671	72.564	47.5253	-0.265831	-0.656646	-0.390815
Glyma.11G002100.1	2.02886	2.87209	4.42863	2.30951	4.23082	1.06486	0.992536	0.930307	5.38022	0.0584823	-0.294828	-0.35331							AT4G33800.1
Glyma.13G194100.1	12.1731	18.1899	15.0573	10.3928	7.40394	11.7135	4.96268	2.79092	4.48352	1.26995	-0.622128	-1.89208	PF00560,PF00931	PTHR23155:SF236,PTHR23155	KOG4658			GO:0005515,GO:0043531	AT3G14470.1		NB-ARC domain-containing disease resistance protein
Glyma.02G041900.1	7.101	9.57365	15.0573	5.77377	17.981	5.3243	6.94775	13.9546	1.79341	0.357558	-0.125957	-0.483515	PF00266	PTHR21152:SF1,PTHR21152	KOG2790	2.6.1.52	K00831	GO:0008152	AT4G35630.1	PSAT	phosphoserine aminotransferase
Glyma.11G251800.1	576.196	431.771	445.52	66.9758	96.2512	85.1887	403.962	510.739	374.822	-2.37601	-2.54869	-0.172681							AT1G27300.1
Glyma.20G029600.1	38.5483	42.124	46.0578	56.583	45.4813	59.6321	46.6492	38.1426	32.2813	0.465878	0.351529	-0.114349	PF08414					GO:0004601,GO:0050664,GO:0055114
Glyma.16G041700.1	4.05771	3.82946	1.77145	1.15475	1.05771	1.06486	1.98507	0.930307	1.79341	-0.522839	-1.5593	-1.03646		PTHR11122:SF5,PTHR11122	KOG1594				AT1G64770.1	NDF2,NDH45	NDH-dependent cyclic electron flow 1
Glyma.08G137400.1	4.05771	0.957365	1.77145	1.15475	3.17312	1.06486	0.992536	0.930307	2.69011	0.225325	-0.331658	-0.556983
Glyma.02G132700.1	2.02886	1.91473	1.77145	1.15475	6.34623	3.19458	3.97014	2.79092	0.896704	0.482017	0.904178	0.422161	PF08553		KOG2395				AT3G19240.1		Vacuolar import/degradation, Vid27-related protein
Glyma.04G013400.1	2.02886	1.91473	2.65718	2.30951	2.11541	3.19458	1.98507	3.72123	0.896704	0.206573	0.207063	0.000489455	PF10950						AT1G49310.1
Glyma.06G052300.1	12.1731	8.61628	9.74299	8.08328	17.981	23.4269	17.8656	30.7001	31.3846	-0.691934	0.69683	1.38876	PF05875					GO:0016811,GO:0006672,GO:0016021	AT5G11870.2		Alkaline phytoceramidase (aPHC)
Glyma.15G264100.1	47.6782	42.124	36.3148	81.9876	32.7889	34.0755	25.8059	31.6304	23.3143	0.882332	0.239116	-0.643216	PF02365					GO:0003677,GO:0006355	AT1G54330.1	ANAC020,NAC020	NAC domain containing protein 20
Glyma.20G210300.1	89.2697	60.314	73.5153	50.8092	34.9043	43.6592	44.6641	41.8638	41.2484	0.017913	-0.78615	-0.804063	PF01544	PTHR13890	KOG2662			GO:0046873,GO:0030001,GO:0055085,GO:0016020	AT5G64560.1	ATMGT9,MGT9,MRS2-2	magnesium transporter 9
Glyma.05G224300.1	3.04329	3.82946	6.20008	1.15475	2.11541	3.19458	7.94029	10.2334	2.69011	-1.69034	-1.01591	0.674429	PF00249	PTHR10641	KOG0048			GO:0003682	AT5G65790.1	ATMYB68,MYB68	myb domain protein 68
Glyma.02G284600.1	41.5916	48.8256	59.3436	90.0709	104.713	92.6427	82.3805	71.6337	88.7737	0.243497	0.940533	0.697036	PF00903	PTHR11959	KOG0638				AT1G06570.1	HPD,PDS1	phytoene desaturation 1
Glyma.15G177600.1	124.775	222.109	224.089	127.023	138.559	154.405	170.716	156.292	200.862	-0.329836	-0.443075	-0.113239	PF03133	PTHR12241,PTHR12241:SF13	KOG2155			GO:0006464	AT1G77550.1		tubulin-tyrosine ligases;tubulin-tyrosine ligases
Glyma.03G097100.1	28.404	34.4651	30.1147	33.4879	24.3272	34.0755	18.8582	26.0486	46.6286	0.00558796	-0.0170623	-0.0226502	PF01728,PF01479	PTHR10436:SF37,PTHR10436			K06442	GO:0003723,GO:0008168,GO:0032259	AT3G25470.1		bacterial hemolysin-related
Glyma.09G218700.1	154.193	162.752	169.174	286.379	173.464	174.637	120.097	77.2155	96.844	1.10899	0.384265	-0.724726	PF03824					GO:0015087,GO:0015099,GO:0046872,GO:0006824,GO:0015675,GO:0055085,GO:0016021,GO:0017004,GO:0055114,GO:0016020	AT2G16800.1		high-affinity nickel-transport family protein
Glyma.03G184200.1	61.8802	63.1861	69.0866	31.1784	43.3659	24.4918	56.5745	69.7731	60.0791	-0.912583	-0.971167	-0.0585841	PF00994,PF01507	PTHR23293	KOG2644			GO:0006777,GO:0003824,GO:0008152	AT5G03430.1		phosphoadenosine phosphosulfate (PAPS) reductase family protein
Glyma.05G236900.1	1.01443	0.957365	0.885726	15.0118	26.4426	22.362	0.992536	2.79092	2.69011	3.3013	4.48109	1.1798	PF01095,PF04043	PTHR22931,PTHR22931:SF5				GO:0030599,GO:0042545,GO:0005618,GO:0004857	AT1G23200.1		Plant invertase/pectin methylesterase inhibitor superfamily
Glyma.06G063200.1	5.07214	6.70155	12.4002	11.5475	16.9233	17.0377	9.92536	4.65154	7.17363	1.06509	0.912691	-0.152398	PF00004,PF07724,PF10431	PTHR11638:SF18,PTHR11638	KOG1051			GO:0005524,GO:0008134,GO:0006355,GO:0016887	AT2G25140.1	CLPB-M,CLPB4,HSP98.7	casein lytic proteinase B4
Glyma.10G234800.1	162.309	236.469	178.917	229.796	264.426	239.593	144.91	141.407	161.407	0.71281	0.345112	-0.367698	PF05645,PF08221	PTHR12949	KOG2587			GO:0003677,GO:0003899,GO:0006351	AT3G49000.1		RNA polymerase III subunit RPC82 family protein
Glyma.01G149700.1	183.612	232.64	201.06	101.618	148.079	112.875	411.902	266.998	365.855	-1.52683	-0.767729	0.759096	PF00574	PTHR10381	KOG0840				AT5G45390.1	CLPP4,NCLPP4	CLP protease P4
Glyma.14G191100.1	75.0677	89.0349	100.087	226.332	255.965	269.409	104.216	125.591	92.3605	1.22235	1.50859	0.28624	PF05340						AT5G58930.1		Protein of unknown function (DUF740)
Glyma.08G193100.1	296.213	250.83	296.718	438.807	477.025	532.43	486.343	566.557	518.295	-0.11754	0.779416	0.896956	PF05199,PF00732	PTHR11552:SF31,PTHR11552	KOG1238			GO:0016614,GO:0050660,GO:0055114	AT1G72970.1	EDA17,HTH	Glucose-methanol-choline (GMC) oxidoreductase family protein
Glyma.09G083000.1	28478.1	22152.5	25353.9	33606.8	26459.6	26296.7	24223.8	23243.7	22961	0.294254	0.184711	-0.109543
Glyma.20G167600.1	231.29	194.345	206.374	167.439	191.445	134.172	392.052	411.196	343.438	-1.21764	-0.358192	0.859452	PF00416	PTHR10871	KOG3311		K02964	GO:0003723,GO:0003735,GO:0006412,GO:0005622,GO:0005840	AT4G09800.1	RPS18C	S18 ribosomal protein
Glyma.03G023300.1	6.08657	9.57365	9.74299	1.15475	1.05771	1.06486	0.992536	0.930307	0.896704	0.217053	-2.95442	-3.17148
Glyma.11G130800.1	6.08657	3.82946	1.77145	5.77377	3.17312	1.06486	2.97761	15.8152	5.38022	-1.27171	-0.22327	1.04844		PTHR22850,PTHR22850:SF46					AT5G12920.1		Transducin/WD40 repeat-like superfamily protein
Glyma.14G081900.1	42.606	32.5504	36.3148	23.0951	51.8276	24.4918	32.7537	48.376	36.7649	-0.245969	-0.165144	0.0808259
Glyma.02G282400.1	156.222	86.1628	126.659	121.249	99.4243	104.356	84.3656	120.94	95.9473	0.109597	-0.18322	-0.292817	PF02453	PTHR10994:SF27,PTHR10994	KOG1792				AT3G10260.3		Reticulon family protein
Glyma.16G028300.1	45.6493	30.6357	40.7434	1.15475	1.05771	1.06486	2.97761	2.79092	0.896704	-1.02414	-5.1582	-4.13406							AT3G07568.1
Glyma.09G104600.1	44.6349	48.8256	33.6576	98.1542	85.6742	83.059	51.6119	49.3063	55.5956	0.769941	1.07006	0.300121		PTHR12197:SF89,PTHR12197					AT5G06620.1	ATXR4,SDG38	SET domain protein 38
Glyma.15G173200.1	128.832	170.411	139.945	152.428	155.483	165.053	171.709	158.152	198.172	-0.158898	0.10689	0.265788	PF01805,PF00240,PF12230	PTHR15316	KOG0007			GO:0005515,GO:0003723,GO:0006396	AT1G14650.1		SWAP (Suppressor-of-White-APricot)/surp domain-containing protein / ubiquitin family protein
Glyma.11G137300.1	130.861	158.923	175.374	210.165	295.1	227.88	170.716	123.731	141.679	0.749353	0.656379	-0.0929738	PF00097,PF06547	PTHR22763				GO:0046872,GO:0008270,GO:0005515	AT5G59550.1		zinc finger (C3HC4-type RING finger) family protein
Glyma.10G017400.1	299.256	205.833	240.917	248.272	221.06	257.696	307.686	279.092	260.044	-0.220047	-0.0371777	0.18287	PF04398						AT4G02360.1		Protein of unknown function, DUF538
Glyma.06G012300.1	1.01443	2.87209	1.77145	3.46426	2.11541	2.12972	2.97761	1.86061	0.896704	0.426843	0.446332	0.0194891	PF00076	PTHR24011,PTHR24011:SF69				GO:0003676	AT4G34110.1	ATPAB2,PAB2,PABP2	poly(A) binding protein 2
Glyma.10G111100.1	80.1399	86.1628	62.8865	56.583	38.0774	33.0106	33.7462	53.9578	33.178	0.0788307	-0.844108	-0.922939	PF01814						AT3G54290.1
Glyma.06G126500.1	17.2453	13.4031	19.486	13.8571	16.9233	21.2972	14.888	12.094	7.17363	0.608536	0.0548611	-0.553675	PF00106	PTHR24319:SF102,PTHR24319	KOG1208			GO:0016491,GO:0008152	AT5G04070.1		NAD(P)-binding Rossmann-fold superfamily protein
Glyma.01G201400.1	62.8946	44.9961	35.429	20.7856	41.2505	28.7512	56.5745	66.9821	43.0418	-0.875813	-0.658675	0.217137	PF00408,PF02880	PTHR22573:SF3,PTHR22573				GO:0016868,GO:0005975	AT5G18070.1	DRT101	phosphoglucosamine mutase-related
Glyma.17G073100.1	531.561	388.69	441.092	1055.45	931.839	964.762	591.551	540.509	498.567	0.856289	1.11669	0.260397							AT5G57910.1
Glyma.13G298600.1	10.1443	5.74419	9.74299	5.77377	13.7502	12.7783	2.97761	5.58184	0.896704	1.77231	0.333719	-1.43859	PF00847					GO:0003700,GO:0006355	AT2G20880.1		Integrase-type DNA-binding superfamily protein
Glyma.04G227300.1	91.2986	46.9109	59.3436	47.3449	51.8276	86.2536	114.142	115.358	104.018	-0.846917	-0.0913961	0.755521	PF01849,PF00627	PTHR21713	KOG2239		K03626	GO:0005515	AT3G49470.1	NACA2	nascent polypeptide-associated complex subunit alpha-like protein 2
Glyma.14G172700.1	1.01443	0.957365	0.885726	2.30951	1.05771	1.06486	0.992536	3.72123	1.79341	-0.554049	0.633219	1.18727	PF00083	PTHR24063,PTHR24063:SF213	KOG0254			GO:0022857,GO:0055085,GO:0016021	AT1G34580.1		Major facilitator superfamily protein
Glyma.10G209800.1	17.2453	15.3178	18.6002	6.92853	5.28853	7.45401	5.95522	3.72123	4.48352	0.474258	-1.37904	-1.85329	PF00221	PTHR10362,PTHR10362:SF3	KOG0222	4.3.1.24	K10775	GO:0016841,GO:0009058	AT3G53260.1	ATPAL2,PAL2	phenylalanine ammonia-lyase 2
Glyma.11G099400.1	1.01443	0.957365	0.885726	11.5475	13.7502	5.3243	0.992536	0.930307	0.896704	3.44103	3.42173	-0.0193	PF02966	PTHR12052	KOG3414			GO:0045454,GO:0007067,GO:0005681	AT5G08290.1	YLS8	mRNA splicing factor, thioredoxin-like U5 snRNP
Glyma.08G029000.1	16.2309	23.9341	17.7145	30.0236	29.6158	23.4269	15.8806	21.3971	14.3473	0.686196	0.521211	-0.164985	PF08211,PF00383	PTHR11644,PTHR11644:SF5	KOG0833	3.5.4.5	K01489	GO:0008270,GO:0016787,GO:0004126,GO:0009972	AT2G19570.1	AT-CDA1,CDA1,DESZ	cytidine deaminase 1
Glyma.11G200500.1	17.2453	24.8915	10.6287	17.3213	27.5003	9.58373	8.93282	11.1637	12.5539	0.736651	0.0441553	-0.692495	PF06697						AT3G08600.1		Protein of unknown function (DUF1191)
Glyma.01G185300.1	286.069	262.318	268.375	191.689	192.502	183.156	279.895	249.322	333.574	-0.604779	-0.525683	0.0790961	PF00557	PTHR10804:SF50,PTHR10804	KOG2738	3.4.11.18	K01265	GO:0009987	AT4G37040.1	MAP1D	methionine aminopeptidase 1D
Glyma.08G139100.1	2.02886	1.91473	4.42863	2.30951	1.05771	3.19458	1.98507	1.86061	0.896704	0.468476	-0.35152	-0.819995	PF00254	PTHR10516,PTHR10516:SF15	KOG0544			GO:0006457	AT4G39710.1	FKBP16-2	FK506-binding protein 16-2
Glyma.06G054600.1	180.568	169.454	176.259	117.785	108.944	121.394	231.261	246.531	225.073	-1.01365	-0.596239	0.417413	PF01189	PTHR22807:SF4,PTHR22807	KOG2360				AT5G26180.1		S-adenosyl-L-methionine-dependent methyltransferases superfamily protein
Glyma.19G175400.1	52.7503	43.0814	50.4864	39.2617	48.6545	47.9187	84.3656	72.564	71.7363	-0.751388	-0.107255	0.644133	PF00023	PTHR24186,PTHR24186:SF119	KOG4412			GO:0005515	AT5G60070.1		ankyrin repeat family protein
Glyma.18G026500.1	6.08657	8.61628	7.08581	3.46426	2.11541	3.19458	2.97761	4.65154	4.48352	-0.465168	-1.31223	-0.847062	PF03171	PTHR10209:SF55,PTHR10209	KOG0143			GO:0016491,GO:0016706,GO:0055114	AT5G05600.1		2-oxoglutarate (2OG) and Fe(II)-dependent oxygenase superfamily protein
Glyma.15G027100.1	11.1587	24.8915	9.74299	130.487	100.482	94.7725	19.8507	3.72123	4.48352	3.53738	2.83052	-0.706851	PF09258	PTHR11062,PTHR11062:SF3				GO:0016758,GO:0031227	AT1G80290.2		Nucleotide-diphospho-sugar transferases superfamily protein
Glyma.05G216600.1	6.08657	5.74419	9.74299	17.3213	13.7502	14.908	16.8731	18.6061	17.9341	-0.216208	1.09171	1.30792	PF00501	PTHR24096	KOG1256	6.2.1.3	K01897	GO:0003824,GO:0008152	AT4G23850.1	LACS4	AMP-dependent synthetase and ligase family protein
Glyma.20G097600.1	69.9956	54.5698	54.915	32.3331	14.8079	39.3998	98.2611	78.1458	49.3187	-1.38312	-1.05237	0.330744							AT1G56423.1
Glyma.16G023300.1	182.597	378.159	332.147	292.153	269.715	357.793	199.5	189.783	270.805	0.478445	0.0425972	-0.435848	PF00400,PF12234	PTHR13950,PTHR13950:SF8	KOG1064			GO:0005515	AT2G46560.1		transducin family protein / WD-40 repeat family protein
Glyma.09G005600.1	10.1443	9.57365	5.31436	15.0118	50.7699	46.8538	8.93282	1.86061	1.79341	3.16167	2.1698	-0.991874	PF00026,PF03489,PF05184	PTHR13683,PTHR13683:SF85	KOG1339	3.4.23.40	K08245	GO:0004190,GO:0006508,GO:0006629	AT1G11910.1	APA1,ATAPA1	aspartic proteinase A1
Glyma.16G222000.1	24.3463	31.593	47.8292	21.9403	31.7312	30.8809	51.6119	50.2366	66.3561	-0.992299	-0.295451	0.696848	PF00078,PF01348					GO:0003723,GO:0003964,GO:0006278,GO:0006397	AT5G04050.1		RNA-directed DNA polymerase (reverse transcriptase)
Glyma.11G162200.1	8.11543	4.78682	12.4002	10.3928	13.7502	8.51887	5.95522	4.65154	1.79341	1.39725	0.368331	-1.02892	PF00124					GO:0045156,GO:0009772,GO:0019684	ATCG00020.1		photosystem II reaction center protein A
Glyma.11G040800.1	36.5194	33.5078	25.6861	12.7023	9.51935	17.0377	25.8059	30.7001	18.8308	-0.940318	-1.28568	-0.345363	PF00702	PTHR18901	KOG2914				AT2G38740.1		Haloacid dehalogenase-like hydrolase (HAD) superfamily protein
Glyma.17G187400.1	318.531	343.694	347.205	476.914	488.66	561.181	460.537	354.447	428.624	0.295936	0.596928	0.300992	PF01612,PF00570	PTHR12124:SF2,PTHR12124	KOG2206	3.1.13.-	K12591	GO:0003676,GO:0005622,GO:0008408,GO:0006139	AT5G35910.1		Polynucleotidyl transferase, ribonuclease H fold protein with HRDC domain
Glyma.20G223200.1	4.05771	4.78682	7.08581	12.7023	23.2695	11.7135	10.9179	5.58184	8.96704	0.904928	1.58177	0.676839	PF01212	PTHR10289	KOG1368	4.1.2.5	K01620	GO:0030170,GO:0009058,GO:0016829,GO:0006520	AT1G08630.1	THA1	threonine aldolase 1
Glyma.06G181900.1	164.337	199.132	184.231	200.927	127.982	175.702	185.604	221.413	224.176	-0.322909	-0.118214	0.204695	PF00955	PTHR11453:SF6,PTHR11453				GO:0006820,GO:0016021	AT3G62270.1		HCO3- transporter family
Glyma.19G194500.1	345.92	322.632	357.833	713.638	620.873	681.51	462.522	465.154	467.183	0.531393	0.973938	0.442546	PF00170	PTHR22952:SF35,PTHR22952				GO:0003700,GO:0043565,GO:0006355	AT2G36270.1	ABI5,GIA1	Basic-leucine zipper (bZIP) transcription factor family protein
Glyma.14G196200.1	250.564	206.791	179.802	108.547	188.272	163.988	65.5074	125.591	84.2901	0.742691	-0.467487	-1.21018	PF02535	PTHR11040,PTHR11040:SF1	KOG1558			GO:0046873,GO:0030001,GO:0055085,GO:0016020	AT2G30080.1	ATZIP6,ZIP6	ZIP metal ion transporter family
Glyma.18G152400.1	12.1731	1.91473	5.31436	3.46426	1.05771	4.25944	0.992536	20.4668	5.38022	-1.61183	-1.1437	0.468136	PF00234						AT5G48490.1		Bifunctional inhibitor/lipid-transfer protein/seed storage 2S albumin superfamily protein
Glyma.05G010100.1	64.9234	22.0194	27.4575	11.5475	13.7502	12.7783	21.8358	23.2577	17.9341	-0.727099	-1.58714	-0.860037
Glyma.12G232300.1	17.2453	6.70155	9.74299	10.3928	14.8079	13.8432	8.93282	8.37277	1.79341	1.0316	0.212782	-0.818816	PF00471				K02913	GO:0003735,GO:0006412,GO:0005622,GO:0005840	ATCG00640.1		ribosomal protein L33
Glyma.18G229300.1	15.2164	12.4457	19.486	8.08328	9.51935	18.1026	6.94775	3.72123	4.48352	1.23658	-0.401065	-1.63765	PF03949,PF00390	PTHR23406:SF2,PTHR23406	KOG1257			GO:0016616,GO:0016619,GO:0055114,GO:0051287	AT4G00570.1	NAD-ME2	NAD-dependent malic enzyme 2
Glyma.13G128700.1	137.962	121.585	87.6869	98.1542	96.2512	97.967	133.992	128.382	121.952	-0.394525	-0.248103	0.146422	PF01843,PF00612,PF00063,PF02736	PTHR13140	KOG0160			GO:0003774,GO:0005524,GO:0016459,GO:0005515	AT5G43900.3	ATMYA2,MYA2,XI-2,XI-6	myosin 2
Glyma.06G038500.1	104.486	124.457	104.516	107.392	120.578	113.94	75.4327	71.6337	97.7407	0.481974	0.0361085	-0.445865							AT4G33380.1
Glyma.05G000400.1	28.404	3.82946	10.6287	23.0951	24.3272	26.6215	24.8134	18.6061	17.0374	0.292472	0.788674	0.496202		PTHR22939,PTHR22939:SF1					AT5G36950.1	DegP10	DegP protease 10
Glyma.17G195400.1	1.01443	0.957365	0.885726	3.46426	4.23082	10.6486	0.992536	6.51215	3.58681	0.725828	2.68245	1.95662
Glyma.10G260200.1	146.078	188.601	213.46	187.07	204.137	140.561	141.933	131.173	137.196	0.374114	-0.0437413	-0.417856							AT2G14910.1
Glyma.13G187400.1	1.01443	1.91473	1.77145	1.15475	1.05771	4.25944	3.97014	0.930307	0.896704	0.158844	0.461341	0.302497
Glyma.13G146200.1	7.101	6.70155	2.65718	6.92853	4.23082	6.38915	5.95522	4.65154	5.38022	0.134451	0.0924073	-0.042044	PF00121	PTHR21139	KOG1643	5.3.1.1	K01803	GO:0004807,GO:0008152	AT2G21170.1	PDTPI,TIM	triosephosphate isomerase
Glyma.03G164400.1	172.453	147.434	178.031	61.202	77.2125	75.605	103.224	196.295	143.473	-1.04954	-1.21817	-0.16863	PF05817	PTHR12640	KOG2447			GO:0006487,GO:0008250,GO:0016021	AT4G21150.1	HAP6	ribophorin II (RPN2) family protein
Glyma.03G258000.1	66.9523	89.0349	75.2867	92.3804	88.8473	60.697	38.7089	34.4214	43.0418	1.05829	0.064955	-0.99334	PF02229,PF08766	PTHR11439:SF93,PTHR11439	KOG2712			GO:0003677,GO:0003713,GO:0006355	AT4G00980.1		zinc knuckle (CCHC-type) family protein
Glyma.13G161900.1	1.01443	2.87209	0.885726	1.15475	2.11541	2.12972	0.992536	0.930307	0.896704	0.937465	0.178259	-0.759206	PF00149	PTHR22953	KOG1378			GO:0016787	AT5G34850.1	ATPAP26,PAP26	purple acid phosphatase 26
Glyma.08G266400.1	1260.93	975.555	1030.99	1577.4	1300.98	1266.12	1042.16	905.189	955.886	0.513532	0.343019	-0.170513			KOG3294				AT5G11680.1
Glyma.08G231200.1	5.07214	13.4031	10.6287	3.46426	8.46164	5.3243	15.8806	9.30307	10.7604	-1.05914	-0.754602	0.304539							AT4G30150.1
Glyma.18G224200.1	29.4184	32.5504	14.1716	15.0118	12.6925	15.9729	20.8433	18.6061	17.9341	-0.393756	-0.801784	-0.408028	PF01501	PTHR13778,PTHR13778:SF4		2.4.1.43	K13648	GO:0016757	AT3G61130.1	GAUT1,LGT1	galacturonosyltransferase 1
Glyma.14G210400.1	15.2164	31.593	24.8003	26.5594	32.7889	33.0106	24.8134	23.2577	28.6945	0.266791	0.367094	0.100303							AT3G03210.1
Glyma.12G047600.1	3.04329	2.87209	1.77145	4.61902	2.11541	2.12972	2.97761	0.930307	1.79341	0.636685	0.205593	-0.431093
Glyma.14G167400.1	14.202	31.593	38.9719	50.8092	34.9043	44.7241	22.8283	33.4911	34.9714	0.514818	0.621785	0.106968	PF01553	PTHR15486				GO:0016746,GO:0008152	AT1G02390.1	ATGPAT2,GPAT2	glycerol-3-phosphate acyltransferase 2
Glyma.10G014000.1	120.717	169.454	143.488	660.52	740.394	718.78	233.246	134.895	179.341	1.95297	2.28923	0.336251	PF00226	PTHR22904:SF7,PTHR22904	KOG0550			GO:0005515	AT4G02100.1		Heat shock protein DnaJ with tetratricopeptide repeat
Glyma.10G182200.1	23.3319	13.4031	23.0289	1.15475	1.05771	1.06486	0.992536	0.930307	0.896704	0.217053	-4.18868	-4.40574	PF01417	PTHR12276:SF10,PTHR12276					AT3G23350.1		ENTH/VHS family protein
Glyma.09G070900.1	323.603	234.554	248.003	496.545	306.735	386.544	235.231	292.117	195.481	0.719021	0.561608	-0.157413	PF00092	PTHR10338,PTHR10338:SF8					AT1G19110.1		inter-alpha-trypsin inhibitor heavy chain-related
Glyma.04G050600.1	686.768	785.039	695.295	734.424	887.415	690.029	1044.15	773.085	911.948	-0.239409	0.0932916	0.332701	PF01058	PTHR11995	KOG1687			GO:0051536,GO:0055114	AT5G11770.1		NADH-ubiquinone oxidoreductase 20 kDa subunit, mitochondrial
Glyma.08G106900.1	4.05771	3.82946	0.885726	1.15475	7.40394	4.25944	4.96268	3.72123	1.79341	0.290917	0.54706	0.256144							AT3G57450.1
Glyma.03G138200.1	42.606	59.3566	62.8865	103.928	79.3279	85.1887	43.6716	61.4003	64.5627	0.662194	0.703478	0.0412833	PF00625	PTHR23117:SF1,PTHR23117	KOG0707	2.7.4.8	K00942	GO:0005515	AT3G57550.1	AGK2,GK-2	guanylate kinase
Glyma.01G232300.1	88.2553	68.9303	62.0008	56.583	65.5777	46.8538	57.5671	44.6548	37.6616	0.272923	-0.375011	-0.647934	PF00076	PTHR24622:SF32,PTHR24622				GO:0003676	AT2G27330.1		RNA-binding (RRM/RBD/RNP motifs) family protein
Glyma.20G076700.1	66.9523	115.841	108.059	84.2971	70.8663	90.513	81.3879	82.7974	78.9099	0.0152377	-0.243526	-0.258764	PF00097	PTHR22766,PTHR22766:SF25				GO:0046872,GO:0005515,GO:0008270	AT1G04790.1		RING/U-box superfamily protein
Glyma.18G089900.1	1.01443	0.957365	1.77145	1.15475	1.05771	1.06486	0.992536	0.930307	2.69011	-0.493175	-0.191773	0.301401							AT4G26760.1	MAP65-2	microtubule-associated protein 65-2
Glyma.13G341700.1	484.897	540.911	526.121	989.625	834.53	863.601	601.477	451.199	571.2	0.72696	0.792339	0.0653787	PF00010	PTHR10985:SF42,PTHR10985				GO:0046983	AT1G51140.1		basic helix-loop-helix (bHLH) DNA-binding superfamily protein
Glyma.16G163600.1	80.1399	67.0155	74.401	112.011	83.5587	75.605	92.3058	63.2609	58.2857	0.342608	0.29155	-0.051058							AT4G09830.1		Uncharacterised conserved protein UCP009193
Glyma.15G240000.1	20.2886	15.3178	25.6861	21.9403	28.5581	36.2052	2.97761	2.79092	3.58681	3.21223	0.500382	-2.71185	PF10699						AT4G11720.1	GCS1,HAP2	hapless 2
Glyma.06G040000.1	3.04329	18.1899	17.7145	10.3928	13.7502	10.6486	3.97014	8.37277	8.07033	0.769232	-0.162802	-0.932034	PF01535	PTHR24015:SF4,PTHR24015					AT2G04860.1		Tetratricopeptide repeat (TPR)-like superfamily protein
Glyma.04G051300.1	18.2597	15.3178	19.486	10.3928	26.4426	8.51887	49.6268	40.9335	46.6286	-1.59685	-0.226481	1.37037	PF00320	PTHR10071				GO:0003700,GO:0008270,GO:0043565,GO:0006355	AT4G26150.1	CGA1,GATA22	cytokinin-responsive gata factor 1
Glyma.08G039100.1	278.968	294.868	285.204	372.986	455.871	373.766	320.589	280.953	291.429	0.429499	0.485387	0.0558874	PF07899						AT3G22440.1		FRIGIDA-like protein
Glyma.09G167500.1	5.07214	9.57365	6.20008	11.5475	13.7502	8.51887	15.8806	3.72123	8.07033	0.289297	0.69797	0.408672							AT1G53345.1
Glyma.19G136100.1	5.07214	4.78682	4.42863	3.46426	3.17312	4.25944	9.92536	6.51215	2.69011	-0.811751	-0.390856	0.420894	PF07479,PF01210	PTHR11728	KOG2711			GO:0016616,GO:0051287,GO:0046168,GO:0055114,GO:0005737,GO:0004367,GO:0005975	AT2G41540.1	GPDHC1	6-phosphogluconate dehydrogenase family protein
Glyma.09G204600.1	11.1587	18.1899	18.6002	21.9403	15.8656	12.7783	14.888	31.6304	17.0374	-0.329337	0.0771903	0.406528	PF00443	PTHR24006,PTHR24006:SF250	KOG1865			GO:0004221,GO:0006511	AT4G17895.1	UBP20	ubiquitin-specific protease 20
Glyma.12G048900.1	17.2453	14.3605	2.65718	4.61902	2.11541	4.25944	15.8806	24.188	12.5539	-2.25898	-1.63995	0.619029	PF05697					GO:0006457,GO:0015031	AT2G30695.1
Glyma.02G250800.1	53.7647	69.8876	68.2009	33.4879	32.7889	38.3349	25.8059	33.4911	33.178	0.177908	-0.874959	-1.05287	PF00132,PF00483	PTHR22572	KOG1322			GO:0016779,GO:0009058	AT2G39770.1	CYT1,EMB101,GMP1,SOZ1,VTC1	Glucose-1-phosphate adenylyltransferase family protein
Glyma.06G065800.1	1.01443	0.957365	0.885726	2.30951	2.11541	1.06486	0.992536	0.930307	2.69011	0.251057	0.941985	0.690928							AT2G25270.1
Glyma.08G240100.1	44.6349	35.4225	31.8861	10.3928	21.1541	21.2972	27.791	54.8881	17.9341	-0.929006	-1.08296	-0.153951	PF00583	PTHR23091:SF34,PTHR23091				GO:0008080	AT1G72030.1		Acyl-CoA N-acyltransferases (NAT) superfamily protein
Glyma.17G032300.1	53.7647	20.1047	33.6576	27.7141	31.7312	64.9564	24.8134	63.2609	38.5583	-0.0256423	0.210307	0.23595	PF07992,PF00070,PF02852	PTHR22912,PTHR22912:SF49	KOG1335	1.8.1.4	K00382	GO:0016491,GO:0050660,GO:0055114,GO:0008033,GO:0045454	AT3G16950.1	LPD1,ptlpd1	lipoamide dehydrogenase 1
Glyma.15G116800.1	155.208	175.198	160.316	153.582	142.79	149.08	182.627	158.152	171.27	-0.20101	-0.139632	0.0613774	PF04535	PTHR11615,PTHR11615:SF57					AT2G35760.1		Uncharacterised protein family (UPF0497)
Glyma.19G159500.1	2.02886	0.957365	3.5429	4.61902	6.34623	2.12972	2.97761	0.930307	0.896704	1.44652	1.00405	-0.442468	PF00447	PTHR10015,PTHR10015:SF7	KOG0627			GO:0003700,GO:0043565,GO:0006355,GO:0005634	AT3G22830.1	AT-HSFA6B,HSFA6B	heat shock transcription factor A6B
Glyma.12G019300.1	457.507	357.097	352.519	314.093	271.83	235.334	425.798	420.499	364.958	-0.560596	-0.507051	0.0535458	PF05348	PTHR12828	KOG3061		K11599		AT1G67250.1		Proteasome maturation factor UMP1
Glyma.07G134600.1	20.2886	28.7209	18.6002	40.4164	52.8853	50.0484	37.7164	16.7455	26.0044	0.833086	1.08424	0.251153	PF00097,PF06547	PTHR22763	KOG0320			GO:0046872,GO:0008270,GO:0005515	AT2G39720.1	RHC2A	RING-H2 finger C2A
Glyma.02G222000.1	120.717	97.6512	121.344	98.1542	105.771	104.356	52.6044	105.125	67.2528	0.454437	-0.14007	-0.594506	PF00892					GO:0016020	AT1G09380.1		nodulin MtN21 /EamA-like transporter family protein
Glyma.13G290000.1	34.4906	69.8876	49.6007	56.583	40.1928	56.4375	62.5298	63.2609	63.666	-0.306326	-0.00719047	0.299135	PF07847	PTHR22966	KOG4281	1.13.11.19	K10712	GO:0047800,GO:0055114	AT2G42670.1		Protein of unknown function (DUF1637)
Glyma.16G149300.1	1839.16	2156.94	1539.39	500.009	379.716	386.544	1363.74	1063.34	1082.32	-1.47064	-2.12813	-0.657485	PF00067	PTHR24298:SF44,PTHR24298	KOG0156	1.14.-.-	K00517	GO:0005506,GO:0009055,GO:0016705,GO:0020037,GO:0055114	AT4G37330.1	CYP81D4	cytochrome P450, family 81, subfamily D, polypeptide 4
Glyma.17G033600.1	106.515	123.5	114.259	139.725	153.367	153.34	93.2984	112.567	139.886	0.368707	0.374886	0.00617876	PF00285,PF00549	PTHR26330	KOG1254	2.3.3.8	K01648	GO:0046912,GO:0044262,GO:0003824,GO:0008152	AT3G06650.1	ACLB-1	ATP-citrate lyase B-1
Glyma.08G152400.1	453.45	754.403	638.608	572.758	728.759	794.385	586.589	472.596	616.035	0.323221	0.182808	-0.140412	PF05303	PTHR12601	KOG1839				AT3G52140.2		tetratricopeptide repeat (TPR)-containing protein
Glyma.11G176200.1	3.04329	4.78682	0.885726	3.46426	1.05771	1.06486	7.94029	0.930307	0.896704	-0.80593	-0.641609	0.164321	PF01964				K03147	GO:0051536,GO:0009228	AT2G29630.1	PY,THIC	thiaminC
Glyma.16G197700.1	113.616	114.884	139.945	144.344	194.618	162.923	82.3805	103.264	117.468	0.727504	0.445911	-0.281593	PF03171	PTHR10209:SF55,PTHR10209	KOG0143			GO:0016491,GO:0016706,GO:0055114	AT1G06620.1		2-oxoglutarate (2OG) and Fe(II)-dependent oxygenase superfamily protein
Glyma.20G094600.1	147.092	147.434	135.516	73.9043	80.3856	85.1887	147.888	156.292	121.952	-0.831401	-0.844582	-0.0131813	PF05832	PTHR13019	KOG3195			GO:0016021	AT1G09330.1
Glyma.19G240700.1	16.2309	24.8915	21.2574	19.6308	14.8079	14.908	18.8582	26.0486	11.6571	-0.196928	-0.338123	-0.141196	PF08389	PTHR11223,PTHR11223:SF3			K14289		AT3G05040.1	HST,HST1	ARM repeat superfamily protein
Glyma.07G063600.1	181.583	290.082	185.117	15.0118	24.3272	29.8161	117.119	162.804	155.13	-2.65328	-3.2475	-0.594222	PF00931		KOG4658			GO:0043531	AT4G26090.1	RPS2	NB-ARC domain-containing disease resistance protein
Glyma.04G215200.1	128.832	64.1434	69.9724	60.0473	50.7699	80.9293	98.2611	93.0307	96.844	-0.587549	-0.455579	0.13197		PTHR13902:SF39,PTHR13902					AT3G18750.1	ATWNK6,WNK6,ZIK5	with no lysine (K) kinase 6
Glyma.19G100500.1	76.0822	36.3799	56.6865	101.618	169.233	112.875	71.4626	94.8913	86.0836	0.604152	1.18179	0.577636							AT1G12830.1
Glyma.08G302300.1	2.02886	13.4031	5.31436	6.92853	5.28853	6.38915	7.94029	3.72123	8.96704	-0.148858	-0.157071	-0.00821278	PF01535	PTHR24015					AT3G49710.1		Pentatricopeptide repeat (PPR) superfamily protein
Glyma.04G066800.1	53.7647	32.5504	27.4575	24.2499	23.2695	31.9458	37.7164	30.7001	25.1077	-0.235018	-0.517759	-0.282742	PF06886						AT4G32330.2		TPX2 (targeting protein for Xklp2) protein family
Glyma.13G075700.1	38.5483	32.5504	38.9719	81.9876	62.4046	77.7347	98.2611	92.1004	69.9429	-0.228815	1.01295	1.24177	PF00234						AT3G43720.1		Bifunctional inhibitor/lipid-transfer protein/seed storage 2S albumin superfamily protein
Glyma.13G313600.1	124.775	239.341	190.431	290.998	326.831	291.771	253.097	142.337	224.176	0.553874	0.713923	0.16005	PF03168						AT2G27260.1		Late embryogenesis abundant (LEA) hydroxyproline-rich glycoprotein family
Glyma.05G152900.1	138.977	157.008	126.659	337.188	402.986	424.879	147.888	173.967	184.721	1.20154	1.46288	0.261339	PF00630,PF00076	PTHR13833,PTHR13833:SF15	KOG4676			GO:0003676	AT3G23900.1		RNA recognition motif (RRM)-containing protein
Glyma.08G087600.1	1325.86	2782.1	1911.4	1737.91	1595.02	2112.68	1687.31	1551.75	2022.96	0.049474	-0.144517	-0.193991	PF06012,PF00632,PF06025,PF00627	PTHR11254,PTHR11254:SF124	KOG0939	6.3.2.19	K10592	GO:0005515,GO:0004842	AT1G55860.2	UPL1	ubiquitin-protein ligase 1
Glyma.08G201600.1	200.857	186.686	154.116	301.391	340.581	329.041	234.238	290.256	277.978	0.27504	0.842106	0.567066	PF00069	PTHR11909,PTHR11909:SF20	KOG1164			GO:0004672,GO:0005524,GO:0006468	AT2G25760.1		Protein kinase family protein
Glyma.03G256500.1	465.623	654.837	630.637	742.507	939.243	746.466	880.379	689.358	1041.07	-0.104601	0.471638	0.576238	PF00201	PTHR11926,PTHR11926:SF15	KOG1192	2.4.1.218	K08237	GO:0016758,GO:0008152	AT4G01070.1	GT72B1,UGT72B1	UDP-Glycosyltransferase superfamily protein
Glyma.11G122500.1	19.2741	28.7209	31.8861	12.7023	40.1928	40.4646	29.7761	40.0032	17.0374	0.104829	0.224944	0.120116	PF00501	PTHR24096	KOG1256	6.2.1.3	K01897	GO:0003824,GO:0008152	AT1G49430.1	LACS2,LRD2	long-chain acyl-CoA synthetase 2
Glyma.08G317600.1	5.07214	3.82946	0.885726	2.30951	1.05771	3.19458	0.992536	0.930307	0.896704	1.21863	-0.576825	-1.79545	PF00249	PTHR10641,PTHR10641:SF30	KOG0048		K09422	GO:0003682	AT4G26930.1	AtMYB97,MYB97	myb domain protein 97
Glyma.04G150600.1	3.04329	1.91473	1.77145	5.77377	2.11541	2.12972	1.98507	0.930307	0.896704	1.39407	0.57416	-0.819913							ATCG00170.1		DNA-directed RNA polymerase family protein
Glyma.16G071400.1	37.5339	26.8062	17.7145	32.3331	25.3849	35.1404	22.8283	13.9546	8.96704	1.02126	0.178449	-0.842813
Glyma.01G041200.1	2.02886	0.957365	5.31436	1.15475	1.05771	1.06486	7.94029	15.8152	5.38022	-3.1522	-1.3407	1.81151	PF00085	PTHR10438	KOG0907			GO:0045454	AT5G39950.1	ATH2,ATTRX2,ATTRXH2,TRX2,TRXH2	thioredoxin 2
Glyma.03G250700.1	406.786	209.663	259.518	211.32	172.406	202.323	299.746	258.625	311.156	-0.569209	-0.579854	-0.0106441	PF11833						AT1G08640.1	CJD1	Chloroplast J-like domain 1
Glyma.15G259600.1	76.0822	63.1861	64.658	72.7496	64.52	50.0484	58.5596	44.6548	59.1824	0.205966	-0.122558	-0.328524	PF02536	PTHR13068:SF3,PTHR13068					AT2G36000.1		Mitochondrial transcription termination factor family protein
Glyma.11G089400.1	67.9667	53.6124	38.0862	19.6308	13.7502	30.8809	14.888	36.282	22.4176	-0.195499	-1.31302	-1.11752	PF09379,PF00784,PF00225,PF00373	PTHR24115:SF172,PTHR24115	KOG0239			GO:0003777,GO:0005524,GO:0008017,GO:0007018,GO:0005856	AT5G65930.2	KCBP,PKCBP,ZWI	kinesin-like calmodulin-binding protein (ZWICHEL)
Glyma.13G166100.1	153.179	165.624	158.545	158.201	144.906	165.053	161.783	142.337	145.266	0.059046	-0.0280384	-0.0870844	PF03822,PF00069	PTHR24344,PTHR24344:SF45	KOG0583			GO:0004672,GO:0005524,GO:0006468,GO:0007165	AT5G35410.1	ATSOS2,CIPK24,SNRK3.11,SOS2	Protein kinase superfamily protein
Glyma.02G114100.1	1.01443	4.78682	1.77145	23.0951	26.4426	15.9729	2.97761	15.8152	2.69011	1.60854	3.11285	1.50431
Glyma.03G056000.1	54227.3	32990.8	38931.2	67485	56837.9	50760.8	24231.8	21474.3	20373.1	1.40578	0.472913	-0.932865	PF00477						AT2G40170.1	ATEM6,EM6,GEA6	Stress induced protein
Glyma.17G013600.1	2320	3176.54	2674.01	4011.62	5140.45	4575.7	6527.91	6294.46	5852.79	-0.444023	0.748593	1.19262	PF00141			1.11.1.7	K00430	GO:0004601,GO:0020037,GO:0006979,GO:0055114	AT4G21960.1	PRXR1	Peroxidase superfamily protein
Glyma.20G178200.1	138.977	150.306	138.173	202.082	200.964	154.405	147.888	148.849	149.75	0.320228	0.383067	0.0628399	PF11712						AT5G52980.1
Glyma.08G064500.1	21.303	17.2326	19.486	11.5475	4.23082	11.7135	8.93282	9.30307	16.1407	-0.322423	-1.07759	-0.755163	PF07690	PTHR24003:SF111,PTHR24003	KOG1330			GO:0005215,GO:0006810,GO:0016020,GO:0055085,GO:0016021	AT5G64500.1		Major facilitator superfamily protein
Glyma.13G342800.1	111.587	144.562	128.43	99.3089	132.213	144.821	172.701	193.504	198.172	-0.58461	-0.0312339	0.553377	PF02894,PF01408	PTHR22604,PTHR22604:SF47	KOG2742			GO:0016491,GO:0008152,GO:0055114	AT3G20790.1		NAD(P)-binding Rossmann-fold superfamily protein
Glyma.05G157100.1	10.1443	4.78682	8.85726	9.23804	13.7502	6.38915	6.94775	3.72123	5.38022	0.872203	0.304449	-0.567755							AT1G75388.1	CPuORF5	conserved peptide upstream open reading frame 5
Glyma.05G174500.1	9.12986	0.957365	6.20008	4.61902	1.05771	10.6486	4.96268	4.65154	1.79341	0.517113	0.00336295	-0.51375
Glyma.14G075000.1	150.135	247.957	243.575	314.093	336.35	330.106	218.358	269.789	280.668	0.350954	0.611765	0.260811	PF04055,PF00258,PF08608	PTHR13930	KOG1160			GO:0010181,GO:0016491,GO:0003824,GO:0051536	AT1G75200.1		flavodoxin family protein / radical SAM domain-containing protein
Glyma.12G205900.1	5.07214	4.78682	4.42863	1.15475	1.05771	1.06486	6.94775	4.65154	4.48352	-2.29493	-2.12418	0.170756	PF00155	PTHR11751,PTHR11751:SF28	KOG0259	2.6.1.5	K00815	GO:0030170,GO:0009058,GO:0016829,GO:0006520	AT5G36160.1		Tyrosine transaminase family protein
Glyma.10G050700.1	557.936	365.713	419.834	237.879	225.291	201.258	439.693	538.648	401.723	-1.05455	-1.01579	0.0387575	PF04689					GO:0003677,GO:0006355,GO:0005634	AT2G37120.1		S1FA-like DNA-binding protein
Glyma.08G107700.1	135.933	214.45	193.088	254.046	284.523	324.782	187.589	146.989	208.932	0.667641	0.667743	0.000101883	PF00069,PF00560,PF08263	PTHR24420	KOG1187			GO:0004672,GO:0005524,GO:0006468,GO:0005515	AT3G23750.1		Leucine-rich repeat protein kinase family protein
Glyma.02G059800.1	444.32	457.62	443.749	270.213	246.445	291.771	361.283	370.262	389.169	-0.471225	-0.735151	-0.263926	PF03224,PF11698	PTHR10698	KOG2759	3.6.3.14	K02144	GO:0046961,GO:0015991,GO:0000221,GO:0016820	AT3G42050.1		vacuolar ATP synthase subunit H family protein
Glyma.16G067300.1	4.05771	0.957365	1.77145	5.77377	3.17312	2.12972	0.992536	2.79092	1.79341	0.98999	0.70677	-0.28322
Glyma.05G105100.1	9.12986	14.3605	9.74299	10.3928	7.40394	8.51887	3.97014	7.44246	4.48352	0.727244	-0.336712	-1.06396	PF02181	PTHR23213					AT5G67470.1	ATFH6,FH6	formin homolog 6
Glyma.20G144700.1	95.3563	81.376	69.0866	63.5115	87.7896	64.9564	78.4103	109.776	74.4264	-0.280188	-0.184846	0.0953423	PF02531				K02692	GO:0015979,GO:0009522,GO:0009538	AT1G03130.1	PSAD-2	photosystem I subunit D-2
Glyma.18G092700.1	5856.3	5154.45	5467.59	6218.35	5673.53	5457.4	4623.23	4580.83	4655.69	0.323975	0.0743061	-0.249669	PF04078	PTHR12262	KOG3036		K12606		AT3G20800.1		Cell differentiation, Rcd1-like protein
Glyma.07G042000.1	212.016	295.826	262.175	146.654	196.733	170.377	268.977	305.141	295.912	-0.759958	-0.583781	0.176177	PF04121	PTHR13003,PTHR13003:SF2			K14301	GO:0006810,GO:0005643	AT3G14120.3
Glyma.07G087200.1	19.2741	11.4884	15.9431	16.1666	10.5771	8.51887	18.8582	12.094	8.96704	-0.178949	-0.405461	-0.226512	PF06376						AT5G53250.1	AGP22,ATAGP22	arabinogalactan protein 22
Glyma.05G031200.1	1.01443	0.957365	0.885726	5.77377	1.05771	2.12972	1.98507	3.72123	0.896704	0.440569	1.64893	1.20836	PF07995	PTHR19328:SF13,PTHR19328				GO:0016901,GO:0048038,GO:0005975	AT1G74790.1		catalytics
Glyma.U003100.1	23.3319	4.78682	8.85726	16.1666	19.0387	8.51887	6.94775	5.58184	8.07033	1.08579	0.241843	-0.843948							AT4G10720.1		Ankyrin repeat family protein
Glyma.08G367700.1	29.4184	7.65892	11.5144	34.6426	25.3849	41.5295	22.8283	17.6758	17.0374	0.819615	1.06351	0.243891	PF01702	PTHR11962				GO:0008479,GO:0006400,GO:0008616
Glyma.05G037400.1	722.273	584.95	635.066	816.412	743.567	737.947	629.268	609.351	596.308	0.32461	0.242575	-0.0820349	PF04695	PTHR23058	KOG2629				AT5G62810.1	ATPEX14,PED2,PEX14	peroxin 14
Glyma.20G145200.1	6.08657	9.57365	13.2859	4.61902	9.51935	4.25944	8.93282	15.8152	8.96704	-0.87386	-0.653836	0.220025	PF01179,PF02728,PF02727	PTHR10638:SF12,PTHR10638	KOG1186			GO:0005507,GO:0008131,GO:0048038,GO:0009308,GO:0055114	AT1G31690.1		Copper amine oxidase family protein
Glyma.16G016400.1	3.04329	2.87209	4.42863	1.15475	5.28853	2.12972	2.97761	3.72123	0.896704	0.174648	-0.270923	-0.445571	PF02365					GO:0003677,GO:0006355	AT3G49530.1	ANAC062,NAC062,NTL6	NAC domain containing protein 62
Glyma.07G254600.1	16.2309	15.3178	17.7145	5.77377	15.8656	13.8432	76.4253	117.219	80.7033	-2.95082	-0.473402	2.47742	PF00201	PTHR11926,PTHR11926:SF15	KOG1192			GO:0016758,GO:0008152	AT2G36770.1		UDP-Glycosyltransferase superfamily protein
Glyma.09G229700.1	17.2453	5.74419	22.1432	11.5475	7.40394	10.6486	0.992536	19.5365	23.3143	-0.566755	-0.60857	-0.0418149	PF01920					GO:0051082,GO:0006457,GO:0016272	AT1G29990.1	PFD6	prefoldin 6
Glyma.07G024900.1	3.04329	8.61628	4.42863	3.46426	4.23082	6.38915	5.95522	2.79092	1.79341	0.418269	-0.191921	-0.61019
Glyma.15G002900.1	42.606	66.0582	35.429	16.1666	30.6735	19.1675	31.7611	40.9335	37.6616	-0.741466	-1.1263	-0.384834	PF00069	PTHR24420,PTHR24420:SF440	KOG0198			GO:0004672,GO:0005524,GO:0006468	AT1G80870.1		Protein kinase superfamily protein
Glyma.05G104000.1	4.05771	4.78682	5.31436	5.77377	2.11541	1.06486	0.992536	1.86061	0.896704	1.2557	-0.661097	-1.9168	PF03000	PTHR13690:SF174,PTHR13690					AT5G67385.1		Phototropic-responsive NPH3 family protein
Glyma.06G024700.1	7.101	4.78682	7.08581	15.0118	7.40394	9.58373	3.97014	0.930307	4.48352	1.76978	0.754053	-1.01573	PF05701						AT1G75720.2		Plant protein of unknown function (DUF827)
Glyma.07G107700.1	906.899	1120.12	1076.16	1923.82	1955.7	1833.69	1315.11	1305.22	1577.3	0.444725	0.880556	0.435832	PF00076,PF08662	PTHR14068	KOG2314		K03253	GO:0003676	AT5G27640.1	ATEIF3B-1,ATTIF3B1,EIF3B,EIF3B-1,TIF3B1	translation initiation factor 3B1
Glyma.10G040200.1	95.3563	62.2287	71.7438	66.9758	108.944	79.8644	158.806	130.243	173.961	-0.856116	0.157508	1.01362		PTHR12504					AT5G43970.1	ATTOM22-V,TOM22-V,TOM9-2	translocase of outer membrane 22-V
Glyma.16G069400.1	17.2453	20.1047	23.9146	81.9876	64.52	66.0213	32.7537	23.2577	18.8308	1.50574	1.79453	0.288798	PF05148	PTHR12787	KOG3045			GO:0008168,GO:0008152	AT5G40530.1		S-adenosyl-L-methionine-dependent methyltransferases superfamily protein
Glyma.01G122200.1	1.01443	3.82946	1.77145	3.46426	6.34623	8.51887	2.97761	0.930307	0.896704	1.93166	1.47027	-0.461393		PTHR14068					AT5G27640.1	ATEIF3B-1,ATTIF3B1,EIF3B,EIF3B-1,TIF3B1	translation initiation factor 3B1
Glyma.06G314200.1	5.07214	4.78682	2.65718	45.0354	49.7122	56.4375	44.6641	37.2123	38.5583	0.328066	3.59445	3.26639	PF01095,PF04043	PTHR22931,PTHR22931:SF5		3.1.1.11	K01051	GO:0030599,GO:0042545,GO:0005618,GO:0004857	AT5G04970.1		Plant invertase/pectin methylesterase inhibitor superfamily
Glyma.08G036300.1	27.3896	20.1047	27.4575	25.4046	28.5581	14.908	37.7164	39.0729	38.5583	-0.744025	-0.122072	0.621953	PF00575	PTHR11741				GO:0003723	AT4G29060.1	emb2726	elongation factor Ts family protein
Glyma.06G196600.1	13.1876	8.61628	16.8288	4.61902	9.51935	9.58373	4.96268	22.3274	11.6571	-0.715288	-0.703589	0.0116991	PF00097,PF02190	PTHR23327				GO:0046872,GO:0004176,GO:0006508,GO:0005515,GO:0008270	AT1G18660.1		zinc finger (C3HC4-type RING finger) family protein
Glyma.01G031400.1	292.155	233.597	198.403	807.174	867.319	841.239	367.238	452.129	308.466	1.15742	1.79661	0.639184	PF01480,PF00076	PTHR18806:SF4,PTHR18806	KOG2253		K12822	GO:0003676,GO:0006397	AT1G60200.1		splicing factor PWI domain-containing protein / RNA recognition motif (RRM)-containing protein
Glyma.16G016000.1	83.1832	106.267	108.944	63.5115	28.5581	53.243	60.5447	69.7731	63.666	-0.416776	-1.03806	-0.621288	PF00149		KOG1432			GO:0016787	AT5G63140.1	ATPAP29,PAP29	purple acid phosphatase 29
Glyma.09G171100.1	78.111	89.9923	73.5153	71.5948	70.8663	85.1887	39.7014	50.2366	50.2154	0.699809	-0.0859151	-0.785724	PF00249					GO:0003682	AT5G16560.1	KAN,KAN1	Homeodomain-like superfamily protein
Glyma.04G182900.1	93.3274	116.798	90.3441	57.7377	70.8663	91.5779	76.4253	101.403	57.389	-0.0953014	-0.448525	-0.353224	PF02260,PF02259,PF00454	PTHR11139,PTHR11139:SF3		2.7.11.1	K04728	GO:0016773,GO:0005515	AT3G48190.1	ATATM,ATM	ataxia-telangiectasia mutated
Glyma.03G217400.1	76.0822	60.314	69.9724	54.2735	44.4236	42.5944	85.3581	78.1458	54.6989	-0.626995	-0.546548	0.0804471	PF00804,PF05739	PTHR19957:SF57,PTHR19957	KOG0809			GO:0016020,GO:0005515	AT3G05710.1	ATSYP43,SYP43	syntaxin of plants 43
Glyma.19G207500.1	201.871	132.116	124.887	211.32	220.003	233.204	170.716	170.246	177.547	0.357957	0.534227	0.17627	PF02338	PTHR12419	KOG2606				AT3G62940.2		Cysteine proteinases superfamily protein
Glyma.09G048000.1	11.1587	7.65892	9.74299	2.30951	16.9233	14.908	3.97014	5.58184	6.27693	1.10894	0.257471	-0.851465
Glyma.01G092100.1	51.7359	39.252	54.0293	62.3568	70.8663	44.7241	44.6641	39.0729	47.5253	0.438996	0.295225	-0.14377	PF05180	PTHR20922,PTHR20922:SF13				GO:0008270	AT1G68730.1		Zim17-type zinc finger protein
Glyma.11G041600.1	115.645	104.353	96.5441	401.855	337.408	289.642	100.246	136.755	134.506	1.46965	1.70064	0.230993	PF03372	PTHR11200:SF29,PTHR11200	KOG0565				AT4G18010.2	5PTASE2,AT5PTASE2,IP5PII	myo-inositol polyphosphate 5-phosphatase 2
Glyma.11G146500.1	8.11543	7.65892	5.31436	5.77377	7.40394	7.45401	2.97761	4.65154	1.79341	1.13067	-0.0316058	-1.16228	PF00230	PTHR19139,PTHR19139:SF27	KOG0223		K09872	GO:0005215,GO:0006810,GO:0016020	AT5G60660.1	PIP2;4,PIP2F	plasma membrane intrinsic protein 2;4
Glyma.01G223800.1	23.3319	23.9341	16.8288	18.4761	12.6925	17.0377	52.6044	42.7941	40.3517	-1.49366	-0.410985	1.08268							AT1G64185.1		Lactoylglutathione lyase / glyoxalase I family protein
Glyma.16G201000.1	5.07214	2.87209	1.77145	2.30951	6.34623	4.25944	2.97761	3.72123	7.17363	-0.103157	0.410679	0.513836	PF07859	PTHR23024,PTHR23024:SF10				GO:0016787,GO:0008152,GO:0047746,GO:0015996	AT5G62180.1	AtCXE20,CXE20	carboxyesterase 20
Glyma.04G061000.1	34.4906	62.2287	31.8861	6.92853	20.0964	20.2323	83.373	101.403	97.7407	-2.57973	-1.44434	1.13539	PF04565,PF04563,PF04560,PF00562,PF04567,PF04566,PF04561	PTHR20856,PTHR20856:SF6	KOG0214			GO:0003677,GO:0003899,GO:0006351	AT3G23780.1	DMS2,DRD2,NRPD2,NRPD2A,NRPE2	nuclear RNA polymerase D2A
Glyma.18G166800.1	139.991	131.159	115.144	90.0709	62.4046	83.059	144.91	140.476	141.679	-0.85852	-0.713763	0.144757	PF05627						AT3G25070.1	RIN4	RPM1 interacting protein 4
Glyma.06G006800.1	6.08657	2.87209	6.20008	16.1666	20.0964	9.58373	17.8656	34.4214	5.38022	-0.330934	1.59667	1.9276	PF02519				K14488		AT5G18060.1		SAUR-like auxin-responsive protein family
Glyma.13G151300.1	84.1976	76.5892	86.8012	113.166	141.733	123.524	178.656	160.013	165.89	-0.415028	0.612056	1.02708	PF04427	PTHR12728	KOG3031				AT3G23620.1		Ribosomal RNA processing Brix domain protein
Glyma.08G195000.1	12.1731	4.78682	11.5144	33.4879	16.9233	25.5566	5.95522	16.7455	18.8308	0.871181	1.41572	0.544541	PF06888	PTHR20889	KOG3120			GO:0016791	AT1G17710.1		Pyridoxal phosphate phosphatase-related protein
Glyma.10G243200.1	120.717	69.8876	91.2298	49.6545	41.2505	38.3349	146.895	136.755	104.914	-1.5881	-1.1248	0.463307	PF08423	PTHR22942,PTHR22942:SF13	KOG1434		K10872	GO:0003697,GO:0005524,GO:0006281,GO:0009432	AT3G22880.1	ARLIM15,ATDMC1,DMC1	DNA repair (Rad51) family protein
Glyma.06G057200.1	8.11543	6.70155	7.08581	5.77377	2.11541	3.19458	23.8209	16.7455	20.6242	-2.46486	-0.982667	1.48219	PF00561	PTHR10992:SF163,PTHR10992	KOG1454				AT5G21950.1		alpha/beta-Hydrolases superfamily protein
Glyma.09G034800.1	98.3996	117.756	99.2013	116.63	118.463	128.848	107.194	87.4489	77.1165	0.421376	0.206721	-0.214656	PF00481	PTHR13832,PTHR13832:SF97	KOG0700			GO:0003824	AT3G17090.1		Protein phosphatase 2C family protein
Glyma.05G115700.1	1074.28	1180.43	1242.67	1599.34	1281.94	1258.66	1279.38	1018.69	1401.55	0.162235	0.243333	0.0810981	PF07002	PTHR10857	KOG4172				AT5G14420.1	RGLG2	RING domain ligase2
Glyma.15G124300.1	4.05771	13.4031	3.5429	5.77377	11.6348	11.7135	12.903	15.8152	10.7604	-0.438963	0.471464	0.910427							AT5G03110.1
Glyma.15G055400.1	2.02886	0.957365	0.885726	1.15475	1.05771	2.12972	5.95522	2.79092	1.79341	-1.27932	0.165359	1.44468	PF05627						AT5G19473.1		RPM1-interacting protein 4 (RIN4) family protein
Glyma.09G146000.1	2.02886	1.91473	1.77145	1.15475	2.11541	1.06486	1.98507	1.86061	0.896704	-0.129574	-0.398723	-0.269149							AT5G62090.1	SLK2	SEUSS-like 2
Glyma.18G116800.1	13.1876	19.1473	14.1716	4.61902	4.23082	6.38915	19.8507	21.3971	11.6571	-1.79563	-1.60966	0.18597	PF00560,PF08263,PF00069	PTHR24420,PTHR24420:SF516	KOG1187			GO:0004672,GO:0005524,GO:0006468,GO:0005515	AT4G20270.1	BAM3	Leucine-rich receptor-like protein kinase family protein
Glyma.08G304300.1	896.755	1279.04	1150.56	1913.43	1801.27	1779.38	847.626	711.685	850.075	1.18921	0.723937	-0.465276	PF00400	PTHR22838	KOG0293			GO:0005515	AT5G08560.1		transducin family protein / WD-40 repeat family protein
Glyma.18G193700.1	1.01443	3.82946	0.885726	1.15475	1.05771	1.06486	0.992536	1.86061	0.896704	-0.194318	-0.805922	-0.611603							AT2G37960.1
Glyma.06G161200.1	81.1543	102.438	103.63	76.2138	130.098	90.513	80.3954	112.567	78.9099	0.12668	0.0474432	-0.0792373	PF00036,PF00069	PTHR24349:SF13,PTHR24349	KOG0032	2.7.11.1	K13412	GO:0005509,GO:0004672,GO:0005524,GO:0006468,GO:0016773,GO:0009103,GO:0016020	AT4G09570.1	ATCPK4,CPK4	calcium-dependent protein kinase 4
Glyma.15G052300.1	258.679	245.085	224.974	458.438	382.889	439.787	177.664	175.828	192.791	1.22968	0.813924	-0.415753	PF07228	PTHR12320	KOG1379			GO:0003824	AT4G33500.1		Protein phosphatase 2C family protein
Glyma.04G247200.1	99.414	130.202	103.63	170.904	202.022	166.118	109.179	126.522	108.501	0.647147	0.693816	0.0466694	PF00249,PF04433	PTHR12802,PTHR12802:SF21	KOG1279		K11649	GO:0003682,GO:0005515	AT1G21700.1	ATSWI3C,CHB4,SWI3C	SWITCH/sucrose nonfermenting 3C
Glyma.20G171000.1	85.212	93.8217	90.3441	147.809	155.483	121.394	139.948	98.6126	106.708	0.298678	0.656763	0.358085							AT1G71730.1
Glyma.05G144200.1	69.9956	74.6744	64.658	72.7496	57.1161	43.6592	96.276	85.5883	75.3231	-0.567677	-0.270623	0.297054							AT5G12230.1	MED19A
Glyma.09G200500.1	3.04329	9.57365	10.6287	16.1666	6.34623	10.6486	40.694	30.7001	27.7978	-1.58072	0.512544	2.09326	PF00676,PF02779,PF02780	PTHR11624,PTHR11624:SF20	KOG0523			GO:0016624,GO:0008152,GO:0003824,GO:0008661,GO:0016114	AT4G15560.1	CLA,CLA1,DEF,DXPS2,DXS	Deoxyxylulose-5-phosphate synthase
Glyma.13G041000.1	2.02886	10.531	7.97153	3.46426	3.17312	4.25944	3.97014	0.930307	0.896704	0.91049	-0.913925	-1.82442							AT5G53220.1
Glyma.02G031800.1	1.01443	2.87209	1.77145	1.15475	1.05771	2.12972	0.992536	0.930307	1.79341	0.224571	-0.381867	-0.606438	PF03005	PTHR13533,PTHR13533:SF3					AT1G70230.1	TBL27	TRICHOME BIREFRINGENCE-LIKE 27
Glyma.08G179000.1	138.977	88.0776	102.744	113.166	119.521	120.329	105.209	101.403	94.1539	0.23109	0.0981478	-0.132942	PF00403	PTHR24093,PTHR24093:SF150				GO:0046872,GO:0030001	AT4G33520.1	HMA6,PAA1	P-type ATP-ase 1
Glyma.08G118900.1	39.5627	49.783	40.7434	8.08328	13.7502	11.7135	30.7686	44.6548	27.7978	-1.62149	-1.95525	-0.333761	PF02798,PF00043	PTHR11260:SF16,PTHR11260	KOG0406			GO:0005515	AT2G29420.1	ATGSTU7,GST25,GSTU7	glutathione S-transferase tau 7
Glyma.02G242000.1	215.059	189.558	167.402	362.593	317.312	333.301	249.127	251.183	203.552	0.525564	0.824791	0.299227	PF05603	PTHR12925	KOG4067				AT1G66080.1
Glyma.15G053600.1	141.006	221.151	195.745	264.439	178.752	204.453	201.485	187.922	246.594	0.0261735	0.215189	0.189015	PF00612,PF03859,PF00023	PTHR23335	KOG0520			GO:0005515,GO:0003677,GO:0005634	AT5G64220.1		Calmodulin-binding transcription activator protein with CG-1 and Ankyrin domains
Glyma.03G018200.1	169.41	105.31	149.688	158.201	144.906	119.264	156.821	167.455	175.754	-0.243503	-0.00693808	0.236565							AT3G25270.1		Ribonuclease H-like superfamily protein
Glyma.11G003100.1	3.04329	3.82946	3.5429	2.30951	1.05771	4.25944	2.97761	1.86061	2.69011	0.0187193	-0.449631	-0.46835							AT4G21215.2
Glyma.20G157500.1	84.1976	90.9497	71.7438	34.6426	63.4623	66.0213	110.171	103.264	141.679	-1.11348	-0.589069	0.524411		PTHR23125:SF101,PTHR23125					AT3G48880.1		RNI-like superfamily protein
Glyma.05G242600.1	39.5627	47.8682	30.1147	31.1784	24.3272	25.5566	17.8656	17.6758	20.6242	0.529341	-0.536119	-1.06546	PF03168						AT1G45688.1
Glyma.08G309700.1	1.01443	1.91473	0.885726	1.15475	1.05771	1.06486	0.992536	10.2334	0.896704	-1.88711	-0.219123	1.66799							AT2G42840.1	PDF1	protodermal factor 1
Glyma.09G112100.1	546.777	397.306	486.264	1967.7	1379.25	1343.85	1198.98	907.05	978.304	0.604874	1.71347	1.1086	PF03760					GO:0009790	AT5G06760.1	LEA4-5	Late Embryogenesis Abundant 4-5
Glyma.09G233800.1	1.01443	1.91473	0.885726	3.46426	5.28853	4.25944	12.903	10.2334	2.69011	-0.988982	1.77016	2.75914	PF00847					GO:0003700,GO:0006355	AT5G11590.1	TINY2	Integrase-type DNA-binding superfamily protein
Glyma.03G221200.1	398.67	542.826	533.207	699.781	694.913	668.732	463.514	429.802	535.332	0.53039	0.484617	-0.0457739	PF00271,PF07717,PF00270,PF04408	PTHR18934	KOG0925	3.6.4.13	K12820	GO:0003676,GO:0005524,GO:0008026,GO:0004386	AT3G62310.1		RNA helicase family protein
Glyma.17G135700.1	241.434	177.112	193.088	212.475	151.252	198.064	144.91	186.992	182.031	0.128453	-0.122638	-0.251091
Glyma.11G061800.1	4.05771	8.61628	11.5144	9.23804	12.6925	8.51887	9.92536	13.0243	8.07033	-0.0267857	0.332095	0.358881							AT2G23690.1
Glyma.07G129100.1	1.01443	0.957365	0.885726	1.15475	1.05771	1.06486	2.97761	0.930307	0.896704	-0.551906	0.197753	0.749659	PF00335	PTHR19282,PTHR19282:SF137				GO:0016021	AT2G19580.1	TET2	tetraspanin2
Glyma.04G170500.1	15.2164	20.1047	20.3717	20.7856	22.2118	10.6486	14.888	21.3971	21.5209	-0.107749	-0.0540201	0.0537286	PF03171	PTHR10209	KOG0143			GO:0016491,GO:0016706,GO:0055114	AT3G19000.1		2-oxoglutarate (2OG) and Fe(II)-dependent oxygenase superfamily protein
Glyma.17G072100.1	41.5916	57.4419	82.3725	55.4282	56.0584	68.151	55.582	53.0275	50.2154	0.177652	-0.0141326	-0.191785	PF01535	PTHR24015,PTHR24015:SF145					AT4G30700.1		Pentatricopeptide repeat (PPR) superfamily protein
Glyma.05G243300.1	12.1731	12.4457	4.42863	3.46426	5.28853	2.12972	1.98507	7.44246	1.79341	-0.0441818	-1.4164	-1.37222							AT1G18060.1
Glyma.11G089800.1	18.2597	14.3605	12.4002	3.46426	6.34623	7.45401	9.92536	4.65154	17.0374	-0.872766	-1.38277	-0.510002	PF00892		KOG1582			GO:0016020	AT4G19185.1		nodulin MtN21 /EamA-like transporter family protein
Glyma.08G164800.1	59.8513	62.2287	85.9154	123.559	101.54	120.329	73.4477	61.4003	50.2154	0.900364	0.731831	-0.168533	PF01545	PTHR11562,PTHR11562:SF10	KOG1485			GO:0008324,GO:0006812,GO:0055085,GO:0016021	AT1G16310.1		Cation efflux family protein
Glyma.17G090900.1	47.6782	97.6512	202.831	411.093	214.714	240.658	35.7313	22.3274	39.455	3.15147	1.31539	-1.83608	PF00514,PF04564	PTHR23315,PTHR23315:SF31				GO:0005515,GO:0004842,GO:0016567,GO:0000151	AT1G60190.1		ARM repeat superfamily protein
Glyma.04G017100.1	2.02886	12.4457	6.20008	8.08328	7.40394	1.06486	6.94775	4.65154	5.38022	-0.0367821	-0.320852	-0.28407		PTHR26369:SF18,PTHR26369					AT2G26770.1		plectin-related
Glyma.12G183100.1	102.457	105.31	108.944	51.964	37.0197	61.7618	98.2611	100.473	90.5671	-0.940458	-1.07106	-0.130597	PF00248	PTHR11732,PTHR11732:SF7	KOG1575				AT2G27680.1		NAD(P)-linked oxidoreductase superfamily protein
Glyma.04G126600.1	77.0966	88.0776	96.5441	86.6066	69.8086	92.6427	76.4253	78.1458	78.9099	0.0931761	-0.0715334	-0.164709							AT4G10800.1
Glyma.13G098600.1	792.269	639.52	458.806	2.30951	4.23082	1.06486	187.589	202.807	190.998	-6.25639	-7.95764	-1.70125	PF00626,PF02209	PTHR11977:SF9,PTHR11977	KOG0443			GO:0003779,GO:0007010	AT4G30160.1	ATVLN4,VLN4	villin 4
Glyma.11G229500.1	7.101	5.74419	6.20008	3.46426	5.28853	7.45401	6.94775	5.58184	6.27693	-0.214633	-0.232833	-0.0181999	PF00657	PTHR14209	KOG3035			GO:0016788,GO:0006629	AT3G11210.1		SGNH hydrolase-type esterase superfamily protein
Glyma.13G051200.1	664.451	546.655	654.552	936.506	875.78	731.558	802.962	961.007	874.286	-0.0525735	0.447326	0.4999	PF01655	PTHR23413	KOG0878		K02912	GO:0003735,GO:0006412,GO:0005622,GO:0005840	AT4G18100.1		Ribosomal protein L32e
Glyma.02G088800.1	5.07214	10.531	6.20008	12.7023	16.9233	27.6863	3.97014	6.51215	8.96704	1.55911	1.39429	-0.164822	PF07722	PTHR11922,PTHR11922:SF16				GO:0016787,GO:0006541	AT5G38200.1		Class I glutamine amidotransferase-like superfamily protein
Glyma.14G159800.1	373.31	359.969	387.948	400.7	323.658	393.998	323.567	344.214	366.752	0.112401	-0.00369916	-0.1161	PF00076	PTHR11546,PTHR11546:SF16	KOG1190			GO:0003676	AT5G53180.1	ATPTB2,PTB2	polypyrimidine tract-binding protein 2
Glyma.03G060000.1	892.697	471.023	548.264	1485.01	884.242	1194.77	343.417	188.852	235.833	2.21414	0.898438	-1.3157		PTHR15067,PTHR15067:SF7	KOG1039			GO:0046872,GO:0005515,GO:0008270	AT5G01520.1		RING/U-box superfamily protein
Glyma.08G073000.1	150.135	176.155	181.574	218.249	264.426	186.35	177.664	194.434	180.237	0.276516	0.397618	0.121102	PF01783					GO:0003735,GO:0006412,GO:0015934	AT1G26740.1		Ribosomal L32p protein family
Glyma.05G232100.1	9.12986	3.82946	4.42863	1.15475	2.11541	1.06486	0.992536	0.930307	0.896704	0.620577	-2.00398	-2.62455	PF03348	PTHR10383,PTHR10383:SF2	KOG2592			GO:0016020	AT3G24460.1		Serinc-domain containing serine and sphingolipid biosynthesis protein
Glyma.09G119300.1	44.6349	53.6124	28.3432	27.7141	49.7122	25.5566	62.5298	44.6548	57.389	-0.676328	-0.297765	0.378563	PF11805
Glyma.19G082100.1	313.458	347.523	294.061	461.902	422.025	514.327	255.082	214.901	331.78	0.802378	0.549988	-0.25239	PF07819	PTHR15495:SF7,PTHR15495	KOG3724			GO:0016788,GO:0006505,GO:0006886	AT3G27325.2		hydrolases, acting on ester bonds
Glyma.01G183900.1	10.1443	4.78682	6.20008	3.46426	3.17312	4.25944	6.94775	11.1637	4.48352	-1.05209	-0.955467	0.0966266	PF03195						AT5G66870.1	ASL1,LBD36	ASYMMETRIC LEAVES 2-like 1
Glyma.13G328100.1	187.669	193.388	217.003	220.558	208.368	265.15	187.589	139.546	212.519	0.363059	0.214804	-0.148255	PF02037,PF02891	PTHR10782:SF4,PTHR10782	KOG2169			GO:0003676,GO:0008270	AT5G60410.4	ATSIZ1,SIZ1	DNA-binding protein with MIZ/SP-RING zinc finger, PHD-finger and SAP domain
Glyma.03G243100.1	326.646	431.771	400.348	288.689	246.445	268.344	438.701	453.99	504.844	-0.798553	-0.528257	0.270296	PF00483,PF02020	PTHR22572,PTHR22572:SF7	KOG1461		K03240	GO:0016779,GO:0009058,GO:0005515	AT2G34970.1		Trimeric LpxA-like enzyme
Glyma.02G203000.1	151.15	206.791	164.745	153.582	184.041	167.183	84.3656	123.731	110.295	0.66493	-0.0502145	-0.715144	PF00533,PF03031	PTHR23081				GO:0005515	AT5G58003.1	CPL4	C-terminal domain phosphatase-like 4
Glyma.11G165400.1	2.02886	0.957365	1.77145	11.5475	4.23082	6.38915	1.98507	3.72123	2.69011	1.4006	2.22012	0.819516
Glyma.12G215900.1	450.406	410.709	351.633	563.52	344.812	347.144	425.798	424.22	373.029	0.0377554	0.0499539	0.0121985	PF00467	PTHR12903	KOG1708				AT5G54600.1		Translation protein SH3-like family protein
Glyma.19G017700.1	143.034	123.5	106.287	88.9161	117.405	85.1887	88.3357	144.198	127.332	-0.303911	-0.354939	-0.0510287	PF07059						AT1G10410.1		Protein of unknown function (DUF1336)
Glyma.05G235600.1	131.876	96.6938	136.402	191.689	180.868	183.156	143.918	144.198	178.444	0.252279	0.606556	0.354277	PF01084	PTHR13479,PTHR13479:SF28				GO:0003735,GO:0006412,GO:0005622,GO:0005840	AT1G07210.1		Ribosomal protein S18
Glyma.11G112300.1	361.137	321.675	318.861	381.069	395.582	368.441	367.238	418.638	434.901	-0.0923369	0.193053	0.28539	PF01985					GO:0003723	AT2G21350.1		RNA-binding CRS1 / YhbY (CRM) domain protein
Glyma.20G085400.1	15.2164	18.1899	22.1432	39.2617	47.5968	61.7618	41.6865	56.7487	43.0418	0.0710628	1.41978	1.34872	PF00238	PTHR11761	KOG0901			GO:0003735,GO:0006412,GO:0005840	AT2G33370.1		Ribosomal protein L14p/L23e family protein
Glyma.16G127900.1	6.08657	7.65892	15.0573	1.15475	2.11541	1.06486	0.992536	1.86061	0.896704	0.209206	-2.7321	-2.9413	PF00931,PF01582	PTHR11017,PTHR11017:SF20	KOG4658			GO:0043531,GO:0005515,GO:0007165	AT5G36930.2		Disease resistance protein (TIR-NBS-LRR class) family
Glyma.12G002500.1	207.958	333.163	310.89	77.3686	115.29	94.7725	128.037	170.246	168.58	-0.699786	-1.56766	-0.86787	PF00069,PF00560,PF08263	PTHR24420:SF112,PTHR24420	KOG1187			GO:0004672,GO:0005524,GO:0006468,GO:0005515	AT1G72180.1		Leucine-rich receptor-like protein kinase family protein
Glyma.04G125200.1	2.02886	1.91473	5.31436	2.30951	8.46164	2.12972	1.98507	10.2334	3.58681	-0.292937	0.478705	0.771642	PF03398						AT4G35730.1		Regulator of Vps4 activity in the MVB pathway protein
Glyma.14G032300.1	358.093	363.799	376.434	409.938	396.64	368.441	270.962	208.389	296.809	0.598258	0.0973782	-0.50088	PF01593	PTHR10742:SF30,PTHR10742	KOG0029			GO:0050660,GO:0008033,GO:0016491,GO:0055114	AT2G43020.1	ATPAO2,PAO2	polyamine oxidase 2
Glyma.09G002100.1	145.063	125.415	82.3725	190.535	239.041	277.928	219.35	194.434	167.684	0.283038	1.00368	0.720643	PF01031,PF00169,PF00350,PF02212	PTHR11566:SF10,PTHR11566	KOG0446			GO:0005515,GO:0005543,GO:0003924,GO:0005525	AT1G59610.1	ADL3,CF1,DL3,DRP2B	dynamin-like 3
Glyma.16G004400.1	325.632	374.33	287.861	311.784	316.254	359.922	394.037	292.117	401.723	-0.13899	0.000201468	0.139192	PF00198,PF00364,PF02817	PTHR23151	KOG0557	2.3.1.12	K00627	GO:0016746,GO:0008152	AT1G54220.1		Dihydrolipoamide acetyltransferase, long form protein
Glyma.20G243800.1	1.01443	0.957365	1.77145	3.46426	6.34623	2.12972	8.93282	25.1183	8.96704	-1.84912	1.67347	3.52258							AT2G34860.1	EDA3	DnaJ/Hsp40 cysteine-rich domain superfamily protein
Glyma.14G086100.1	76.0822	61.2713	70.8581	130.487	122.694	101.162	32.7537	46.5154	62.7693	1.31887	0.767095	-0.55177	PF11523						AT3G46630.1		Protein of unknown function (DUF3223)
Glyma.10G112600.1	53.7647	73.7171	63.7723	43.8807	38.0774	51.1132	31.7611	52.0972	33.178	0.185242	-0.523291	-0.708533
Glyma.01G029100.1	184.626	140.733	156.774	83.1423	80.3856	101.162	125.06	145.128	138.092	-0.625257	-0.865127	-0.23987							AT1G10660.1
Glyma.14G004400.1	34.4906	15.3178	23.9146	12.7023	14.8079	14.908	24.8134	16.7455	12.5539	-0.351286	-0.797431	-0.446146	PF01138	PTHR11097,PTHR11097:SF5	KOG1612				AT3G07750.1		3\'-5\'-exoribonuclease family protein
Glyma.08G221600.1	5.07214	0.957365	6.20008	6.92853	3.17312	3.19458	26.7985	24.188	15.244	-2.31648	0.12064	2.43712							AT3G21150.1	BBX32	B-box 32
Glyma.02G113900.1	123.76	113.926	93.887	106.237	131.155	119.264	174.686	161.873	161.407	-0.481511	0.105208	0.586719	PF00023	PTHR24199:SF294,PTHR24199	KOG4412		K06694	GO:0005515	AT2G03430.1		Ankyrin repeat family protein
Glyma.12G007500.1	26.3751	27.7636	26.5718	11.5475	8.46164	13.8432	10.9179	48.376	26.9011	-1.34835	-1.2535	0.0948475	PF00149	PTHR22953	KOG1378			GO:0016787	AT2G16430.2	ATPAP10,PAP10	purple acid phosphatase 10
Glyma.03G238100.1	44.6349	43.0814	62.8865	481.533	532.026	538.819	187.589	213.971	177.547	1.42258	3.36566	1.94308	PF00703,PF02837,PF02836	PTHR10066,PTHR10066:SF10				GO:0004553,GO:0005975	AT1G09010.1		glycoside hydrolase family 2 protein
Glyma.20G242900.1	141.006	155.093	149.688	95.8447	135.386	127.783	171.709	160.943	173.064	-0.494286	-0.312312	0.181974	PF06807,PF03205	PTHR12755	KOG2749	2.7.1.78	K14399		AT3G04680.1	CLPS3	CLP-similar protein 3
Glyma.15G106500.1	76.0822	123.5	106.287	142.035	189.329	165.053	133.992	105.125	126.435	0.441476	0.698638	0.257162	PF01535	PTHR24015:SF20,PTHR24015					AT1G61870.1	PPR336	pentatricopeptide repeat 336
Glyma.04G176400.1	357.079	419.326	410.977	247.118	251.734	253.436	259.052	267.929	257.354	-0.0601838	-0.658427	-0.598243	PF07995	PTHR19328,PTHR19328:SF13				GO:0016901,GO:0048038,GO:0005975	AT1G74790.1		catalytics
Glyma.01G196200.1	2.02886	1.91473	0.885726	1.15475	2.11541	1.06486	1.98507	0.930307	4.48352	-0.77127	-0.155778	0.615492	PF00249	PTHR10641	KOG0048		K09422	GO:0003682	AT3G49690.1	ATMYB84,MYB84,RAX3	myb domain protein 84
Glyma.06G044800.1	12.1731	4.78682	15.0573	4.61902	2.11541	2.12972	1.98507	1.86061	0.896704	0.902368	-1.8528	-2.75517	PF00173	PTHR19359	KOG0537			GO:0020037	AT5G48810.1	ATB5-B,ATCB5-D,B5 #3,CB5-D	cytochrome B5 isoform D
Glyma.13G065000.1	643.148	641.434	610.265	433.033	369.139	362.052	724.551	642.842	643.833	-0.788707	-0.702713	0.0859941	PF01145	PTHR10264,PTHR10264:SF25	KOG2620				AT5G62740.1	ATHIR1,HIR1	SPFH/Band 7/PHB domain-containing membrane-associated protein family
Glyma.11G139800.1	53.7647	39.252	58.4579	162.82	156.54	127.783	20.8433	17.6758	41.2484	2.48687	1.56166	-0.925204	PF00022	PTHR11937,PTHR11937:SF77	KOG0676		K10355		AT3G12110.1	ACT11	actin-11
Glyma.15G201000.1	1.01443	0.957365	1.77145	3.46426	2.11541	5.3243	5.95522	1.86061	1.79341	0.18236	1.54249	1.36013							AT1G21280.1
Glyma.05G189100.1	344.906	248.915	290.518	323.331	249.619	282.188	339.447	341.423	297.706	-0.194527	-0.0484426	0.146084	PF03874	PTHR21297	KOG2351		K03012	GO:0003899,GO:0006351	AT5G09920.1	ATRPB15.9,NRPB4,RPB15.9,RPB15.9.9	RNA polymerase II, Rpb4, core protein
Glyma.13G232000.1	14.202	39.252	23.9146	31.1784	15.8656	7.45401	27.791	17.6758	20.6242	-0.278252	-0.505545	-0.227293	PF01535	PTHR24015					AT1G28690.1		Tetratricopeptide repeat (TPR)-like superfamily protein
Glyma.17G084800.1	1.01443	0.957365	1.77145	1.15475	1.05771	3.19458	6.94775	0.930307	1.79341	-0.838896	0.530549	1.36944							AT5G50175.1
Glyma.16G130300.1	257.665	267.105	240.917	180.142	227.407	188.48	249.127	234.437	243.903	-0.287501	-0.361374	-0.0738725	PF00137	PTHR10263	KOG0232	3.6.3.14	K02155	GO:0015078,GO:0015991,GO:0033177	AT4G34720.1	ATVHA-C1,AVA-P1,VHA-C1	ATPase, F0/V0 complex, subunit C protein
Glyma.19G144200.1	75.0677	70.845	62.0008	183.606	145.963	154.405	77.4178	53.9578	86.9803	1.14825	1.21895	0.0706977	PF00010	PTHR10985:SF42,PTHR10985				GO:0046983	AT2G42280.1		basic helix-loop-helix (bHLH) DNA-binding superfamily protein
Glyma.04G043800.1	66.9523	75.6318	68.2009	101.618	67.6932	68.151	99.2536	119.079	96.844	-0.408462	0.171928	0.58039	PF00319	PTHR11945:SF19,PTHR11945				GO:0003677,GO:0046983	AT1G77980.1	AGL66	AGAMOUS-like 66
Glyma.17G004300.1	384.468	313.058	323.29	354.51	362.793	323.717	441.678	522.833	498.567	-0.491009	0.0282737	0.519283	PF00203	PTHR11880	KOG0898		K02958	GO:0003735,GO:0006412,GO:0005840	AT5G09500.1		Ribosomal protein S19 family protein
Glyma.16G026600.1	54.7792	31.593	37.2005	8.08328	15.8656	12.7783	5.95522	30.7001	16.1407	-0.523581	-1.75044	-1.22686	PF03005	PTHR13533,PTHR13533:SF3					AT1G01430.1	TBL25	TRICHOME BIREFRINGENCE-LIKE 25
Glyma.06G020400.1	65.9379	60.314	49.6007	24.2499	26.4426	33.0106	33.7462	47.4457	18.8308	-0.256974	-1.07101	-0.814039	PF00127				K02638	GO:0005507,GO:0009055	AT1G76100.1	PETE1	plastocyanin 1
Glyma.09G049800.1	93.3274	73.7171	92.1155	68.1305	64.52	67.0861	153.843	122.801	126.435	-1.01296	-0.375744	0.637219	PF09273,PF00856	PTHR13271				GO:0005515	AT4G20130.1	PTAC14	plastid transcriptionally active 14
Glyma.17G240800.1	250.564	438.473	424.263	643.198	428.371	506.873	333.492	257.695	390.066	0.685804	0.503659	-0.182145							AT5G42940.1		RING/U-box superfamily protein
Glyma.20G014300.1	4.05771	14.3605	12.4002	39.2617	37.0197	55.3727	12.903	21.3971	23.3143	1.19225	2.09489	0.902638	PF03547				K13947	GO:0055085,GO:0016021	AT1G70940.1	ATPIN3,PIN3	Auxin efflux carrier family protein
Glyma.16G020800.1	190.713	143.605	167.402	393.771	222.118	287.512	137.962	87.4489	99.5341	1.47517	0.848486	-0.626683	PF02519						AT2G46690.1		SAUR-like auxin-responsive protein family
Glyma.02G117900.1	24.3463	13.4031	20.3717	13.8571	7.40394	9.58373	7.94029	8.37277	10.7604	0.188143	-0.914038	-1.10218						GO:0008964,GO:0006099,GO:0015977	AT1G68750.1	ATPPC4,PPC4	phosphoenolpyruvate carboxylase 4
Glyma.02G146000.1	127.818	145.519	139.945	131.642	138.559	129.913	199.5	130.243	209.829	-0.431402	-0.046715	0.384687	PF01344	PTHR24414:SF184,PTHR24414				GO:0005515	AT3G63220.1		Galactose oxidase/kelch repeat superfamily protein
Glyma.01G011400.1	33.4761	14.3605	19.486	23.0951	19.0387	30.8809	18.8582	18.6061	26.9011	0.181901	0.117096	-0.0648045	PF05871	PTHR13149	KOG4068		K12189		AT4G19003.1	VPS25	E2F/DP family winged-helix DNA-binding domain
Glyma.13G366500.1	289.112	343.694	366.691	364.903	367.024	400.387	388.082	423.29	411.587	-0.111102	0.18	0.291102	PF02881,PF00448,PF02978	PTHR11564,PTHR11564:SF5	KOG0780		K03106	GO:0005525,GO:0006614,GO:0008312,GO:0048500	AT1G48900.1		Signal recognition particle, SRP54 subunit protein
Glyma.06G129000.1	450.406	700.791	734.267	741.353	647.316	635.721	678.895	660.518	604.378	0.0586136	0.102567	0.0439534	PF03145	PTHR10315	KOG3002	6.3.2.19	K04506	GO:0006511,GO:0007275,GO:0005634	AT3G61790.1		Protein with RING/U-box and TRAF-like domains
Glyma.03G193800.1	204.915	245.085	209.917	180.142	127.982	163.988	231.261	187.922	178.444	-0.340115	-0.483154	-0.143039	PF01156	PTHR12304	KOG2938				AT2G36310.1	URH1	uridine-ribohydrolase 1
Glyma.08G082200.1	39.5627	45.9535	33.6576	39.2617	51.8276	31.9458	40.694	43.7244	44.8352	-0.0711356	0.0460016	0.117137	PF07885	PTHR11003:SF5,PTHR11003	KOG1418		K05389		AT4G18160.1	ATKCO6,ATTPK3,KCO6,TPK3	Ca2+ activated outward rectifying K+ channel 6
Glyma.09G280300.1	10.1443	0.957365	0.885726	5.77377	2.11541	2.12972	1.98507	6.51215	6.27693	-0.56035	-0.258792	0.301559	PF04535						AT2G38480.1		Uncharacterised protein family (UPF0497)
Glyma.10G174000.1	108.544	65.1008	77.9439	176.677	155.483	155.469	231.261	212.11	236.73	-0.479963	0.954719	1.43468	PF08315		KOG3407				AT3G05070.1
Glyma.20G055800.1	88.2553	88.0776	76.1724	229.796	236.926	210.842	153.843	190.713	157.82	0.431591	1.42404	0.992454	PF00254	PTHR10516	KOG0552			GO:0006457	AT3G12340.1		FKBP-like peptidyl-prolyl cis-trans isomerase family protein
Glyma.16G165400.1	6.08657	8.61628	14.1716	6.92853	12.6925	4.25944	9.92536	22.3274	16.1407	-1.01898	-0.273966	0.745016	PF01535	PTHR24015					AT1G12300.1		Tetratricopeptide repeat (TPR)-like superfamily protein
Glyma.11G212500.1	8.11543	7.65892	11.5144	11.5475	2.11541	6.38915	0.992536	4.65154	3.58681	1.11921	-0.444554	-1.56377							AT1G65900.1
Glyma.14G150600.1	11.1587	17.2326	15.9431	12.7023	14.8079	10.6486	28.7835	33.4911	33.178	-1.32277	-0.21641	1.10636	PF08417,PF00355	PTHR21266:SF19,PTHR21266		1.13.12.14	K13600	GO:0016491,GO:0051537,GO:0055114,GO:0010277	AT1G44446.1	ATCAO,CAO,CH1	Pheophorbide a oxygenase family protein with Rieske [2Fe-2S] domain
Glyma.18G226400.1	3.04329	2.87209	0.885726	1.15475	1.05771	4.25944	0.992536	0.930307	0.896704	1.19873	-0.0715809	-1.27031	PF05056						AT5G01150.1		Protein of unknown function (DUF674)
Glyma.17G238800.1	141.006	84.2481	65.5437	55.4282	55.0007	50.0484	50.6193	76.2852	45.7319	-0.105368	-0.857645	-0.752278	PF04193	PTHR12226:SF2,PTHR12226	KOG3211		K09660		AT4G07390.1		Mannose-P-dolichol utilization defect 1 protein
Glyma.18G004400.1	55.7936	65.1008	73.5153	70.44	85.6742	56.4375	52.6044	57.6791	56.4923	0.349904	0.128714	-0.22119	PF07298						AT1G10830.1	Z-ISO,Z-ISO1.1,Z-ISO1.2	15-cis-zeta-carotene isomerase
Glyma.12G190200.1	77.0966	77.5465	76.1724	66.9758	69.8086	51.1132	41.6865	60.47	69.9429	0.126705	-0.296794	-0.423499	PF07714	PTHR24420:SF872,PTHR24420	KOG1187			GO:0004672,GO:0005524,GO:0006468	AT5G22050.1		Protein kinase superfamily protein
Glyma.03G179000.1	191.727	146.477	186.002	174.368	166.06	124.589	295.776	245.601	164.097	-0.601311	-0.172854	0.428457	PF04689					GO:0003677,GO:0006355,GO:0005634	AT2G37120.1		S1FA-like DNA-binding protein
Glyma.07G150700.1	227.232	227.853	260.403	419.176	501.352	395.063	249.127	227.925	298.602	0.762226	0.878711	0.116485	PF01556,PF00226	PTHR24077:SF88,PTHR24077	KOG0714				AT5G01390.1		DNAJ heat shock family protein
Glyma.06G263000.1	154.193	151.264	152.345	118.94	93.0781	102.226	129.03	128.382	146.163	-0.360949	-0.542836	-0.181887	PF03291	PTHR12189	KOG1975	2.1.1.56	K00565	GO:0008168,GO:0008152	AT3G20650.1		mRNA capping enzyme family protein
Glyma.16G164500.1	230.275	219.237	263.061	311.784	301.446	298.161	266.992	210.249	246.594	0.332408	0.355032	0.0226244	PF01529	PTHR22883	KOG1311			GO:0008270	AT4G24630.1		DHHC-type zinc finger family protein
Glyma.17G078500.1	25.3607	38.2946	55.8007	25.4046	41.2505	30.8809	47.6417	18.6061	19.7275	0.182012	-0.292473	-0.474485	PF01080	PTHR10202:SF13,PTHR10202	KOG2736	3.4.23.-	K04505	GO:0004190,GO:0016021	AT2G29900.1	PS2	Presenilin-2
Glyma.12G238600.1	1.01443	2.87209	2.65718	2.30951	3.17312	1.06486	3.97014	3.72123	1.79341	-0.534673	0.000834126	0.535508	PF00560,PF08263	PTHR24420,PTHR24420:SF701	KOG4579			GO:0005515	AT3G12610.1	DRT100	Leucine-rich repeat (LRR) family protein
Glyma.07G272400.1	366.209	590.694	496.007	285.224	276.061	376.96	378.156	360.029	341.644	-0.202765	-0.630907	-0.428142	PF08623,PF02985	PTHR12696	KOG1824				AT2G02560.2	ATCAND1,CAND1,ETA2,HVE,TIP120	cullin-associated and neddylation dissociated
Glyma.17G150600.1	2.02886	4.78682	2.65718	8.08328	12.6925	14.908	8.93282	3.72123	5.38022	0.984527	1.9134	0.92887	PF00069,PF00139	PTHR24420:SF739,PTHR24420	KOG1187			GO:0004672,GO:0005524,GO:0006468,GO:0030246	AT5G55830.1		Concanavalin A-like lectin protein kinase family protein
Glyma.06G119800.1	6.08657	0.957365	5.31436	12.7023	13.7502	4.25944	20.8433	15.8152	17.9341	-0.829906	1.31332	2.14322							AT1G76980.1
Glyma.13G023900.1	31.4473	77.5465	54.0293	64.6663	60.2892	72.4104	51.6119	48.376	48.422	0.411286	0.275796	-0.13549	PF00587	PTHR11451,PTHR11451:SF5				GO:0000166,GO:0004812,GO:0005524,GO:0006418	AT2G04842.1	EMB2761	threonyl-tRNA synthetase, putative / threonine--tRNA ligase, putative
Glyma.02G145400.1	223.174	157.008	151.459	227.487	177.695	154.405	179.649	117.219	105.811	0.47473	0.0739062	-0.400824
Glyma.09G017200.1	31.4473	19.1473	21.2574	12.7023	13.7502	10.6486	10.9179	39.0729	21.5209	-0.946718	-0.953568	-0.00684939	PF00097	PTHR11210:SF16,PTHR11210				GO:0046872,GO:0008270,GO:0005515	AT1G08050.1		Zinc finger (C3HC4-type RING finger) family protein
Glyma.12G018200.1	118.688	101.481	114.259	88.9161	90.9627	81.9942	114.142	119.079	121.055	-0.436007	-0.352826	0.0831802	PF00083	PTHR24063,PTHR24063:SF83	KOG0254			GO:0022857,GO:0055085,GO:0016021	AT5G17010.1		Major facilitator superfamily protein
Glyma.17G128400.1	191.727	236.469	201.06	435.343	489.718	430.203	681.872	572.139	662.664	-0.500033	1.10685	1.60689	PF08060,PF01798,PF08156	PTHR10894	KOG2573		K14564		AT1G56110.1	NOP56	homolog of nucleolar protein NOP56
Glyma.12G116700.1	1.01443	5.74419	0.885726	1.15475	3.17312	1.06486	1.98507	0.930307	1.79341	0.195661	-0.503377	-0.699037	PF12214,PF06886	PTHR14326:SF11,PTHR14326					AT1G03780.2	TPX2	targeting protein for XKLP2
Glyma.12G165400.1	337.805	303.485	302.918	158.201	195.676	196.999	279.895	391.659	264.528	-0.764908	-0.777377	-0.0124692	PF00071	PTHR24073:SF213,PTHR24073	KOG0087		K07976	GO:0005525,GO:0007264,GO:0005622	AT1G09630.1	ATRAB-A2A,ATRAB11C,ATRABA2A,RAB-A2A,RAB11c	RAB GTPase 11C
Glyma.13G043500.1	342.877	304.442	379.976	163.975	141.733	118.199	197.515	131.173	240.317	-0.424692	-1.27703	-0.852339	PF01061,PF00005,PF00076	PTHR19241,PTHR19241:SF20				GO:0005524,GO:0016887,GO:0003676,GO:0016020	AT1G17840.1	ABCG11,ATWBC11,COF1,DSO,WBC11	white-brown complex homolog protein 11
Glyma.08G187200.1	5.07214	7.65892	1.77145	11.5475	24.3272	15.9729	4.96268	3.72123	5.38022	1.88226	1.83798	-0.0442825	PF01556	PTHR24077,PTHR24077:SF88	KOG0714				AT1G11040.1		HSP40/DnaJ peptide-binding protein
Glyma.06G124800.1	55.7936	44.9961	56.6865	21.9403	41.2505	31.9458	65.5074	47.4457	26.9011	-0.55585	-0.727061	-0.171211	PF06017					GO:0003774,GO:0016459	AT5G53310.1		myosin heavy chain-related
Glyma.08G157500.1	120.717	99.5659	106.287	150.118	148.079	118.199	74.4402	89.3095	85.1869	0.742179	0.350565	-0.391615	PF01926	PTHR11089:SF4,PTHR11089	KOG2485			GO:0005525	AT4G10650.1		P-loop containing nucleoside triphosphate hydrolases superfamily protein
Glyma.04G089200.1	55.7936	67.9729	61.1151	43.8807	84.6164	62.8267	20.8433	35.3517	43.9385	0.934093	0.049415	-0.884678	PF07690	PTHR19432,PTHR19432:SF2	KOG0637				AT1G09960.1	ATSUC4,ATSUT4,SUC4,SUT4	sucrose transporter 4
Glyma.13G121800.1	8.11543	17.2326	17.7145	11.5475	14.8079	15.9729	13.8955	22.3274	31.3846	-0.67556	-0.0248096	0.650751	PF01535	PTHR24015,PTHR24015:SF141					AT1G68930.1		pentatricopeptide (PPR) repeat-containing protein
Glyma.19G240400.1	3349.64	3134.41	3533.16	3294.52	3227.06	2962.44	3114.58	3381.67	3446.03	-0.0680786	-0.0789122	-0.0108335	PF00080	PTHR10003	KOG0441	1.15.1.1	K04565	GO:0046872,GO:0006801,GO:0055114	AT1G08830.1	CSD1	copper/zinc superoxide dismutase 1
Glyma.03G255200.1	6.08657	8.61628	9.74299	3.46426	3.17312	11.7135	2.97761	3.72123	0.896704	1.27262	-0.413744	-1.68636	PF01138	PTHR11953					AT3G61620.1	RRP41	3\'-5\'-exoribonuclease family protein
Glyma.11G013200.1	783.139	726.64	637.723	467.676	461.16	372.701	1010.4	827.974	858.145	-1.05088	-0.722444	0.32844							AT3G03150.1
Glyma.16G174500.1	3.04329	1.91473	0.885726	1.15475	1.05771	1.06486	1.98507	0.930307	1.79341	-0.522839	-0.834376	-0.311537	PF00560	PTHR24420,PTHR24420:SF473	KOG0472			GO:0005515	AT1G17240.1	AtRLP2,RLP2	receptor like protein 2
Glyma.06G310100.1	13.1876	14.3605	25.6861	24.2499	48.6545	13.8432	25.8059	34.4214	35.8681	-0.147646	0.704471	0.852117	PF07859	PTHR23024:SF10,PTHR23024	KOG1515			GO:0016787,GO:0008152	AT1G68620.1		alpha/beta-Hydrolases superfamily protein
Glyma.16G036200.1	463.594	372.415	391.491	639.734	682.22	634.656	553.835	529.345	457.319	0.344959	0.672634	0.327675	PF00327,PF08079	PTHR11524	KOG3184		K02937		AT1G80750.1		Ribosomal protein L30/L7 family protein
Glyma.12G080000.1	28.404	34.4651	31.8861	39.2617	44.4236	36.2052	77.4178	60.47	51.1121	-0.656668	0.339439	0.996107	PF03357	PTHR10476,PTHR10476:SF1	KOG3229			GO:0015031	AT5G22950.1	VPS24.1	SNF7 family protein
Glyma.09G011400.1	1.01443	0.957365	1.77145	1.15475	2.11541	2.12972	0.992536	1.86061	0.896704	0.526094	0.528639	0.00254484	PF00083	PTHR24063,PTHR24063:SF85	KOG0569		K08150	GO:0022857,GO:0055085,GO:0016021	AT4G16480.1	ATINT4,INT4	inositol transporter 4
Glyma.18G081100.1	141.006	204.876	180.688	198.618	132.213	157.599	184.612	283.744	142.576	-0.322858	-0.108472	0.214385	PF03514						AT1G50600.1	SCL5	scarecrow-like 5
Glyma.02G040000.1	5.07214	9.57365	8.85726	2.30951	5.28853	2.12972	5.95522	9.30307	5.38022	-1.08516	-1.27267	-0.187509	PF03959	PTHR22778					AT4G24380.1
Glyma.18G294300.1	3.04329	4.78682	1.77145	6.92853	3.17312	4.25944	0.992536	0.930307	0.896704	2.34863	0.580823	-1.76781	PF07722	PTHR11922,PTHR11922:SF16				GO:0016787,GO:0006541	AT5G38200.1		Class I glutamine amidotransferase-like superfamily protein
Glyma.01G046500.1	127.818	108.182	112.487	127.023	105.771	109.68	87.3432	84.658	95.0506	0.358876	-0.0251119	-0.383987	PF04116	PTHR11863,PTHR11863:SF3	KOG0874			GO:0005506,GO:0016491,GO:0006633,GO:0055114	AT1G14290.1	SBH2	sphingoid base hydroxylase 2
Glyma.19G077200.1	42.606	79.4613	84.144	62.3568	64.52	59.6321	61.5372	62.3306	67.2528	-0.0352387	-0.144879	-0.10964		PTHR23125,PTHR23125:SF168					AT3G26000.1		Ribonuclease inhibitor
Glyma.02G160600.1	4.05771	0.957365	0.885726	2.30951	5.28853	2.12972	0.992536	0.930307	3.58681	0.820144	0.721195	-0.0989492
Glyma.09G159600.1	11.1587	8.61628	8.85726	3.46426	4.23082	3.19458	5.95522	2.79092	2.69011	-0.0706544	-1.39468	-1.32403	PF01699					GO:0055085,GO:0016021	AT1G55730.1	ATCAX5,CAX5	cation exchanger 5
Glyma.08G102200.1	9.12986	10.531	22.1432	2.30951	8.46164	5.3243	4.96268	13.0243	5.38022	-0.537832	-1.37699	-0.839157							AT1G27850.1
Glyma.05G174100.1	310.415	232.64	252.432	468.83	493.949	421.684	194.537	155.361	210.725	1.30422	0.799417	-0.504805							AT1G71190.1	SAG18	senescence associated gene 18
Glyma.04G002700.1	257.665	134.988	175.374	159.356	139.617	137.367	180.642	143.267	125.539	-0.0426991	-0.380507	-0.337807							AT3G07580.1
Glyma.07G004900.1	388.526	229.768	285.204	389.152	375.485	297.096	532.992	449.338	402.62	-0.383412	0.232829	0.616242	PF01907	PTHR10768	KOG3475		K02922	GO:0003735,GO:0006412,GO:0005622,GO:0005840	AT3G16080.1		Zinc-binding ribosomal protein family protein
Glyma.15G027900.1	216.073	266.147	260.403	204.392	252.792	211.907	264.015	203.737	325.503	-0.245585	-0.150432	0.095153	PF00564,PF02042					GO:0005515	AT2G43500.1		Plant regulator RWP-RK family protein
Glyma.16G004800.1	411.858	904.71	545.607	757.519	689.624	931.752	729.514	631.679	742.471	0.177388	0.353303	0.175915	PF07728	PTHR22908:SF25,PTHR22908	KOG1808		K14572	GO:0005524,GO:0016887	AT1G67120.1		ATPases;nucleotide binding;ATP binding;nucleoside-triphosphatases;transcription factor binding
Glyma.08G158500.1	92.313	78.5039	48.7149	9.23804	26.4426	13.8432	64.5148	106.985	73.5297	-2.30676	-2.14824	0.158527							AT2G31940.1
Glyma.06G287500.1	1.01443	2.87209	2.65718	3.46426	3.17312	2.12972	3.97014	2.79092	3.58681	-0.239164	0.421993	0.661157	PF08513	PTHR12864					AT1G61150.1		LisH and RanBPM domains containing protein
Glyma.07G167300.1	201.871	100.523	119.573	112.011	86.7319	70.2807	99.2536	104.194	99.5341	-0.171499	-0.649399	-0.4779		PTHR11695:SF5,PTHR11695					AT1G26320.1		Zinc-binding dehydrogenase family protein
Glyma.15G049100.1	1.01443	4.78682	1.77145	1.15475	1.05771	1.06486	9.92536	2.79092	2.69011	-2.23294	-1.20829	1.02465	PF02458					GO:0016747	AT3G26040.1		HXXXD-type acyl-transferase family protein
Glyma.19G120900.1	106.515	89.9923	69.0866	95.8447	88.8473	94.7725	122.082	79.0761	155.13	-0.350379	0.0734422	0.423821	PF01554	PTHR11206:SF9,PTHR11206	KOG1347			GO:0015238,GO:0015297,GO:0006855,GO:0055085,GO:0016020	AT1G33110.1		MATE efflux family protein
Glyma.05G175000.1	48.6926	73.7171	54.0293	76.2138	55.0007	79.8644	61.5372	41.8638	27.7978	0.686027	0.258614	-0.427414	PF04724	PTHR12224		2.4.1.144	K00737	GO:0003830,GO:0006487,GO:0016020	AT1G12990.1		beta-1,4-N-acetylglucosaminyltransferase family protein
Glyma.02G266000.1	9.12986	9.57365	6.20008	12.7023	5.28853	10.6486	1.98507	6.51215	2.69011	1.35614	0.201649	-1.15449	PF00612					GO:0005515	AT5G35670.1	iqd33	IQ-domain 33
Glyma.01G016500.1	8.11543	6.70155	7.97153	6.92853	6.34623	9.58373	17.8656	32.5608	16.1407	-1.54208	0.00442332	1.5465	PF00664,PF00005	PTHR24221	KOG0055			GO:0005524,GO:0016887,GO:0042626,GO:0006810,GO:0055085,GO:0016021	AT4G25960.1	PGP2	P-glycoprotein 2
Glyma.20G052000.1	272.881	239.341	241.803	252.891	259.138	264.085	149.873	146.989	163.2	0.754442	0.0416553	-0.712787	PF00534,PF08288	PTHR12526,PTHR12526:SF58	KOG1111	2.4.1.198	K03857	GO:0009058,GO:0006506	AT3G45100.1	SETH2	UDP-Glycosyltransferase superfamily protein
Glyma.07G212300.1	162.309	155.093	134.63	270.213	288.754	317.328	205.455	186.992	202.655	0.558279	0.95499	0.396711	PF08553		KOG2395				AT3G19240.1		Vacuolar import/degradation, Vid27-related protein
Glyma.13G368900.1	72.0244	110.097	108.944	139.725	90.9627	100.097	92.3058	72.564	104.914	0.294087	0.184548	-0.109539		PTHR23125:SF22,PTHR23125					AT1G80570.2		RNI-like superfamily protein
Glyma.01G209900.1	11.1587	5.74419	9.74299	5.77377	2.11541	9.58373	3.97014	9.30307	1.79341	0.213764	-0.608793	-0.822557	PF03765,PF00650	PTHR23324,PTHR23324:SF5	KOG1471				AT5G47510.1		Sec14p-like phosphatidylinositol transfer family protein
Glyma.14G019300.1	38.5483	51.6977	69.0866	64.6663	70.8663	88.3833	15.8806	26.0486	23.3143	1.77905	0.490915	-1.28814
Glyma.05G209500.1	66.9523	53.6124	62.8865	58.8925	77.2125	59.6321	80.3954	77.2155	93.2572	-0.358012	0.0935204	0.451532	PF01388,PF01448					GO:0003677,GO:0005622	AT4G11400.1		ARID/BRIGHT DNA-binding domain;ELM2 domain protein
Glyma.12G167500.1	303.314	399.221	360.491	541.58	639.912	502.614	422.82	346.074	436.695	0.482244	0.663806	0.181562	PF07946	PTHR12883	KOG2357				AT4G24330.1		Protein of unknown function (DUF1682)
Glyma.13G352200.1	255.636	218.279	170.945	232.106	273.946	224.685	274.932	318.165	241.213	-0.191233	0.180365	0.371598	PF03357	PTHR10476,PTHR10476:SF2	KOG3232		K12197	GO:0015031	AT1G17730.1	CHMP1B,VPS46.1	vacuolar protein sorting 46.1
Glyma.17G057600.1	11.1587	10.531	4.42863	5.77377	4.23082	3.19458	9.92536	9.30307	4.48352	-0.845167	-0.984617	-0.13945	PF00560	PTHR23155:SF280,PTHR23155	KOG0617			GO:0005515	AT2G19330.1	PIRL6	plant intracellular ras group-related LRR 6
Glyma.07G246500.1	58.8369	92.8644	147.916	136.261	158.656	111.81	58.5596	88.3792	87.877	0.792532	0.440939	-0.351593							AT5G49100.1
Glyma.13G241500.1	499.099	492.085	551.807	533.497	487.602	487.705	468.477	519.111	496.774	0.0235626	-0.0323245	-0.0558871	PF00037	PTHR10849	KOG3256	1.6.5.3,1.6.99.3	K03941	GO:0009055,GO:0051536	AT1G16700.1		Alpha-helical ferredoxin
Glyma.04G097100.1	117.674	239.341	220.546	195.154	137.502	154.405	147.888	125.591	148.853	0.205721	-0.245873	-0.451594	PF00069	PTHR24349	KOG0032			GO:0004672,GO:0005524,GO:0006468,GO:0016773,GO:0009103,GO:0016020	AT1G12680.1	PEPKR2	phosphoenolpyruvate carboxylase-related kinase 2
Glyma.07G195300.1	5.07214	4.78682	5.31436	4.61902	7.40394	1.06486	0.992536	0.930307	0.896704	2.21469	-0.213313	-2.428	PF12481,PF12504	PTHR11772				GO:0008152	AT4G27450.1		Aluminium induced protein with YGL and LRDR motifs
Glyma.19G221300.1	551.849	659.624	566.865	568.139	547.892	650.629	416.865	503.296	424.141	0.394167	-0.00950548	-0.403672	PF04811,PF04815,PF04810,PF08033	PTHR11141	KOG1986			GO:0008270,GO:0006886,GO:0006888,GO:0030127	AT4G01810.1		Sec23/Sec24 protein transport family protein
Glyma.06G269600.1	8854.95	9206.98	10789	18031.5	14382.7	12375.8	11647.4	10796.2	10484.3	0.443866	0.634557	0.190691	PF01253	PTHR10388	KOG1770			GO:0003743,GO:0006413	AT4G27130.1		Translation initiation factor SUI1 family protein
Glyma.06G265700.1	1329.92	917.155	864.469	2905.36	1836.18	2280.93	296.768	152.57	324.607	3.18167	1.17435	-2.00733	PF01370	PTHR10366,PTHR10366:SF9	KOG1502			GO:0016491,GO:0008152,GO:0003854,GO:0016616,GO:0006694,GO:0055114,GO:0003824,GO:0050662,GO:0044237,GO:0009058	AT4G27250.1		NAD(P)-binding Rossmann-fold superfamily protein
Glyma.18G109600.1	46.6637	36.3799	43.4006	3.46426	2.11541	1.06486	6.94775	5.58184	2.69011	-1.1957	-4.25019	-3.05449	PF03188	PTHR23130,PTHR23130:SF18				GO:0016021	AT4G18260.1		Cytochrome b561/ferric reductase transmembrane protein family
Glyma.11G004100.1	447.363	444.217	390.605	441.116	514.045	589.932	594.529	638.191	627.693	-0.267929	0.269089	0.537017	PF00176,PF00271	PTHR10799,PTHR10799:SF209	KOG0386	3.6.4.-	K11647	GO:0003677,GO:0005524,GO:0003676,GO:0004386,GO:0016787	AT3G06010.1	ATCHR12	Homeotic gene regulator
Glyma.16G082100.1	22.3174	15.3178	14.1716	66.9758	63.4623	50.0484	29.7761	25.1183	22.4176	1.22313	1.80068	0.577548
Glyma.07G065500.1	17.2453	41.1667	19.486	5.77377	6.34623	11.7135	15.8806	21.3971	15.244	-1.13992	-1.7086	-0.568674	PF00931	PTHR23155,PTHR23155:SF121	KOG4658			GO:0043531	AT4G27220.1		NB-ARC domain-containing disease resistance protein
Glyma.14G065400.1	133.905	133.074	113.373	88.9161	93.0781	113.94	133	106.055	114.778	-0.257792	-0.362056	-0.104264	PF08245	PTHR11136	KOG2525	6.3.2.17	K01930	GO:0005524,GO:0009058	AT5G05980.2	ATDFB,DFB	DHFS-FPGS homolog B
Glyma.15G068700.1	54.7792	73.7171	58.4579	4.61902	13.7502	24.4918	43.6716	59.5397	25.1077	-1.582	-2.12495	-0.54295	PF01490	PTHR22950	KOG1303				AT1G47670.1		Transmembrane amino acid transporter family protein
Glyma.06G202100.1	417.945	269.019	261.289	1101.64	948.762	992.449	751.35	719.128	657.284	0.516085	1.68208	1.16599	PF04004	PTHR23146	KOG2428				AT5G61150.1	VIP4	leo1-like family protein
Glyma.13G243800.1	4.05771	0.957365	2.65718	4.61902	2.11541	1.06486	0.992536	4.65154	1.79341	0.0685288	0.0236915	-0.0448373							AT1G11112.1
Glyma.17G051400.1	9.12986	6.70155	7.97153	16.1666	5.28853	7.45401	11.9104	24.188	8.07033	-0.611502	0.280384	0.891886	PF02045	PTHR12632:SF5,PTHR12632				GO:0003700,GO:0006355	AT1G17590.1	NF-YA8	nuclear factor Y, subunit A8
Glyma.16G013500.1	198.828	368.585	305.575	189.38	151.252	204.453	265.007	266.998	261.837	-0.542373	-0.679483	-0.13711	PF01504,PF01363,PF00118	PTHR11353,PTHR11353:SF14	KOG0230	2.7.1.150	K00921	GO:0005524,GO:0044267,GO:0046872,GO:0016307,GO:0046488	AT3G14270.1	FAB1B	phosphatidylinositol-4-phosphate 5-kinase family protein
Glyma.19G193500.1	24.3463	17.2326	21.2574	19.6308	13.7502	17.0377	20.8433	39.0729	26.9011	-0.784022	-0.317637	0.466384	PF00657	PTHR22835,PTHR22835:SF39				GO:0016788,GO:0006629	AT5G03610.1		GDSL-like Lipase/Acylhydrolase superfamily protein
Glyma.02G155400.1	299.256	286.252	314.433	511.556	600.777	504.743	385.104	347.935	365.855	0.557336	0.845485	0.288149	PF09420		KOG4771				AT1G02870.1
Glyma.13G211400.1	93.3274	189.558	139.059	206.701	170.291	211.907	147.888	142.337	132.712	0.477577	0.480966	0.00338909	PF03909	PTHR16019	KOG2690				AT4G13110.1		BSD domain-containing protein
Glyma.10G203600.1	2.02886	0.957365	3.5429	1.15475	2.11541	2.12972	1.98507	0.930307	0.896704	0.502349	-0.273961	-0.77631	PF07690	PTHR24003,PTHR24003:SF15				GO:0055085,GO:0016021	AT2G16980.2		Major facilitator superfamily protein
Glyma.03G263100.1	5.07214	4.78682	14.1716	10.3928	14.8079	7.45401	5.95522	12.094	4.48352	0.535268	0.442418	-0.0928496
Glyma.06G088200.1	185.64	143.605	129.316	158.201	141.733	160.794	130.022	106.985	122.848	0.356495	0.0068001	-0.349695	PF01490	PTHR22950	KOG1303			GO:0003333	AT1G58360.1	AAP1,NAT2	amino acid permease 1
Glyma.04G062300.1	301.285	373.372	414.52	605.092	592.315	505.808	391.059	327.468	390.963	0.618363	0.645021	0.0266579	PF04857	PTHR10797	KOG0304		K12581	GO:0005634	AT2G32070.1		Polynucleotidyl transferase, ribonuclease H-like superfamily protein
Glyma.11G146100.1	1.01443	1.91473	0.885726	1.15475	3.17312	3.19458	1.98507	4.65154	2.69011	-0.310167	0.979563	1.28973	PF00361					GO:0008137,GO:0055114	ATCG00890.1		NADH-Ubiquinone/plastoquinone (complex I) protein
Glyma.13G294000.1	4.05771	1.91473	3.5429	3.46426	3.17312	6.38915	3.97014	2.79092	1.79341	0.606703	0.453125	-0.153578	PF02365					GO:0003677,GO:0006355	AT4G28500.1	ANAC073,NAC073,SND2	NAC domain containing protein 73
Glyma.02G184200.1	1.01443	4.78682	0.885726	1.15475	1.05771	5.3243	0.992536	0.930307	2.69011	0.708253	0.172589	-0.535663	PF00201	PTHR11926:SF15,PTHR11926	KOG1192			GO:0016758,GO:0008152	AT2G36770.1		UDP-Glycosyltransferase superfamily protein
Glyma.05G159400.1	401.714	249.872	280.775	397.236	336.35	325.847	158.806	148.849	156.923	1.1893	0.184331	-1.00497	PF00069	PTHR24057	KOG0658			GO:0004672,GO:0005524,GO:0006468	AT4G18710.1	ATSK21,BIN2,DWF12,SK21,UCU1	Protein kinase superfamily protein
Glyma.03G209900.1	122.746	89.9923	109.83	93.5351	107.886	89.4482	116.127	98.6126	83.3934	-0.0355838	-0.149233	-0.113649	PF00097,PF05495	PTHR21319	KOG1940		K10144	GO:0046872,GO:0008270,GO:0005515	AT3G62970.1		zinc finger (C3HC4-type RING finger) family protein
Glyma.18G031300.1	265.78	244.128	274.575	385.688	279.234	308.809	174.686	89.3095	147.956	1.24105	0.311781	-0.929267	PF01490	PTHR22950	KOG1303				AT2G39890.1	ATPROT1,PROT1	proline transporter 1
Glyma.20G122500.1	377.367	449.004	438.434	273.677	265.484	326.912	1596.99	1375.92	1573.72	-2.39224	-0.546356	1.84588	PF00274	PTHR11627	KOG1557	4.1.2.13	K01623	GO:0004332,GO:0006096	AT2G01140.1		Aldolase superfamily protein
Glyma.12G088200.1	2912.42	5347.84	4339.17	4958.52	4651.79	5380.73	4212.32	3523.07	4861.93	0.250983	0.250741	-0.000241901	PF00777	PTHR13713:SF31,PTHR13713	KOG2692			GO:0008373,GO:0006486	AT1G08280.1		Glycosyltransferase family 29 (sialyltransferase) family protein
Glyma.17G120200.1	30.4329	25.8488	34.5433	9.23804	23.2695	11.7135	45.6567	25.1183	35.8681	-1.26999	-1.03836	0.231629	PF01940	PTHR13353	KOG4491			GO:0016021	AT5G19930.1		Protein of unknown function DUF92, transmembrane
Glyma.02G235100.1	7.101	33.5078	24.8003	218.249	159.714	176.767	115.134	53.9578	81.6	1.14587	3.08422	1.93835	PF00069,PF03822	PTHR24343,PTHR24343:SF45	KOG0583			GO:0004672,GO:0005524,GO:0006468,GO:0007165	AT2G30360.1	CIPK11,PKS5,SIP4,SNRK3.22	SOS3-interacting protein 4
Glyma.11G147000.1	23.3319	24.8915	15.0573	30.0236	25.3849	12.7783	44.6641	41.8638	33.178	-0.811929	0.107729	0.919658	PF01300	PTHR17490	KOG3051			GO:0003725	AT5G60590.2		DHBP synthase RibB-like alpha/beta domain
Glyma.11G097400.1	10.1443	31.593	31.0004	33.4879	30.6735	25.5566	30.7686	26.0486	28.6945	0.0692745	0.302693	0.233418	PF03759					GO:0005089	AT4G38430.1	ATROPGEF1,ROPGEF1	rho guanyl-nucleotide exchange factor 1
Glyma.06G050600.1	316.502	218.279	225.86	812.947	700.201	702.807	267.985	293.977	242.11	1.46253	1.54264	0.0801085	PF07797						AT1G55340.1		Protein of unknown function (DUF1639)
Glyma.18G266000.1	3.04329	8.61628	4.42863	4.61902	6.34623	2.12972	2.97761	4.65154	7.17363	-0.176855	-0.29699	-0.120135	PF00201	PTHR11926,PTHR11926:SF15	KOG1192			GO:0016758,GO:0008152	AT3G02100.1		UDP-Glycosyltransferase superfamily protein
Glyma.20G102400.1	248.535	306.357	293.175	243.653	279.234	267.28	263.022	199.086	283.358	0.0840151	-0.10202	-0.186036	PF00097	PTHR22763				GO:0046872,GO:0005515,GO:0008270	AT5G64920.1	CIP8	COP1-interacting protein 8
Glyma.02G251400.1	69.9956	53.6124	51.3721	23.0951	40.1928	26.6215	47.6417	45.5851	50.2154	-0.673926	-0.960647	-0.286722	PF08245	PTHR11136	KOG2525			GO:0005524,GO:0009058	AT5G05980.2	ATDFB,DFB	DHFS-FPGS homolog B
Glyma.03G190000.1	75.0677	147.434	108.059	77.3686	101.54	95.8373	77.4178	91.1701	78.9099	0.150681	-0.266818	-0.417498	PF11961,PF05003						AT5G04550.1		Protein of unknown function (DUF668)
Glyma.16G185000.1	9.12986	5.74419	8.85726	27.7141	12.6925	20.2323	2.97761	6.51215	5.38022	2.02784	1.35345	-0.674389	PF05686	PTHR12203:SF11,PTHR12203					AT3G48980.1		Arabidopsis thaliana protein of unknown function (DUF821)
Glyma.01G145300.1	137.962	74.6744	117.802	93.5351	76.1548	71.3456	92.3058	114.428	137.196	-0.512866	-0.455135	0.0577311	PF05175	PTHR23290	KOG3420		K07579	GO:0008168,GO:0031167,GO:0008276,GO:0006479,GO:0005737,GO:0008152,GO:0001510,GO:0009452	AT4G28830.1		S-adenosyl-L-methionine-dependent methyltransferases superfamily protein
Glyma.04G068500.1	7.101	13.4031	8.85726	11.5475	10.5771	6.38915	10.9179	11.1637	8.07033	-0.0805915	-0.0422609	0.0383305	PF02230	PTHR10655,PTHR10655:SF5	KOG2112			GO:0016787	AT5G20060.1		alpha/beta-Hydrolases superfamily protein
Glyma.04G007900.1	77.0966	66.0582	59.3436	78.5233	111.059	83.059	105.209	93.0307	98.6374	-0.12286	0.429094	0.551955							AT2G21290.1
Glyma.03G196600.1	433.161	676.857	646.58	287.534	295.1	324.782	383.119	303.28	380.202	-0.233185	-0.952948	-0.719763	PF00646					GO:0005515	AT1G57790.1		F-box family protein
Glyma.12G048100.1	4.05771	3.82946	2.65718	4.61902	2.11541	1.06486	0.992536	2.79092	1.79341	0.483888	-0.435056	-0.918944
Glyma.08G053000.1	13.1876	20.1047	9.74299	18.4761	10.5771	7.45401	9.92536	13.9546	18.8308	-0.22642	-0.237339	-0.0109187	PF06966	PTHR10556,PTHR10556:SF24	KOG4650			GO:0016627,GO:0006629,GO:0005737,GO:0016021	AT1G73650.3		Protein of unknown function (DUF1295)
Glyma.02G011900.1	7.101	2.87209	6.20008	116.63	82.501	69.2158	19.8507	15.8152	25.1077	2.14258	4.05243	1.90984							AT2G47360.1
Glyma.01G037600.1	1.01443	1.91473	3.5429	1.15475	1.05771	1.06486	6.94775	4.65154	1.79341	-2.03086	-0.981709	1.04915	PF02181	PTHR23213,PTHR23213:SF18	KOG1922				AT1G70140.1	ATFH8,FH8	formin 8
Glyma.12G200700.1	237.376	127.33	173.602	366.057	313.081	212.972	204.462	137.685	170.374	0.799609	0.728789	-0.0708195	PF12609						AT4G10265.1		Wound-responsive family protein
Glyma.12G004900.1	2.02886	0.957365	1.77145	1.15475	1.05771	1.06486	1.98507	0.930307	0.896704	-0.218063	-0.53774	-0.319677	PF02365					GO:0003677,GO:0006355	AT1G12260.1	ANAC007,EMB2749,NAC007,VND4	NAC 007
Glyma.18G003300.1	8.11543	6.70155	3.5429	2.30951	5.28853	3.19458	5.95522	3.72123	1.79341	-0.0878023	-0.766513	-0.67871							AT4G14200.1		Pentatricopeptide repeat (PPR) superfamily protein
Glyma.04G131700.1	303.314	404.008	317.976	391.462	397.697	449.371	367.238	317.235	390.963	0.203707	0.272586	0.0688786	PF00350,PF01031,PF02212	PTHR11566,PTHR11566:SF12	KOG0446			GO:0003924,GO:0005525	AT4G33650.1	ADL2,DRP3A	dynamin-related protein 3A
Glyma.19G007600.1	9.12986	7.65892	7.97153	33.4879	28.5581	44.7241	6.94775	4.65154	1.79341	2.99499	2.10841	-0.886583	PF07816						AT1G23710.1		Protein of unknown function (DUF1645)
Glyma.14G014500.1	3.04329	1.91473	2.65718	3.46426	2.11541	1.06486	5.95522	0.930307	1.79341	-0.385349	-0.196713	0.188636	PF01095					GO:0030599,GO:0042545,GO:0005618	AT5G55590.1	QRT1	Pectin lyase-like superfamily protein
Glyma.15G093300.1	211.001	250.83	263.946	243.653	210.483	177.831	313.641	300.489	267.218	-0.47986	-0.199675	0.280186	PF01344,PF00646	PTHR24411,PTHR24411:SF196				GO:0005515	AT1G30090.1		Galactose oxidase/kelch repeat superfamily protein
Glyma.20G118500.1	1.01443	0.957365	1.77145	1.15475	1.05771	1.06486	0.992536	0.930307	0.896704	0.217053	-0.191773	-0.408826	PF00069	PTHR24420,PTHR24420:SF441	KOG1187			GO:0004672,GO:0005524,GO:0006468	AT4G18250.1		receptor serine/threonine kinase, putative
Glyma.08G286200.1	359.108	291.996	325.061	153.582	226.349	195.934	322.574	307.932	311.156	-0.709478	-0.761394	-0.0519163	PF00227	PTHR11599:SF8,PTHR11599	KOG0179	3.4.25.1	K02732	GO:0004298,GO:0051603,GO:0005839	AT3G60820.1	PBF1	N-terminal nucleophile aminohydrolases (Ntn hydrolases) superfamily protein
Glyma.10G080000.1	224.189	283.38	314.433	364.903	368.082	303.485	159.798	94.8913	180.237	1.25283	0.334464	-0.918367	PF03168						AT3G11660.1	NHL1	NDR1/HIN1-like 1
Glyma.12G150500.1	4928.09	4847.14	3487.99	4078.59	1498.77	1918.88	648.126	707.964	498.567	2.01501	-0.823192	-2.83821	PF12504,PF12481	PTHR11772					AT4G27450.1		Aluminium induced protein with YGL and LRDR motifs
Glyma.13G022300.1	13.1876	1.91473	0.885726	10.3928	9.51935	6.38915	12.903	13.0243	7.17363	-0.331736	0.718142	1.04988
Glyma.18G214000.1	67.9667	74.6744	62.8865	56.583	43.3659	53.243	86.3506	54.8881	60.9759	-0.400547	-0.423993	-0.0234458	PF07714	PTHR24420:SF453,PTHR24420	KOG1187			GO:0004672,GO:0005524,GO:0006468	AT3G08760.1	ATSIK	Protein kinase superfamily protein
Glyma.20G172300.1	60.8657	53.6124	28.3432	11.5475	15.8656	12.7783	42.679	34.4214	36.7649	-1.50237	-1.82925	-0.326884	PF02325					GO:0016020	AT5G36120.1	atylmg3,CCB3,YLMG3	cofactor assembly, complex C (B6F)
Glyma.13G326000.1	1.01443	4.78682	1.77145	1.15475	1.05771	1.06486	0.992536	2.79092	2.69011	-0.982045	-1.20829	-0.226247							AT2G28410.1
Glyma.08G125600.1	9.12986	10.531	5.31436	17.3213	29.6158	11.7135	4.96268	1.86061	7.17363	2.06703	1.23165	-0.835388	PF00201	PTHR11926,PTHR11926:SF15	KOG1192	2.4.1.-	K13691	GO:0016758,GO:0008152	AT2G43840.2	UGT74F1	UDP-glycosyltransferase 74 F1
Glyma.18G238000.1	37.5339	38.2946	24.8003	30.0236	24.3272	38.3349	92.3058	133.964	77.1165	-1.71074	-0.118623	1.59211	PF00403	PTHR22814,PTHR22814:SF56	KOG1603			GO:0046872,GO:0030001	AT1G01490.1		Heavy metal transport/detoxification superfamily protein
Glyma.03G038800.1	40.5771	82.3334	82.3725	9.23804	3.17312	7.45401	35.7313	18.6061	28.6945	-2.06343	-3.3693	-1.30588	PF00931	PTHR23155,PTHR23155:SF236	KOG4658			GO:0043531	AT3G14460.1		LRR and NB-ARC domains-containing disease resistance protein
Glyma.14G192300.1	41.5916	13.4031	27.4575	13.8571	14.8079	14.908	17.8656	23.2577	27.7978	-0.661513	-0.920125	-0.258611	PF02099	PTHR13291	KOG2934			GO:0008242	AT2G29640.1	JOSL	JOSEPHIN-like protein
Glyma.09G247500.1	195.785	175.198	202.831	289.843	259.138	285.382	286.843	296.768	277.978	-0.0463238	0.540094	0.586417	PF07766	PTHR14009,PTHR14009:SF1	KOG1043				AT1G65540.1		LETM1-like protein
Glyma.17G044400.1	60.8657	59.3566	65.5437	43.8807	59.2315	60.697	57.5671	52.0972	30.4879	0.225021	-0.181471	-0.406492	PF00069	PTHR12209	KOG3087	2.7.11.1	K08851	GO:0004672,GO:0005524,GO:0006468,GO:0003824,GO:0016773,GO:0009103,GO:0016020	AT5G26110.1		Protein kinase superfamily protein
Glyma.16G067000.1	7.101	4.78682	7.08581	11.5475	7.40394	10.6486	21.8358	12.094	13.4506	-0.678688	0.641605	1.32029	PF06203					GO:0005515	AT5G14370.1		CCT motif family protein
Glyma.19G027200.1	374.324	476.768	491.578	513.866	559.526	522.846	432.746	489.342	527.262	0.139271	0.249571	0.110301	PF04564,PF10408	PTHR13931,PTHR13931:SF2	KOG2042	6.3.2.19	K10597	GO:0004842,GO:0016567,GO:0000151,GO:0034450,GO:0006511	AT5G15400.1		U-box domain-containing protein
Glyma.08G246100.1	187.669	335.078	230.289	294.462	209.426	276.863	129.03	129.313	126.435	1.02084	0.0521452	-0.968693	PF00069,PF00560,PF08263	PTHR24420,PTHR24420:SF99	KOG1187			GO:0004672,GO:0005524,GO:0006468,GO:0005515	AT3G02130.1	RPK2,TOAD2	receptor-like protein kinase 2
Glyma.14G026900.1	35.505	24.8915	44.2863	33.4879	37.0197	45.7889	46.6492	55.8184	62.7693	-0.506728	0.151784	0.658511
Glyma.14G043200.1	1.01443	2.87209	1.77145	1.15475	2.11541	2.12972	2.97761	4.65154	6.27693	-1.36471	-0.0673573	1.29736
Glyma.06G114000.1	9721.27	10661.2	10506.5	33561.8	27663.2	28951.4	7791.41	6303.76	8620.91	1.98904	1.54566	-0.443378	PF02365					GO:0003677,GO:0006355	AT1G01720.1	ANAC002,ATAF1	NAC (No Apical Meristem) domain transcriptional regulator superfamily protein
Glyma.20G169400.1	1.01443	0.957365	1.77145	1.15475	1.05771	2.12972	0.992536	0.930307	0.896704	0.622956	0.214129	-0.408826	PF00069	PTHR24056,PTHR24056:SF77	KOG0600			GO:0004672,GO:0005524,GO:0006468	AT1G53050.1		Protein kinase superfamily protein
Glyma.08G080300.1	10.1443	15.3178	13.2859	19.6308	22.2118	19.1675	6.94775	8.37277	14.3473	1.04015	0.654926	-0.385226	PF01535	PTHR24015:SF124,PTHR24015					AT2G03880.1		Pentatricopeptide repeat (PPR) superfamily protein
Glyma.03G063600.1	4.05771	5.74419	6.20008	3.46426	4.23082	3.19458	2.97761	8.37277	14.3473	-1.23868	-0.555291	0.683385	PF01490	PTHR22950:SF14,PTHR22950	KOG1303		K13946		AT2G38120.1	AUX1,MAP1,PIR1,WAV5	Transmembrane amino acid transporter family protein
Glyma.09G242000.1	125.789	176.155	111.601	50.8092	47.5968	38.3349	116.127	125.591	136.299	-1.46701	-1.5966	-0.129595	PF00324	PTHR11785,PTHR11785:SF131	KOG1286			GO:0006810,GO:0055085,GO:0016020,GO:0015171,GO:0003333	AT1G05940.1	CAT9	cationic amino acid transporter 9
Glyma.15G171300.1	12.1731	14.3605	7.97153	26.5594	29.6158	9.58373	12.903	13.0243	8.96704	0.914193	0.930373	0.0161799	PF01556	PTHR24077:SF89,PTHR24077	KOG0714				AT2G20560.1		DNAJ heat shock family protein
Glyma.02G159200.1	4.05771	4.78682	0.885726	4.61902	2.11541	6.38915	2.97761	3.72123	2.69011	0.483126	0.431611	-0.0515155	PF00106	PTHR24322	KOG0725			GO:0016491,GO:0008152	AT3G55290.1		NAD(P)-binding Rossmann-fold superfamily protein
Glyma.10G064000.1	167.381	229.768	217.889	293.308	342.697	304.55	147.888	174.898	182.928	0.895191	0.612838	-0.282354	PF00585,PF00291	PTHR10314,PTHR10314:SF30	KOG1250	4.3.1.19	K01754	GO:0004794,GO:0009097	AT3G10050.1	OMR1	L-O-methylthreonine resistant 1
Glyma.15G088000.1	1.01443	0.957365	0.885726	1.15475	1.05771	1.06486	2.97761	0.930307	0.896704	-0.551906	0.197753	0.749659	PF00012	PTHR19375	KOG0100				AT1G16030.1	Hsp70b	heat shock protein 70B
Glyma.14G048200.1	19.2741	12.4457	19.486	1.15475	1.05771	2.12972	0.992536	0.930307	0.896704	0.622956	-3.55982	-4.18277	PF05922,PF00082,PF02225	PTHR10795,PTHR10795:SF17				GO:0004252,GO:0006508,GO:0042802,GO:0043086	AT2G04160.1	AIR3	Subtilisin-like serine endopeptidase family protein
Glyma.13G124600.1	87.2409	158.923	139.945	176.677	130.098	177.831	166.746	150.71	168.58	-0.00424903	0.32781	0.332059	PF00176,PF00271	PTHR10799,PTHR10799:SF49	KOG0387		K10841	GO:0003677,GO:0005524,GO:0003676,GO:0004386	AT2G18760.1	CHR8	chromatin remodeling 8
Glyma.07G155200.1	228.246	201.047	155.002	249.427	155.483	152.275	211.41	284.674	238.523	-0.398818	-0.0685418	0.330276	PF00210	PTHR11431:SF8,PTHR11431	KOG2332	1.16.3.1	K00522	GO:0008199,GO:0006879	AT5G01600.1	ATFER1,FER1	ferretin 1
Glyma.05G067400.1	821.687	703.663	822.84	1112.03	1181.46	880.638	1054.07	1047.53	987.271	0.0392796	0.43481	0.39553	PF01780	PTHR11517	KOG0402		K02921	GO:0003735,GO:0006412,GO:0005622,GO:0005840	AT3G10950.1		Zinc-binding ribosomal protein family protein
Glyma.11G155300.1	24.3463	34.4651	23.9146	31.1784	23.2695	24.4918	17.8656	13.0243	22.4176	0.566411	-0.0675909	-0.634002							AT4G19160.2
Glyma.05G210700.1	5.07214	4.78682	4.42863	1.15475	1.05771	1.06486	0.992536	0.930307	1.79341	-0.181331	-2.12418	-1.94284
Glyma.14G217600.1	50.7214	67.9729	56.6865	27.7141	17.981	30.8809	57.5671	58.6094	47.5253	-1.0961	-1.19553	-0.0994211	PF03141	PTHR10108,PTHR10108:SF434				GO:0008168,GO:0008152	AT3G27230.1		S-adenosyl-L-methionine-dependent methyltransferases superfamily protein
Glyma.17G255600.1	1213.26	734.299	930.012	1279.47	1216.36	1022.26	1084.84	918.213	934.365	0.260245	0.289944	0.0296998	PF00125	PTHR11426				GO:0003677	AT5G10980.1		Histone superfamily protein
Glyma.14G202500.1	3.04329	0.957365	1.77145	4.61902	7.40394	14.908	19.8507	27.9092	11.6571	-1.14161	2.2221	3.36371							AT1G21480.1		Exostosin family protein
Glyma.06G169100.1	16.2309	23.9341	8.85726	8.08328	10.5771	8.51887	28.7835	30.7001	19.7275	-1.5432	-0.850933	0.692267	PF04185			3.1.4.3	K01114	GO:0016788	AT3G48610.1	NPC6	non-specific phospholipase C6
Glyma.05G146700.1	167.381	96.6938	89.4583	75.0591	63.4623	62.8267	102.231	123.731	99.5341	-0.692949	-0.812153	-0.119204	PF06645	PTHR13202	KOG4112			GO:0008233,GO:0006465,GO:0005787,GO:0016021	AT4G40042.1		Microsomal signal peptidase 12 kDa subunit (SPC12)
Glyma.17G019000.1	2.02886	0.957365	0.885726	3.46426	3.17312	5.3243	3.97014	0.930307	2.69011	0.656141	1.62729	0.971147							AT5G18980.1		ARM repeat superfamily protein
Glyma.18G204600.1	21.303	20.1047	31.8861	13.8571	5.28853	4.25944	34.7388	37.2123	31.3846	-2.14245	-1.64687	0.495575	PF00560	PTHR24420:SF473,PTHR24420	KOG0472			GO:0005515	AT2G33060.1	AtRLP27,RLP27	receptor like protein 27
Glyma.13G009300.1	15.2164	32.5504	36.3148	42.7259	32.7889	33.0106	24.8134	33.4911	39.455	0.150725	0.368171	0.217446	PF06203					GO:0005515	AT3G07650.1	COL9	CONSTANS-like 9
Glyma.U003400.1	624.888	260.403	296.718	1125.89	809.145	663.407	411.902	303.28	338.954	1.30158	1.1364	-0.16518		PTHR12126:SF2,PTHR12126					AT5G10730.1		NAD(P)-binding Rossmann-fold superfamily protein
Glyma.11G030600.1	5.07214	0.957365	1.77145	4.61902	3.17312	1.06486	3.97014	3.72123	0.896704	0.0444823	0.183166	0.138683	PF02365					GO:0003677,GO:0006355	AT1G12260.1	ANAC007,EMB2749,NAC007,VND4	NAC 007
Glyma.07G028900.1	48.6926	39.252	30.1147	42.7259	20.0964	24.4918	8.93282	13.0243	9.86374	1.45624	-0.435224	-1.89147	PF00561	PTHR10992,PTHR10992:SF24	KOG1454				AT1G52510.1		alpha/beta-Hydrolases superfamily protein
Glyma.17G030900.1	17.2453	10.531	11.5144	11.5475	10.5771	8.51887	13.8955	17.6758	16.1407	-0.638772	-0.358609	0.280163	PF00320	PTHR10071				GO:0003700,GO:0008270,GO:0043565,GO:0006355	AT3G16870.1	GATA17	GATA transcription factor 17
Glyma.09G258900.1	200.857	112.969	115.144	314.093	273.946	244.918	106.201	134.895	112.985	1.23416	0.957364	-0.2768	PF01466,PF03931	PTHR11165,PTHR11165:SF5	KOG1724			GO:0006511	AT3G61415.1	ASK21,SK21	SKP1-like 21
Glyma.07G051600.1	40.5771	65.1008	69.0866	58.8925	77.2125	60.697	43.6716	63.2609	60.9759	0.229071	0.171332	-0.057739	PF00069	PTHR24349:SF13,PTHR24349	KOG0032			GO:0004672,GO:0005524,GO:0006468,GO:0016773,GO:0009103,GO:0016020	AT2G46700.1	ATCRK3,CRK3	CDPK-related kinase 3
Glyma.08G270600.1	4.05771	3.82946	2.65718	3.46426	1.05771	2.12972	5.95522	9.30307	2.69011	-1.43206	-0.664678	0.767385	PF01073	PTHR10366,PTHR10366:SF9	KOG1502			GO:0003854,GO:0016616,GO:0006694,GO:0055114,GO:0003824,GO:0050662,GO:0044237	AT2G23910.1		NAD(P)-binding Rossmann-fold superfamily protein
Glyma.19G099800.1	8.11543	22.0194	14.1716	41.5712	39.1351	43.6592	10.9179	3.72123	8.07033	2.45322	1.489	-0.964223
Glyma.06G034200.1	18.2597	18.1899	11.5144	1.15475	4.23082	13.8432	10.9179	16.7455	5.38022	-0.781108	-1.31869	-0.537582		PTHR13286:SF4,PTHR13286				GO:0005515	AT1G19330.2
Glyma.06G098900.1	324.617	456.663	365.805	400.7	347.985	450.435	207.44	253.044	220.589	0.816096	0.0640043	-0.752092	PF00069	PTHR24349	KOG0032			GO:0004672,GO:0005524,GO:0006468,GO:0016773,GO:0009103,GO:0016020	AT1G12680.1	PEPKR2	phosphoenolpyruvate carboxylase-related kinase 2
Glyma.03G262600.1	2.02886	6.70155	2.65718	6.92853	6.34623	8.51887	4.96268	7.44246	7.17363	0.154617	0.936445	0.781828	PF00702,PF00690,PF00122	PTHR24093,PTHR24093:SF61	KOG0205	3.6.3.6	K01535	GO:0000166,GO:0046872	AT1G17260.1	AHA10	autoinhibited H(+)-ATPase isoform 10
Glyma.14G139700.1	69.9956	63.1861	58.4579	61.202	60.2892	53.243	78.4103	76.2852	96.844	-0.525623	-0.133234	0.39239	PF12498	PTHR22952,PTHR22952:SF6					AT5G24800.1	ATBZIP9,BZIP9,BZO2H2	basic leucine zipper 9
Glyma.10G067400.1	65.9379	83.2907	81.4868	77.3686	71.924	70.2807	68.485	66.9821	84.2901	-0.00120845	-0.0714119	-0.0702035	PF00069	PTHR24352,PTHR24352:SF88	KOG0610			GO:0004672,GO:0005524,GO:0006468	AT2G36350.1		Protein kinase superfamily protein
Glyma.05G130300.1	312.444	211.578	245.346	247.118	247.503	198.064	93.2984	84.658	89.6704	1.37198	-0.151475	-1.52345	PF03876,PF00575	PTHR12709	KOG3298			GO:0003723,GO:0003899,GO:0006351	AT5G59180.1	NRPB7	DNA-directed RNA polymerase II
Glyma.16G038900.1	936.318	991.83	930.012	1113.18	897.992	1016.94	706.686	815.88	778.339	0.39622	0.0833339	-0.312886	PF00023,PF00415	PTHR22870:SF6,PTHR22870	KOG1427			GO:0005515	AT3G03790.2		ankyrin repeat family protein / regulator of chromosome condensation (RCC1) family protein
Glyma.19G127300.1	15.2164	9.57365	15.9431	11.5475	17.981	13.8432	9.92536	7.44246	2.69011	1.11258	0.0905511	-1.02203	PF00134,PF02984	PTHR10177,PTHR10177:SF24	KOG0653			GO:0005634	AT5G06150.1	CYC1BAT,CYCB1;2	Cyclin family protein
Glyma.01G213100.1	4.05771	1.91473	4.42863	10.3928	24.3272	6.38915	2.97761	4.65154	0.896704	2.26955	1.98273	-0.286817	PF03479						AT2G45430.1	AHL22	AT-hook motif nuclear-localized protein 22
Glyma.14G055400.1	63.909	44.0388	58.4579	84.2971	83.5587	64.9564	60.5447	42.7941	39.455	0.705234	0.484462	-0.220772							AT2G40390.1
Glyma.19G113300.1	30.4329	28.7209	30.1147	42.7259	45.4813	51.1132	46.6492	50.2366	42.1451	0.0030025	0.642185	0.639182	PF03016	PTHR11062:SF31,PTHR11062	KOG1021				AT4G38040.1		Exostosin family protein
Glyma.17G114100.1	203.9	133.074	143.488	185.916	186.156	145.886	216.373	157.222	211.622	-0.176138	0.108413	0.28455	PF00444	PTHR18804	KOG4122		K02919	GO:0003735,GO:0006412,GO:0005622,GO:0005840	AT5G20180.1		Ribosomal protein L36
Glyma.15G037600.1	42.606	51.6977	34.5433	41.5712	48.6545	53.243	12.903	18.6061	14.3473	1.64554	0.155076	-1.49047	PF01694	PTHR22936	KOG2289			GO:0004252,GO:0016021	AT2G29050.1	ATRBL1,RBL1	RHOMBOID-like 1
Glyma.14G087400.1	16.2309	17.2326	19.486	113.166	136.444	159.729	98.2611	90.2398	121.952	0.398923	2.95061	2.55169		PTHR10366:SF164,PTHR10366	KOG1430				AT4G24220.1	AWI31,VEP1	NAD(P)-binding Rossmann-fold superfamily protein
Glyma.10G291200.1	477.796	613.671	530.55	359.129	386.063	341.82	668.969	526.554	639.35	-0.755314	-0.577422	0.177892	PF02492,PF07683	PTHR13748:SF11,PTHR13748	KOG2743				AT1G80480.1	PTAC17	plastid transcriptionally active 17
Glyma.18G154100.1	7.101	8.61628	6.20008	20.7856	39.1351	18.1026	26.7985	20.4668	27.7978	0.0558022	1.83183	1.77603	PF03101						AT4G12850.1		Far-red impaired responsive (FAR1) family protein
Glyma.09G122800.1	7.101	8.61628	11.5144	16.1666	10.5771	19.1675	7.94029	10.2334	12.5539	0.579311	0.753554	0.174243							AT5G25500.1
Glyma.20G059200.1	6.08657	2.87209	6.20008	1.15475	1.05771	1.06486	2.97761	12.094	6.27693	-2.70355	-2.20956	0.493986	PF00265	PTHR11441	KOG3125	2.7.1.21	K00857	GO:0004797,GO:0005524	AT3G07800.1		Thymidine kinase
Glyma.07G008900.1	197.814	146.477	198.403	123.559	129.04	145.886	113.149	112.567	127.332	0.174659	-0.445613	-0.620271	PF00646					GO:0005515	AT1G78840.1		F-box/RNI-like/FBD-like domains-containing protein
Glyma.17G220900.1	1.01443	0.957365	0.885726	1.15475	1.05771	6.38915	0.992536	1.86061	1.79341	0.888445	1.58984	0.701399							AT4G31730.1	GDU1	glutamine dumper 1
Glyma.15G182700.1	2.02886	5.74419	1.77145	2.30951	2.11541	2.12972	0.992536	1.86061	3.58681	0.0254634	-0.542153	-0.567616						GO:0043565,GO:0006351	AT4G22600.1
Glyma.20G125900.1	25.3607	59.3566	64.658	70.44	94.1358	80.9293	57.5671	51.1669	63.666	0.509994	0.716811	0.206817	PF01535	PTHR24015					AT1G71060.1		Tetratricopeptide repeat (TPR)-like superfamily protein
Glyma.05G035100.1	437.219	694.089	617.351	637.425	618.758	684.704	431.753	408.405	479.736	0.556293	0.150467	-0.405827	PF08711	PTHR15141,PTHR15141:SF6				GO:0003677,GO:0006351,GO:0005634	AT3G48050.1		BAH domain ;TFIIS helical bundle-like domain
Glyma.17G226300.1	24.3463	52.6551	40.7434	27.7141	27.5003	54.3078	48.6343	46.5154	39.455	-0.297503	-0.104438	0.193065	PF00063	PTHR13140:SF36,PTHR13140				GO:0003774,GO:0005524,GO:0016459	AT4G33200.1	ATXI-I,XI-15,XI-I	myosin, putative
Glyma.19G161300.1	10.1443	17.2326	10.6287	5.77377	13.7502	8.51887	14.888	25.1183	17.9341	-1.04694	-0.438579	0.608359	PF00646	PTHR23125,PTHR23125:SF123	KOG4341			GO:0005515	AT3G54650.1	FBL17	RNI-like superfamily protein
Glyma.05G165300.1	508.229	734.299	598.751	927.268	885.3	865.73	687.827	605.63	752.334	0.388657	0.540609	0.151952	PF06972	PTHR12758:SF13,PTHR12758					AT1G29370.1		Kinase-related protein of unknown function (DUF1296)
Glyma.15G001100.1	73.0389	56.4845	81.4868	12.7023	26.4426	36.2052	72.4551	83.7277	61.8726	-1.53301	-1.48563	0.0473817	PF00097	PTHR23012	KOG1609			GO:0008270	AT1G50440.1		RING/FYVE/PHD zinc finger superfamily protein
Glyma.04G201200.1	52.7503	67.0155	84.144	85.4519	57.1161	59.6321	32.7537	31.6304	41.2484	0.93673	-0.0121476	-0.948877	PF04059,PF00076	PTHR24011:SF200,PTHR24011	KOG4660			GO:0003676	AT5G07290.1	AML4,ML4	MEI2-like 4
Glyma.03G232800.1	327.66	435.601	451.72	696.317	664.239	639.98	381.134	342.353	372.132	0.868641	0.719452	-0.149189	PF00514,PF01749	PTHR23316	KOG0166			GO:0005515,GO:0008565,GO:0006606,GO:0005634,GO:0005737	AT4G16143.1	IMPA-2	importin alpha isoform 2
Glyma.06G322000.1	40.5771	11.4884	21.2574	20.7856	15.8656	10.6486	15.8806	19.5365	21.5209	-0.267557	-0.632432	-0.364875							AT5G56170.1	LLG1	LORELEI-LIKE-GPI-ANCHORED PROTEIN 1
Glyma.17G197500.1	8.11543	3.82946	5.31436	5.77377	8.46164	3.19458	9.92536	17.6758	11.6571	-1.17143	0.0142029	1.18563	PF10533,PF03106					GO:0003700,GO:0043565,GO:0006355	AT4G31550.1	ATWRKY11,WRKY11	WRKY DNA-binding protein 11
Glyma.14G031800.1	54.7792	62.2287	23.9146	51.964	35.962	42.5944	24.8134	10.2334	6.27693	1.65923	-0.110627	-1.76986	PF01789					GO:0005509,GO:0015979,GO:0009523,GO:0009654,GO:0019898	AT1G06680.1	OE23,OEE2,PSBP-1,PSII-P	photosystem II subunit P-1
Glyma.12G014000.1	74.0533	70.845	64.658	211.32	187.214	172.507	106.201	103.264	83.3934	0.963389	1.44626	0.482868		PTHR15572					AT5G17510.1
Glyma.16G149400.1	35.505	33.5078	26.5718	8.08328	6.34623	2.12972	6.94775	7.44246	9.86374	-0.550584	-2.52914	-1.97856	PF00067					GO:0005506,GO:0009055,GO:0016705,GO:0020037,GO:0055114	AT4G37360.1	CYP81D2	cytochrome P450, family 81, subfamily D, polypeptide 2
Glyma.01G161500.1	6235.69	4612.58	4505.69	8093.68	4576.69	4225.36	838.693	475.387	842.005	2.97017	0.138047	-2.83213	PF00581	PTHR13253:SF26,PTHR13253	KOG1530				AT4G35770.1	ATSEN1,DIN1,SEN1	Rhodanese/Cell cycle control phosphatase superfamily protein
Glyma.11G212100.1	1.01443	1.91473	1.77145	2.30951	5.28853	1.06486	2.97761	6.51215	1.79341	-0.381251	0.882001	1.26325							AT3G52870.1		IQ calmodulin-binding motif family protein
Glyma.12G193500.1	16.2309	25.8488	18.6002	9.23804	23.2695	10.6486	17.8656	17.6758	15.244	-0.234849	-0.491654	-0.256805	PF00107	PTHR11695,PTHR11695:SF5	KOG1196			GO:0008270,GO:0016491,GO:0055114	AT5G16970.1	AER,AT-AER	alkenal reductase
Glyma.16G147200.1	5.07214	0.957365	8.85726	4.61902	2.11541	2.12972	2.97761	3.72123	0.896704	0.222829	-0.747977	-0.970806	PF00010	PTHR12565,PTHR12565:SF7				GO:0046983	AT3G26744.1	ATICE1,ICE1,SCRM	basic helix-loop-helix (bHLH) DNA-binding superfamily protein
Glyma.17G024800.1	57.8224	51.6977	55.8007	49.6545	76.1548	96.9022	76.4253	75.3549	73.5297	-0.0167348	0.429907	0.446642	PF07496	PTHR23336:SF6,PTHR23336				GO:0008270	AT3G62900.1		CW-type Zinc Finger
Glyma.10G008000.1	426.06	444.217	354.29	378.76	369.139	282.188	266.992	295.838	277.081	0.294457	-0.249507	-0.543964	PF00176,PF00271	PTHR10799:SF164,PTHR10799				GO:0003677,GO:0005524,GO:0003676,GO:0004386	AT5G43530.1		Helicase protein with RING/U-box domain
Glyma.10G218400.1	28.404	45.9535	69.9724	69.2853	74.0394	110.745	50.6193	40.0032	40.3517	0.955943	0.815856	-0.140087	PF01504,PF00118	PTHR23086,PTHR23086:SF7	KOG0230			GO:0005524,GO:0044267,GO:0016307,GO:0046488	AT1G34260.1	FAB1D	FORMS APLOID AND BINUCLEATE CELLS 1A
Glyma.18G080700.1	71.01	55.5272	35.429	136.261	150.194	135.237	66.4999	40.0032	69.9429	1.25696	1.3805	0.123534	PF03004
Glyma.14G156400.1	19933.5	23553.1	18518.8	11735.8	10161.4	10763.6	16072.1	16379	16305.7	-0.578045	-0.924835	-0.34679	PF08240,PF00107	PTHR11695,PTHR11695:SF4	KOG0022			GO:0008270,GO:0016491,GO:0055114	AT1G77120.1	ADH,ADH1,ATADH,ATADH1	alcohol dehydrogenase 1
Glyma.14G023200.1	7.101	2.87209	2.65718	5.77377	8.46164	10.6486	2.97761	7.44246	14.3473	0.00678089	0.978333	0.971552	PF05739,PF09177	PTHR12380	KOG3202			GO:0005515,GO:0048193,GO:0016020	AT1G28490.1	ATSYP61,OSM1,SYP61	syntaxin of plants 61
Glyma.11G213000.1	6.08657	15.3178	16.8288	15.0118	14.8079	26.6215	34.7388	32.5608	25.1077	-0.711258	0.561922	1.27318	PF00282	PTHR11999,PTHR11999:SF1	KOG1383			GO:0008152,GO:0016831,GO:0030170,GO:0019752	AT5G17330.1	GAD,GAD1	glutamate decarboxylase
Glyma.03G181400.1	468.666	614.628	543.836	448.045	388.178	392.933	342.425	298.629	341.644	0.322848	-0.404662	-0.72751	PF01566	PTHR11706,PTHR11706:SF4	KOG1291			GO:0005215,GO:0006810,GO:0016020	AT5G03280.1	ATEIN2,CKR1,EIN2,ERA3,ORE2,ORE3,PIR2	NRAMP metal ion transporter family protein
Glyma.20G191000.1	40.5771	30.6357	40.7434	32.3331	33.8466	37.2701	39.7014	21.3971	29.5912	0.18992	-0.114004	-0.303924	PF10189	PTHR13587,PTHR13587:SF3	KOG4262		K13140		AT4G14590.1	emb2739	embryo defective 2739
Glyma.10G009100.1	61.8802	76.5892	54.0293	53.1187	68.7509	55.3727	59.5522	50.2366	49.3187	0.155721	-0.119125	-0.274847	PF07714	PTHR24420,PTHR24420:SF870	KOG1187			GO:0004672,GO:0005524,GO:0006468	AT3G62220.1		Protein kinase superfamily protein
Glyma.12G174300.1	1.01443	0.957365	4.42863	2.30951	5.28853	2.12972	1.98507	0.930307	1.79341	1.04675	0.60394	-0.442812							AT5G19200.1		NAD(P)-binding Rossmann-fold superfamily protein
Glyma.18G166600.1	2.02886	2.87209	3.5429	290.998	374.428	359.922	3.97014	0.930307	2.69011	7.07769	6.924	-0.153695	PF10510	PTHR21072,PTHR21072:SF5	KOG2459			GO:0016255,GO:0042765	AT3G07180.1		GPI transamidase component PIG-S-related
Glyma.15G132500.1	25.3607	14.3605	22.1432	8.08328	7.40394	8.51887	4.96268	23.2577	9.86374	-0.665788	-1.36571	-0.699919	PF04116	PTHR12863	KOG0539			GO:0005506,GO:0016491,GO:0006633,GO:0055114	AT2G34770.1	ATFAH1,FAH1	fatty acid hydroxylase 1
Glyma.14G157500.1	84.1976	50.7403	93.887	83.1423	71.924	90.513	48.6343	53.9578	65.4594	0.547286	0.101945	-0.445341							AT5G16020.1	GEX3	gamete-expressed 3
Glyma.13G137200.1	4.05771	1.91473	0.885726	1.15475	1.05771	1.06486	4.96268	1.86061	0.896704	-1.23608	-1.06531	0.170777							AT2G37080.1	RIP3	ROP interactive partner 3
Glyma.16G063200.1	37.5339	50.7403	27.4575	33.4879	48.6545	20.2323	71.4626	82.7974	56.4923	-1.04169	-0.176925	0.864764	PF00479,PF02781	PTHR23429	KOG0563	1.1.1.49	K00036	GO:0004345,GO:0050661,GO:0006006,GO:0055114	AT5G40760.1	G6PD6	glucose-6-phosphate dehydrogenase 6
Glyma.11G137100.1	897.769	1044.48	1071.73	1567	1766.37	1833.69	1665.48	1429.88	1793.41	0.079873	0.777672	0.697799	PF00806,PF07990	PTHR12537:SF12,PTHR12537	KOG1488			GO:0003723	AT2G29190.1	APUM2,PUM2	pumilio 2
Glyma.20G000700.1	348.963	519.849	446.406	370.676	350.101	390.803	425.798	394.45	501.257	-0.249571	-0.24269	0.00688007		PTHR10887:SF5,PTHR10887	KOG1806		K12874		AT2G38770.1	EMB2765	P-loop containing nucleoside triphosphate hydrolases superfamily protein
Glyma.11G053600.1	1033.7	1082.78	788.296	2393.81	2233.87	2046.66	922.066	697.731	827.658	1.44734	1.2002	-0.247147	PF00847					GO:0003700,GO:0006355	AT5G67190.1	DEAR2	DREB and EAR motif protein 2
Glyma.13G284700.1	2.02886	1.91473	0.885726	3.46426	11.6348	2.12972	0.992536	2.79092	2.69011	1.41218	1.83493	0.422743							AT5G54540.1		Uncharacterised conserved protein (UCP012943)
Glyma.01G131500.1	28.404	41.1667	35.429	140.88	95.1935	99.0319	78.4103	54.8881	75.3231	0.683727	1.67423	0.990503	PF00069,PF03822	PTHR24343,PTHR24343:SF45	KOG0583			GO:0004672,GO:0005524,GO:0006468,GO:0007165	AT5G58380.1	CIPK10,PKS2,SIP1,SNRK3.8	SOS3-interacting protein 1
Glyma.11G153300.1	5.07214	0.957365	2.65718	1.15475	1.05771	1.06486	3.97014	0.930307	1.79341	-1.03032	-1.40629	-0.375968
Glyma.20G151400.1	40.5771	48.8256	38.0862	43.8807	40.1928	52.1781	56.5745	45.5851	67.2528	-0.314266	0.0959006	0.410167	PF08699,PF02170,PF02171	PTHR22891	KOG1041		K11596	GO:0005515	AT5G43810.1	AGO10,PNH,ZLL	Stabilizer of iron transporter SufD / Polynucleotidyl transferase
Glyma.04G233400.1	20.2886	38.2946	39.8577	17.3213	13.7502	28.7512	29.7761	41.8638	26.0044	-0.706843	-0.718564	-0.0117209	PF00400	PTHR14221	KOG0283			GO:0005515	AT5G24320.1		Transducin/WD40 repeat-like superfamily protein
Glyma.09G235600.1	37.5339	27.7636	15.0573	28.8689	37.0197	25.5566	8.93282	15.8152	20.6242	1.0111	0.186523	-0.824574	PF00249	PTHR10641	KOG0048			GO:0003682	AT3G01140.1	AtMYB106,MYB106,NOK	myb domain protein 106
Glyma.07G107200.1	1.01443	0.957365	0.885726	1.15475	1.05771	1.06486	0.992536	0.930307	0.896704	0.217053	0.197753	-0.0193	PF04770						AT1G75240.1	AtHB33,HB33	homeobox protein 33
Glyma.15G115300.1	342.877	266.147	260.403	2.30951	1.05771	1.06486	75.4327	110.707	45.7319	-5.7092	-7.61594	-1.90674	PF00031	PTHR11413,PTHR11413:SF28				GO:0004869	AT5G47550.1		Cystatin/monellin superfamily protein
Glyma.20G234700.1	4.05771	0.957365	1.77145	1.15475	3.17312	3.19458	6.94775	7.44246	0.896704	-1.02302	0.148528	1.17155
Glyma.10G177300.1	44.6349	51.6977	42.5149	76.2138	70.8663	73.4753	51.6119	24.188	27.7978	1.09015	0.667641	-0.422509	PF07714,PF00560,PF08263	PTHR24420	KOG1187			GO:0004672,GO:0005524,GO:0006468,GO:0005515	AT5G51560.1		Leucine-rich repeat protein kinase family protein
Glyma.12G083600.1	296.213	291.996	259.518	296.772	307.792	289.642	178.656	148.849	195.481	0.773832	0.0770072	-0.696825	PF00026	PTHR13683,PTHR13683:SF98	KOG1339			GO:0004190,GO:0006508	AT5G22850.1		Eukaryotic aspartyl protease family protein
Glyma.14G193500.1	485.911	632.818	553.579	491.926	587.027	589.932	468.477	371.193	502.154	0.314689	-0.00295701	-0.317646	PF00294	PTHR10584:SF15,PTHR10584	KOG2855				AT5G58730.1		pfkB-like carbohydrate kinase family protein
Glyma.U010500.1	422.002	568.675	441.092	404.164	396.64	430.203	506.193	387.008	446.558	-0.122135	-0.21796	-0.0958242	PF07646,PF00149	PTHR11668:SF17,PTHR11668	KOG0374			GO:0016787,GO:0005515	AT1G08420.1	BSL2	BRI1 suppressor 1 (BSU1)-like 2
Glyma.13G100800.1	218.102	263.275	245.346	369.522	338.466	358.858	289.82	200.946	293.222	0.444445	0.553872	0.109427	PF00013	PTHR10288,PTHR10288:SF53	KOG2190			GO:0003723	AT4G26000.1	PEP	RNA-binding KH domain-containing protein
Glyma.10G044300.1	9.12986	7.65892	7.08581	4.61902	9.51935	6.38915	3.97014	4.65154	6.27693	0.462382	-0.217916	-0.680298	PF01960	PTHR23100	KOG2786	2.3.1.1,2.3.1.35	K00620	GO:0004358,GO:0006526	AT2G37500.1		arginine biosynthesis protein ArgJ family
Glyma.20G181200.1	123.76	124.457	104.516	168.594	186.156	134.172	151.858	131.173	135.402	0.224608	0.471028	0.24642	PF05180	PTHR20922				GO:0008270	AT3G54826.1		Zim17-type zinc finger protein
Glyma.05G079800.1	15.2164	14.3605	16.8288	15.0118	4.23082	8.51887	7.94029	7.44246	8.96704	0.189177	-0.741216	-0.930393	PF00170	PTHR22952:SF45,PTHR22952				GO:0003700,GO:0043565,GO:0006355	AT3G56850.1	AREB3,DPBF3	ABA-responsive element binding protein 3
Glyma.06G141200.1	80.1399	76.5892	54.0293	26.5594	32.7889	41.5295	84.3656	98.6126	63.666	-1.28982	-1.06298	0.226841	PF03283	PTHR10992,PTHR10992:SF56	KOG1454				AT3G10870.1	ATMES17,MES17	methyl esterase 17
Glyma.10G245500.1	14.202	35.4225	19.486	20.7856	27.5003	24.4918	20.8433	26.9789	15.244	0.206631	0.074592	-0.132039	PF03638	PTHR12446:SF4,PTHR12446	KOG1171				AT4G14770.1	ATTCX2,TCX2	TESMIN/TSO1-like CXC 2
Glyma.10G049200.1	143.034	273.806	235.603	263.284	337.408	248.112	308.679	201.877	249.284	0.159738	0.379578	0.21984	PF01535	PTHR24015					AT3G09650.1	CRM3,HCF152	Tetratricopeptide repeat (TPR)-like superfamily protein
Glyma.06G154300.1	3.04329	1.91473	3.5429	2.30951	1.05771	2.12972	0.992536	2.79092	4.48352	-0.588733	-0.628992	-0.0402592	PF00676	PTHR11516:SF1,PTHR11516				GO:0016624,GO:0008152	AT1G21400.1		Thiamin diphosphate-binding fold (THDP-binding) superfamily protein
Glyma.04G039800.1	715.172	1064.59	937.098	889.161	810.202	841.239	638.201	563.766	654.594	0.452538	-0.0967696	-0.549308	PF00097	PTHR14155,PTHR14155:SF18				GO:0046872,GO:0008270,GO:0005515	AT5G42940.1		RING/U-box superfamily protein
Glyma.10G243700.1	16.2309	22.9768	17.7145	8.08328	15.8656	7.45401	22.8283	16.7455	17.9341	-0.872864	-0.858093	0.0147712	PF00248	PTHR11732:SF12,PTHR11732	KOG1575				AT1G60710.1	ATB2	NAD(P)-linked oxidoreductase superfamily protein
Glyma.11G006600.1	1168.62	1130.65	1219.64	1668.62	1738.87	1573.86	1538.43	1425.23	1484.04	0.163475	0.501406	0.337931	PF01015	PTHR11830	KOG1628		K02984	GO:0003735,GO:0006412,GO:0005622,GO:0005840	AT4G34670.1		Ribosomal protein S3Ae
Glyma.08G330900.1	24.3463	25.8488	37.2005	39.2617	43.3659	35.1404	47.6417	53.0275	34.0747	-0.194274	0.430314	0.624588	PF00650	PTHR23324:SF18,PTHR23324					AT1G55840.1		Sec14p-like phosphatidylinositol transfer family protein
Glyma.11G045300.1	428.089	490.171	519.921	531.187	574.334	487.705	479.395	467.014	501.257	0.138222	0.147707	0.00948417	PF01063	PTHR11825,PTHR11825:SF2	KOG0975	2.6.1.42	K00826	GO:0003824,GO:0008152	AT5G65780.1	ATBCAT-5	branched-chain amino acid aminotransferase 5 / branched-chain amino acid transaminase 5 (BCAT5)
Glyma.04G016500.1	154.193	191.473	166.516	99.3089	121.636	126.718	149.873	125.591	162.303	-0.332475	-0.558968	-0.226492	PF04564	PTHR22849				GO:0004842,GO:0016567,GO:0000151	AT1G76390.1		ARM repeat superfamily protein
Glyma.13G001000.1	461.565	553.357	514.607	429.569	429.428	475.992	451.604	383.287	364.958	0.153975	-0.196259	-0.350234	PF06814	PTHR21229,PTHR21229:SF2	KOG2569			GO:0016021,GO:0007186,GO:0019236	AT5G42090.1		Lung seven transmembrane receptor family protein
Glyma.03G218400.1	1.01443	0.957365	3.5429	6.92853	6.34623	5.3243	1.98507	0.930307	1.79341	1.9818	1.75388	-0.227926	PF01764					GO:0004806,GO:0006629	AT1G02660.1		alpha/beta-Hydrolases superfamily protein
Glyma.11G093400.1	1.01443	1.91473	1.77145	1.15475	2.11541	1.06486	0.992536	3.72123	0.896704	-0.372081	-0.116808	0.255273	PF01764	PTHR21493:SF9,PTHR21493	KOG4569			GO:0004806,GO:0006629	AT1G51440.1		alpha/beta-Hydrolases superfamily protein
Glyma.03G183500.1	286.069	360.927	326.833	782.924	742.509	833.785	604.454	480.969	539.816	0.537657	1.27657	0.738912	PF00535	PTHR10587:SF34,PTHR10587				GO:0016757	AT5G03760.1	ATCSLA09,ATCSLA9,CSLA09,CSLA9,RAT4	Nucleotide-diphospho-sugar transferases superfamily protein
Glyma.08G127700.1	25.3607	26.8062	24.8003	66.9758	41.2505	38.3349	22.8283	19.5365	37.6616	0.872957	0.929187	0.05623	PF01504,PF02493	PTHR23086,PTHR23086:SF6	KOG0229	2.7.1.68	K00889	GO:0016307,GO:0046488	AT1G10900.1		Phosphatidylinositol-4-phosphate 5-kinase family protein
Glyma.09G213300.1	14.202	11.4884	7.08581	5.77377	4.23082	4.25944	7.94029	10.2334	6.27693	-0.777488	-1.20027	-0.422779	PF04057	PTHR23273				GO:0003677,GO:0006260,GO:0005634	AT4G19130.1		Replication factor-A protein 1-related
Glyma.09G065600.1	681.696	1114.37	1102.73	1036.97	926.55	896.611	1367.71	1273.59	1445.49	-0.514887	-0.0193732	0.495514	PF00271,PF00270	PTHR24031,PTHR24031:SF2	KOG0327		K03257	GO:0003676,GO:0005524,GO:0008026,GO:0004386	AT3G13920.1	EIF4A1,RH4,TIF4A1	eukaryotic translation initiation factor 4A1
Glyma.13G019500.1	22.3174	2.87209	0.885726	16.1666	3.17312	3.19458	8.93282	2.79092	4.48352	0.47548	-0.210561	-0.686041
Glyma.03G056400.1	1854.38	1938.66	1750.19	1480.4	1125.4	1157.5	1216.85	1166.61	1198	0.0714528	-0.558731	-0.630184	PF00441,PF02771,PF02770	PTHR10909,PTHR10909:SF129	KOG0138	1.3.3.6	K00232	GO:0016627,GO:0055114,GO:0003995,GO:0050660,GO:0008152	AT3G51840.1	ACX4,ATG6,ATSCX	acyl-CoA oxidase 4
Glyma.01G156800.1	74.0533	43.0814	46.9435	94.6899	114.232	101.162	50.6193	39.0729	51.1121	1.13897	0.918274	-0.220692	PF07496,PF02518	PTHR23336,PTHR23336:SF8				GO:0005524,GO:0008270	AT4G36280.1		Histidine kinase-, DNA gyrase B-, and HSP90-like ATPase family protein
Glyma.01G087400.1	68.9812	74.6744	81.4868	161.666	158.656	126.718	90.3208	49.3063	43.9385	1.28411	0.989565	-0.294543							AT1G23780.1		F-box family protein
Glyma.02G074500.1	2.02886	0.957365	2.65718	2.30951	6.34623	2.12972	7.94029	3.72123	5.38022	-0.659985	0.934451	1.59444	PF00498	PTHR22593:SF1,PTHR22593				GO:0005515	AT1G34355.1	ATPS1,PS1	forkhead-associated (FHA) domain-containing protein
Glyma.14G055800.1	152.164	143.605	152.345	162.82	127.982	125.653	157.813	191.643	182.928	-0.354303	-0.105701	0.248602	PF07065	PTHR15323:SF6,PTHR15323	KOG2983				AT4G05440.1	EDA35	temperature sensing protein-related
Glyma.20G218700.1	90.2842	76.5892	87.6869	68.1305	67.6932	84.1239	61.5372	54.8881	69.0462	0.245962	-0.210847	-0.456809	PF00071	PTHR24073,PTHR24073:SF213	KOG0087		K07976	GO:0005525,GO:0007264,GO:0005634,GO:0005737,GO:0005622	AT5G47520.1	AtRABA5a,RABA5a	RAB GTPase homolog A5A
Glyma.03G074200.1	1.01443	0.957365	0.885726	1.15475	1.05771	1.06486	0.992536	0.930307	0.896704	0.217053	0.197753	-0.0193							AT3G54060.1
Glyma.03G129300.1	256.65	288.167	268.375	167.439	171.348	141.626	838.693	889.374	928.088	-2.46699	-0.759318	1.70767	PF08241	PTHR10108,PTHR10108:SF276	KOG3010			GO:0008168,GO:0008152	AT2G41380.1		S-adenosyl-L-methionine-dependent methyltransferases superfamily protein
Glyma.01G221200.1	1.01443	0.957365	0.885726	1.15475	1.05771	1.06486	0.992536	0.930307	0.896704	0.217053	0.197753	-0.0193	PF04749						AT4G23470.1		PLAC8 family protein
Glyma.11G179900.1	1.01443	1.91473	2.65718	1.15475	1.05771	1.06486	0.992536	0.930307	2.69011	-0.493175	-0.769386	-0.276211	PF03168						AT3G44220.1		Late embryogenesis abundant (LEA) hydroxyproline-rich glycoprotein family
Glyma.07G207000.1	6.08657	8.61628	7.97153	2.30951	4.23082	3.19458	4.96268	4.65154	6.27693	-0.706983	-1.21982	-0.512841
Glyma.08G013900.1	71.01	45.9535	45.172	53.1187	49.7122	33.0106	91.3133	91.1701	97.7407	-1.04466	-0.255276	0.789381	PF00255	PTHR11592	KOG1651	1.11.1.9	K00432	GO:0004602,GO:0006979,GO:0055114,GO:0016209,GO:0016491	AT1G63460.1	ATGPX8,GPX8	glutathione peroxidase 8
Glyma.19G115400.1	406.786	557.186	575.722	1729.82	1663.77	1599.42	1056.06	666.1	1022.24	0.863419	1.69727	0.833847	PF01327	PTHR10458					AT5G14660.1	ATDEF2,DEF2,PDF1B	peptide deformylase 1B
Glyma.19G121400.1	32.4617	36.3799	43.4006	41.5712	47.5968	39.3998	40.694	63.2609	66.3561	-0.405643	0.195914	0.601557							AT2G40980.1		Protein kinase superfamily protein
Glyma.18G139800.1	1.01443	0.957365	3.5429	1.15475	1.05771	1.06486	2.97761	1.86061	0.896704	-0.807259	-0.750765	0.0564931	PF00295,PF01535	PTHR24015				GO:0004650,GO:0005975	AT1G23460.1		Pectin lyase-like superfamily protein
Glyma.15G240100.1	3.04329	0.957365	5.31436	13.8571	13.7502	13.8432	0.992536	1.86061	0.896704	3.46648	2.15376	-1.31272	PF04640						AT1G32700.1		PLATZ transcription factor family protein
Glyma.01G157900.1	19.2741	21.062	23.0289	5.77377	15.8656	8.51887	17.8656	17.6758	9.86374	-0.590307	-1.07114	-0.480829	PF00060,PF01094,PF00497	PTHR18966:SF7,PTHR18966	KOG1052		K05387	GO:0004970,GO:0005234,GO:0016020,GO:0005215,GO:0006810	AT3G51480.1	ATGLR3.6,GLR3.6	glutamate receptor 3.6
Glyma.08G274500.1	6.08657	4.78682	11.5144	6.92853	12.6925	3.19458	16.8731	3.72123	5.38022	-0.187081	0.0273039	0.214384	PF00067	PTHR24286				GO:0005506,GO:0009055,GO:0016705,GO:0020037,GO:0055114	AT2G42850.1	CYP718	cytochrome P450, family 718
Glyma.08G147400.1	93.3274	76.5892	90.3441	136.261	161.829	117.135	82.3805	78.1458	70.8396	0.843715	0.673934	-0.169781	PF00400	PTHR14221	KOG0286			GO:0005515	AT1G48870.1		Transducin/WD40 repeat-like superfamily protein
Glyma.06G154600.1	3.04329	9.57365	11.5144	8.08328	5.28853	4.25944	7.94029	8.37277	18.8308	-0.995137	-0.452775	0.542362	PF01535	PTHR24015					AT2G21090.1		Pentatricopeptide repeat (PPR-like) superfamily protein
Glyma.05G040900.1	294.184	229.768	218.774	175.523	239.041	166.118	495.275	496.784	463.596	-1.32585	-0.355082	0.970766	PF00828	PTHR11721	KOG1742		K02900		AT1G70600.1		Ribosomal protein L18e/L15 superfamily protein
Glyma.17G091000.1	6.08657	7.65892	15.0573	24.2499	11.6348	7.45401	8.93282	9.30307	8.96704	0.671891	0.589443	-0.0824485	PF00171	PTHR11699,PTHR11699:SF46	KOG2450			GO:0016491,GO:0008152,GO:0055114	AT3G48000.1	ALDH2,ALDH2A,ALDH2B4	aldehyde dehydrogenase 2B4
Glyma.13G221600.1	16.2309	28.7209	38.0862	8.08328	17.981	21.2972	29.7761	13.9546	24.211	-0.520583	-0.810058	-0.289475	PF01535	PTHR24015,PTHR24015:SF20					AT1G30290.1		Tetratricopeptide repeat (TPR)-like superfamily protein
Glyma.07G204300.1	18.2597	17.2326	22.1432	47.3449	59.2315	38.3349	14.888	31.6304	31.3846	0.895418	1.33014	0.434725	PF01078			6.6.1.1	K03405	GO:0016851,GO:0015979,GO:0015995	AT4G18480.1	CH-42,CH42,CHL11,CHLI-1,CHLI1	P-loop containing nucleoside triphosphate hydrolases superfamily protein
Glyma.11G249500.1	764.879	888.434	808.668	961.911	977.32	807.163	596.514	449.338	625.002	0.716952	0.157719	-0.559233	PF03193	PTHR11089,PTHR11089:SF40		3.6.1.-	K06949	GO:0005525,GO:0003924	AT1G67440.1	emb1688	Minichromosome maintenance (MCM2/3/5) family protein
Glyma.04G207800.1	62.8946	42.124	69.9724	33.4879	44.4236	45.7889	60.5447	120.01	74.4264	-1.04354	-0.50043	0.543108	PF01425	PTHR11895,PTHR11895:SF7	KOG1211			GO:0016884	AT5G64440.1	AtFAAH,FAAH	fatty acid amide hydrolase
Glyma.12G146100.1	451.421	368.585	385.291	430.724	542.603	445.111	399.992	356.308	381.099	0.318565	0.234914	-0.0836506	PF00582					GO:0006950	AT1G11360.1		Adenine nucleotide alpha hydrolases-like superfamily protein
Glyma.02G227200.1	396.642	330.291	375.548	152.428	157.598	169.313	354.335	509.808	356.888	-1.34898	-1.20164	0.147348	PF11960,PF00487	PTHR19353				GO:0006629,GO:0016717,GO:0055114	AT5G05580.1	FAD8	fatty acid desaturase 8
Glyma.08G172000.1	955.592	1061.72	1047.81	1530.05	1603.48	1323.62	1279.38	899.607	1190.82	0.403455	0.540177	0.136722	PF00076	PTHR15481	KOG0126		K14325	GO:0003676	AT1G16610.1	RNPS1,SR45	arginine/serine-rich 45
Glyma.10G023700.1	37.5339	70.845	47.8292	23.0951	25.3849	50.0484	32.7537	30.7001	30.4879	0.0687732	-0.664857	-0.73363	PF12166	PTHR13167:SF1,PTHR13167	KOG1893			GO:0008381,GO:0016021	AT2G48060.1
Glyma.02G221400.1	1.01443	1.91473	0.885726	4.61902	2.11541	5.3243	2.97761	0.930307	2.69011	0.869971	1.66037	0.790395				2.7.7.6	K03046		ATCG00170.1		DNA-directed RNA polymerase family protein
Glyma.06G042900.1	55.7936	65.1008	64.658	38.1069	43.3659	52.1781	39.7014	94.8913	63.666	-0.568915	-0.473357	0.095558	PF00134,PF02984	PTHR10177,PTHR10177:SF76	KOG0656			GO:0005634	AT4G34160.1	CYCD3,CYCD3;1	CYCLIN D3;1
Glyma.07G069300.1	423.017	277.636	238.26	312.939	231.638	210.842	195.53	233.507	224.176	0.209723	-0.313716	-0.523439	PF00179	PTHR24067,PTHR24067:SF19	KOG0416	6.3.2.19	K10576	GO:0016881	AT1G63800.1	UBC5	ubiquitin-conjugating enzyme 5
Glyma.17G105300.1	96.3707	52.6551	61.1151	68.1305	60.2892	42.5944	112.157	85.5883	65.4594	-0.622067	-0.297241	0.324826							AT2G15580.2		RING/U-box superfamily protein
Glyma.17G218000.1	9.12986	12.4457	5.31436	17.3213	20.0964	15.9729	7.94029	10.2334	11.6571	0.839783	0.989519	0.149736		PTHR23315:SF38,PTHR23315					AT4G31890.1		ARM repeat superfamily protein
Glyma.18G160900.1	7.101	2.87209	0.885726	3.46426	4.23082	4.25944	3.97014	2.79092	9.86374	-0.475781	0.138689	0.61447							AT3G24840.1		Sec14p-like phosphatidylinositol transfer family protein
Glyma.19G148300.1	1.01443	0.957365	2.65718	1.15475	3.17312	7.45401	2.97761	4.65154	5.38022	-0.14298	1.34781	1.49079	PF07649,PF03107	PTHR13871:SF2,PTHR13871				GO:0047134,GO:0055114	AT5G45730.1		Cysteine/Histidine-rich C1 domain family protein
Glyma.06G003800.1	3.04329	6.70155	4.42863	1.15475	6.34623	9.58373	3.97014	8.37277	8.07033	-0.256799	0.269514	0.526312	PF00249	PTHR10641	KOG0048		K09422	GO:0003682	AT4G38620.1	ATMYB4,MYB4	myb domain protein 4
Glyma.18G144900.1	15.2164	5.74419	9.74299	2.30951	6.34623	7.45401	10.9179	14.8849	9.86374	-1.14664	-0.930473	0.216164							AT1G67910.1
Glyma.03G239500.1	53.7647	74.6744	75.2867	84.2971	102.597	161.859	119.104	92.1004	86.0836	0.230344	0.775577	0.545233	PF01699	PTHR12266	KOG2399			GO:0055085,GO:0016021	AT1G08960.1	ATCAX11,CAX11	cation exchanger 11
Glyma.02G220500.1	6.08657	4.78682	5.31436	2.30951	5.28853	5.3243	3.97014	8.37277	4.48352	-0.380862	-0.325036	0.0558263	PF01988						AT4G27870.1		Vacuolar iron transporter (VIT) family protein
Glyma.15G022000.1	3.04329	0.957365	1.77145	1.15475	1.05771	1.06486	0.992536	1.86061	5.38022	-1.32897	-0.816581	0.512387	PF00010	PTHR12565				GO:0046983	AT3G21330.1		basic helix-loop-helix (bHLH) DNA-binding superfamily protein
Glyma.11G050600.1	61.8802	68.9303	68.2009	49.6545	62.4046	44.7241	39.7014	33.4911	41.2484	0.454168	-0.34408	-0.798248	PF00226	PTHR24076					AT4G37480.1		Chaperone DnaJ-domain superfamily protein
Glyma.19G189800.1	20.2886	15.3178	15.0573	6.92853	3.17312	18.1026	3.97014	9.30307	3.58681	0.742305	-0.845041	-1.58735	PF08569	PTHR10182					AT5G18940.1		Mo25 family protein
Glyma.20G006500.1	51.7359	58.3992	44.2863	161.666	187.214	248.112	64.5148	90.2398	47.5253	1.56136	1.95084	0.38948							AT1G20970.1
Glyma.14G219800.1	40.5771	40.2093	34.5433	64.6663	68.7509	62.8267	23.8209	7.44246	26.0044	1.77685	0.766882	-1.00997							AT1G75810.1
Glyma.04G033300.1	269.838	221.151	209.917	275.986	249.619	257.696	268.977	201.877	242.11	0.135737	0.160345	0.0246073	PF12171	PTHR10593				GO:0046872	AT5G66730.1		C2H2-like zinc finger protein
Glyma.02G236600.1	2969.23	2437.45	1940.63	6154.84	5089.68	5194.38	5057.96	4494.31	3751.81	0.305245	1.16183	0.856581	PF07765						AT5G58320.2		Kinase interacting (KIP1-like) family protein
Glyma.08G167700.1	1.01443	0.957365	0.885726	1.15475	2.11541	7.45401	0.992536	1.86061	0.896704	1.51596	1.90803	0.392071	PF04083	PTHR11005	KOG2624			GO:0006629	AT5G14180.1	MPL1	Myzus persicae-induced lipase 1
Glyma.17G113600.1	199.842	198.175	212.574	105.083	159.714	108.616	218.358	280.953	274.391	-1.05101	-0.709439	0.341571		PTHR23083:SF102,PTHR23083				GO:0005515	AT5G20190.1		Tetratricopeptide repeat (TPR)-like superfamily protein
Glyma.06G297400.1	68.9812	60.314	43.4006	32.3331	38.0774	30.8809	27.791	65.1215	32.2813	-0.305651	-0.76972	-0.464069
Glyma.13G222200.1	700.97	587.822	590.779	263.284	295.1	290.707	591.551	749.828	587.341	-1.18365	-1.14641	0.03724	PF06201	PTHR12175	KOG1730				AT2G25950.1		Protein of unknown function (DUF1000)
Glyma.05G047900.1	22.3174	16.2752	27.4575	4.61902	4.23082	2.12972	29.7761	30.7001	26.0044	-2.97756	-2.58874	0.388815	PF00149	PTHR22953	KOG1378			GO:0016787	AT5G50400.1	ATPAP27,PAP27	purple acid phosphatase 27
Glyma.03G195900.1	63.909	57.4419	48.7149	40.4164	35.962	34.0755	109.179	113.497	86.0836	-1.48304	-0.622649	0.860393	PF00583	PTHR13355	KOG3396	2.3.1.4	K00621	GO:0008080	AT5G15770.1	AtGNA1,GNA1	glucose-6-phosphate acetyltransferase 1
Glyma.05G190200.1	30.4329	43.0814	43.4006	13.8571	2.11541	5.3243	1.98507	4.65154	2.69011	1.19119	-2.45675	-3.64794	PF01501	PTHR11183:SF7,PTHR11183	KOG1950			GO:0016757	AT3G18660.2	GUX1,PGSIP1	plant glycogenin-like starch initiation protein 1
Glyma.17G206900.1	6.08657	3.82946	6.20008	16.1666	8.46164	4.25944	7.94029	7.44246	9.86374	0.19437	0.841949	0.647579
Glyma.15G167500.1	591.412	687.388	658.98	677.841	712.894	795.45	562.768	490.272	597.205	0.405735	0.17401	-0.231725	PF00689,PF12515,PF00702,PF00122,PF00690	PTHR24093:SF73,PTHR24093	KOG0204	3.6.3.8	K01537	GO:0000166,GO:0046872,GO:0005516	AT5G57110.1	ACA8,AT-ACA8	autoinhibited Ca2+ -ATPase, isoform 8
Glyma.07G043900.1	83.1832	79.4613	79.7153	70.44	95.1935	76.6699	68.485	53.9578	60.0791	0.408745	-0.000335588	-0.40908	PF02383	PTHR11200,PTHR11200:SF9	KOG1888			GO:0042578	AT3G14205.1		Phosphoinositide phosphatase family protein
Glyma.20G130200.1	1.01443	0.957365	2.65718	1.15475	2.11541	2.12972	1.98507	1.86061	2.69011	-0.275435	0.222237	0.497672							AT3G19500.1		basic helix-loop-helix (bHLH) DNA-binding superfamily protein
Glyma.18G002700.1	126.804	152.221	178.917	86.6066	133.271	137.367	179.649	120.01	164.097	-0.376453	-0.358251	0.0182016	PF10294	PTHR21095	KOG2920				AT4G14000.1		Putative methyltransferase family protein
Glyma.08G056700.1	1.01443	0.957365	0.885726	1.15475	1.05771	1.06486	3.97014	5.58184	1.79341	-1.79152	0.197753	1.98927	PF04770						AT1G75240.1	AtHB33,HB33	homeobox protein 33
Glyma.02G230000.1	34.4906	41.1667	49.6007	93.5351	102.597	94.7725	69.4775	28.8395	55.5956	0.918436	1.21565	0.29721
Glyma.17G117200.1	81.1543	96.6938	74.401	62.3568	6.34623	24.4918	14.888	26.0486	8.96704	0.901102	-1.43653	-2.33763	PF03386						AT5G25940.1		early nodulin-related
Glyma.09G151900.1	3243.13	2568.61	2841.41	2727.53	2580.8	2394.87	2779.1	2797.43	2574.44	-0.0815139	-0.167767	-0.086253	PF06232						AT5G62200.1		Embryo-specific protein 3, (ATS3)
Glyma.06G095300.1	73.0389	41.1667	73.5153	32.3331	38.0774	45.7889	73.4477	70.7034	75.3231	-0.917447	-0.691985	0.225462	PF02893						AT1G28200.1	FIP1	FH interacting protein 1
Glyma.05G122400.1	6.08657	11.4884	7.97153	17.3213	12.6925	12.7783	5.95522	10.2334	2.69011	1.18058	0.74422	-0.436365	PF00170	PTHR22952,PTHR22952:SF58				GO:0003700,GO:0043565,GO:0006355	AT5G44080.1		Basic-leucine zipper (bZIP) transcription factor family protein
Glyma.10G083300.1	1073.27	766.849	785.639	566.985	459.044	473.862	554.828	543.299	466.286	-0.0607636	-0.807874	-0.74711	PF02221	PTHR11306	KOG4680				AT3G11780.1		MD-2-related lipid recognition domain-containing protein / ML domain-containing protein
Glyma.13G027600.1	37.5339	113.926	72.6295	73.9043	106.828	170.377	60.5447	38.1426	88.7737	0.905333	0.647846	-0.257487	PF00917,PF00443	PTHR24006,PTHR24006:SF110				GO:0004221,GO:0006511,GO:0005515	AT5G06600.1	UBP12	ubiquitin-specific protease 12
Glyma.20G151800.1	9.12986	3.82946	4.42863	4.61902	2.11541	4.25944	1.98507	3.72123	1.79341	0.551792	-0.661389	-1.21318	PF08263,PF00069,PF00560	PTHR24420,PTHR24420:SF825	KOG1187			GO:0004672,GO:0005524,GO:0006468,GO:0005515	AT5G62230.1	ERL1	ERECTA-like 1
Glyma.17G100900.1	3.04329	0.957365	1.77145	1.15475	1.05771	1.06486	1.98507	0.930307	1.79341	-0.522839	-0.816581	-0.293742
Glyma.13G021800.1	3.04329	5.74419	0.885726	13.8571	9.51935	3.19458	6.94775	7.44246	8.07033	0.242459	1.45779	1.21533
Glyma.20G207400.1	193.756	100.523	108.059	41.5712	29.6158	27.6863	79.4029	104.194	59.1824	-1.296	-2.02475	-0.728759	PF08718	PTHR10219	KOG3221			GO:0017089,GO:0051861,GO:0046836,GO:0005737	AT2G33470.1	ATGLTP1,GLTP1	glycolipid transfer protein 1
Glyma.13G360000.1	13.1876	6.70155	23.0289	3.46426	8.46164	8.51887	8.93282	5.58184	7.17363	-0.0851841	-1.06985	-0.984666	PF01740,PF00916	PTHR11814,PTHR11814:SF46	KOG0236			GO:0015116,GO:0008272,GO:0016021	AT3G15990.1	SULTR3;4	sulfate transporter 3;4
Glyma.10G088400.1	6.08657	10.531	6.20008	1.15475	1.05771	1.06486	9.92536	5.58184	4.48352	-2.60874	-2.79956	-0.190821	PF03151,PF00892	PTHR11132	KOG1441			GO:0016020,GO:0055085	AT5G17630.1		Nucleotide/sugar transporter family protein
Glyma.17G083700.1	356.064	220.194	345.433	243.653	222.118	242.788	325.552	306.071	345.231	-0.463254	-0.379395	0.0838587	PF03483,PF03484	PTHR10947	KOG2472	6.1.1.20	K01890	GO:0003723,GO:0004826,GO:0000287,GO:0005524,GO:0006432	AT1G72550.1		tRNA synthetase beta subunit family protein
Glyma.16G157900.1	262.737	227.853	231.175	195.154	199.906	182.091	269.97	259.556	213.415	-0.364299	-0.322579	0.0417198	PF03398	PTHR12161:SF4,PTHR12161	KOG2027				AT1G34220.2		Regulator of Vps4 activity in the MVB pathway protein
Glyma.10G267600.1	10.1443	11.4884	3.5429	1.15475	3.17312	14.908	7.94029	15.8152	21.5209	-1.23496	-0.388223	0.846735	PF01554	PTHR11206:SF11,PTHR11206				GO:0015238,GO:0015297,GO:0006855,GO:0055085,GO:0016020	AT1G15170.1		MATE efflux family protein
Glyma.07G209500.1	112.602	177.112	161.202	68.1305	79.3279	77.7347	66.4999	101.403	56.4923	0.00511779	-1.0017	-1.00681	PF00249					GO:0003682	AT1G13300.1	HRS1	myb-like transcription factor family protein
Glyma.20G161000.1	61.8802	53.6124	54.0293	187.07	124.809	140.561	100.246	75.3549	85.1869	0.794853	1.41626	0.621405							AT4G25610.1		C2H2-like zinc finger protein
Glyma.06G151300.1	60.8657	58.3992	43.4006	12.7023	19.0387	8.51887	25.8059	41.8638	47.5253	-1.51666	-2.01449	-0.49783	PF00400	PTHR14221	KOG0283			GO:0005515	AT5G24320.1		Transducin/WD40 repeat-like superfamily protein
Glyma.16G002500.1	1916.26	2686.37	2200.14	3221.77	3481.97	3388.38	3827.22	3323.99	4041.44	-0.149323	0.569035	0.718359	PF00012	PTHR19375,PTHR19375:SF130	KOG0102		K03283	GO:0000902	AT5G49910.1	cpHsc70-2,CPHSC70-2EAT SHOCK PROTEIN 70-2,HSC70-7	chloroplast heat shock protein 70-2
Glyma.08G281500.1	5.07214	3.82946	0.885726	5.77377	5.28853	2.12972	2.97761	3.72123	2.69011	0.49063	0.430678	-0.0599516
Glyma.05G117200.1	1.01443	0.957365	0.885726	11.5475	29.6158	11.7135	3.97014	3.72123	3.58681	2.2291	4.2098	1.9807	PF01786					GO:0009916,GO:0055114	AT5G64210.1	AOX2	alternative oxidase 2
Glyma.16G160200.1	2.02886	0.957365	0.885726	6.92853	2.11541	4.25944	0.992536	0.930307	0.896704	2.23826	1.78066	-0.457596	PF01535	PTHR24015					AT1G12700.1		ATP binding;nucleic acid binding;helicases
Glyma.10G089500.1	3.04329	0.957365	2.65718	1.15475	1.05771	1.06486	2.97761	1.86061	2.69011	-1.19981	-1.02254	0.177279							AT3G21055.1	PSBTN	photosystem II subunit T
Glyma.12G028300.1	19.2741	17.2326	14.1716	4.61902	3.17312	10.6486	6.94775	17.6758	8.07033	-0.826127	-1.45847	-0.632346	PF01565	PTHR10801	KOG1262	1.3.1.72	K09828	GO:0008762,GO:0016491,GO:0050660,GO:0055114	AT3G19820.1	CBB1,DIM,DIM1,DWF1,EVE1	cell elongation protein / DWARF1 / DIMINUTO (DIM)
Glyma.16G066000.1	101.443	136.903	124.002	130.487	126.925	143.756	100.246	98.6126	94.1539	0.453244	0.146832	-0.306412	PF07542	PTHR21013	KOG3015			GO:0043461	AT5G40660.1		ATP12 protein-related
Glyma.12G090000.1	2.02886	0.957365	2.65718	3.46426	2.11541	1.06486	0.992536	2.79092	0.896704	0.50561	0.235603	-0.270006
Glyma.02G006500.1	67.9667	68.9303	70.8581	60.0473	65.5777	45.7889	92.3058	77.2155	45.7319	-0.328551	-0.277399	0.0511513	PF03109	PTHR10566,PTHR10566:SF22	KOG1234		K08869		AT4G01660.1	ABC1,ATABC1,ATATH10	ABC transporter 1
Glyma.17G205500.1	5.07214	2.87209	1.77145	3.46426	6.34623	4.25944	8.93282	11.1637	1.79341	-0.637651	0.534227	1.17188	PF00749	PTHR10119,PTHR10119:SF15				GO:0005524,GO:0016876,GO:0043039	AT1G25350.2	OVA9	glutamine-tRNA ligase, putative / glutaminyl-tRNA synthetase, putative / GlnRS, putative
Glyma.18G215200.1	18.2597	12.4457	15.9431	17.3213	17.981	19.1675	16.8731	16.7455	7.17363	0.41716	0.223625	-0.193536							AT2G38500.1		2-oxoglutarate (2OG) and Fe(II)-dependent oxygenase superfamily protein
Glyma.08G329400.1	48.6926	76.5892	54.0293	106.237	141.733	137.367	74.4402	51.1669	74.4264	0.945878	1.10366	0.157777	PF00076	PTHR24012:SF292,PTHR24012	KOG4849			GO:0003676	AT5G55670.1		RNA-binding (RRM/RBD/RNP motifs) family protein
Glyma.19G237900.1	2.02886	1.91473	0.885726	3.46426	1.05771	1.06486	0.992536	5.58184	1.79341	-0.582816	0.210212	0.793028	PF03917,PF03199	PTHR11130	KOG0021	6.3.2.3	K01920	GO:0004363,GO:0005524,GO:0006750	AT5G27380.1	GSH2,GSHB	glutathione synthetase 2
Glyma.11G194200.1	7.101	2.87209	4.42863	9.23804	8.46164	4.25944	8.93282	4.65154	8.07033	0.0201405	0.608579	0.588438	PF00903	PTHR10374	KOG2944				AT1G08110.1		lactoylglutathione lyase family protein / glyoxalase I family protein
Glyma.13G366000.1	40.5771	80.4186	54.0293	49.6545	41.2505	40.4646	38.7089	53.9578	35.8681	0.0314719	-0.41393	-0.445402	PF00069	PTHR24420,PTHR24420:SF427	KOG1187			GO:0004672,GO:0005524,GO:0006468	AT1G52540.1		Protein kinase superfamily protein
Glyma.09G077100.1	7.101	6.70155	5.31436	18.4761	7.40394	19.1675	6.94775	15.8152	10.7604	0.426277	1.2366	0.81032	PF01095,PF04043	PTHR22931:SF5,PTHR22931		3.1.1.11	K01051	GO:0030599,GO:0042545,GO:0005618,GO:0004857	AT3G43270.1		Plant invertase/pectin methylesterase inhibitor superfamily
Glyma.07G073100.1	2243.92	1780.7	1648.34	9069.44	6905.76	6440.27	2394	1948.06	1859.76	1.85373	1.98232	0.128593	PF03766,PF03763						AT3G61260.1		Remorin family protein
Glyma.04G227400.1	1129.06	1075.12	960.127	2026.59	1894.35	1633.49	1604.93	1566.64	1436.52	0.269473	0.811752	0.542279	PF00627,PF01849	PTHR21713	KOG2239			GO:0005515	AT3G49470.1	NACA2	nascent polypeptide-associated complex subunit alpha-like protein 2
Glyma.15G126100.1	4.05771	0.957365	2.65718	2.30951	4.23082	4.25944	0.992536	3.72123	0.896704	0.944807	0.493277	-0.45153	PF01701				K02697	GO:0015979,GO:0009522	ATCG00630.1		PSAJ
Glyma.01G001100.1	164.337	132.116	131.087	62.3568	75.0971	94.7725	149.873	144.198	133.609	-0.880998	-0.880532	0.000466162	PF03040					GO:0016021	AT4G31040.1		CemA-like proton extrusion protein-related
Glyma.01G204500.1	45.6493	51.6977	52.2578	148.963	157.598	134.172	12.903	27.9092	27.7978	2.68342	1.55875	-1.12467		PTHR10150					AT5G41150.1	ATRAD1,RAD1,UVH1	Restriction endonuclease, type II-like superfamily protein
Glyma.04G246700.1	4.05771	2.87209	4.42863	6.92853	4.23082	5.3243	1.98507	2.79092	3.58681	0.978976	0.537271	-0.441705
Glyma.09G140200.1	2.02886	1.91473	4.42863	1.15475	1.05771	1.06486	1.98507	3.72123	3.58681	-1.50365	-1.35309	0.150553	PF00646					GO:0005515	AT5G22720.2		F-box/RNI-like superfamily protein
Glyma.07G192700.1	26.3751	35.4225	30.1147	3.46426	15.8656	4.25944	57.5671	66.0518	40.3517	-2.79723	-1.96213	0.835107	PF00450	PTHR11802:SF8,PTHR11802	KOG1282			GO:0004185,GO:0006508	AT1G11080.2	scpl31	serine carboxypeptidase-like 31
Glyma.11G193100.1	69.9956	32.5504	50.4864	43.8807	46.539	58.5673	49.6268	66.0518	53.8022	-0.185936	-0.0386506	0.147285	PF01068,PF04679,PF04675	PTHR10459				GO:0003910,GO:0005524,GO:0006281,GO:0006310,GO:0003677	AT1G08130.1	ATLIG1,LIG1	DNA ligase 1
Glyma.U033300.1	230.275	193.388	193.088	242.499	281.35	291.771	217.365	314.444	256.457	0.049213	0.403208	0.353995	PF09743		KOG2235				AT3G46220.1
Glyma.19G138800.1	3.04329	2.87209	2.65718	5.77377	7.40394	5.3243	3.97014	0.930307	1.79341	1.46677	1.10988	-0.356888
Glyma.07G186900.1	80.1399	52.6551	67.3152	78.5233	63.4623	57.5024	73.4477	73.4943	71.7363	-0.132507	-0.00449169	0.128016	PF02679	PTHR10795,PTHR10795:SF3				GO:0019295	AT4G21320.1	HSA32	Aldolase-type TIM barrel family protein
Glyma.12G094200.1	65.9379	86.1628	69.9724	26.5594	45.4813	54.3078	85.3581	101.403	69.0462	-1.01765	-0.813626	0.204026	PF07714,PF00560,PF08263	PTHR24420,PTHR24420:SF467	KOG1187			GO:0004672,GO:0005524,GO:0006468,GO:0005515	AT3G23750.1		Leucine-rich repeat protein kinase family protein
Glyma.17G252100.1	390.555	464.322	381.748	489.616	506.641	435.527	529.022	411.196	514.708	-0.0231309	0.211406	0.234537	PF10584,PF00227	PTHR11599,PTHR11599:SF12	KOG0863	3.4.25.1	K02725	GO:0004298,GO:0051603,GO:0005839,GO:0004175,GO:0006511,GO:0019773	AT5G42790.1	ARS5,ATPSM30,PAF1	proteasome alpha subunit F1
Glyma.03G166900.1	15.2164	27.7636	14.1716	6.92853	15.8656	24.4918	21.8358	26.9789	24.211	-0.626995	-0.273385	0.35361	PF01657	PTHR11795:SF83,PTHR11795					AT5G43980.1	PDLP1,PDLP1A	plasmodesmata-located protein 1
Glyma.18G241900.1	248.535	215.407	191.317	426.105	437.89	303.485	395.029	336.771	344.334	0.117538	0.83326	0.715722		PTHR21213					AT3G02790.1		zinc finger (C2H2 type) family protein
Glyma.10G169000.1	290.127	228.81	246.232	464.211	598.661	573.959	261.037	226.065	312.95	1.03274	1.09706	0.0643146	PF05253						AT3G04160.1
Glyma.09G244200.1	83.1832	48.8256	49.6007	62.3568	66.6355	57.5024	56.5745	76.2852	76.2198	-0.164918	0.0382949	0.203213	PF01165					GO:0003735,GO:0006412,GO:0005622,GO:0005840	AT3G26360.1		Ribosomal protein S21 family protein
Glyma.19G024500.1	7.101	4.78682	11.5144	3.46426	8.46164	6.38915	2.97761	9.30307	3.58681	0.206956	-0.353617	-0.560574	PF02365					GO:0003677,GO:0006355	AT5G61430.1	ANAC100,ATNAC5,NAC100	NAC domain containing protein 100
Glyma.01G014700.1	110.573	71.8024	93.0012	137.416	60.2892	102.226	9.92536	36.282	8.07033	2.4662	0.123229	-2.34297	PF02375,PF02373,PF02928	PTHR10694,PTHR10694:SF8	KOG1246			GO:0005515,GO:0005634	AT5G46910.1		Transcription factor jumonji (jmj) family protein / zinc finger (C5HC2 type) family protein
Glyma.01G180400.1	51.7359	67.9729	56.6865	64.6663	41.2505	39.3998	27.791	27.9092	27.7978	0.799385	-0.279612	-1.079	PF00188	PTHR10334:SF7,PTHR10334					AT5G66590.1		CAP (Cysteine-rich secretory proteins, Antigen 5, and Pathogenesis-related 1 protein) superfamily protein
Glyma.09G273500.1	1.01443	0.957365	1.77145	1.15475	1.05771	2.12972	0.992536	1.86061	1.79341	-0.0977433	0.214129	0.311873	PF00150					GO:0004553,GO:0005975	AT5G01930.1		Glycosyl hydrolase superfamily protein
Glyma.09G212500.1	584.311	651.008	661.637	474.604	521.449	456.825	617.357	509.808	607.965	-0.256131	-0.384773	-0.128642	PF08879,PF08880					GO:0005515,GO:0005524,GO:0016818,GO:0006355,GO:0005634	AT4G37740.1	AtGRF2,GRF2	growth-regulating factor 2
Glyma.03G257300.1	230.275	196.26	186.002	450.354	490.775	501.549	238.209	197.225	190.101	1.20559	1.23588	0.0302922		PTHR12786,PTHR12786:SF1	KOG2827				AT4G01000.1		Ubiquitin-like superfamily protein
Glyma.07G182500.1	1.01443	0.957365	0.885726	6.92853	1.05771	2.12972	0.992536	0.930307	2.69011	1.13287	1.8238	0.690928
Glyma.18G211900.1	145.063	86.1628	105.401	108.547	90.9627	117.135	174.686	148.849	121.055	-0.489615	-0.0882908	0.401324	PF03489,PF05184	PTHR11480:SF2,PTHR11480	KOG1340			GO:0006629	AT3G51730.1		saposin B domain-containing protein
Glyma.03G173300.1	1.01443	0.957365	0.885726	1.15475	2.11541	1.06486	9.92536	6.51215	1.79341	-2.07227	0.601277	2.67355		PTHR26374:SF459,PTHR26374					AT2G37430.1		C2H2 and C2HC zinc fingers superfamily protein
Glyma.12G187400.1	50.7214	64.1434	71.7438	36.9522	42.3082	25.5566	19.8507	33.4911	36.7649	0.218167	-0.832143	-1.05031	PF04857	PTHR10797	KOG0304			GO:0005634	AT5G22250.1		Polynucleotidyl transferase, ribonuclease H-like superfamily protein
Glyma.03G105600.1	1.01443	2.87209	2.65718	3.46426	8.46164	8.51887	0.992536	3.72123	0.896704	1.86554	1.64355	-0.221985	PF00069	PTHR24362				GO:0004672,GO:0005524,GO:0006468	AT1G04210.1		Leucine-rich repeat protein kinase family protein
Glyma.08G044400.1	2.02886	0.957365	2.65718	4.61902	2.11541	2.12972	0.992536	0.930307	0.896704	1.65252	0.651417	-1.0011	PF07887						AT1G73805.1		Calmodulin binding protein-like
Glyma.08G247400.1	148.107	158.923	128.43	248.272	224.234	200.194	117.119	120.94	142.576	0.821553	0.627424	-0.19413	PF10406,PF07524	PTHR23307	KOG2389				AT3G02160.1		Bromodomain transcription factor
Glyma.20G163500.1	3.04329	2.87209	3.5429	3.46426	3.17312	2.12972	0.992536	0.930307	2.69011	0.926409	-0.109479	-1.03589	PF01061,PF00005	PTHR19241:SF103,PTHR19241	KOG0061			GO:0005524,GO:0016887,GO:0016020	AT5G52860.1		ABC-2 type transporter family protein
Glyma.20G229400.1	28.404	22.0194	19.486	18.4761	13.7502	19.1675	1.98507	6.51215	12.5539	1.2877	-0.443894	-1.73159	PF10440					GO:0018024	AT2G40020.3		Nucleolar histone methyltransferase-related protein
Glyma.11G072500.1	12.1731	4.78682	3.5429	3.46426	7.40394	5.3243	9.92536	14.8849	15.244	-1.30663	-0.3405	0.966129	PF05142						AT1G75520.1	SRS5	SHI-related sequence 5
Glyma.13G073200.1	2623.31	2778.27	2963.64	3967.74	3536.97	3326.62	4001.9	3632.85	3766.16	-0.0739393	0.372734	0.446673	PF00736	PTHR11595:SF5,PTHR11595	KOG1668		K03232	GO:0003746,GO:0006414,GO:0005853	AT5G12110.1		Glutathione S-transferase, C-terminal-like;Translation elongation factor EF1B/ribosomal protein S6
Glyma.04G198200.1	3.04329	3.82946	5.31436	1.15475	1.05771	2.12972	1.98507	0.930307	0.896704	0.18784	-1.48886	-1.6767							AT4G24972.1	TPD1	tapetum determinant 1
Glyma.05G238900.1	651.263	463.365	464.12	519.64	479.141	561.181	405.947	296.768	424.141	0.469207	-0.0172711	-0.486478	PF00097	PTHR11203,PTHR11203:SF27				GO:0046872,GO:0008270,GO:0005515	AT1G68070.1		Zinc finger, C3HC4 type (RING finger) family protein
Glyma.04G117600.1	6.08657	8.61628	5.31436	1.15475	1.05771	9.58373	0.992536	2.79092	0.896704	1.33369	-0.76292	-2.09661	PF04937,PF02892,PF05699	PTHR10775:SF75,PTHR10775				GO:0003677,GO:0046983	AT4G15020.1		hAT transposon superfamily
Glyma.14G119800.1	390.555	423.155	358.719	489.616	466.448	511.132	343.417	350.726	361.372	0.475115	0.323561	-0.151554		PTHR10378,PTHR10378:SF6					AT1G43850.1	SEU	SEUSS transcriptional co-regulator
Glyma.15G271800.1	417.945	760.148	638.608	533.497	730.875	763.504	628.275	551.672	634.866	0.160147	0.158648	-0.00149931	PF05303	PTHR12601	KOG1839				AT3G52140.2		tetratricopeptide repeat (TPR)-containing protein
Glyma.19G160700.1	117.674	117.756	155.888	203.237	231.638	185.285	187.589	145.128	209.829	0.192895	0.664301	0.471406	PF00439,PF00583	PTHR22880:SF6,PTHR22880		2.3.1.48	K06062	GO:0005515,GO:0008080	AT3G54610.1	BGT,GCN5,HAC3,HAG01,HAG1,HAT1	histone acetyltransferase of the GNAT family 1
Glyma.20G112100.1	8.11543	3.82946	12.4002	1.15475	1.05771	4.25944	3.97014	7.44246	5.38022	-1.37558	-1.91137	-0.535784	PF01535	PTHR24015,PTHR24015:SF83					AT5G04780.1		Pentatricopeptide repeat (PPR) superfamily protein
Glyma.08G100300.1	23.3319	37.3372	30.1147	12.7023	12.6925	20.2323	16.8731	14.8849	12.5539	0.0421972	-0.992544	-1.03474	PF01762,PF00337	PTHR11214,PTHR11214:SF11	KOG2287			GO:0030246,GO:0008378,GO:0006486,GO:0016020	AT4G21060.2		Galactosyltransferase family protein
Glyma.04G229100.1	7.101	12.4457	7.08581	8.08328	7.40394	12.7783	9.92536	4.65154	1.79341	0.787963	0.0858532	-0.70211
Glyma.16G052200.1	6.08657	5.74419	1.77145	8.08328	8.46164	11.7135	5.95522	11.1637	5.38022	0.32881	1.05484	0.726028	PF00069	PTHR24420,PTHR24420:SF700	KOG1187			GO:0004672,GO:0005524,GO:0006468	AT5G13160.1	PBS1	Protein kinase superfamily protein
Glyma.16G207800.1	37.5339	50.7403	41.6291	64.6663	41.2505	27.6863	33.7462	28.8395	34.0747	0.466956	0.0405155	-0.42644	PF02900					GO:0008198,GO:0016491,GO:0006725	AT4G15093.1		catalytic LigB subunit of aromatic ring-opening dioxygenase family
Glyma.05G196800.1	130.861	167.539	116.03	152.428	142.79	129.913	148.88	150.71	126.435	-0.00303298	0.0367772	0.0398101	PF01823	PTHR19324,PTHR19324:SF4					AT4G24290.2		MAC/Perforin domain-containing protein
Glyma.19G240500.1	7.101	0.957365	0.885726	1.15475	1.05771	3.19458	0.992536	1.86061	0.896704	0.528004	-0.726097	-1.2541	PF00999	PTHR10110:SF20,PTHR10110	KOG1965			GO:0015299,GO:0006812,GO:0055085,GO:0016021	AT3G05030.1	ATNHX2,NHX2	sodium hydrogen exchanger 2
Glyma.06G306600.1	1.01443	0.957365	0.885726	4.61902	3.17312	1.06486	5.95522	3.72123	1.79341	-0.372958	1.63205	2.00501
Glyma.18G014900.1	1537.87	1525.08	1283.42	2506.97	2524.74	2788.87	1926.51	1693.16	1866.04	0.511597	0.847464	0.335867	PF00046,PF02183	PTHR24326,PTHR24326:SF218	KOG0483		K09338	GO:0003700,GO:0043565,GO:0006355,GO:0003677,GO:0005634	AT2G22430.1	ATHB6,HB6	homeobox protein 6
Glyma.07G005000.1	11.1587	2.87209	6.20008	3.46426	2.11541	10.6486	14.888	18.6061	26.0044	-1.87435	-0.318051	1.5563	PF06733	PTHR11472:SF5,PTHR11472	KOG1133	3.6.4.13	K11273	GO:0003677,GO:0004003,GO:0005524,GO:0003676,GO:0008026,GO:0016818,GO:0006139	AT1G79890.1		RAD3-like DNA-binding helicase protein
Glyma.10G210100.1	42.606	33.5078	37.2005	23.0951	34.9043	41.5295	67.4924	54.8881	58.2857	-0.86014	-0.187142	0.672998						GO:0031966	AT4G14145.1
Glyma.13G370900.1	63.909	100.523	108.059	78.5233	74.0394	66.0213	99.2536	95.8217	140.782	-0.619663	-0.31802	0.301642	PF01544	PTHR13890	KOG2662			GO:0046873,GO:0030001,GO:0055085,GO:0016020	AT1G16010.1	MGT2,MRS2-1	magnesium transporter 2
Glyma.01G121500.1	4.05771	1.91473	1.77145	3.46426	1.05771	1.06486	0.992536	0.930307	1.79341	0.588182	-0.47103	-1.05921
Glyma.02G149800.1	526.489	536.124	501.321	369.522	396.64	383.349	335.477	339.562	356.888	0.155678	-0.44416	-0.599838	PF12483	PTHR12183	KOG1571			GO:0004842,GO:0007005	AT1G63900.1		E3 Ubiquitin ligase family protein
Glyma.05G109300.1	166.366	141.69	115.144	224.022	316.254	244.918	234.238	226.995	199.965	0.247966	0.891707	0.643741							AT5G65770.1	LINC4	little nuclei4
Glyma.15G086100.1	1.01443	0.957365	0.885726	1.15475	1.05771	1.06486	0.992536	0.930307	0.896704	0.217053	0.197753	-0.0193	PF02469	PTHR10900:SF23,PTHR10900					AT5G03170.1	ATFLA11,FLA11	FASCICLIN-like arabinogalactan-protein 11
Glyma.12G007900.1	190.713	148.392	148.802	277.141	289.811	304.55	166.746	177.689	198.172	0.683599	0.836901	0.153302		PTHR10615,PTHR10615:SF5	KOG4443				AT3G08020.1		PHD finger family protein
Glyma.18G010500.1	8.11543	10.531	11.5144	19.6308	29.6158	20.2323	14.888	17.6758	13.4506	0.594489	1.2039	0.609408	PF00011	PTHR11527,PTHR11527:SF18					AT4G27670.1	HSP21	heat shock protein 21
Glyma.07G185500.1	66.9523	72.7597	73.5153	24.2499	12.6925	61.7618	34.7388	106.985	58.2857	-1.01889	-1.11121	-0.092321	PF08491	PTHR10835	KOG1298	1.14.99.7	K00511	GO:0050660,GO:0008033,GO:0004506,GO:0055114,GO:0016021	AT1G58440.1	SQE1,XF1	FAD/NAD(P)-binding oxidoreductase family protein
Glyma.19G022400.1	1.01443	0.957365	3.5429	1.15475	3.17312	1.06486	1.98507	13.0243	6.27693	-1.98084	-0.0322658	1.94857							AT4G29750.1		CRS1 / YhbY (CRM) domain-containing protein
Glyma.08G071900.1	225.203	222.109	256.861	288.689	237.984	244.918	260.044	233.507	248.387	0.056535	0.131906	0.075371	PF00481	PTHR13832,PTHR13832:SF149	KOG0698			GO:0003824	AT1G34750.1		Protein phosphatase 2C family protein
Glyma.16G075400.1	1138.19	1038.74	1181.56	1696.33	1745.21	1679.28	1255.56	1042.87	1347.75	0.489993	0.608566	0.118573	PF05739,PF00804	PTHR19957:SF11,PTHR19957	KOG0811			GO:0016020,GO:0005515	AT5G46860.1	ATSYP22,ATVAM3,SGR3,SYP22,VAM3	Syntaxin/t-SNARE family protein
Glyma.U003000.1	155.208	109.14	133.745	354.51	304.619	312.004	96.276	91.1701	143.473	1.55319	1.28657	-0.266624		PTHR12126,PTHR12126:SF2	KOG4288				AT5G10730.1		NAD(P)-binding Rossmann-fold superfamily protein
Glyma.20G113300.1	129.847	169.454	209.031	228.641	144.906	190.61	257.067	229.786	259.147	-0.403079	0.150326	0.553405	PF00004	PTHR20953				GO:0005524,GO:0006810	AT3G10420.2		P-loop containing nucleoside triphosphate hydrolases superfamily protein
Glyma.17G215500.1	14.202	14.3605	18.6002	21.9403	32.7889	28.7512	17.8656	19.5365	19.7275	0.5472	0.823791	0.276591	PF03791,PF00046,PF03790,PF03789	PTHR11850:SF15,PTHR11850	KOG0773			GO:0003700,GO:0043565,GO:0006355,GO:0003677,GO:0005634	AT5G25220.1	KNAT3	KNOTTED1-like homeobox gene 3
Glyma.10G156500.1	3.04329	0.957365	0.885726	11.5475	12.6925	7.45401	3.97014	6.51215	3.58681	1.17168	2.69737	1.52569	PF00097	PTHR22764,PTHR22764:SF21				GO:0046872,GO:0008270,GO:0004842,GO:0005680,GO:0005515	AT3G05200.1	ATL6	RING/U-box superfamily protein
Glyma.08G319100.1	52.7503	51.6977	50.4864	30.0236	21.1541	29.8161	22.8283	28.8395	14.3473	0.295015	-0.935774	-1.23079		PTHR21422:SF1,PTHR21422	KOG2390			GO:0005097	AT5G55060.1
Glyma.02G290100.1	133.905	159.88	170.059	84.2971	99.4243	92.6427	149.873	149.779	145.266	-0.68697	-0.747069	-0.0600986	PF00149	PTHR22953	KOG1378			GO:0016787	AT3G20500.1	ATPAP18,PAP18	purple acid phosphatase 18
Glyma.05G161600.1	14473.9	13812.9	14161	6318.82	5173.24	4931.36	22362.8	25279.2	23334	-2.11158	-1.36993	0.741646	PF02798,PF00043	PTHR11260:SF16,PTHR11260	KOG0406			GO:0005515	AT2G29420.1	ATGSTU7,GST25,GSTU7	glutathione S-transferase tau 7
Glyma.09G031100.1	190.713	260.403	217.889	271.367	337.408	336.495	212.403	223.274	216.106	0.536338	0.498712	-0.0376261	PF00271,PF00397,PF00270	PTHR24031:SF50,PTHR24031	KOG0331	3.6.4.13	K12823	GO:0003676,GO:0005524,GO:0008026,GO:0004386,GO:0005515	AT3G06480.1		DEAD box RNA helicase family protein
Glyma.07G214200.1	3.04329	2.87209	5.31436	2.30951	1.05771	2.12972	1.98507	0.930307	4.48352	-0.428683	-1.03063	-0.601942
Glyma.19G091200.1	456.493	287.209	334.804	480.378	325.773	319.458	179.649	178.619	162.303	1.11254	0.0616706	-1.05087	PF01300	PTHR17490	KOG3051		K07566	GO:0003725	AT3G01920.1		DHBP synthase RibB-like alpha/beta domain
Glyma.07G041400.1	113.616	86.1628	81.4868	121.249	103.655	66.0213	76.4253	59.5397	52.0088	0.630119	0.0487173	-0.581402	PF09425,PF06200						AT1G72450.1	JAZ6,TIFY11B	jasmonate-zim-domain protein 6
Glyma.09G208900.1	1.01443	0.957365	3.5429	1.15475	1.05771	1.06486	0.992536	0.930307	1.79341	-0.181331	-0.750765	-0.569434	PF00560	PTHR23155,PTHR23155:SF121	KOG0472			GO:0005515	AT3G14460.1		LRR and NB-ARC domains-containing disease resistance protein
Glyma.01G149000.1	5784.27	5693.45	6211.6	7028.99	6164.31	6372.12	6039.58	5167.86	5998.95	0.185362	0.145428	-0.0399343	PF00069	PTHR24055:SF115,PTHR24055	KOG0661	2.7.11.22	K08829	GO:0004672,GO:0005524,GO:0006468	AT4G19110.1		Protein kinase superfamily protein
Glyma.06G313500.1	1.01443	1.91473	1.77145	1.15475	1.05771	1.06486	0.992536	0.930307	0.896704	0.217053	-0.520332	-0.737385	PF07690	PTHR24003:SF14,PTHR24003	KOG2615			GO:0022857,GO:0055085,GO:0016021	AT5G13750.1	ZIFL1	zinc induced facilitator-like 1
Glyma.18G269900.1	1.01443	2.87209	1.77145	1.15475	1.05771	2.12972	1.98507	5.58184	0.896704	-0.962856	-0.381867	0.580989	PF11721,PF07714	PTHR24420,PTHR24420:SF418	KOG1187			GO:0004672,GO:0005524,GO:0006468	AT3G51550.1	FER	Malectin/receptor-like protein kinase family protein
Glyma.08G113200.1	591.412	464.322	485.378	519.64	489.718	483.446	461.529	492.133	500.361	0.0379746	-0.0459473	-0.0839219	PF00149	PTHR11668,PTHR11668:SF21	KOG0371	3.1.3.16	K04382	GO:0016787	AT2G42500.1	PP2A-3	protein phosphatase 2A-3
Glyma.01G069500.1	84.1976	99.5659	77.0582	93.5351	121.636	115.005	81.3879	91.1701	95.0506	0.303111	0.340172	0.037061	PF00118	PTHR11353,PTHR11353:SF8	KOG0356			GO:0005524,GO:0044267	AT1G26230.1		TCP-1/cpn60 chaperonin family protein
Glyma.16G046200.1	65.9379	100.523	63.7723	24.2499	24.3272	30.8809	116.127	127.452	119.262	-2.19107	-1.53483	0.656238	PF02705					GO:0015079,GO:0071805,GO:0016020	AT3G02050.1	ATKT4,ATKUP3,KUP3	K+ uptake transporter 3
Glyma.04G196500.1	2.02886	0.957365	0.885726	5.77377	10.5771	10.6486	15.8806	19.5365	19.7275	-1.03029	2.8018	3.83209							AT4G24930.1		thylakoid lumenal 17.9 kDa protein, chloroplast
Glyma.14G072200.1	179.554	138.818	134.63	58.8925	52.8853	53.243	52.6044	74.4246	71.7363	-0.268419	-1.45687	-1.18845	PF06090	PTHR14456,PTHR14456:SF6	KOG4749			GO:0005524,GO:0035299	AT5G42810.1	ATIPK1,IPK1	inositol-pentakisphosphate 2-kinase 1
Glyma.02G129800.1	118.688	92.8644	87.6869	107.392	142.79	135.237	169.724	226.995	189.204	-0.604282	0.36513	0.969411	PF00383	PTHR11079,PTHR11079:SF12	KOG1018			GO:0008270,GO:0016787	AT1G68720.1	ATTADA,TADA	tRNA arginine adenosine deaminase
Glyma.10G251000.1	1.01443	2.87209	2.65718	4.61902	3.17312	10.6486	3.97014	15.8152	9.86374	-0.685093	1.49472	2.17981							AT3G06035.1		Glycoprotein membrane precursor GPI-anchored
Glyma.04G216900.1	4.05771	4.78682	3.5429	3.46426	1.05771	2.12972	3.97014	2.79092	3.58681	-0.637543	-0.897086	-0.259543	PF08787
Glyma.17G046500.1	33.4761	30.6357	23.9146	3.46426	15.8656	4.25944	5.95522	9.30307	8.96704	-0.0383844	-1.8998	-1.86142	PF00578	PTHR10681:SF5,PTHR10681	KOG0855	1.11.1.15	K03564	GO:0016209,GO:0016491,GO:0055114	AT3G26060.1	ATPRX Q	Thioredoxin superfamily protein
Glyma.09G127700.1	1.01443	4.78682	7.08581	23.0951	45.4813	25.5566	10.9179	11.1637	8.96704	1.60017	2.86878	1.26861	PF00201	PTHR11926,PTHR11926:SF15	KOG1192			GO:0016758,GO:0008152	AT3G16520.3	UGT88A1	UDP-glucosyl transferase 88A1
Glyma.06G230000.1	5.07214	5.74419	8.85726	6.92853	8.46164	2.12972	7.94029	8.37277	0.896704	0.0257671	-0.167267	-0.193034							AT1G43770.2		RING/FYVE/PHD zinc finger superfamily protein
Glyma.12G218400.1	2.02886	0.957365	1.77145	2.30951	4.23082	3.19458	3.97014	10.2334	3.58681	-0.869855	1.03291	1.90277	PF12609						AT4G10265.1		Wound-responsive family protein
Glyma.15G143100.1	30.4329	38.2946	23.0289	41.5712	41.2505	44.7241	7.94029	11.1637	12.5539	2.01038	0.475136	-1.53525	PF07992,PF00070,PF02852	PTHR22912:SF49,PTHR22912	KOG1335	1.8.1.4	K00382	GO:0016491,GO:0050660,GO:0055114,GO:0008033,GO:0045454	AT3G16950.2	LPD1,ptlpd1	lipoamide dehydrogenase 1
Glyma.13G296200.1	6.08657	3.82946	7.08581	5.77377	11.6348	4.25944	5.95522	4.65154	4.48352	0.521945	0.349873	-0.172072	PF00069,PF00139	PTHR24420,PTHR24420:SF638	KOG1187			GO:0004672,GO:0005524,GO:0006468,GO:0030246	AT4G28350.1		Concanavalin A-like lectin protein kinase family protein
Glyma.05G225100.1	1.01443	0.957365	1.77145	4.61902	3.17312	4.25944	5.95522	1.86061	6.27693	-0.225732	1.68686	1.91259	PF02365					GO:0003677,GO:0006355	AT4G29230.1	anac075,NAC075	NAC domain containing protein 75
Glyma.03G069700.1	246.506	237.426	280.775	284.07	272.888	232.139	172.701	141.407	234.04	0.525638	0.0452941	-0.480344	PF01529	PTHR22883	KOG1315			GO:0008270	AT3G09320.1		DHHC-type zinc finger family protein
Glyma.09G176900.1	285.054	183.814	286.09	252.891	316.254	234.269	198.507	221.413	151.543	0.491483	0.0897477	-0.401736	PF00168	PTHR26357,PTHR26357:SF5	KOG1030			GO:0005515	AT3G17980.1		Calcium-dependent lipid-binding (CaLB domain) family protein
Glyma.12G184100.1	2.02886	6.70155	6.20008	2.30951	5.28853	2.12972	8.93282	3.72123	9.86374	-1.21089	-0.618083	0.592804
Glyma.03G160700.1	5.07214	0.957365	2.65718	1.15475	1.05771	1.06486	0.992536	1.86061	0.896704	-0.194318	-1.40629	-1.21197							AT2G42410.1	ATZFP11,ZFP11	zinc finger protein 11
Glyma.16G173200.1	21.303	35.4225	27.4575	76.2138	84.6164	66.0213	22.8283	10.2334	20.6242	2.07913	1.43015	-0.648986
Glyma.03G166500.1	3.04329	0.957365	0.885726	1.15475	1.05771	1.06486	0.992536	0.930307	0.896704	0.217053	-0.576249	-0.793302	PF03767	PTHR11726:SF1,PTHR11726				GO:0003993	AT1G04040.1		HAD superfamily, subfamily IIIB acid phosphatase
Glyma.13G163800.1	8.11543	2.87209	4.42863	3.46426	1.05771	2.12972	1.98507	1.86061	4.48352	-0.324458	-1.21265	-0.888192
Glyma.05G180300.1	84.1976	85.2055	100.087	245.963	260.196	228.945	74.4402	78.1458	74.4264	1.69518	1.44771	-0.247461	PF04873					GO:0005634	AT5G65100.1		Ethylene insensitive 3 family protein
Glyma.11G157600.1	5.07214	2.87209	2.65718	1.15475	2.11541	2.12972	0.992536	4.65154	3.58681	-0.773541	-0.973257	-0.199716
Glyma.18G285900.1	15.2164	21.062	15.0573	24.2499	38.0774	41.5295	8.93282	18.6061	9.86374	1.47338	1.01656	-0.456822	PF00628	PTHR10615:SF20,PTHR10615	KOG1085			GO:0005515	AT5G24330.1	ATXR6,SDG34	ARABIDOPSIS TRITHORAX-RELATED PROTEIN 6
Glyma.03G022900.1	191.727	370.5	293.175	81.9876	167.117	172.507	100.246	131.173	100.431	0.345384	-1.02069	-1.36607	PF09324,PF01369	PTHR10663,PTHR10663:SF42	KOG0929			GO:0005086,GO:0032012	AT3G60860.1		SEC7-like guanine nucleotide exchange family protein
Glyma.07G182900.1	521.416	487.299	476.521	724.031	831.357	775.217	441.678	331.189	446.558	0.934502	0.650013	-0.284489	PF01031,PF00350,PF02212	PTHR11566:SF12,PTHR11566	KOG0446	3.6.5.5	K01528	GO:0003924,GO:0005525	AT4G33650.1	ADL2,DRP3A	dynamin-related protein 3A
Glyma.11G002600.1	531.561	1018.64	771.467	554.282	692.797	864.666	660.036	705.173	782.822	-0.0245796	-0.136724	-0.112144	PF11865,PF02260,PF02259,PF08771,PF00454	PTHR11139,PTHR11139:SF9	KOG0891		K07203	GO:0016773,GO:0005515,GO:0008144	AT1G50030.1	TOR	target of rapamycin
Glyma.19G166700.1	63.909	54.5698	43.4006	60.0473	52.8853	64.9564	57.5671	59.5397	54.6989	0.0501991	0.136058	0.0858585	PF02115	PTHR10980:SF2,PTHR10980	KOG3205			GO:0005094,GO:0005737	AT3G07880.1	SCN1	Immunoglobulin E-set superfamily protein
Glyma.20G155300.1	4.05771	6.70155	1.77145	94.6899	110.001	78.7996	10.9179	9.30307	17.0374	2.92767	4.49976	1.57209	PF01963	PTHR21530					AT5G52030.2		TraB family protein
Glyma.U014800.1	3.04329	1.91473	1.77145	3.46426	3.17312	1.06486	9.92536	5.58184	8.07033	-1.61406	0.194786	1.80885	PF07714	PTHR24420,PTHR24420:SF794				GO:0004672,GO:0005524,GO:0006468	AT5G18910.1		Protein kinase superfamily protein
Glyma.18G156000.1	1.01443	1.91473	0.885726	100.464	79.3279	80.9293	21.8358	19.5365	21.5209	2.05153	6.09472	4.04319	PF00295,PF00249,PF07765	PTHR12374				GO:0003682,GO:0004650,GO:0005975	AT1G03080.1		kinase interacting (KIP1-like) family protein
Glyma.11G240400.1	4.05771	22.9768	6.20008	8.08328	8.46164	7.45401	10.9179	22.3274	17.0374	-1.06709	-0.469713	0.597377							AT4G39900.1
Glyma.01G106800.1	62.8946	36.3799	46.0578	264.439	175.579	188.48	57.5671	52.0972	51.1121	1.96685	2.11255	0.145701	PF00011	PTHR11527,PTHR11527:SF14	KOG3591				AT1G53540.1		HSP20-like chaperones superfamily protein
Glyma.19G016500.1	3.04329	0.957365	1.77145	3.46426	2.11541	4.25944	2.97761	1.86061	0.896704	0.778753	0.769431	-0.00932215	PF00443	PTHR24006,PTHR24006:SF197				GO:0004221,GO:0006511	AT5G22030.1	UBP8	ubiquitin-specific protease 8
Glyma.06G270300.1	248.535	284.337	318.861	290.998	305.677	286.447	277.91	231.647	295.912	0.132784	0.0522106	-0.0805738	PF01012,PF00766	PTHR10909,PTHR10909:SF153	KOG3954		K03522		AT1G50940.1	ETFALPHA	electron transfer flavoprotein alpha
Glyma.07G240800.1	10.1443	7.65892	4.42863	3.46426	6.34623	10.6486	26.7985	10.2334	14.3473	-1.32844	-0.119885	1.20855
Glyma.18G008900.1	20.2886	22.9768	24.8003	5.77377	8.46164	9.58373	12.903	10.2334	4.48352	-0.213584	-1.51481	-1.30122	PF02681				K09775		AT1G67600.1		Acid phosphatase/vanadium-dependent haloperoxidase-related protein
Glyma.07G204700.1	43.6204	45.9535	23.9146	117.785	66.6355	84.1239	95.2834	80.9367	52.0088	0.234678	1.24261	1.00794		PTHR13191			K14545		AT5G38720.1
Glyma.03G158600.1	126.804	104.353	115.144	50.8092	79.3279	87.3184	260.044	263.277	212.519	-1.75867	-0.671305	1.08737	PF02309					GO:0006355,GO:0005634	AT5G43700.1	ATAUX2-11,IAA4	AUX/IAA transcriptional regulator family protein
Glyma.13G007200.1	552.864	585.907	595.208	1048.52	948.762	1094.68	913.133	653.076	830.348	0.367556	0.834433	0.466877	PF03109	PTHR10566,PTHR10566:SF10	KOG1235				AT3G07700.1		Protein kinase superfamily protein
Glyma.07G068700.1	66.9523	70.845	70.8581	35.7974	35.962	52.1781	40.694	31.6304	36.7649	0.184103	-0.751509	-0.935613	PF12036	PTHR14319,PTHR14319:SF3					AT2G46060.1		transmembrane protein-related
Glyma.03G156000.1	61.8802	51.6977	50.4864	64.6663	64.52	52.1781	84.3656	46.5154	38.5583	0.0981239	0.144631	0.0465067	PF00646,PF01344	PTHR24414:SF184,PTHR24414				GO:0005515	AT3G63220.2		Galactose oxidase/kelch repeat superfamily protein
Glyma.20G132300.1	114.63	54.5698	46.9435	91.2256	65.5777	84.1239	51.6119	114.428	60.9759	0.0858066	0.156607	0.0708	PF04419						AT2G23090.1		Uncharacterised protein family SERF
Glyma.07G011900.1	20.2886	35.4225	44.2863	175.523	110.001	48.9835	27.791	17.6758	15.244	2.46201	1.74208	-0.719937	PF06888	PTHR20889	KOG3120			GO:0016791	AT1G17710.1		Pyridoxal phosphate phosphatase-related protein
Glyma.09G109000.1	95.3563	101.481	99.2013	137.416	157.598	189.545	185.604	201.877	149.75	-0.148869	0.710888	0.859757							AT3G58050.1
Glyma.03G002100.1	108.544	86.1628	89.4583	46.1902	61.3469	77.7347	50.6193	69.7731	60.9759	0.0307218	-0.617085	-0.647807	PF00150					GO:0004553,GO:0005975	AT5G01930.1		Glycosyl hydrolase superfamily protein
Glyma.19G210200.1	41.5916	42.124	62.8865	140.88	150.194	188.48	40.694	49.3063	37.6616	1.90937	1.70979	-0.199579	PF05637		KOG4748	2.4.2.39	K08238	GO:0016758,GO:0016021	AT3G62720.1	ATXT1,XT1,XXT1	xylosyltransferase 1
Glyma.19G260100.1	199.842	350.395	298.49	255.201	314.139	325.847	332.5	225.134	356.888	-0.0308299	0.0768863	0.107716	PF08318	PTHR24016:SF19,PTHR24016	KOG0412				AT4G01400.2
Glyma.06G108200.1	145.063	152.221	170.059	162.82	134.329	123.524	154.836	132.104	82.4967	0.187374	-0.151786	-0.33916	PF02204	PTHR23101	KOG2319				AT3G19770.1	ATVPS9A,VPS9,VPS9A	Vacuolar sorting protein 9 (VPS9) domain
Glyma.10G164500.1	29.4184	27.7636	32.7719	26.5594	23.2695	28.7512	20.8433	19.5365	16.1407	0.475393	-0.195022	-0.670414	PF01501	PTHR11183,PTHR11183:SF7				GO:0016757	AT5G18480.1	PGSIP6	plant glycogenin-like starch initiation protein 6
Glyma.04G154500.1	90.2842	82.3334	75.2867	242.499	167.117	178.896	162.776	211.18	146.163	0.178233	1.24729	1.06906	PF01429					GO:0003677,GO:0005634	AT1G15340.1	MBD10	methyl-CPG-binding domain 10
Glyma.05G010200.1	1.01443	1.91473	3.5429	1.15475	4.23082	1.06486	0.992536	0.930307	1.79341	0.795549	-0.00482876	-0.800378	PF00067	PTHR24282:SF174,PTHR24282	KOG0157			GO:0005506,GO:0009055,GO:0016705,GO:0020037,GO:0055114	AT2G26710.1	BAS1,CYP72B1,CYP734A1	Cytochrome P450 superfamily protein
Glyma.01G225700.1	190.713	179.985	180.688	103.928	95.1935	141.626	288.828	209.319	313.846	-1.25276	-0.694357	0.558407	PF02207	PTHR13513:SF4,PTHR13513	KOG2752		K11979	GO:0004842,GO:0008270	AT4G23860.1		PHD finger protein-related
Glyma.05G074200.1	4.05771	3.82946	4.42863	9.23804	3.17312	3.19458	4.96268	0.930307	2.69011	0.862506	0.341565	-0.52094							AT3G27250.1
Glyma.09G254300.1	89.2697	68.9303	88.5726	101.618	100.482	62.8267	81.3879	52.0972	97.7407	0.196293	0.102413	-0.0938794							AT1G01470.1	LEA14,LSR3	Late embryogenesis abundant protein
Glyma.18G038900.1	1.01443	1.91473	0.885726	1.15475	1.05771	3.19458	3.97014	2.79092	0.896704	-0.502086	0.503199	1.00528
Glyma.09G116700.1	56.808	76.5892	64.658	112.011	132.213	100.097	136.97	168.386	151.543	-0.408119	0.797852	1.20597							AT3G18800.1
Glyma.13G132400.1	608.657	550.485	510.178	881.078	925.492	753.92	407.932	556.324	423.244	0.883932	0.61716	-0.266773	PF00719	PTHR10286	KOG1626	3.6.1.1	K01507	GO:0000287,GO:0004427,GO:0006796,GO:0005737	AT3G53620.1	AtPPa4,PPa4	pyrophosphorylase 4
Glyma.16G172400.1	1.01443	2.87209	8.85726	31.1784	33.8466	37.2701	33.7462	36.282	21.5209	0.160118	3.00487	2.84475	PF00664,PF00005	PTHR24223,PTHR24223:SF21	KOG0054			GO:0005524,GO:0016887,GO:0042626,GO:0006810,GO:0055085,GO:0016021	AT3G59140.1	ATMRP14,MRP14	multidrug resistance-associated protein 14
Glyma.04G107100.1	29.4184	58.3992	45.172	31.1784	42.3082	35.1404	21.8358	50.2366	38.5583	-0.0263689	-0.291932	-0.265564							AT1G22060.1
Glyma.13G209400.1	580.253	479.64	476.521	263.284	319.427	301.355	382.126	395.381	362.268	-0.366523	-0.79734	-0.430817	PF03348	PTHR10383,PTHR10383:SF2				GO:0016020	AT3G06170.1		Serinc-domain containing serine and sphingolipid biosynthesis protein
Glyma.08G337100.1	2.02886	0.957365	1.77145	3.46426	10.5771	6.38915	0.992536	3.72123	0.896704	1.86453	2.10239	0.237865	PF00226	PTHR24078					AT3G13310.1		Chaperone DnaJ-domain superfamily protein
Glyma.18G190900.1	1.01443	0.957365	4.42863	2.30951	3.17312	4.25944	3.97014	6.51215	7.17363	-0.857853	0.60606	1.46391	PF00931	PTHR11017,PTHR11017:SF126	KOG4658			GO:0043531	AT3G07040.1	RPM1,RPS3	NB-ARC domain-containing disease resistance protein
Glyma.15G169300.1	11.1587	12.4457	13.2859	5.77377	6.34623	9.58373	14.888	26.9789	15.244	-1.39582	-0.7653	0.630523	PF00320	PTHR10071				GO:0003700,GO:0008270,GO:0043565,GO:0006355	AT5G56860.1	GATA21,GNC	GATA type zinc finger transcription factor family protein
Glyma.20G133500.1	311.43	198.175	201.06	157.047	137.502	150.145	267.985	281.883	246.594	-0.840793	-0.676356	0.164437		PTHR12981	KOG3970				AT2G14835.1		RING/U-box superfamily protein
Glyma.04G040000.1	11.1587	18.1899	21.2574	144.344	48.6545	79.8644	17.8656	10.2334	9.86374	2.84552	2.4308	-0.414725	PF02458					GO:0016747	AT5G42830.1		HXXXD-type acyl-transferase family protein
Glyma.06G017800.1	40.5771	108.182	90.3441	94.6899	108.944	102.226	152.851	93.961	175.754	-0.466303	0.355237	0.82154	PF02042,PF00564					GO:0005515	AT1G20640.1		Plant regulator RWP-RK family protein
Glyma.09G266800.1	6.08657	4.78682	8.85726	5.77377	8.46164	8.51887	1.98507	9.30307	9.86374	0.105352	0.2057	0.100347
Glyma.07G122200.1	5.07214	0.957365	2.65718	24.2499	8.46164	5.3243	7.94029	4.65154	8.07033	0.880367	2.13048	1.25011	PF00032	PTHR19271				GO:0009055,GO:0016491,GO:0016020	AT2G07727.1		Di-haem cytochrome, transmembrane;Cytochrome b/b6, C-terminal
Glyma.06G068200.1	238.391	181.899	210.803	69.2853	52.8853	58.5673	175.679	182.34	223.279	-1.68538	-1.80395	-0.118574	PF00141			1.11.1.11	K00434	GO:0004601,GO:0020037,GO:0006979,GO:0055114	AT4G32320.1	APX6	ascorbate peroxidase 6
Glyma.19G208200.1	1101.67	901.838	931.784	1526.59	1390.88	1217.13	1446.12	1373.13	1310.98	0.00152334	0.494245	0.492722	PF01280	PTHR10722	KOG1696		K02885	GO:0003735,GO:0006412,GO:0005622,GO:0005840	AT3G16780.1		Ribosomal protein L19e family protein
Glyma.06G059000.1	44.6349	25.8488	36.3148	48.4997	44.4236	47.9187	24.8134	50.2366	26.9011	0.4662	0.399186	-0.0670137	PF00443,PF01753	PTHR24006,PTHR24006:SF250	KOG1865			GO:0004221,GO:0006511	AT2G24640.1	UBP19	ubiquitin-specific protease 19
Glyma.03G086400.1	1021.53	947.791	1051.36	1493.1	1512.52	1289.54	1615.85	1451.28	1649.04	-0.134902	0.50784	0.642742	PF01201	PTHR10394	KOG3283				AT5G59240.1		Ribosomal protein S8e family protein
Glyma.02G273000.1	49.707	31.593	34.5433	78.5233	106.828	105.421	72.4551	93.0307	87.877	0.198687	1.32772	1.12903		PTHR12581	KOG2874		K06961		AT5G08420.1		RNA-binding KH domain-containing protein
Glyma.13G164000.1	12.1731	4.78682	8.85726	10.3928	6.34623	8.51887	8.93282	8.37277	4.48352	0.213128	-0.0315995	-0.244727							AT2G12462.1
Glyma.16G050100.1	38.5483	67.0155	54.915	42.7259	82.501	57.5024	110.171	118.149	140.782	-1.01432	0.187325	1.20164	PF00153	PTHR24089:SF22,PTHR24089	KOG0767				AT5G14040.1	PHT3;1	phosphate transporter 3;1
Glyma.19G179500.1	203.9	205.833	230.289	140.88	171.348	139.497	176.671	172.107	155.13	-0.157716	-0.502678	-0.344962	PF04749	PTHR15907,PTHR15907:SF11					AT2G37110.1		PLAC8 family protein
Glyma.10G030300.1	64.9234	61.2713	67.3152	46.1902	60.2892	66.0213	52.6044	69.7731	49.3187	0.00674427	-0.165806	-0.17255							AT1G03060.1	SPI	Beige/BEACH domain ;WD domain, G-beta repeat protein
Glyma.10G267200.1	1494.25	1894.62	1775.88	1368.38	1413.09	1509.97	2130.97	2046.68	2157.47	-0.561907	-0.267236	0.294671	PF00006,PF02874,PF00306,PF11421	PTHR15184,PTHR15184:SF8	KOG1350	3.6.3.14	K02133	GO:0005524,GO:0016820,GO:0015991,GO:0033178,GO:0015992,GO:0046034,GO:0016887,GO:0006200,GO:0006754,GO:0000275	AT5G08680.1		ATP synthase alpha/beta family protein
Glyma.14G026700.1	301.285	259.446	248.889	378.76	400.87	329.041	295.776	221.413	234.04	0.561508	0.453515	-0.107993	PF00023,PF00069	PTHR23257,PTHR23257:SF89	KOG0192			GO:0005515,GO:0004672,GO:0005524,GO:0006468	AT3G58760.1		Integrin-linked protein kinase family
Glyma.03G248800.1	86.2264	68.9303	77.0582	124.714	88.8473	117.135	78.4103	77.2155	94.1539	0.404846	0.510042	0.105196	PF04576						AT1G08800.1		Protein of unknown function, DUF593
Glyma.04G106300.1	12.1731	8.61628	5.31436	9.23804	3.17312	11.7135	7.94029	15.8152	17.9341	-0.789182	-0.113754	0.675428	PF00400	PTHR22848				GO:0005515	AT1G73720.1	SMU1	transducin family protein / WD-40 repeat family protein
Glyma.17G046900.1	66.9523	67.9729	55.8007	151.273	167.117	165.053	134.985	134.895	125.539	0.289969	1.34185	1.05188	PF08161	PTHR21576,PTHR21576:SF2	KOG1248				AT2G34357.1		ARM repeat superfamily protein
Glyma.07G250500.1	10.1443	4.78682	4.42863	8.08328	5.28853	2.12972	0.992536	0.930307	0.896704	2.45888	-0.320649	-2.77952	PF00462	PTHR10168	KOG1752			GO:0009055,GO:0015035,GO:0045454	AT5G18600.1		Thioredoxin superfamily protein
Glyma.11G117900.1	23.3319	18.1899	21.2574	12.7023	16.9233	27.6863	8.93282	18.6061	14.3473	0.452359	-0.131452	-0.583811							AT4G39300.1
Glyma.13G300200.1	322.588	261.361	315.318	551.973	451.64	336.495	287.835	295.838	232.246	0.715851	0.575528	-0.140323	PF01200	PTHR10769	KOG3502		K02979	GO:0003735,GO:0006412,GO:0005622,GO:0005840	AT3G10090.1		Nucleic acid-binding, OB-fold-like protein
Glyma.05G118500.1	301.285	376.244	338.347	420.331	380.774	359.922	311.656	235.368	295.912	0.461906	0.192676	-0.26923	PF07970	PTHR10984	KOG2667				AT1G36050.2		Endoplasmic reticulum vesicle transporter protein
Glyma.15G000800.1	59.8513	77.5465	70.8581	50.8092	46.539	48.9835	56.5745	59.5397	58.2857	-0.253157	-0.509114	-0.255958	PF02536	PTHR13068,PTHR13068:SF3	KOG1267				AT1G78930.1		Mitochondrial transcription termination factor family protein
Glyma.14G106900.1	2.02886	0.957365	2.65718	1.15475	1.05771	2.12972	0.992536	1.86061	0.896704	0.211585	-0.378146	-0.58973							AT1G57700.1		Protein kinase superfamily protein
Glyma.17G082600.1	3.04329	3.82946	3.5429	2.30951	1.05771	2.12972	2.97761	1.86061	3.58681	-0.616056	-0.922054	-0.305998							AT5G60830.1	AtbZIP70,bZIP70	basic leucine-zipper 70
Glyma.15G202400.1	35.505	21.062	21.2574	18.4761	22.2118	21.2972	24.8134	27.9092	23.3143	-0.294779	-0.328303	-0.0335236
Glyma.10G260100.1	4.05771	8.61628	7.97153	6.92853	10.5771	4.25944	4.96268	5.58184	8.07033	0.225557	0.0761818	-0.149375	PF01535	PTHR24015					AT3G08820.1		Pentatricopeptide repeat (PPR) superfamily protein
Glyma.12G089900.1	4.05771	12.4457	12.4002	18.4761	26.4426	13.8432	4.96268	8.37277	3.58681	1.79596	1.02363	-0.772328	PF00786,PF00620	PTHR23177:SF2,PTHR23177				GO:0007165	AT5G22400.1		Rho GTPase activating protein with PAK-box/P21-Rho-binding domain
Glyma.03G249900.1	66.9523	98.6086	132.859	175.523	117.405	142.691	94.2909	92.1004	93.2572	0.639453	0.545724	-0.0937284	PF05042						AT5G55240.1	ATPXG2	ARABIDOPSIS THALIANA PEROXYGENASE 2
Glyma.04G083700.1	1.01443	0.957365	0.885726	1.15475	1.05771	1.06486	0.992536	0.930307	0.896704	0.217053	0.197753	-0.0193	PF03016	PTHR11062,PTHR11062:SF37	KOG1021				AT4G32790.1		Exostosin family protein
Glyma.18G212400.1	273.896	234.554	186.888	504.628	475.968	547.338	292.798	287.465	246.594	0.885872	1.13579	0.249922							AT3G51650.1
Glyma.06G015600.1	62.8946	91.907	64.658	23.0951	24.3272	30.8809	29.7761	53.9578	43.0418	-0.695134	-1.48681	-0.791677	PF01529	PTHR22883	KOG1311			GO:0008270	AT2G33640.1		DHHC-type zinc finger family protein
Glyma.19G143600.1	13.1876	31.593	20.3717	41.5712	43.3659	45.7889	33.7462	38.1426	21.5209	0.484902	1.00466	0.519756							AT2G42320.1		nucleolar protein gar2-related
Glyma.12G089700.1	360.122	390.605	386.177	289.843	302.504	378.025	346.395	365.611	359.578	-0.143135	-0.2285	-0.0853649	PF04815,PF04810,PF04811	PTHR13803	KOG1985			GO:0008270,GO:0006886,GO:0006888,GO:0030127	AT2G27460.1		sec23/sec24 transport family protein
Glyma.14G077000.1	194.77	177.112	179.802	159.356	185.098	125.653	202.477	241.88	213.415	-0.484597	-0.230853	0.253744	PF05063	PTHR14475,PTHR14475:SF2				GO:0008168,GO:0006139	AT1G19340.1		Methyltransferase MT-A70 family protein
Glyma.09G285900.1	810.529	821.419	675.809	538.116	465.39	487.705	923.058	819.601	826.761	-0.784958	-0.630006	0.154952	PF01156	PTHR12304	KOG2938				AT1G05620.1	URH2	uridine-ribohydrolase 2
Glyma.10G250300.1	1.01443	0.957365	5.31436	2.30951	3.17312	2.12972	4.96268	2.79092	0.896704	-0.18441	0.0631842	0.247594	PF07859	PTHR23024:SF10,PTHR23024	KOG1515			GO:0016787,GO:0008152	AT3G48700.1	ATCXE13,CXE13	carboxyesterase 13
Glyma.07G173400.1	12.1731	2.87209	5.31436	3.46426	6.34623	2.12972	8.93282	4.65154	4.48352	-0.597598	-0.76988	-0.172282
Glyma.11G193500.1	78.111	106.267	77.9439	198.618	288.754	209.777	120.097	80.9367	130.022	1.07439	1.41013	0.335733	PF03016	PTHR11062:SF35,PTHR11062	KOG1021				AT2G28110.1	FRA8,IRX7	Exostosin family protein
Glyma.08G094200.1	47.6782	34.4651	22.1432	12.7023	12.6925	14.908	31.7611	26.0486	9.86374	-0.747711	-1.3716	-0.623889		PTHR10042:SF14,PTHR10042					AT1G66140.1	ZFP4	zinc finger protein 4
Glyma.08G134900.1	21.303	34.4651	28.3432	41.5712	38.0774	33.0106	27.791	15.8152	23.3143	0.751445	0.421593	-0.329852	PF00646					GO:0005515	AT3G23880.1		F-box and associated interaction domains-containing protein
Glyma.08G132300.1	20.2886	43.0814	53.1436	127.023	70.8663	102.226	54.5895	33.4911	25.1077	1.4068	1.36502	-0.0417736	PF04724	PTHR12224		2.4.1.144	K00737	GO:0003830,GO:0006487,GO:0016020	AT1G12990.1		beta-1,4-N-acetylglucosaminyltransferase family protein
Glyma.18G108200.1	9.12986	5.74419	7.97153	13.8571	31.7312	11.7135	24.8134	26.0486	31.3846	-0.521379	1.32666	1.84804	PF01535	PTHR24015,PTHR24015:SF20					AT5G15280.1		Pentatricopeptide repeat (PPR) superfamily protein
Glyma.02G176100.1	2.02886	0.957365	3.5429	2.30951	3.17312	6.38915	0.992536	0.930307	0.896704	2.074	0.862575	-1.21143
Glyma.19G203600.1	1.01443	0.957365	1.77145	6.92853	1.05771	2.12972	0.992536	2.79092	0.896704	1.112	1.43427	0.322269
Glyma.18G244800.1	9.12986	7.65892	9.74299	35.7974	33.8466	18.1026	18.8582	24.188	14.3473	0.612457	1.72562	1.11317	PF12253	PTHR15272	KOG4364				AT1G65470.1	FAS1,NFB2	chromatin assembly factor-1 (FASCIATA1) (FAS1)
Glyma.10G144100.1	1.01443	3.82946	6.20008	15.0118	6.34623	3.19458	7.94029	17.6758	10.7604	-0.567132	1.15262	1.71975	PF07983	PTHR16631:SF1,PTHR16631					AT1G09460.1		Carbohydrate-binding X8 domain superfamily protein
Glyma.11G203600.1	382.44	224.981	265.718	461.902	391.351	413.165	207.44	202.807	219.692	1.00747	0.536472	-0.470997	PF07466						AT1G54520.1
Glyma.13G110800.1	88.2553	147.434	104.516	180.142	232.695	258.761	129.03	102.334	127.332	0.904838	0.981192	0.0763543	PF00082,PF02225,PF05922	PTHR10795:SF17,PTHR10795				GO:0004252,GO:0006508,GO:0042802,GO:0043086	AT2G05920.1		Subtilase family protein
Glyma.06G306800.1	260.708	249.872	227.632	536.961	397.697	454.695	215.38	169.316	229.556	1.17751	0.912306	-0.265204							AT3G21810.1		Zinc finger C-x8-C-x5-C-x3-H type family protein
Glyma.09G230800.1	401.714	487.299	445.52	393.771	475.968	475.992	432.746	355.377	541.609	0.0172544	0.0120554	-0.00519897	PF00076,PF00013	PTHR11208,PTHR11208:SF6	KOG0119		K13095	GO:0003723,GO:0003676	AT5G51300.1		splicing factor-related
Glyma.13G357000.1	8.11543	6.70155	13.2859	11.5475	13.7502	10.6486	6.94775	17.6758	6.27693	0.218213	0.355126	0.136913	PF01535	PTHR24015					AT3G63370.1	OTP86	Tetratricopeptide repeat (TPR)-like superfamily protein
Glyma.07G086800.1	323.603	211.578	201.946	311.784	318.369	299.225	270.962	255.835	247.49	0.263398	0.334355	0.0709574	PF07896		KOG3245				AT5G67490.1
Glyma.02G252800.1	7942.98	6870.05	6123.91	12574.1	12804.6	11706	5678.3	5450.67	5191.91	1.18411	0.824774	-0.359331	PF00011	PTHR11527,PTHR11527:SF14	KOG3591		K13993		AT1G53540.1		HSP20-like chaperones superfamily protein
Glyma.17G170000.1	49.707	55.5272	44.2863	45.0354	38.0774	48.9835	39.7014	31.6304	25.1077	0.453893	-0.178752	-0.632646							AT3G14750.1
Glyma.08G340300.1	1.01443	0.957365	1.77145	4.61902	1.05771	3.19458	0.992536	3.72123	2.69011	0.260865	1.24486	0.983991	PF00069,PF07714	PTHR24420:SF536,PTHR24420	KOG1187			GO:0004672,GO:0005524,GO:0006468	AT2G32800.1	AP4.3A	protein kinase family protein
Glyma.09G272800.1	42.606	65.1008	69.9724	92.3804	105.771	102.226	72.4551	64.1912	115.675	0.251515	0.757502	0.505986							AT3G08670.1
Glyma.01G200000.1	112.602	76.5892	78.8296	71.5948	101.54	78.7996	90.3208	121.87	69.9429	-0.163334	-0.0892963	0.0740374							AT5G64816.1
Glyma.13G228300.1	14.202	40.2093	41.6291	95.8447	104.713	94.7725	34.7388	24.188	34.0747	1.667	1.62061	-0.0463883	PF07714,PF00560	PTHR24420:SF4,PTHR24420	KOG1187			GO:0004672,GO:0005524,GO:0006468,GO:0005515	AT5G45800.1	MEE62	Leucine-rich repeat protein kinase family protein
Glyma.06G231100.1	21.303	10.531	15.9431	12.7023	9.51935	20.2323	32.7537	16.7455	14.3473	-0.588707	-0.170419	0.418288
Glyma.05G040100.1	1.01443	1.91473	0.885726	1.15475	1.05771	1.06486	0.992536	2.79092	1.79341	-0.766938	-0.219123	0.547815	PF00106	PTHR24322:SF98,PTHR24322	KOG1208			GO:0016491,GO:0008152	AT5G50130.1		NAD(P)-binding Rossmann-fold superfamily protein
Glyma.15G156700.1	94.3419	44.9961	63.7723	65.821	53.943	66.0213	25.8059	38.1426	18.8308	1.16629	-0.128627	-1.29492	PF00702	PTHR12725:SF5,PTHR12725	KOG3085				AT5G44730.1		Haloacid dehalogenase-like hydrolase (HAD) superfamily protein
Glyma.10G274000.1	928.202	754.403	826.382	1070.46	869.434	923.233	727.529	590.745	662.664	0.531407	0.190485	-0.340922							AT1G68490.1
Glyma.11G231900.1	13.1876	7.65892	7.97153	8.08328	13.7502	10.6486	1.98507	10.2334	2.69011	1.1235	0.172671	-0.95083
Glyma.18G098900.1	412.872	392.52	366.691	346.426	353.274	428.073	445.649	440.966	444.765	-0.239444	-0.0555969	0.183847							AT5G54930.1		AT hook motif-containing protein
Glyma.05G208700.1	9.12986	0.957365	0.885726	1.15475	1.05771	1.06486	1.98507	0.930307	0.896704	-0.218063	-1.74336	-1.5253	PF00230	PTHR19139,PTHR19139:SF55	KOG0223		K09872	GO:0005215,GO:0006810,GO:0016020	AT4G00430.1	PIP1;4,PIP1E,TMP-C	plasma membrane intrinsic protein 1;4
Glyma.20G226300.1	126.804	143.605	128.43	116.63	131.155	112.875	215.38	183.271	225.073	-0.790264	-0.145162	0.645102	PF00731,PF02222	PTHR23047,PTHR23047:SF1	KOG2835	4.1.1.21	K11808	GO:0034023,GO:0006189,GO:0005524,GO:0008716	AT2G37690.1		phosphoribosylaminoimidazole carboxylase, putative / AIR carboxylase, putative
Glyma.04G111400.1	8.11543	3.82946	3.5429	8.08328	1.05771	3.19458	0.992536	2.79092	2.69011	0.930191	-0.328308	-1.2585							AT4G33925.1
Glyma.18G021400.1	189.698	155.093	178.917	182.451	141.733	148.015	173.694	120.01	164.993	0.0418545	-0.149367	-0.191221		PTHR18901	KOG2914				AT3G10970.1		Haloacid dehalogenase-like hydrolase (HAD) superfamily protein
Glyma.08G241600.1	111.587	152.221	177.145	203.237	254.907	233.204	231.261	208.389	241.213	0.0220476	0.648786	0.626738	PF00027	PTHR10217,PTHR10217:SF30	KOG0498		K05391		AT5G15410.1	ATCNGC2,CNGC2,DND1	Cyclic nucleotide-regulated ion channel family protein
Glyma.18G135000.1	78.111	47.8682	30.1147	90.0709	88.8473	103.291	60.5447	33.4911	39.455	1.08003	0.854352	-0.225675							AT1G23965.1
Glyma.15G144900.1	21.303	22.0194	15.0573	38.1069	27.5003	24.4918	24.8134	30.7001	21.5209	0.226008	0.626044	0.400036
Glyma.12G171900.1	55.7936	70.845	81.4868	75.0591	68.7509	66.0213	59.5522	103.264	78.9099	-0.204145	0.0117763	0.215921	PF00330	PTHR11670,PTHR11670:SF1				GO:0008152	AT4G26970.1	ACO2	aconitase 2
Glyma.06G133300.1	1749.89	1609.33	1836.11	2011.58	1890.12	1796.42	2230.23	2121.1	1978.13	-0.151596	0.133271	0.284866	PF00173	PTHR19359	KOG0537			GO:0020037	AT5G53560.1	ATB5-A,ATCB5-E,B5 #2,CB5-E	cytochrome B5 isoform E
Glyma.17G257800.1	124.775	111.054	118.687	170.904	206.253	205.518	188.582	173.967	192.791	0.0693164	0.716837	0.647521	PF00349,PF03727	PTHR19443	KOG1369	2.7.1.1	K00844	GO:0005524,GO:0016773,GO:0005975	AT1G47840.1	HXK3	hexokinase 3
Glyma.02G268300.1	2.02886	0.957365	0.885726	1.15475	1.05771	1.06486	0.992536	2.79092	2.69011	-0.982045	-0.240543	0.741502						GO:0005515	AT3G18670.1		Ankyrin repeat family protein
Glyma.04G110500.1	91.2986	67.9729	54.915	80.8328	62.4046	91.5779	98.2611	81.867	71.7363	-0.10112	0.132659	0.23378							AT4G10140.1
Glyma.11G235500.1	460.551	379.116	424.263	557.747	387.12	375.895	335.477	273.51	382.892	0.413133	0.0634542	-0.349679		PTHR18901	KOG2914				AT3G10970.1		Haloacid dehalogenase-like hydrolase (HAD) superfamily protein
Glyma.09G175700.1	2.02886	3.82946	7.08581	4.61902	1.05771	2.12972	4.96268	4.65154	2.69011	-0.656429	-0.72956	-0.0731316	PF01535	PTHR24015					AT1G62930.1		Tetratricopeptide repeat (TPR)-like superfamily protein
Glyma.02G119700.1	657.35	766.849	640.38	675.532	672.701	767.763	517.111	570.278	616.035	0.312898	0.0354892	-0.277409	PF00069	PTHR24361:SF93,PTHR24361	KOG0576			GO:0004672,GO:0005524,GO:0006468	AT1G69220.1	SIK1	Protein kinase superfamily protein
Glyma.07G147800.1	66.9523	56.4845	37.2005	4.61902	9.51935	14.908	27.791	17.6758	13.4506	-1.02033	-2.46738	-1.44704	PF00069,PF00560,PF08263	PTHR24420,PTHR24420:SF474	KOG1187			GO:0004672,GO:0005524,GO:0006468,GO:0005515	AT3G47570.1		Leucine-rich repeat protein kinase family protein
Glyma.12G236900.1	168.395	106.267	106.287	199.773	176.637	191.675	136.97	144.198	130.919	0.463158	0.576504	0.113346	PF09725	PTHR11567,PTHR11567:SF25	KOG1297		K13121		AT4G15030.1
Glyma.09G143200.1	433.161	538.996	511.064	1056.6	855.684	780.542	573.686	338.632	577.477	0.854007	0.860387	0.00637974	PF00447	PTHR10015,PTHR10015:SF7				GO:0003700,GO:0043565,GO:0006355,GO:0005634	AT5G62020.1	AT-HSFB2A,HSFB2A	heat shock transcription factor B2A
Glyma.08G128000.1	3.04329	0.957365	1.77145	4.61902	1.05771	1.06486	0.992536	0.930307	1.79341	0.85924	0.223991	-0.635249	PF00314						AT1G77700.1		Pathogenesis-related thaumatin superfamily protein
Glyma.04G008600.1	117.674	91.907	77.0582	96.9994	76.1548	79.8644	123.074	124.661	154.233	-0.667839	-0.179991	0.487849	PF03171	PTHR10209:SF55,PTHR10209	KOG0143			GO:0016491,GO:0016706,GO:0055114	AT5G20400.1		2-oxoglutarate (2OG) and Fe(II)-dependent oxygenase superfamily protein
Glyma.18G244300.1	326.646	294.868	344.547	390.307	287.696	285.382	285.85	332.12	330.884	0.0219272	-0.00400262	-0.0259298	PF00550	PTHR20863,PTHR20863:SF5	KOG1748	1.6.5.3,1.6.99.3	K03955		AT1G65290.1	mtACP2	mitochondrial acyl carrier protein 2
Glyma.13G031300.1	515.33	547.613	558.893	1197.48	892.704	928.557	385.104	372.123	431.314	1.34476	0.89632	-0.448435	PF04433,PF00249	PTHR12802:SF21,PTHR12802	KOG1279			GO:0003682,GO:0005515	AT1G21700.1	ATSWI3C,CHB4,SWI3C	SWITCH/sucrose nonfermenting 3C
Glyma.07G185100.1	10.1443	2.87209	2.65718	1.15475	3.17312	2.12972	6.94775	4.65154	3.58681	-1.23368	-1.27927	-0.0455812	PF00248	PTHR11732:SF8,PTHR11732					AT4G33670.1		NAD(P)-linked oxidoreductase superfamily protein
Glyma.09G142700.1	1.01443	0.957365	0.885726	2.30951	1.05771	1.06486	0.992536	0.930307	0.896704	0.652519	0.633219	-0.0193	PF00067	PTHR24298:SF44,PTHR24298	KOG0156			GO:0005506,GO:0009055,GO:0016705,GO:0020037,GO:0055114	AT3G48290.2	CYP71A24	cytochrome P450, family 71, subfamily A, polypeptide 24
Glyma.01G203800.1	482.868	688.345	672.266	637.425	749.913	699.612	807.924	724.709	789.099	-0.153806	0.178965	0.332771	PF01214	PTHR11740	KOG3092		K03115	GO:0019887,GO:0005956	AT4G17640.1	CKB2	casein kinase II beta chain 2
Glyma.12G066400.1	317.516	178.07	200.174	244.808	200.964	184.221	257.067	254.904	257.354	-0.288258	-0.143255	0.145003
Glyma.01G052500.1	12.1731	22.0194	15.9431	8.08328	20.0964	8.51887	20.8433	24.188	16.1407	-0.737146	-0.450112	0.287034	PF10250						AT1G14020.1		O-fucosyltransferase family protein
Glyma.19G061100.1	418.959	507.403	488.035	570.449	644.143	531.365	571.701	522.833	584.651	0.0562569	0.30383	0.247573	PF00076	PTHR24012:SF14,PTHR24012	KOG4205		K12741	GO:0003676	AT5G40490.1		RNA-binding (RRM/RBD/RNP motifs) family protein
Glyma.09G089900.1	46.6637	26.8062	24.8003	93.5351	71.924	76.6699	61.5372	53.9578	51.1121	0.539325	1.30095	0.761624	PF05158	PTHR12780	KOG3233			GO:0003677,GO:0003899,GO:0006351	AT5G23710.1		DNA binding;DNA-directed RNA polymerases
Glyma.04G024600.1	11.1587	5.74419	2.65718	6.92853	6.34623	1.06486	5.95522	6.51215	6.27693	-0.386444	-0.447906	-0.0614611	PF05701						AT1G75720.1		Plant protein of unknown function (DUF827)
Glyma.13G306800.1	10.1443	3.82946	7.08581	3.46426	1.05771	4.25944	2.97761	11.1637	6.27693	-1.21733	-1.26195	-0.0446177	PF01753	PTHR12197:SF38,PTHR12197	KOG2084				AT3G21820.1	ATXR2,SDG36	histone-lysine N-methyltransferase ATXR2
Glyma.07G041000.1	176.511	150.306	175.374	84.2971	120.578	96.9022	166.746	184.201	144.369	-0.714863	-0.734749	-0.0198853	PF06814	PTHR21229,PTHR21229:SF1	KOG2568			GO:0016021	AT1G72480.1		Lung seven transmembrane receptor family protein
Glyma.09G257400.1	1.01443	1.91473	0.885726	1.15475	1.05771	1.06486	0.992536	0.930307	1.79341	-0.181331	-0.219123	-0.0377915	PF01554	PTHR11206:SF49,PTHR11206	KOG1347			GO:0015238,GO:0015297,GO:0006855,GO:0055085,GO:0016020	AT4G00350.1		MATE efflux family protein
Glyma.20G223900.1	5.07214	10.531	15.0573	34.6426	39.1351	23.4269	15.8806	14.8849	24.211	0.822211	1.66464	0.842434	PF02466	PTHR15371	KOG3324				AT1G17530.1	ATTIM23-1,TIM23-1	translocase of inner mitochondrial membrane 23
Glyma.11G234300.1	387.512	465.279	643.923	441.116	382.889	339.69	708.671	427.941	565.82	-0.548883	-0.363084	0.185799	PF07107						AT3G10985.1	ATWI-12,SAG20,WI12	senescence associated gene 20
Glyma.01G000500.1	8.11543	4.78682	7.08581	5.77377	5.28853	12.7783	3.97014	10.2334	8.07033	0.0980698	0.254283	0.156213
Glyma.10G187300.1	1077.32	869.287	895.469	1521.97	1046.07	1093.61	817.85	709.824	696.739	0.719069	0.365546	-0.353522	PF01012	PTHR21294	KOG3180		K03521		AT5G43430.1	ETFBETA	electron transfer flavoprotein beta
Glyma.16G168500.1	3.04329	3.82946	7.08581	3.46426	5.28853	2.12972	0.992536	1.86061	0.896704	1.5371	-0.359138	-1.89624							AT1G43700.1	SUE3,VIP1	VIRE2-interacting protein 1
Glyma.16G148500.1	1961.91	1357.54	1455.25	1263.3	1170.88	1072.31	1719.07	1727.58	1576.41	-0.518536	-0.445379	0.073157	PF01667	PTHR11594	KOG1779		K02978	GO:0003735,GO:0006412,GO:0005622,GO:0005840	AT3G61110.1	ARS27A,RS27A	ribosomal protein S27
Glyma.14G025600.1	139.991	134.988	146.145	87.7614	107.886	95.8373	167.739	146.989	158.717	-0.699773	-0.530826	0.168946	PF08212	PTHR11430:SF32,PTHR11430	KOG4824				AT3G47860.1	CHL	chloroplastic lipocalin
Glyma.19G135200.1	2375.79	1998.98	2175.34	4718.33	3947.36	3821.78	2096.24	1814.1	1854.38	1.11516	0.930889	-0.18427							AT5G04000.2
Glyma.08G125100.1	1008.34	1389.14	1441.08	1102.79	814.433	849.758	140.94	98.6126	177.547	2.72985	-0.47225	-3.2021	PF00067	PTHR24286	KOG0157			GO:0005506,GO:0009055,GO:0016705,GO:0020037,GO:0055114	AT5G36110.1	CYP716A1	cytochrome P450, family 716, subfamily A, polypeptide 1
Glyma.05G231400.1	14.202	11.4884	10.6287	9.23804	8.46164	14.908	7.94029	3.72123	2.69011	1.184	-0.155515	-1.33951	PF00071	PTHR24073,PTHR24073:SF254	KOG0092			GO:0003924,GO:0005525,GO:0007264,GO:0005634,GO:0005737,GO:0005622	AT5G45130.1	ATRAB-F2A,ATRAB5A,ATRABF2A,RAB-F2A,RAB5A,RABF2A,RHA1	RAB homolog 1
Glyma.19G096500.1	269.838	239.341	247.118	456.128	359.62	325.847	388.082	307.001	303.983	0.1924	0.594026	0.401627	PF00240						AT4G24990.1	ATGP4	Ubiquitin family protein
Glyma.07G042300.1	22.3174	2.87209	5.31436	6.92853	3.17312	10.6486	17.8656	4.65154	6.27693	-0.472646	-0.555865	-0.0832192
Glyma.04G098900.1	166.366	221.151	158.545	96.9994	141.733	123.524	123.074	145.128	132.712	-0.146287	-0.592058	-0.445771	PF02922,PF00128,PF02806	PTHR10357:SF75,PTHR10357	KOG0470	3.2.1.-	K02438	GO:0003824,GO:0043169,GO:0005975,GO:0004553	AT4G09020.1	ATISA3,ISA3	isoamylase 3
Glyma.06G312800.1	164.337	160.837	170.059	99.3089	96.2512	127.783	133	152.57	165.89	-0.481533	-0.615044	-0.133511	PF03643	PTHR12233	KOG3063			GO:0007034,GO:0030904	AT5G53530.1	VPS26A	vacuolar protein sorting 26A
Glyma.11G042400.1	293.17	399.221	385.291	393.771	475.968	399.322	430.761	354.447	424.141	0.0695314	0.23583	0.166299	PF01458				K09015	GO:0016226	AT1G32500.1	ATNAP6,NAP6	non-intrinsic ABC protein 6
Glyma.08G156700.1	1.01443	3.82946	0.885726	2.30951	3.17312	1.06486	0.992536	0.930307	0.896704	1.21548	0.192503	-1.02297
Glyma.18G260400.1	73.0389	89.9923	76.1724	63.5115	50.7699	55.3727	111.164	130.243	85.1869	-0.944902	-0.495643	0.449259		PTHR10759:SF2,PTHR10759					AT3G01170.1		Ribosomal protein L34e superfamily protein
Glyma.11G232500.1	221.145	210.62	241.803	359.129	375.485	333.301	350.365	364.68	363.165	-0.0138421	0.6649	0.678742	PF07541,PF00575	PTHR10602	KOG2916		K03237	GO:0003723,GO:0003743,GO:0005850	AT2G40290.1		Eukaryotic translation initiation factor 2 subunit 1
Glyma.06G176800.1	67.9667	108.182	85.9154	43.8807	56.0584	57.5024	70.4701	103.264	63.666	-0.592505	-0.735106	-0.1426	PF00069	PTHR13902,PTHR13902:SF34	KOG0584			GO:0004672,GO:0005524,GO:0006468	AT3G48260.1	WNK3	with no lysine (K) kinase 3
Glyma.13G295500.1	911.971	1196.71	1188.64	921.494	1012.22	931.752	1642.65	1437.32	1656.21	-0.724953	-0.202523	0.52243	PF00153	PTHR24089:SF35,PTHR24089	KOG0749		K05863		AT4G28390.1	AAC3,ATAAC3	ADP/ATP carrier 3
Glyma.02G111900.1	3.04329	10.531	7.08581	21.9403	9.51935	12.7783	7.94029	17.6758	4.48352	0.55554	1.09844	0.542899	PF07059						AT1G13970.1		Protein of unknown function (DUF1336)
Glyma.08G096300.1	143.034	226.895	135.516	116.63	98.3666	123.524	315.626	293.977	299.499	-1.4252	-0.578314	0.846886	PF02779,PF02780	PTHR11624:SF42,PTHR11624	KOG0524	1.2.4.1	K00162	GO:0003824,GO:0008152	AT2G34590.1		Transketolase family protein
Glyma.14G084000.1	4.05771	3.82946	6.20008	12.7023	6.34623	3.19458	2.97761	6.51215	6.27693	0.496479	0.658968	0.162489
Glyma.20G091700.1	3.04329	1.91473	4.42863	1.15475	1.05771	2.12972	4.96268	3.72123	0.896704	-1.1417	-1.11219	0.0295082							AT3G05858.1
Glyma.02G252400.1	2.02886	9.57365	13.2859	4.61902	3.17312	3.19458	1.98507	16.7455	0.896704	-0.837102	-1.17971	-0.342611	PF00010	PTHR23042:SF24,PTHR23042				GO:0046983	AT5G65640.1	bHLH093	beta HLH protein 93
Glyma.18G017100.1	162.309	168.496	154.116	257.51	308.85	241.723	240.194	254.904	260.044	0.0977562	0.736754	0.638998	PF00276	PTHR12059,PTHR12059:SF5	KOG4089			GO:0003735,GO:0006412,GO:0005840	AT4G39880.1		Ribosomal protein L23/L15e family protein
Glyma.06G317800.1	1.01443	1.91473	1.77145	1.15475	1.05771	1.06486	3.97014	2.79092	3.58681	-1.65875	-0.520332	1.13842	PF04511	PTHR11009	KOG0858				AT4G29330.1	DER1	DERLIN-1
Glyma.02G183600.1	21.303	15.3178	15.9431	18.4761	17.981	19.1675	0.992536	0.930307	0.896704	4.30219	0.0816489	-4.22054	PF00560	PTHR24420:SF671,PTHR24420				GO:0005515	AT2G41820.1		Leucine-rich repeat protein kinase family protein
Glyma.14G085100.1	242.448	226.895	224.089	172.058	162.887	225.75	269.97	300.489	244.8	-0.540042	-0.306539	0.233503	PF00155	PTHR13693,PTHR13693:SF2	KOG1358	2.3.1.50	K00654	GO:0030170,GO:0009058	AT4G36480.1	ATLCB1,EMB2779,FBR11,LCB1	long-chain base1
Glyma.02G303700.1	55.7936	32.5504	23.9146	35.7974	17.981	23.4269	60.5447	47.4457	78.9099	-1.2755	-0.540054	0.735443	PF01490	PTHR22950	KOG1303			GO:0003333	AT5G23810.1	AAP7	amino acid permease 7
Glyma.11G251900.1	2.02886	5.74419	3.5429	2.30951	8.46164	5.3243	4.96268	1.86061	7.17363	0.201543	0.508295	0.306752	PF00023,PF00612,PF03859,PF01833	PTHR23335	KOG0520			GO:0005515,GO:0003677,GO:0005634	AT1G67310.1		Calmodulin-binding transcription activator protein with CG-1 and Ankyrin domains
Glyma.10G107900.1	4.05771	7.65892	9.74299	3.46426	1.05771	5.3243	2.97761	6.51215	5.38022	-0.594754	-1.12398	-0.529222	PF00201	PTHR11926,PTHR11926:SF15	KOG1192			GO:0016758,GO:0008152	AT2G36770.1		UDP-Glycosyltransferase superfamily protein
Glyma.01G193700.1	73.0389	60.314	63.7723	47.3449	65.5777	55.3727	61.5372	62.3306	82.4967	-0.2942	-0.228116	0.0660836	PF01459	PTHR11743,PTHR11743:SF14	KOG3126			GO:0055085,GO:0005741	AT5G67500.1	ATVDAC2,VDAC2	voltage dependent anion channel 2
Glyma.13G144200.1	35.505	65.1008	54.0293	114.321	127.982	130.978	34.7388	32.5608	34.0747	1.88057	1.27139	-0.609176	PF05178	PTHR14490,PTHR14490:SF5	KOG2409				AT3G24080.1		KRR1 family protein
Glyma.14G015300.1	3.04329	11.4884	3.5429	5.77377	8.46164	7.45401	11.9104	11.1637	12.5539	-0.716018	0.263031	0.979049	PF00664,PF00005	PTHR24223,PTHR24223:SF20	KOG0054			GO:0005524,GO:0016887,GO:0042626,GO:0006810,GO:0055085,GO:0016021	AT3G13080.1	ATMRP3,MRP3	multidrug resistance-associated protein 3
Glyma.17G176400.1	13.1876	3.82946	2.65718	10.3928	2.11541	2.12972	4.96268	7.44246	2.69011	-0.0443837	-0.426595	-0.382211	PF04784	PTHR23054					AT4G37080.2		Protein of unknown function, DUF547
Glyma.16G208100.1	8.11543	6.70155	7.97153	1.15475	4.23082	7.45401	2.97761	4.65154	3.58681	0.195046	-0.827708	-1.02275	PF07859	PTHR23024,PTHR23024:SF10	KOG1515			GO:0016787,GO:0008152	AT5G23530.1	AtCXE18,CXE18	carboxyesterase 18
Glyma.08G348400.1	593.441	692.175	674.923	725.186	766.837	603.775	666.984	580.512	616.932	0.168766	0.0962493	-0.072517	PF00498	PTHR13233				GO:0005515	AT3G07220.1		SMAD/FHA domain-containing protein
Glyma.12G185700.1	72.0244	81.376	83.2582	46.1902	53.943	67.0861	64.5148	92.1004	81.6	-0.510525	-0.501067	0.00945816	PF00795	PTHR23088	KOG0806			GO:0016810,GO:0006807	AT2G27450.1	ATNLP1,CPA,NLP1	nitrilase-like protein 1
Glyma.17G235600.1	291.141	376.244	354.29	823.34	740.394	725.169	227.291	148.849	244.8	1.88213	1.16372	-0.718412	PF00514	PTHR23315:SF35,PTHR23315				GO:0005515	AT3G01400.1		ARM repeat superfamily protein
Glyma.08G204700.1	11.1587	10.531	8.85726	10.3928	9.51935	13.8432	19.8507	10.2334	13.4506	-0.36705	0.144084	0.511134	PF00046,PF01852	PTHR24325:SF193,PTHR24325	KOG0483		K09338	GO:0003700,GO:0043565,GO:0006355	AT1G79840.1	GL2	HD-ZIP IV family of homeobox-leucine zipper protein with lipid-binding START domain
Glyma.02G005300.1	1.01443	2.87209	0.885726	1.15475	6.34623	8.51887	0.992536	1.86061	0.896704	2.09496	1.74712	-0.347835	PF00415,PF01363,PF08381	PTHR22870:SF25,PTHR22870	KOG1427			GO:0046872	AT4G14368.1		Regulator of chromosome condensation (RCC1) family protein
Glyma.20G024400.1	414.901	475.81	429.577	540.425	566.93	491.965	612.395	524.693	602.585	-0.121357	0.276605	0.397963	PF01029					GO:0003723,GO:0006355	AT4G26370.1		antitermination NusB domain-containing protein
Glyma.18G267000.1	189.698	369.543	324.176	341.807	327.889	386.544	213.395	164.664	176.651	0.929131	0.257772	-0.67136	PF00560,PF00069,PF08263	PTHR24420,PTHR24420:SF99	KOG1187			GO:0004672,GO:0005524,GO:0006468,GO:0005515	AT3G02130.1	RPK2,TOAD2	receptor-like protein kinase 2
Glyma.07G137300.1	7.101	3.82946	0.885726	1.15475	1.05771	4.25944	0.992536	1.86061	0.896704	0.787354	-0.868504	-1.65586	PF00696	PTHR11063,PTHR11063:SF2	KOG4165				AT3G55610.1	P5CS2	delta 1-pyrroline-5-carboxylate synthase 2
Glyma.13G098500.1	368.238	387.733	337.462	266.748	255.965	250.242	401.977	373.984	346.128	-0.53773	-0.500407	0.0373226	PF01263	PTHR11122	KOG1594			GO:0016853,GO:0005975	AT5G57330.1		Galactose mutarotase-like superfamily protein
Glyma.19G150200.1	7.101	1.91473	0.885726	5.77377	3.17312	3.19458	0.992536	0.930307	1.79341	1.70802	0.29423	-1.41379							AT5G01910.1
Glyma.02G033800.1	4.05771	1.91473	7.97153	3.46426	3.17312	3.19458	3.97014	0.930307	2.69011	0.373272	-0.504092	-0.877364
Glyma.02G248500.1	10.1443	2.87209	3.5429	4.61902	10.5771	4.25944	5.95522	6.51215	11.6571	-0.310321	0.232538	0.542859	PF03330,PF01357						AT2G39700.1	ATEXP4,ATEXPA4,ATHEXP ALPHA 1.6,EXPA4	expansin A4
Glyma.19G107400.1	31.4473	28.7209	27.4575	41.5712	44.4236	39.3998	17.8656	28.8395	25.1077	0.804161	0.517049	-0.287112	PF03463,PF03465,PF03464	PTHR10113	KOG0688				AT3G26618.1	ERF1-3	eukaryotic release factor 1-3
Glyma.12G107700.1	92.313	134.988	127.545	123.559	150.194	116.07	123.074	111.637	109.398	0.179951	0.135625	-0.0443266	PF02485	PTHR19297,PTHR19297:SF2	KOG0799			GO:0008375,GO:0016020	AT4G03340.1		Core-2/I-branching beta-1,6-N-acetylglucosaminyltransferase family protein
Glyma.06G173600.1	6.08657	14.3605	7.97153	11.5475	12.6925	11.7135	6.94775	3.72123	8.96704	0.872628	0.339296	-0.533332
Glyma.02G016100.1	948.491	958.322	1017.7	1333.74	1267.13	1098.93	443.664	703.312	279.772	1.37472	0.339254	-1.03547	PF00847				K09286	GO:0003700,GO:0006355	AT2G47520.1	HRE2	Integrase-type DNA-binding superfamily protein
Glyma.13G287000.1	284.04	315.93	349.862	404.164	347.985	364.182	292.798	269.789	331.78	0.319825	0.23302	-0.0868047	PF00400,PF12490	PTHR13268	KOG2109			GO:0005515	AT5G54730.1	ATATG18F,ATG18F,G18F	homolog of yeast autophagy 18 (ATG18) F
Glyma.04G179500.1	9.12986	18.1899	15.0573	21.9403	19.0387	8.51887	15.8806	18.6061	10.7604	0.12954	0.224082	0.0945415	PF02704						AT5G14920.1		Gibberellin-regulated family protein
Glyma.04G247500.1	89.2697	67.9729	73.5153	106.237	78.2702	81.9942	72.4551	56.7487	43.0418	0.629678	0.207765	-0.421912	PF00646	PTHR12874,PTHR12874:SF4	KOG2997		K10295	GO:0005515	AT1G21760.1	ATFBP7,FBP7	F-box protein 7
Glyma.17G142800.1	68.9812	56.4845	54.0293	54.2735	48.6545	52.1781	84.3656	90.2398	87.877	-0.758966	-0.210689	0.548277	PF00551	PTHR10520:SF7,PTHR10520	KOG3076	3.5.1.10	K01433	GO:0016742,GO:0009058	AT5G47435.1		formyltetrahydrofolate deformylase, putative
Glyma.20G106400.1	41.5916	59.3566	46.0578	168.594	208.368	158.664	82.3805	60.47	91.4638	1.19278	1.86535	0.67257	PF00226,PF00076	PTHR24078:SF13,PTHR24078	KOG0691		K09537	GO:0003676	AT5G23590.1		DNAJ heat shock N-terminal domain-containing protein
Glyma.03G155300.1	127.818	66.0582	83.2582	40.4164	45.4813	39.3998	59.5522	66.0518	57.389	-0.54643	-1.14523	-0.598797	PF05910						AT5G28150.1		Plant protein of unknown function (DUF868)
Glyma.20G226500.1	100.428	130.202	147.031	324.486	312.023	351.404	184.612	187.922	198.172	0.791638	1.38729	0.595656	PF05030	PTHR23107					AT5G28640.1	AN3,ATGIF1,GIF,GIF1	SSXT family protein
Glyma.19G219300.1	99.414	82.3334	73.5153	95.8447	93.0781	97.967	46.6492	87.4489	60.0791	0.563123	0.168514	-0.394608	PF00543					GO:0030234,GO:0006808	AT4G01900.1	GLB1,PII	GLNB1 homolog
Glyma.07G052200.1	44.6349	21.062	32.7719	12.7023	5.28853	11.7135	16.8731	14.8849	12.5539	-0.577023	-1.729	-1.15197
Glyma.10G139800.1	1.01443	0.957365	0.885726	1.15475	1.05771	1.06486	0.992536	0.930307	0.896704	0.217053	0.197753	-0.0193	PF00190					GO:0045735	AT3G62020.1	GLP10	germin-like protein 10
Glyma.13G310300.1	65.9379	99.5659	62.8865	16.1666	7.40394	19.1675	20.8433	28.8395	17.0374	-0.642604	-2.41791	-1.77531	PF03552	PTHR13301,PTHR13301:SF23				GO:0016760,GO:0030244,GO:0016020	AT2G32530.1	ATCSLB03,ATCSLB3,CSLB03	cellulose synthase-like B3
Glyma.16G166500.1	94.3419	80.4186	88.5726	108.547	90.9627	87.3184	79.4029	58.6094	83.3934	0.373494	0.123297	-0.250197	PF00856	PTHR12197,PTHR12197:SF90	KOG2084			GO:0005515	AT1G43245.1		SET domain-containing protein
Glyma.08G108400.1	15.2164	22.0194	17.7145	5.77377	10.5771	7.45401	9.92536	25.1183	17.0374	-1.1295	-1.20687	-0.0773705	PF01535	PTHR24015					AT1G12700.1		ATP binding;nucleic acid binding;helicases
Glyma.02G239400.1	2.02886	2.87209	1.77145	16.1666	10.5771	6.38915	4.96268	3.72123	2.69011	1.54252	2.31198	0.769464	PF00501	PTHR24095,PTHR24095:SF26	KOG1176			GO:0003824,GO:0008152	AT5G16370.1	AAE5	acyl activating enzyme 5
Glyma.09G015700.1	25.3607	39.252	52.2578	32.3331	27.5003	26.6215	22.8283	24.188	22.4176	0.316308	-0.43489	-0.751199	PF00168,PF02893	PTHR16122:SF15,PTHR16122	KOG1032			GO:0005515	AT1G03370.1		C2 calcium/lipid-binding and GRAM domain containing protein
Glyma.10G258000.1	69.9956	62.2287	73.5153	75.0591	75.0971	106.486	27.791	34.4214	34.9714	1.40097	0.318939	-1.08203	PF00651,PF03000	PTHR13690:SF174,PTHR13690				GO:0005515	AT2G14820.1	NPY2	Phototropic-responsive NPH3 family protein
Glyma.02G216900.1	80.1399	111.054	118.687	113.166	110.001	113.94	113.149	87.4489	135.402	0.0047455	0.121491	0.116746	PF01535	PTHR24015					AT1G09900.1		Pentatricopeptide repeat (PPR-like) superfamily protein
Glyma.05G185600.1	71.01	42.124	55.8007	68.1305	65.5777	67.0861	80.3954	84.658	80.7033	-0.291512	0.249253	0.540764							AT3G52860.1
Glyma.13G057800.1	192.741	268.062	252.432	526.568	594.431	603.775	194.537	227.925	243.007	1.37396	1.27396	-0.100007	PF00343	PTHR11468	KOG2099	2.4.1.1	K00688	GO:0008184,GO:0005975	AT3G29320.1		Glycosyl transferase, family 35
Glyma.05G183800.1	250.564	239.341	277.232	272.522	378.659	283.253	362.276	275.371	326.4	-0.0450114	0.284607	0.329618	PF04414					GO:0016788,GO:0051499	AT2G03800.1	GEK1	D-aminoacyl-tRNA deacylases
Glyma.11G119700.1	37.5339	15.3178	20.3717	19.6308	23.2695	25.5566	23.8209	33.4911	17.9341	-0.136417	-0.0971072	0.0393102	PF03134	PTHR12300,PTHR12300:SF12					AT4G36720.1	HVA22K	HVA22-like protein K
Glyma.13G347700.1	10.1443	23.9341	15.0573	15.0118	15.8656	18.1026	23.8209	28.8395	28.6945	-0.732037	-0.00458021	0.727456	PF00305,PF01477	PTHR11771,PTHR11771:SF2				GO:0016702,GO:0046872,GO:0055114,GO:0005515	AT1G55020.1	ATLOX1,LOX1	lipoxygenase 1
Glyma.01G206200.1	126.804	142.647	147.031	113.166	97.3089	106.486	142.925	152.57	156.923	-0.513354	-0.393948	0.119406	PF01088	PTHR10589,PTHR10589:SF17	KOG1415	3.4.19.12	K05609	GO:0004221,GO:0006511,GO:0005622	AT4G17510.1	UCH3	ubiquitin C-terminal hydrolase 3
Glyma.17G012600.1	3.04329	2.87209	0.885726	1.15475	1.05771	1.06486	0.992536	0.930307	1.79341	-0.181331	-1.05325	-0.871922	PF01842,PF00800	PTHR21022	KOG2797			GO:0004664,GO:0009094,GO:0016597,GO:0008152	AT1G11790.1	ADT1	arogenate dehydratase 1
Glyma.01G178200.1	791.254	522.721	587.236	472.295	444.236	420.619	723.559	726.57	725.433	-0.702226	-0.507758	0.194469	PF00179	PTHR24067,PTHR24067:SF17	KOG0420	6.3.2.19	K10579	GO:0016881	AT4G36800.1	RCE1	RUB1 conjugating enzyme 1
Glyma.09G014200.1	64.9234	64.1434	69.9724	25.4046	51.8276	31.9458	78.4103	91.1701	67.2528	-1.11719	-0.866371	0.250819	PF00293	PTHR13994,PTHR13994:SF2	KOG0648			GO:0016787	AT5G47650.1	ATNUDT2,ATNUDX2,NUDT2	nudix hydrolase homolog 2
Glyma.01G219600.1	73.0389	61.2713	47.8292	53.1187	66.6355	67.0861	61.5372	84.658	71.7363	-0.222069	0.0367625	0.258831	PF03479						AT1G63470.1		AT hook motif DNA-binding family protein
Glyma.10G018500.1	78.111	55.5272	51.3721	35.7974	53.943	37.2701	82.3805	84.658	83.3934	-0.979471	-0.542658	0.436813	PF05347		KOG3801				AT3G62810.1		complex 1 family protein / LVR family protein
Glyma.04G248500.1	365.194	404.008	316.204	482.688	629.335	378.025	444.656	261.416	429.521	0.391912	0.457123	0.0652111	PF00171	PTHR11699,PTHR11699:SF15	KOG2456			GO:0016491,GO:0008152,GO:0055114	AT1G44170.1	ALDH3H1,ALDH4	aldehyde dehydrogenase 3H1
Glyma.07G003200.1	546.777	573.461	588.122	573.913	609.238	519.651	864.499	563.766	740.677	-0.34908	-0.0047012	0.344379	PF00069	PTHR24361:SF31,PTHR24361	KOG0581	2.7.12.2	K13413	GO:0004672,GO:0005524,GO:0006468	AT1G51660.1	ATMEK4,ATMKK4,MKK4	mitogen-activated protein kinase kinase 4
Glyma.01G237800.1	96.3707	67.9729	89.4583	53.1187	60.2892	53.243	112.157	78.1458	102.224	-0.811739	-0.606874	0.204865							AT4G14870.1		secE/sec61-gamma protein transport protein
Glyma.18G092800.1	3.04329	0.957365	1.77145	1.15475	1.05771	2.12972	2.97761	3.72123	0.896704	-0.806734	-0.410678	0.396056	PF05553
Glyma.20G005500.1	6.08657	5.74419	7.08581	9.23804	2.11541	12.7783	0.992536	0.930307	2.69011	2.38717	0.351283	-2.03589
Glyma.18G031400.1	1.01443	1.91473	2.65718	2.30951	4.23082	2.12972	0.992536	0.930307	0.896704	1.62058	0.634138	-0.986439	PF00139					GO:0030246	AT5G01090.1		Concanavalin A-like lectin family protein
Glyma.07G075500.1	273.896	228.81	273.689	581.996	450.583	462.149	358.305	361.89	303.983	0.545417	0.94502	0.399603	PF03061	PTHR21660	KOG3328				AT3G61200.1		Thioesterase superfamily protein
Glyma.15G117200.1	166.366	193.388	186.888	155.892	137.502	137.367	111.164	116.288	138.989	0.233303	-0.343711	-0.577014	PF01426,PF05641					GO:0003677	AT5G55600.1		agenet domain-containing protein / bromo-adjacent homology (BAH) domain-containing protein
Glyma.18G257500.1	3.04329	2.87209	0.885726	1.15475	1.05771	1.06486	0.992536	0.930307	1.79341	-0.181331	-1.05325	-0.871922		PTHR11274					AT5G41370.1	ATXPB1,XPB1	homolog of xeroderma pigmentosum complementation group B 1
Glyma.10G014100.1	8.11543	4.78682	1.77145	39.2617	38.0774	41.5295	8.93282	3.72123	5.38022	2.72055	3.01806	0.297508	PF00533,PF00628	PTHR13561:SF5,PTHR13561				GO:0005515	AT4G02110.1		transcription coactivators
Glyma.08G201900.1	127.818	134.988	122.23	75.0591	105.771	78.7996	152.851	123.731	140.782	-0.684853	-0.568543	0.11631	PF08670,PF01852,PF00046	PTHR24326,PTHR24326:SF218	KOG0483		K09338	GO:0003700,GO:0043565,GO:0006355	AT1G52150.1	ATHB-15,ATHB15,CNA,ICU4	Homeobox-leucine zipper family protein / lipid-binding START domain-containing protein
Glyma.03G244600.1	382.44	435.601	356.948	367.212	319.427	274.734	211.41	125.591	200.862	0.837856	-0.289478	-1.12733	PF02458					GO:0016747	AT5G17540.1		HXXXD-type acyl-transferase family protein
Glyma.06G087200.1	38.5483	21.062	31.0004	19.6308	32.7889	29.8161	40.694	41.8638	28.6945	-0.435998	-0.139916	0.296082	PF10604						AT4G32870.1		Polyketide cyclase/dehydrase and lipid transport superfamily protein
Glyma.19G133800.1	387.512	358.054	390.605	295.617	261.253	211.907	425.798	446.548	399.93	-0.726773	-0.563542	0.16323							AT2G41430.1	CID1,ERD15,LSR1	dehydration-induced protein (ERD15)
Glyma.10G278000.1	3904.54	4808.84	5507.44	2423.83	3413.22	4425.55	1036.21	2994.66	1590.75	0.868339	-0.470609	-1.33895	PF00487	PTHR19353				GO:0006629	AT3G12120.1	FAD2	fatty acid desaturase 2
Glyma.13G167300.1	131.876	66.0582	72.6295	49.6545	57.1161	28.7512	81.3879	78.1458	70.8396	-0.765449	-0.997442	-0.231993	PF11317
Glyma.06G062700.1	69.9956	77.5465	62.8865	176.677	181.925	193.804	98.2611	72.564	97.7407	1.04046	1.3924	0.351944		PTHR12663					AT4G31880.1
Glyma.04G156700.1	3.04329	9.57365	4.42863	1.15475	7.40394	6.38915	6.94775	15.8152	17.9341	-1.44499	-0.189458	1.25553	PF03088	PTHR10426:SF5,PTHR10426	KOG1520			GO:0016844,GO:0009058	AT1G74000.1	SS3	strictosidine synthase 3
Glyma.01G127300.1	1.01443	0.957365	0.885726	1.15475	1.05771	1.06486	0.992536	0.930307	0.896704	0.217053	0.197753	-0.0193							AT1G29810.1		Transcriptional coactivator/pterin dehydratase
Glyma.04G064500.1	6.08657	7.65892	5.31436	2.30951	4.23082	1.06486	3.97014	2.79092	1.79341	-0.169694	-1.32548	-1.15579							AT2G25270.1
Glyma.20G090900.1	12.1731	17.2326	15.0573	12.7023	9.51935	10.6486	9.92536	27.9092	21.5209	-0.852599	-0.435825	0.416774	PF05184,PF00026	PTHR13683,PTHR13683:SF85				GO:0004190,GO:0006508,GO:0006629	AT1G11910.1	APA1,ATAPA1	aspartic proteinase A1
Glyma.14G133600.1	105.501	118.713	74.401	42.7259	37.0197	42.5944	96.276	108.846	97.7407	-1.30777	-1.28739	0.020378	PF03109	PTHR10566,PTHR10566:SF10	KOG1235				AT4G31390.1		Protein kinase superfamily protein
Glyma.15G100000.1	3.04329	0.957365	2.65718	1.15475	1.05771	2.12972	1.98507	2.79092	2.69011	-0.781937	-0.616633	0.165304
Glyma.03G257600.1	119.703	108.182	130.202	122.404	89.905	91.5779	59.5522	40.9335	21.5209	1.31658	-0.236774	-1.55335	PF00240,PF00454	PTHR15245,PTHR15245:SF11	KOG2381			GO:0005515,GO:0016773	AT2G46500.1	ATPI4K GAMMA 4,PI4K GAMMA 4,UBDK GAMMA 4	phosphoinositide 4-kinase gamma 4
Glyma.19G179100.1	10.1443	6.70155	15.0573	19.6308	9.51935	20.2323	8.93282	13.0243	4.48352	0.901243	0.6303	-0.270943	PF03360	PTHR10896,PTHR10896:SF1	KOG1476			GO:0015018,GO:0016020	AT2G37090.1	IRX9	Nucleotide-diphospho-sugar transferases superfamily protein
Glyma.13G276600.1	36.5194	21.062	32.7719	65.821	65.5777	58.5673	26.7985	35.3517	52.0088	0.734697	1.07209	0.337395	PF02485	PTHR19297,PTHR19297:SF2	KOG0799			GO:0008375,GO:0016020	AT3G15350.1		Core-2/I-branching beta-1,6-N-acetylglucosaminyltransferase family protein
Glyma.16G189700.1	3.04329	7.65892	2.65718	6.92853	2.11541	8.51887	8.93282	11.1637	7.17363	-0.634798	0.394671	1.02947			KOG0978				AT5G52280.1		Myosin heavy chain-related protein
Glyma.11G000300.1	87.2409	135.946	143.488	80.8328	100.482	95.8373	124.067	142.337	154.233	-0.601898	-0.403821	0.198077	PF00850	PTHR10625:SF28,PTHR10625	KOG1342	3.5.1.98	K06067		AT4G38130.1	ATHD1,ATHDA19,HD1,HDA1,HDA19,RPD3A	histone deacetylase 1
Glyma.01G223100.1	17.2453	12.4457	20.3717	28.8689	27.5003	27.6863	24.8134	17.6758	25.1077	0.314385	0.747606	0.433221	PF00004	PTHR23074,PTHR23074:SF20	KOG0737			GO:0005524,GO:0009378,GO:0006281,GO:0006310	AT1G64110.2		P-loop containing nucleoside triphosphate hydrolases superfamily protein
Glyma.13G181600.1	27.3896	38.2946	27.4575	69.2853	84.6164	57.5024	40.694	32.5608	35.8681	0.95405	1.1825	0.228455	PF01535	PTHR24015,PTHR24015:SF35					AT5G14770.1		Tetratricopeptide repeat (TPR)-like superfamily protein
Glyma.12G050300.1	9.12986	2.87209	3.5429	8.08328	2.11541	5.3243	0.992536	2.79092	6.27693	0.625721	-0.00203083	-0.627752	PF12579	PTHR14000,PTHR14000:SF1					AT3G07565.1		Protein of unknown function (DUF3755)
Glyma.10G008500.1	42.606	22.9768	34.5433	12.7023	14.8079	17.0377	40.694	40.9335	22.4176	-1.22378	-1.16839	0.0553911	PF00072	PTHR24423				GO:0000156,GO:0000160,GO:0006355	AT3G04580.1	EIN4	Signal transduction histidine kinase, hybrid-type, ethylene sensor
Glyma.11G188500.1	16.2309	6.70155	9.74299	5.77377	8.46164	4.25944	17.8656	6.51215	1.79341	-0.500856	-0.821081	-0.320225							AT3G44716.1
Glyma.13G278000.1	3902.51	2397.24	3201.01	15540.7	13134.6	9941.52	4503.14	2389.96	4776.74	1.72644	2.02311	0.296669	PF00304					GO:0006952	AT1G61070.1	LCR66,PDF2.4	low-molecular-weight cysteine-rich 66
Glyma.17G115300.1	9.12986	14.3605	10.6287	23.0951	12.6925	10.6486	9.92536	16.7455	8.96704	0.381835	0.444671	0.0628363	PF00854	PTHR11654:SF37,PTHR11654	KOG1237			GO:0005215,GO:0006810,GO:0016020	AT2G26690.1		Major facilitator superfamily protein
Glyma.15G060900.1	53.7647	41.1667	52.2578	30.0236	47.5968	37.2701	95.2834	62.3306	78.0132	-1.03625	-0.357413	0.678834							AT5G64480.1
Glyma.15G101100.1	100.428	85.2055	87.6869	150.118	137.502	154.405	91.3133	53.9578	31.3846	1.32319	0.693531	-0.629654		PTHR23125,PTHR23125:SF67	KOG4341				AT4G15475.1		F-box/RNI-like superfamily protein
Glyma.10G229400.1	14.202	10.531	1.77145	8.08328	10.5771	8.51887	1.98507	0.930307	5.38022	1.71209	0.0362682	-1.67582	PF00004	PTHR23074,PTHR23074:SF20	KOG0737			GO:0005524,GO:0009378,GO:0006281,GO:0006310	AT5G52882.1		P-loop containing nucleoside triphosphate hydrolases superfamily protein
Glyma.03G025500.1	419.973	449.004	457.92	408.783	481.256	439.787	436.716	363.75	416.967	0.127395	0.00318017	-0.124215	PF01529	PTHR22883	KOG1315			GO:0008270	AT3G60800.1		DHHC-type zinc finger family protein
Glyma.14G113600.1	4.05771	2.87209	5.31436	3.46426	3.17312	4.25944	2.97761	4.65154	2.69011	0.078568	-0.168188	-0.246756	PF00036	PTHR12294:SF1,PTHR12294	KOG0027			GO:0005509	AT4G32060.1		calcium-binding EF hand family protein
Glyma.15G202000.1	1217.31	2315.87	1947.71	1547.37	1625.69	1878.41	1833.21	1700.6	1986.2	-0.127967	-0.117705	0.0102615	PF07714,PF00564	PTHR23257,PTHR23257:SF393	KOG0192			GO:0004672,GO:0005524,GO:0006468,GO:0005515	AT3G46920.1		Protein kinase superfamily protein with octicosapeptide/Phox/Bem1p domain
Glyma.18G208300.1	28.404	25.8488	38.9719	20.7856	29.6158	27.6863	70.4701	125.591	109.398	-1.96781	-0.255619	1.71219	PF00201	PTHR11926:SF15,PTHR11926	KOG1192			GO:0016758,GO:0008152	AT2G15480.2	UGT73B5	UDP-glucosyl transferase 73B5
Glyma.13G032400.1	111.587	183.814	138.173	240.189	186.156	220.426	66.4999	64.1912	62.7693	1.74122	0.576975	-1.16424	PF01513	PTHR20275	KOG2178			GO:0003951,GO:0006741,GO:0008152	AT1G21640.1	ATNADK2,NADK2	NAD kinase 2
Glyma.02G129000.1	65.9379	38.2946	31.8861	45.0354	41.2505	40.4646	25.8059	29.7698	37.6616	0.443013	-0.102872	-0.545885		PTHR10997,PTHR10997:SF9					AT1G26170.1		ARM repeat superfamily protein
Glyma.15G002200.1	17.2453	25.8488	13.2859	2.30951	5.28853	6.38915	9.92536	46.5154	13.4506	-2.32101	-2.01108	0.309928	PF00067	PTHR24279,PTHR24279:SF30	KOG0156			GO:0005506,GO:0009055,GO:0016705,GO:0020037,GO:0055114	AT5G25900.1	ATKO1,CYP701A3,GA3	GA requiring 3
Glyma.14G189400.1	3478.48	3184.2	3406.5	6587.88	4798.81	4558.66	3428.22	3171.42	3281.94	0.690323	0.66319	-0.0271328	PF00274	PTHR11627	KOG1557	4.1.2.13	K01623	GO:0004332,GO:0006096	AT2G36460.1		Aldolase superfamily protein
Glyma.06G199800.1	222.16	114.884	104.516	159.356	151.252	148.015	167.739	170.246	185.618	-0.191162	0.0547029	0.245865	PF01844,PF00271	PTHR10799,PTHR10799:SF43				GO:0003676,GO:0004386,GO:0005524,GO:0004519	AT5G07810.1		SNF2 domain-containing protein / helicase domain-containing protein / HNH endonuclease domain-containing protein
Glyma.04G141800.1	189.698	280.508	232.946	170.904	157.598	148.015	113.149	87.4489	115.675	0.591359	-0.561308	-1.15267	PF00462	PTHR10168:SF44,PTHR10168	KOG2824			GO:0009055,GO:0015035,GO:0045454	AT5G13810.1		Glutaredoxin family protein
Glyma.08G100600.1	19.2741	14.3605	12.4002	15.0118	23.2695	18.1026	13.8955	24.188	11.6571	0.180859	0.29256	0.111701							AT5G19480.1
Glyma.15G201300.1	77.0966	67.9729	86.8012	122.404	85.6742	130.978	63.5223	62.3306	68.1495	0.805449	0.548203	-0.257246	PF00481	PTHR13832,PTHR13832:SF92	KOG0698			GO:0003824	AT2G25620.1	AtDBP1,DBP1	DNA-binding protein phosphatase 1
Glyma.17G227100.1	60.8657	27.7636	24.8003	9.23804	7.40394	5.3243	8.93282	16.7455	8.96704	-0.657373	-2.36844	-1.71106	PF05653		KOG2922			GO:0015095,GO:0015693,GO:0016020	AT5G11960.1		Protein of unknown function (DUF803)
Glyma.08G110400.1	23.3319	22.0194	25.6861	2.30951	15.8656	30.8809	71.4626	39.0729	63.666	-1.82825	-0.534147	1.29411	PF00195,PF02797	PTHR11877,PTHR11877:SF9				GO:0016746,GO:0009058,GO:0016747,GO:0006633,GO:0016020,GO:0008610,GO:0004315	AT5G13930.1	ATCHS,CHS,TT4	Chalcone and stilbene synthase family protein
Glyma.07G081200.1	17.2453	44.0388	41.6291	60.0473	64.52	75.605	9.92536	11.1637	20.6242	2.26267	0.959814	-1.30285	PF05615	PTHR14854	KOG3215				AT5G16790.1	AtTHO7,THO7	Tho complex subunit 7/Mft1p
Glyma.15G208600.1	22.3174	20.1047	21.2574	12.7023	24.3272	34.0755	57.5671	69.7731	59.1824	-1.39133	0.159122	1.55045	PF03547					GO:0055085,GO:0016021	AT5G57090.1	AGR,AGR1,ATPIN2,EIR1,PIN2,WAV6	Auxin efflux carrier family protein
Glyma.20G079700.1	1.01443	5.74419	2.65718	9.23804	3.17312	10.6486	0.992536	8.37277	2.69011	0.935696	1.29222	0.356526
Glyma.10G233800.1	3.04329	1.91473	5.31436	1.15475	1.05771	1.06486	2.97761	5.58184	0.896704	-1.52874	-1.64818	-0.119444	PF00856	PTHR22884,PTHR22884:SF117				GO:0005515	AT3G03750.2	SDG20,SUVR3	SET domain protein 20
Glyma.04G163000.1	151.15	64.1434	114.259	200.927	204.137	152.275	70.4701	70.7034	66.3561	1.42524	0.75805	-0.66719	PF00153	PTHR24089:SF45,PTHR24089	KOG0770				AT1G74240.1		Mitochondrial substrate carrier family protein
Glyma.05G145900.1	65.9379	51.6977	72.6295	62.3568	77.2125	75.605	83.373	72.564	100.431	-0.25271	0.177495	0.430204	PF12056						AT1G67570.1		Protein of unknown function (DUF3537)
Glyma.07G252700.1	307.372	335.078	309.118	718.258	695.97	510.068	448.626	389.799	371.235	0.669728	1.01595	0.346223	PF00076	PTHR23147	KOG4207			GO:0003676	AT5G18810.1	SCL28	SC35-like splicing factor 28
Glyma.07G156900.1	1.01443	2.87209	3.5429	2.30951	9.51935	10.6486	150.865	121.87	124.642	-4.14396	1.59716	5.74112	PF03030					GO:0004427,GO:0009678,GO:0015992,GO:0016020	AT1G68370.1	ARG1	Chaperone DnaJ-domain superfamily protein
Glyma.02G153400.1	6.08657	1.91473	0.885726	1.15475	2.11541	8.51887	1.98507	2.79092	3.58681	0.495387	0.407673	-0.0877135
Glyma.07G058200.1	166.366	165.624	175.374	121.249	97.3089	138.432	28.7835	58.6094	38.5583	1.50302	-0.507139	-2.01016	PF00400,PF00069	PTHR22847:SF121,PTHR22847	KOG1033			GO:0004672,GO:0005524,GO:0006468,GO:0005515	AT2G46340.1	SPA1	SPA (suppressor of phyA-105) protein family
Glyma.02G291800.1	145.063	182.857	186.888	285.224	224.234	221.491	124.067	120.01	135.402	0.945751	0.505735	-0.440015		PTHR23125:SF145,PTHR23125					AT4G26980.1		RNI-like superfamily protein
Glyma.17G144200.1	6.08657	0.957365	0.885726	2.30951	3.17312	1.06486	4.96268	2.79092	3.58681	-0.792461	-0.276319	0.516142
Glyma.10G068700.1	3.04329	4.78682	8.85726	9.23804	19.0387	12.7783	12.903	6.51215	10.7604	0.444179	1.2988	0.854624	PF07047	PTHR12499	KOG3335				AT1G28510.1		Optic atrophy 3 protein (OPA3)
Glyma.10G174700.1	46.6637	30.6357	35.429	18.4761	28.5581	39.3998	41.6865	31.6304	29.5912	-0.251688	-0.383182	-0.131494	PF10296	PTHR13466	KOG2238				AT1G17820.1		Putative integral membrane protein conserved region (DUF2404)
Glyma.05G169500.1	54.7792	38.2946	26.5718	24.2499	25.3849	22.362	37.7164	54.8881	41.2484	-0.894643	-0.732761	0.161882	PF01105	PTHR22811:SF5,PTHR22811	KOG1691			GO:0006810,GO:0016021	AT1G09580.1		emp24/gp25L/p24 family/GOLD family protein
Glyma.10G145100.1	1448.6	1368.07	1464.99	6620.21	5365.74	5002.71	1578.13	1509.89	1398.86	1.92079	1.98833	0.0675388	PF00025	PTHR11711	KOG0070		K07977	GO:0005525,GO:0007264,GO:0005634,GO:0005737,GO:0005622	AT1G10630.1	ARFA1F,ATARFA1F	ADP-ribosylation factor A1F
Glyma.16G209000.1	7.101	1.91473	1.77145	11.5475	12.6925	17.0377	0.992536	2.79092	1.79341	2.88784	1.93605	-0.951792	PF01582	PTHR23155,PTHR23155:SF300				GO:0005515,GO:0007165	AT5G36930.2		Disease resistance protein (TIR-NBS-LRR class) family
Glyma.17G142400.1	5.07214	8.61628	9.74299	5.77377	7.40394	3.19458	5.95522	2.79092	4.48352	0.307481	-0.517188	-0.824668	PF00892					GO:0016020	AT5G47470.1		Nodulin MtN21 /EamA-like transporter family protein
Glyma.02G050200.1	90.2842	88.0776	100.087	76.2138	96.2512	91.5779	119.104	105.125	104.018	-0.314008	-0.0766394	0.237369	PF00137	PTHR10263	KOG0232	3.6.3.14	K02155	GO:0015078,GO:0015991,GO:0033177	AT4G34720.1	ATVHA-C1,AVA-P1,VHA-C1	ATPase, F0/V0 complex, subunit C protein
Glyma.03G211800.1	6.08657	18.1899	27.4575	47.3449	55.0007	56.4375	33.7462	37.2123	25.1077	0.724957	1.61787	0.892916							AT2G47820.1
Glyma.18G177100.1	9.12986	3.82946	7.97153	4.61902	13.7502	4.25944	1.98507	7.44246	6.27693	0.526975	0.112518	-0.414457							AT1G71110.1
Glyma.20G126600.1	197.814	248.915	240.032	301.391	255.965	341.82	319.597	308.862	327.297	-0.0880387	0.388796	0.476835	PF10409	PTHR12305,PTHR12305:SF8	KOG2283	3.1.3.67	K01110	GO:0005515	AT3G19420.1	ATPEN2,PEN2	PTEN 2
Glyma.13G082800.1	55.7936	26.8062	31.0004	40.4164	17.981	30.8809	52.6044	38.1426	30.4879	-0.441424	-0.347584	0.09384	PF03671	PTHR15825					AT1G77710.1
Glyma.08G360600.1	300.271	232.64	222.317	230.951	270.773	266.215	336.47	291.186	310.259	-0.288467	0.0240787	0.312546	PF00069	PTHR24420,PTHR24420:SF657	KOG1187	2.7.11.1	K13430	GO:0004672,GO:0005524,GO:0006468	AT5G13160.1	PBS1	Protein kinase superfamily protein
Glyma.02G257100.1	1.01443	2.87209	0.885726	2.30951	5.28853	2.12972	0.992536	0.930307	1.79341	1.38826	1.02744	-0.360821	PF00388,PF00387,PF00168,PF09279	PTHR10336,PTHR10336:SF35	KOG0169			GO:0005515,GO:0004435,GO:0006629,GO:0007165,GO:0035556	AT2G40116.1		Phosphoinositide-specific phospholipase C family protein
Glyma.10G198500.1	137.962	86.1628	97.4299	138.571	151.252	144.821	260.044	257.695	239.42	-0.800765	0.434766	1.23553	PF00125	PTHR23428	KOG1744		K11252	GO:0003677	AT2G37470.1		Histone superfamily protein
Glyma.02G296800.1	29.4184	44.9961	21.2574	26.5594	44.4236	30.8809	22.8283	25.1183	18.8308	0.609211	0.0904743	-0.518737	PF06548,PF00225	PTHR24115:SF202,PTHR24115	KOG4280			GO:0003777,GO:0005524,GO:0008017,GO:0007018	AT3G20150.1		Kinesin motor family protein
Glyma.18G221700.1	130.861	167.539	151.459	115.475	154.425	94.7725	91.3133	151.64	106.708	0.0606458	-0.302871	-0.363516	PF00701	PTHR12128		4.2.1.52	K01714	GO:0016829,GO:0008152	AT2G45440.1	DHDPS2	dihydrodipicolinate synthase
Glyma.02G139200.1	1.01443	0.957365	0.885726	1.15475	1.05771	1.06486	2.97761	0.930307	0.896704	-0.551906	0.197753	0.749659							AT1G25540.2	PFT1	phytochrome and flowering time regulatory protein (PFT1)
Glyma.06G235200.1	85.212	74.6744	69.9724	79.6781	51.8276	67.0861	69.4775	89.3095	64.5627	-0.169498	-0.210942	-0.0414438	PF00046					GO:0003700,GO:0043565,GO:0006355	AT3G18380.1		sequence-specific DNA binding transcription factors;sequence-specific DNA binding
Glyma.12G044600.1	6.08657	6.70155	5.31436	81.9876	50.7699	70.2807	22.8283	12.094	6.27693	2.30106	3.48749	1.18643	PF03181						AT1G49320.1	ATUSPL1,USPL1	unknown seed protein like 1
Glyma.07G102400.1	30.4329	12.4457	21.2574	53.1187	44.4236	43.6592	51.6119	35.3517	34.9714	0.211644	1.13855	0.926905	PF00168	PTHR26357:SF5,PTHR26357	KOG1030			GO:0005515	AT3G17980.1		Calcium-dependent lipid-binding (CaLB domain) family protein
Glyma.13G369300.1	1.01443	0.957365	2.65718	2.30951	9.51935	4.25944	0.992536	0.930307	0.896704	2.51248	1.79725	-0.715228	PF00702,PF00122,PF00690	PTHR24093,PTHR24093:SF61	KOG0205	3.6.3.6	K01535	GO:0000166,GO:0046872	AT1G80660.1	AHA9,HA9	H(+)-ATPase 9
Glyma.19G113400.1	110.573	192.43	122.23	639.734	487.602	671.926	362.276	281.883	199.068	1.09341	2.08108	0.987667
Glyma.20G186500.1	2.02886	0.957365	0.885726	8.08328	1.05771	3.19458	1.98507	0.930307	0.896704	1.69417	1.67169	-0.0224802	PF00249					GO:0003682	AT1G25550.1		myb-like transcription factor family protein
Glyma.08G341200.1	29.4184	22.0194	28.3432	31.1784	24.3272	12.7783	1.98507	6.51215	9.86374	1.8949	-0.2245	-2.1194							AT3G03060.1		P-loop containing nucleoside triphosphate hydrolases superfamily protein
Glyma.07G180000.1	128.832	90.9497	94.7727	79.6781	67.6932	94.7725	169.724	160.013	169.477	-1.04379	-0.377448	0.666346							AT2G15860.1
Glyma.20G149700.1	22.3174	19.1473	21.2574	47.3449	27.5003	18.1026	45.6567	30.7001	10.7604	0.093464	0.567447	0.473983	PF00097					GO:0046872,GO:0008270,GO:0005515	AT2G15580.1		RING/U-box superfamily protein
Glyma.13G354300.1	28.404	37.3372	28.3432	34.6426	29.6158	21.2972	26.7985	14.8849	19.7275	0.478368	-0.137094	-0.615462	PF01535	PTHR24015,PTHR24015:SF20					AT5G65820.1		Pentatricopeptide repeat (PPR) superfamily protein
Glyma.07G011100.1	119.703	157.008	126.659	124.714	100.482	109.68	103.224	102.334	161.407	-0.132012	-0.268474	-0.136462	PF00076	PTHR12742	KOG1457			GO:0003676	AT3G13700.2		RNA-binding (RRM/RBD/RNP motifs) family protein
Glyma.18G124500.1	19.2741	8.61628	5.31436	4.61902	2.11541	1.06486	15.8806	28.8395	8.07033	-2.75886	-2.08998	0.668885	PF00560,PF00069	PTHR24420,PTHR24420:SF465	KOG1187			GO:0004672,GO:0005524,GO:0006468,GO:0005515	AT1G14390.1		Leucine-rich repeat protein kinase family protein
Glyma.07G267000.1	47.6782	26.8062	39.8577	33.4879	20.0964	39.3998	35.7313	46.5154	29.5912	-0.266353	-0.2983	-0.0319469	PF00067	PTHR25943:SF170,PTHR25943	KOG0156			GO:0005506,GO:0009055,GO:0016705,GO:0020037,GO:0055114	AT5G25120.1	CYP71B11	ytochrome p450, family 71, subfamily B, polypeptide 11
Glyma.02G297900.1	40.5771	36.3799	45.172	38.1069	25.3849	14.908	16.8731	35.3517	20.6242	0.105943	-0.639483	-0.745426	PF02536	PTHR13068,PTHR13068:SF3					AT5G55580.1		Mitochondrial transcription termination factor family protein
Glyma.02G201400.1	464.608	511.233	475.635	474.604	410.39	481.316	564.753	688.427	569.407	-0.415703	-0.0872355	0.328467	PF00787,PF09325	PTHR10555:SF65,PTHR10555	KOG2273			GO:0005515,GO:0035091,GO:0007154	AT5G06140.1	ATSNX1,SNX1	sorting nexin 1
Glyma.08G164300.1	1.01443	1.91473	1.77145	1.15475	1.05771	1.06486	0.992536	3.72123	0.896704	-0.775605	-0.520332	0.255273
Glyma.05G209600.1	335.776	234.554	229.403	144.344	162.887	156.534	354.335	404.684	332.677	-1.2351	-0.786124	0.44898	PF00097	PTHR22937:SF23,PTHR22937				GO:0046872,GO:0008270,GO:0004842,GO:0005680,GO:0005515	AT5G41350.1		RING/U-box superfamily protein
Glyma.08G224700.1	2.02886	3.82946	4.42863	30.0236	26.4426	19.1675	27.791	12.094	16.1407	0.432942	2.87821	2.44527							AT3G20270.1		lipid-binding serum glycoprotein family protein
Glyma.09G058500.1	19.2741	14.3605	24.8003	26.5594	22.2118	11.7135	21.8358	23.2577	20.6242	-0.119713	0.0497371	0.16945							AT2G34320.1		Polynucleotidyl transferase, ribonuclease H-like superfamily protein
Glyma.20G087000.1	28.404	44.0388	44.2863	26.5594	55.0007	30.8809	26.7985	33.4911	22.4176	0.443084	-0.0539963	-0.497081	PF01590,PF00512,PF00072	PTHR24423				GO:0000156,GO:0000160,GO:0006355,GO:0000155,GO:0007165,GO:0016020,GO:0005515	AT3G23150.1	ETR2	Signal transduction histidine kinase, hybrid-type, ethylene sensor
Glyma.20G161100.1	1541.93	1466.68	1370.22	2407.66	1547.42	1973.18	758.297	786.11	682.392	1.41264	0.437065	-0.975575							AT5G52420.1
Glyma.11G209000.1	95.3563	122.543	122.23	69.2853	94.1358	81.9942	212.403	178.619	184.721	-1.2302	-0.470858	0.759341	PF00069	PTHR24352,PTHR24352:SF88	KOG0610			GO:0004672,GO:0005524,GO:0006468	AT3G52890.1	KIPK	KCBP-interacting protein kinase
Glyma.09G157400.1	46.6637	52.6551	43.4006	27.7141	34.9043	26.6215	32.7537	40.9335	27.7978	-0.185506	-0.677421	-0.491914	PF01535	PTHR24015					AT2G40240.1		Tetratricopeptide repeat (TPR)-like superfamily protein
Glyma.13G087800.1	2.02886	2.87209	3.5429	1.15475	1.05771	1.06486	0.992536	0.930307	1.79341	-0.181331	-1.36539	-1.18405	PF00300	PTHR11931	KOG0235				AT1G22170.1		Phosphoglycerate mutase family protein
Glyma.02G103600.1	1572.36	1863.03	1846.74	1861.46	2304.74	1685.67	2433.7	1920.15	2324.26	-0.19054	0.147778	0.338318	PF00380	PTHR21569	KOG1753		K02960	GO:0003735,GO:0006412,GO:0005840	AT5G18380.1		Ribosomal protein S5 domain 2-like superfamily protein
Glyma.06G248900.1	624.888	635.69	796.268	1655.92	1455.4	1393.9	569.716	427.011	499.464	1.5903	1.13116	-0.45914	PF02365					GO:0003677,GO:0006355	AT4G27410.2	ANAC072,RD26	NAC (No Apical Meristem) domain transcriptional regulator superfamily protein
Glyma.17G007400.1	27.3896	35.4225	28.3432	72.7496	62.4046	60.697	18.8582	26.0486	19.7275	1.59939	1.10336	-0.496027	PF07983,PF04535	PTHR11615,PTHR11615:SF57					AT2G35760.1		Uncharacterised protein family (UPF0497)
Glyma.14G006800.1	63.909	58.3992	61.1151	32.3331	35.962	64.9564	67.4924	89.3095	75.3231	-0.80075	-0.461025	0.339725	PF03106					GO:0003700,GO:0043565,GO:0006355	AT2G04880.2	ATWRKY1,WRKY1,ZAP1	zinc-dependent activator protein-1
Glyma.01G056400.1	1.01443	0.957365	2.65718	1.15475	1.05771	1.06486	2.97761	2.79092	0.896704	-1.02414	-0.498175	0.525964							AT1G26600.1	CLE9	CLAVATA3/ESR-RELATED 9
Glyma.16G019700.1	44.6349	31.593	25.6861	13.8571	32.7889	28.7512	87.3432	107.916	86.9803	-1.90434	-0.43477	1.46957	PF00612	PTHR13140,PTHR13140:SF84				GO:0005515	AT4G00820.1	iqd17	IQ-domain 17
Glyma.18G192800.1	55.7936	41.1667	51.3721	45.0354	51.8276	56.4375	41.6865	26.0486	36.7649	0.55286	0.0475293	-0.505331		PTHR21290:SF1,PTHR21290	KOG3058				AT3G54020.1	AtIPCS1	Arabidopsis Inositol phosphorylceramide synthase 1
Glyma.16G194400.1	26.3751	15.3178	15.0573	3.46426	10.5771	19.1675	17.8656	51.1669	19.7275	-1.41835	-0.773064	0.645282	PF01429					GO:0003677,GO:0005634	AT5G52230.1	MBD13	methyl-CPG-binding domain protein 13
Glyma.04G231900.1	163.323	215.407	178.917	56.583	44.4236	91.5779	115.134	201.877	150.646	-1.27996	-1.53386	-0.2539	PF03169					GO:0055085	AT5G53550.1	ATYSL3,YSL3	YELLOW STRIPE like 3
Glyma.17G261100.1	43.6204	39.252	54.0293	77.3686	60.2892	63.8915	50.6193	46.5154	38.5583	0.570787	0.557993	-0.0127943	PF05347						AT1G76060.1	EMB1793	LYR family of Fe/S cluster biogenesis protein
Glyma.19G044200.1	223.174	194.345	200.174	120.095	129.04	122.459	153.843	189.783	168.58	-0.463	-0.733166	-0.270167	PF03188	PTHR10106	KOG1619		K08360	GO:0016021	AT5G38630.1	ACYB-1,CYB-1	cytochrome B561-1
Glyma.08G120700.1	131.876	113.926	122.23	92.3804	65.5777	66.0213	120.097	228.856	95.0506	-0.987204	-0.716466	0.270737	PF00657	PTHR22835:SF39,PTHR22835				GO:0016788,GO:0006629	AT5G45670.1		GDSL-like Lipase/Acylhydrolase superfamily protein
Glyma.15G053500.1	103.472	97.6512	92.1155	135.106	131.155	130.978	73.4477	67.9124	83.3934	0.821665	0.437935	-0.38373	PF00403	PTHR24093,PTHR24093:SF150				GO:0046872,GO:0030001	AT4G33520.3	HMA6,PAA1	P-type ATP-ase 1
Glyma.01G234700.1	342.877	482.512	418.063	367.212	367.024	384.414	320.589	292.117	340.747	0.230525	-0.152591	-0.383116		PTHR19308	KOG2761				AT4G14500.1		Polyketide cyclase/dehydrase and lipid transport superfamily protein
Glyma.14G007900.1	3.04329	2.87209	2.65718	1.15475	2.11541	2.12972	3.97014	1.86061	3.58681	-0.802427	-0.666797	0.135629	PF03876	PTHR12709	KOG3298			GO:0003899,GO:0006351	AT5G59180.1	NRPB7	DNA-directed RNA polymerase II
Glyma.16G169500.1	2.02886	1.91473	7.97153	1.15475	1.05771	1.06486	5.95522	0.930307	1.79341	-1.405	-1.86221	-0.457205	PF00560	PTHR24420,PTHR24420:SF473	KOG0472			GO:0005515	AT3G05650.1	AtRLP32,RLP32	receptor like protein 32
Glyma.18G048300.1	7.101	10.531	5.31436	228.641	195.676	154.405	89.3282	93.961	86.0836	1.10327	4.65653	3.55327	PF03171	PTHR10209,PTHR10209:SF55	KOG0143			GO:0016491,GO:0016706,GO:0055114	AT4G16330.2		2-oxoglutarate (2OG) and Fe(II)-dependent oxygenase superfamily protein
Glyma.20G170900.1	5.07214	11.4884	10.6287	5.77377	10.5771	9.58373	5.95522	8.37277	1.79341	0.6859	-0.0681594	-0.754059	PF00069,PF00560,PF08263	PTHR24420:SF819,PTHR24420	KOG1187			GO:0004672,GO:0005524,GO:0006468,GO:0005515	AT1G34110.1		Leucine-rich receptor-like protein kinase family protein
Glyma.14G001300.1	204.915	273.806	256.861	312.939	300.388	301.355	526.044	388.868	429.521	-0.555656	0.314385	0.870041	PF07714	PTHR24420:SF531,PTHR24420	KOG1187			GO:0004672,GO:0005524,GO:0006468	AT2G17220.2		Protein kinase superfamily protein
Glyma.11G106100.1	3.04329	5.74419	0.885726	5.77377	2.11541	3.19458	1.98507	0.930307	0.896704	1.5398	0.196382	-1.34341	PF00314						AT4G38670.1		Pathogenesis-related thaumatin superfamily protein
Glyma.11G004200.1	78.111	75.6318	85.0297	95.8447	88.8473	67.0861	207.44	166.525	199.965	-1.18872	0.0765156	1.26524	PF07859	PTHR23024:SF10,PTHR23024	KOG1515			GO:0016787,GO:0008152	AT1G47480.1		alpha/beta-Hydrolases superfamily protein
Glyma.03G097300.1	17.2453	21.062	24.8003	13.8571	7.40394	7.45401	24.8134	35.3517	21.5209	-1.50828	-1.13601	0.372274	PF00561	PTHR10992,PTHR10992:SF24	KOG4178				AT4G12830.1		alpha/beta-Hydrolases superfamily protein
Glyma.06G199400.1	9.12986	3.82946	7.08581	1.15475	3.17312	4.25944	1.98507	0.930307	0.896704	1.17163	-1.22297	-2.3946	PF00134						AT5G02110.1	CYCD7,CYCD7;1	CYCLIN D7;1
Glyma.08G027600.1	288.098	426.985	333.919	133.952	236.926	219.361	339.447	323.747	307.569	-0.717822	-0.829646	-0.111824	PF02786,PF02785,PF00289	PTHR18866,PTHR18866:SF55	KOG0238	6.3.4.14,6.4.1.2	K01961	GO:0003824,GO:0008152,GO:0016874,GO:0005524,GO:0008716	AT5G35360.1	CAC2	acetyl Co-enzyme a carboxylase biotin carboxylase subunit
Glyma.12G031100.1	27.3896	13.4031	2.65718	1.15475	7.40394	3.19458	6.94775	12.094	8.96704	-1.25282	-1.88629	-0.633472
Glyma.13G235500.1	1.01443	2.87209	2.65718	2.30951	4.23082	8.51887	4.96268	1.86061	2.69011	0.662612	1.20247	0.539855	PF00226,PF01556	PTHR24077:SF88,PTHR24077	KOG0714				AT2G20560.1		DNAJ heat shock family protein
Glyma.03G196500.1	20.2886	37.3372	38.0862	48.4997	70.8663	99.0319	69.4775	87.4489	67.2528	-0.0376935	1.19019	1.22788							AT3G52710.1
Glyma.15G161000.1	101.443	52.6551	60.2294	56.583	41.2505	47.9187	93.2984	64.1912	68.1495	-0.6305	-0.556298	0.0742012	PF01230	PTHR23089	KOG3275				AT1G31160.1	HINT 2	HISTIDINE TRIAD NUCLEOTIDE-BINDING 2
Glyma.10G029600.1	7.101	12.4457	11.5144	1.15475	1.05771	1.06486	5.95522	6.51215	4.48352	-2.37077	-3.24452	-0.873752	PF00447	PTHR10015:SF7,PTHR10015	KOG0627			GO:0003700,GO:0043565,GO:0006355,GO:0005634	AT3G22830.1	AT-HSFA6B,HSFA6B	heat shock transcription factor A6B
Glyma.09G178900.1	2.02886	1.91473	0.885726	1.15475	1.05771	1.06486	0.992536	1.86061	1.79341	-0.503646	-0.559302	-0.0556556	PF01554	PTHR11206:SF51,PTHR11206	KOG1347			GO:0015238,GO:0015297,GO:0006855,GO:0055085,GO:0016020	AT5G52450.1		MATE efflux family protein
Glyma.10G235200.1	201.871	157.965	144.373	236.725	226.349	200.194	249.127	192.574	232.246	-0.0230435	0.395566	0.41861	PF00098	PTHR23002:SF35,PTHR23002				GO:0003676,GO:0008270	AT5G52380.1		VASCULAR-RELATED NAC-DOMAIN 6
Glyma.10G233400.1	77.0966	85.2055	57.5722	176.677	181.925	205.518	109.179	109.776	136.299	0.667152	1.35933	0.692173							AT4G25610.1		C2H2-like zinc finger protein
Glyma.08G253900.1	177.525	214.45	189.545	570.449	663.181	645.305	258.059	193.504	201.758	1.52405	1.69201	0.167964	PF00498	PTHR23308:SF2,PTHR23308	KOG1881			GO:0005515	AT5G38840.1		SMAD/FHA domain-containing protein
Glyma.13G204100.1	43.6204	36.3799	47.8292	93.5351	165.002	127.783	96.276	102.334	99.5341	0.373789	1.59558	1.22179	PF01428	PTHR10634				GO:0008270	AT3G12630.1		A20/AN1-like zinc finger family protein
Glyma.16G002800.1	95.3563	156.05	104.516	81.9876	86.7319	74.5401	83.373	107.916	101.328	-0.266513	-0.549066	-0.282553	PF01823	PTHR19324,PTHR19324:SF4					AT4G24290.2		MAC/Perforin domain-containing protein
Glyma.17G186900.1	31.4473	87.1202	52.2578	47.3449	68.7509	78.7996	57.5671	38.1426	59.1824	0.331436	0.190178	-0.141258	PF00133	PTHR11946,PTHR11946:SF5				GO:0000166,GO:0004812,GO:0005524,GO:0006418,GO:0002161	AT5G16715.1	EMB2247	ATP binding;valine-tRNA ligases;aminoacyl-tRNA ligases;nucleotide binding;ATP binding;aminoacyl-tRNA ligases
Glyma.18G249200.1	26.3751	28.7209	36.3148	20.7856	21.1541	27.6863	10.9179	20.4668	26.0044	0.278851	-0.392739	-0.67159	PF01535	PTHR24015,PTHR24015:SF142					AT1G71460.1		Pentatricopeptide repeat (PPR-like) superfamily protein
Glyma.12G172100.1	71.01	64.1434	72.6295	122.404	153.367	130.978	64.5148	74.4246	71.7363	0.949115	0.969061	0.0199465	PF00035	PTHR11207					AT2G28380.1	DRB2	dsRNA-binding protein 2
Glyma.18G138200.1	10.1443	15.3178	16.8288	45.0354	85.6742	56.4375	17.8656	13.0243	30.4879	1.60838	2.14575	0.537371	PF03181						AT1G70370.1	PG2	polygalacturonase 2
Glyma.08G260600.1	3.04329	1.91473	1.77145	4.61902	2.11541	3.19458	0.992536	1.86061	3.58681	0.624597	0.561157	-0.0634395
Glyma.15G129300.1	96.3707	129.244	79.7153	227.487	175.579	219.361	126.052	105.125	139.886	0.746242	1.02753	0.281292	PF04499	PTHR12634	KOG2073				AT1G30470.1		SIT4 phosphatase-associated family protein
Glyma.16G020300.1	13.1876	5.74419	7.97153	3.46426	2.11541	4.25944	0.992536	4.65154	0.896704	0.589066	-1.45118	-2.04025
Glyma.15G035300.1	187.669	197.217	196.631	151.273	206.253	165.053	255.082	242.81	267.218	-0.550018	-0.154175	0.395844	PF03153	PTHR12694,PTHR12694:SF2	KOG2652			GO:0006367,GO:0005672	AT1G07480.1		Transcription factor IIA, alpha/beta subunit
Glyma.14G108400.1	162.309	203.919	174.488	176.677	153.367	150.145	248.134	186.061	260.044	-0.531828	-0.171264	0.360564	PF00481	PTHR13832,PTHR13832:SF115	KOG0698	3.1.3.16	K14497	GO:0003824	AT1G72770.1	HAB1	homology to ABI1
Glyma.16G110900.1	12.1731	6.70155	11.5144	21.9403	26.4426	11.7135	6.94775	10.2334	17.0374	0.812503	0.983724	0.171221	PF01553	PTHR12497	KOG2847	2.3.1.-	K13511	GO:0016746,GO:0008152	AT1G78690.1		Phospholipid/glycerol acyltransferase family protein
Glyma.17G160700.1	16.2309	20.1047	15.9431	12.7023	22.2118	22.362	19.8507	34.4214	18.8308	-0.351993	0.131715	0.483708	PF04616	PTHR22925:SF3,PTHR22925				GO:0004553,GO:0005975	AT5G67540.1		Arabinanase/levansucrase/invertase
Glyma.10G053400.1	1.01443	0.957365	0.885726	1.15475	1.05771	1.06486	0.992536	1.86061	0.896704	-0.194318	0.197753	0.392071
Glyma.17G151100.1	675.61	969.81	894.583	974.613	962.512	990.319	789.066	588.885	720.053	0.480624	0.204811	-0.275813	PF00004,PF02190,PF05362	PTHR10046:SF24,PTHR10046	KOG2004	3.4.21.53	K01338	GO:0005524,GO:0004176,GO:0006508,GO:0004252,GO:0016887	AT5G47040.1	LON2	lon protease 2
Glyma.17G005500.1	202.886	225.938	171.831	498.854	536.257	560.116	261.037	208.389	185.618	1.2841	1.40915	0.125055		PTHR12663	KOG1525		K11267		AT5G47690.3		binding
Glyma.06G145400.1	5.07214	5.74419	3.5429	3.46426	4.23082	1.06486	3.97014	1.86061	2.69011	0.0399213	-0.712985	-0.752906	PF03195						AT2G40470.1	ASL11,LBD15	LOB domain-containing protein 15
Glyma.18G229100.1	149.121	138.818	115.144	214.784	193.56	176.767	90.3208	60.47	65.4594	1.43601	0.537633	-0.898377							AT4G23890.1
Glyma.02G184100.1	207.958	302.527	265.718	429.569	316.254	411.036	204.462	194.434	229.556	0.880336	0.575706	-0.30463	PF03385						AT2G41770.1		Protein of unknown function (DUF288)
Glyma.08G214500.1	701.985	550.485	636.837	688.234	413.563	535.624	552.843	489.342	520.088	0.0677793	-0.206432	-0.274211		PTHR23125:SF33,PTHR23125					AT1G15740.1		Leucine-rich repeat family protein
Glyma.05G144300.1	207.958	194.345	187.774	382.224	328.946	341.82	177.664	157.222	183.824	1.02149	0.835517	-0.185974		PTHR15067:SF7,PTHR15067	KOG4172				AT1G24440.1		RING/U-box superfamily protein
Glyma.12G088500.1	65.9379	49.783	60.2294	84.2971	68.7509	66.0213	19.8507	30.7001	9.86374	1.85842	0.31622	-1.5422	PF00561	PTHR10992,PTHR10992:SF198	KOG1454				AT3G44510.2		alpha/beta-Hydrolases superfamily protein
Glyma.11G046100.1	136.948	199.132	170.059	220.558	179.81	210.842	165.753	120.94	128.229	0.558828	0.272135	-0.286694		PTHR21477,PTHR21477:SF2					AT1G10150.1		Carbohydrate-binding protein
Glyma.07G208300.1	139.991	117.756	124.002	244.808	265.484	355.663	208.433	234.437	226.866	0.3707	1.18167	0.810969	PF04000,PF09368	PTHR13237,PTHR13237:SF5	KOG3118				AT2G43650.1	EMB2777	Sas10/U3 ribonucleoprotein (Utp) family protein
Glyma.10G131700.1	68.9812	77.5465	85.9154	77.3686	95.1935	115.005	89.3282	103.264	104.018	-0.0446697	0.30702	0.351689	PF00076,PF02136	PTHR10693:SF8,PTHR10693	KOG0116			GO:0003676,GO:0006810,GO:0005622	AT5G43960.1		Nuclear transport factor 2 (NTF2) family protein with RNA binding (RRM-RBD-RNP motifs) domain
Glyma.02G110400.1	141.006	105.31	131.087	110.856	79.3279	76.6699	137.962	173.967	130.919	-0.730762	-0.500055	0.230707							AT1G26750.1
Glyma.19G259800.1	1332.96	941.09	1081.47	914.566	988.955	746.466	1410.39	1386.16	1275.11	-0.619633	-0.340551	0.279082	PF00428	PTHR21141	KOG1762		K02942	GO:0003735,GO:0006414,GO:0005622,GO:0005840	AT5G24510.1		60S acidic ribosomal protein family
Glyma.15G196500.1	12.1731	12.4457	7.97153	8.08328	9.51935	10.6486	0.992536	1.86061	1.79341	2.60408	-0.206135	-2.81021	PF00512,PF02518,PF01590,PF08446,PF00989,PF00360	PTHR24423				GO:0006355,GO:0009584,GO:0018298,GO:0000155,GO:0007165,GO:0016020,GO:0005515,GO:0005524,GO:0004871	AT4G18130.1	PHYE	phytochrome E
Glyma.13G205300.1	57.8224	42.124	55.8007	2.30951	5.28853	8.51887	19.8507	31.6304	10.7604	-1.9493	-3.27256	-1.32326							AT1G61900.1
Glyma.08G181500.1	333.747	418.368	341.005	181.297	156.54	171.442	266	374.914	344.334	-0.95203	-1.10192	-0.149893	PF00141					GO:0004601,GO:0020037,GO:0006979,GO:0055114	AT4G25980.1		Peroxidase superfamily protein
Glyma.19G010800.1	1.01443	2.87209	1.77145	1.15475	1.05771	1.06486	0.992536	1.86061	0.896704	-0.194318	-0.787769	-0.593451	PF00171	PTHR11699,PTHR11699:SF46	KOG2450			GO:0016491,GO:0008152,GO:0055114	AT1G23800.1	ALDH2B,ALDH2B7	aldehyde dehydrogenase 2B7
Glyma.10G014200.1	3026.04	2305.33	2154.09	1987.33	1547.42	1528.07	1128.51	1169.4	1133.43	0.56117	-0.564147	-1.12532		PTHR23241	KOG2886				AT3G62580.1		Late embryogenesis abundant protein (LEA) family protein
Glyma.13G124500.1	141.006	131.159	115.144	116.63	130.098	106.486	144.91	111.637	139.886	-0.166534	-0.132943	0.0335919	PF07933	PTHR12847	KOG2500			GO:0006897,GO:0016020	AT1G03900.1	ATNAP4,NAP4	non-intrinsic ABC protein 4
Glyma.18G293000.1	96.3707	63.1861	78.8296	113.166	98.3666	95.8373	129.03	106.985	144.369	-0.307482	0.366674	0.674156							AT1G60640.1
Glyma.20G168600.1	3.04329	6.70155	3.5429	9.23804	5.28853	6.38915	0.992536	0.930307	0.896704	2.89105	0.654492	-2.23656
Glyma.06G175400.1	1896.98	2121.52	1797.14	1333.74	1885.89	1319.36	2790.02	2073.66	2446.21	-0.687476	-0.357566	0.32991	PF00076	PTHR24012,PTHR24012:SF56	KOG0131			GO:0003676	AT4G24770.1	ATRBP31,ATRBP33,CP31,RBP31	31-kDa RNA binding protein
Glyma.07G099100.1	1.01443	3.82946	1.77145	21.9403	30.6735	29.8161	2.97761	2.79092	3.58681	3.1393	3.63928	0.499976	PF05687,PF08699	PTHR22891					AT2G27040.1	AGO4,OCP11	Argonaute family protein
Glyma.19G054700.1	187.669	107.225	118.687	1.15475	1.05771	1.06486	27.791	37.2123	55.5956	-5.20156	-6.97951	-1.77795	PF01582,PF00931	PTHR11017:SF20,PTHR11017	KOG4658			GO:0043531,GO:0005515,GO:0007165	AT5G36930.2		Disease resistance protein (TIR-NBS-LRR class) family
Glyma.12G020400.1	291.141	351.353	370.233	330.26	261.253	267.28	339.447	255.835	286.048	-0.0373727	-0.237864	-0.200491	PF01061,PF00005	PTHR19241,PTHR19241:SF20	KOG0061			GO:0005524,GO:0016887,GO:0016020	AT3G21090.1		ABC-2 type transporter family protein
Glyma.14G087300.1	51.7359	58.3992	49.6007	27.7141	31.7312	36.2052	56.5745	86.5186	78.9099	-1.21474	-0.739843	0.474892	PF04788						AT3G19540.1		Protein of unknown function (DUF620)
Glyma.01G238300.1	120.717	73.7171	74.401	86.6066	87.7896	91.5779	109.179	120.01	95.0506	-0.285773	-0.0154359	0.270337	PF00628	PTHR24098:SF48,PTHR24098				GO:0005515	AT4G14920.1		Acyl-CoA N-acyltransferase with RING/FYVE/PHD-type zinc finger protein
Glyma.10G261800.1	350.992	290.082	314.433	372.986	395.582	341.82	304.709	268.859	321.02	0.311769	0.216725	-0.0950436	PF12263						AT2G15290.1	ATTIC21,CIA5,PIC1,TIC21	translocon at inner membrane of chloroplasts 21
Glyma.07G129000.1	20.2886	10.531	8.85726	6.92853	8.46164	5.3243	1.98507	2.79092	0.896704	1.86853	-0.937659	-2.80619	PF03171	PTHR10209,PTHR10209:SF55	KOG0143	1.14.17.4	K05933	GO:0016491,GO:0016706,GO:0055114	AT2G19590.1	ACO1,ATACO1	ACC oxidase 1
Glyma.15G193000.1	134.919	186.686	157.659	196.308	258.08	230.01	243.171	158.152	310.259	-0.0561964	0.514014	0.57021	PF00400,PF04003	PTHR19858	KOG0291		K14558	GO:0005515	AT1G15440.1	ATPWP2,PWP2	periodic tryptophan protein 2
Glyma.15G217000.1	31.4473	9.57365	8.85726	17.3213	7.40394	11.7135	13.8955	3.72123	4.48352	0.721409	-0.452937	-1.17435	PF01458					GO:0016226	AT4G04770.1	ABC1,ATABC1,ATNAP1,LAF6	ATP binding cassette protein 1
Glyma.06G174500.1	1.01443	1.91473	0.885726	1.15475	2.11541	3.19458	5.95522	2.79092	1.79341	-0.705148	0.760954	1.4661
Glyma.16G169600.1	2.02886	7.65892	2.65718	2.30951	3.17312	2.12972	3.97014	0.930307	5.38022	-0.433522	-0.697509	-0.263987	PF08263,PF00560	PTHR24420	KOG0472			GO:0005515	AT1G45616.1	AtRLP6,RLP6	receptor like protein 6
Glyma.07G098000.1	347.949	223.066	452.606	1586.63	1574.92	887.028	1107.67	859.604	1193.51	0.357134	1.98374	1.6266
Glyma.12G232800.1	3.04329	0.957365	2.65718	11.5475	3.17312	6.38915	2.97761	0.930307	1.79341	1.88855	1.66479	-0.223755	PF01788					GO:0015979,GO:0009523,GO:0009539,GO:0016020	ATCG00550.1		photosystem II reaction center protein J
Glyma.12G228800.1	788.211	1310.63	860.926	642.044	540.488	717.715	596.514	523.763	680.598	0.0774882	-0.639298	-0.716786	PF00085,PF00515	PTHR22904	KOG0907			GO:0045454,GO:0005515	AT1G53300.1	TTL1	tetratricopetide-repeat thioredoxin-like 1
Glyma.10G258400.1	105.501	164.667	129.316	113.166	178.752	162.923	119.104	100.473	87.877	0.564992	0.187229	-0.377763	PF04484						AT1G49890.1		Family of unknown function (DUF566)
Glyma.09G058900.1	1.01443	3.82946	3.5429	6.92853	3.17312	6.38915	0.992536	0.930307	0.896704	2.54813	0.97547	-1.57266	PF01237	PTHR10972	KOG2210				AT5G57240.1	ORP4C	OSBP(oxysterol binding protein)-related protein 4C
Glyma.10G130500.1	2.02886	5.74419	4.42863	1.15475	1.05771	1.06486	11.9104	2.79092	7.17363	-2.73869	-1.89649	0.842203							AT1G70650.2		Ran BP2/NZF zinc finger-like superfamily protein
Glyma.03G172500.1	204.915	126.372	162.088	346.426	325.773	288.577	444.656	439.105	379.306	-0.394658	0.961518	1.35618	PF00125	PTHR23428	KOG1744		K11252	GO:0003677	AT2G37470.1		Histone superfamily protein
Glyma.14G155500.1	18.2597	14.3605	14.1716	24.2499	32.7889	27.6863	16.8731	12.094	16.1407	0.909413	0.856533	-0.0528798	PF00069,PF00582	PTHR24420,PTHR24420:SF425	KOG1187			GO:0004672,GO:0005524,GO:0006468,GO:0006950	AT1G77280.1		Protein kinase protein with adenine nucleotide alpha hydrolases-like domain
Glyma.10G276100.1	6.08657	8.61628	3.5429	1.15475	5.28853	12.7783	13.8955	12.094	8.96704	-0.862834	0.0751667	0.938001	PF00170	PTHR22952:SF55,PTHR22952				GO:0003700,GO:0043565,GO:0006355,GO:0006351	AT1G68640.1	PAN	bZIP transcription factor family protein
Glyma.11G256100.1	12.1731	8.61628	8.85726	17.3213	4.23082	13.8432	12.903	9.30307	8.07033	0.225366	0.255687	0.0303215	PF00234						AT1G55260.2		Bifunctional inhibitor/lipid-transfer protein/seed storage 2S albumin superfamily protein
Glyma.14G153700.1	4.05771	4.78682	5.31436	3.46426	1.05771	1.06486	1.98507	0.930307	2.69011	-0.00481086	-1.34161	-1.3368
Glyma.09G014600.1	132.89	111.054	77.9439	177.832	174.521	240.658	150.865	142.337	133.609	0.474462	0.8815	0.407038		PTHR12663	KOG1525		K11267		AT5G47690.1		binding
Glyma.01G174100.1	251.578	201.047	188.66	397.236	280.292	352.468	321.582	311.653	291.429	0.155639	0.683602	0.527963							AT4G36600.1		Late embryogenesis abundant (LEA) protein
Glyma.07G132600.1	65.9379	78.5039	71.7438	124.714	139.617	137.367	52.6044	44.6548	52.9055	1.41956	0.893839	-0.525725	PF03330,PF01357						AT2G37640.1	ATEXP3,ATEXPA3,ATHEXP ALPHA 1.9,EXP3	Barwin-like endoglucanases superfamily protein
Glyma.08G071700.1	1.01443	2.87209	1.77145	4.61902	3.17312	4.25944	2.97761	0.930307	2.69011	0.869115	1.09086	0.221749	PF00656		KOG1546			GO:0004197,GO:0006508	AT1G02170.1	AMC1,ATMC1,ATMCPB1,LOL3,MCP1B	metacaspase 1
Glyma.13G328000.1	2.02886	2.87209	3.5429	1.15475	2.11541	2.12972	3.97014	7.44246	3.58681	-1.47391	-0.644973	0.828933	PF02309,PF06507,PF02362					GO:0006355,GO:0005634,GO:0003677,GO:0009725	AT5G60450.1	ARF4	auxin response factor 4
Glyma.07G134800.1	4.05771	13.4031	11.5144	9.23804	9.51935	1.06486	21.8358	19.5365	19.7275	-1.62405	-0.547701	1.07634	PF02309,PF06507,PF02362					GO:0006355,GO:0005634,GO:0003677,GO:0009725	AT4G23980.1	ARF9	auxin response factor 9
Glyma.12G076100.1	576.196	671.113	644.809	804.864	801.741	861.471	761.275	686.567	883.253	0.082379	0.383386	0.301007	PF04499	PTHR12634:SF8,PTHR12634	KOG2073				AT1G07990.1		SIT4 phosphatase-associated family protein
Glyma.17G257000.1	2.02886	0.957365	3.5429	2.30951	1.05771	2.12972	0.992536	0.930307	0.896704	0.963164	-0.248263	-1.21143
Glyma.18G040400.1	517.359	393.477	433.12	406.474	427.313	419.554	526.044	490.272	552.369	-0.323777	-0.100706	0.223071	PF00076	PTHR19965,PTHR19965:SF8	KOG0533		K12881	GO:0003676	AT5G37720.2	ALY4	ALWAYS EARLY 4
Glyma.04G237700.1	10.1443	4.78682	2.65718	10.3928	14.8079	5.3243	3.97014	4.65154	8.07033	0.870832	0.795375	-0.0754571
Glyma.04G187700.1	80.1399	59.3566	51.3721	258.665	240.099	247.047	48.6343	40.9335	84.2901	2.1009	1.96623	-0.134671	PF00564					GO:0005515	AT3G48240.1		Octicosapeptide/Phox/Bem1p family protein
Glyma.11G079600.1	2718.67	2207.68	2344.52	2647.85	2439.07	2099.9	2999.44	2723.01	2820.13	-0.249319	-0.0167734	0.232545	PF03931,PF01466	PTHR11165	KOG1724			GO:0006511	AT1G75950.1	ASK1,ATSKP1,SKP1,SKP1A,UIP1	S phase kinase-associated protein 1
Glyma.08G004200.1	9.12986	10.531	7.97153	3.46426	5.28853	15.9729	12.903	27.9092	17.9341	-1.24849	-0.160351	1.08814	PF00069,PF08263,PF00560	PTHR24420:SF422,PTHR24420	KOG1187			GO:0004672,GO:0005524,GO:0006468,GO:0005515	AT5G63710.1		Leucine-rich repeat protein kinase family protein
Glyma.02G190000.1	21.303	10.531	18.6002	50.8092	25.3849	11.7135	11.9104	19.5365	25.1077	0.636344	0.801584	0.16524	PF11815,PF01734	PTHR11711,PTHR11711:SF1	KOG2214	2.3.1.51,3.1.1.13,3.1.1.3,3.1.1.4	K14674	GO:0006629	AT5G04040.1	SDP1	Patatin-like phospholipase family protein
Glyma.04G231500.1	413.887	295.826	320.633	314.093	257.022	195.934	524.059	616.794	491.394	-1.08947	-0.425736	0.663731	PF00240,PF01020	PTHR10666	KOG0003		K02927	GO:0005515,GO:0003735,GO:0006412,GO:0005840	AT2G36170.1		Ubiquitin supergroup;Ribosomal protein L40e
Glyma.16G050700.1	73.0389	84.2481	58.4579	227.487	209.426	155.469	97.2685	66.0518	63.666	1.38392	1.4572	0.0732789	PF02893						AT5G13200.1		GRAM domain family protein
Glyma.17G036900.1	205.929	72.7597	101.858	25.4046	8.46164	27.6863	14.888	33.4911	15.244	-0.0477304	-2.62818	-2.58045	PF00450	PTHR11802:SF8,PTHR11802				GO:0004185,GO:0006508	AT3G17180.1	scpl33	serine carboxypeptidase-like 33
Glyma.08G223100.1	247.521	111.054	156.774	166.285	124.809	117.135	100.246	97.6823	122.848	0.347807	-0.336171	-0.683978
Glyma.13G323500.1	86.2264	88.0776	105.401	43.8807	51.8276	63.8915	65.5074	68.8427	48.422	-0.195587	-0.809449	-0.613862	PF01061,PF00005	PTHR19241,PTHR19241:SF20	KOG0061			GO:0005524,GO:0016887,GO:0016020	AT2G28070.1		ABC-2 type transporter family protein
Glyma.11G070600.1	4.05771	5.74419	0.885726	8.08328	1.05771	1.06486	9.92536	1.86061	0.896704	-0.313463	-0.0665458	0.246917	PF05368	PTHR10366,PTHR10366:SF62				GO:0003854,GO:0016616,GO:0006694,GO:0055114	AT4G39230.1		NmrA-like negative transcriptional regulator family protein
Glyma.03G080600.1	6.08657	2.87209	3.5429	4.61902	3.17312	2.12972	8.93282	5.58184	8.96704	-1.24286	-0.333428	0.909428	PF00651,PF03000	PTHR13690:SF174,PTHR13690				GO:0005515	AT5G48800.1		Phototropic-responsive NPH3 family protein
Glyma.04G123900.1	486.926	801.314	686.438	422.64	454.813	512.197	530.014	614.933	561.337	-0.296135	-0.506895	-0.21076	PF01055	PTHR22762:SF7,PTHR22762	KOG1065			GO:0004553,GO:0005975	AT3G23640.1	HGL1	heteroglycan glucosidase 1
Glyma.10G010200.1	124.775	134.031	143.488	77.3686	64.52	71.3456	94.2909	170.246	128.229	-0.881231	-0.915809	-0.0345789	PF00025	PTHR11711	KOG0070		K07977	GO:0005525,GO:0007264,GO:0005634,GO:0005737,GO:0005622	AT5G14670.1	ARFA1B,ATARFA1B	ADP-ribosylation factor A1B
Glyma.05G210400.1	16.2309	29.6783	24.8003	23.0951	16.9233	25.5566	14.888	13.0243	13.4506	0.664809	-0.108758	-0.773567	PF04646	PTHR10811:SF5,PTHR10811	KOG2246			GO:0016757,GO:0016020	AT4G23490.1		Protein of unknown function (DUF604)
Glyma.13G315600.1	24.3463	32.5504	33.6576	40.4164	31.7312	39.3998	24.8134	38.1426	35.8681	0.174721	0.300802	0.126081
Glyma.09G196400.1	30.4329	31.593	38.9719	9.23804	8.46164	11.7135	22.8283	25.1183	16.1407	-1.12358	-1.77979	-0.656214	PF03007,PF06974					GO:0004144,GO:0045017	AT5G53390.1		O-acyltransferase (WSD1-like) family protein
Glyma.17G099100.1	10.1443	3.82946	4.42863	8.08328	12.6925	10.6486	13.8955	11.1637	5.38022	0.045942	0.77199	0.726048	PF03634	PTHR11584:SF275,PTHR11584					AT3G47620.1	AtTCP14,TCP14	TEOSINTE BRANCHED, cycloidea and PCF (TCP) 14
Glyma.04G065500.1	238.391	534.21	445.52	652.436	786.933	898.741	600.484	506.087	659.974	0.404412	0.940686	0.536274	PF00917	PTHR24007:SF24,PTHR24007	KOG1987			GO:0005515	AT2G25320.1		TRAF-like family protein
Glyma.04G257400.1	10.1443	11.4884	18.6002	28.8689	17.981	18.1026	3.97014	3.72123	5.38022	2.31295	0.691008	-1.62194	PF04424	PTHR18063					AT4G11860.1		Protein of unknown function (DUF544)
Glyma.U032500.1	7578.8	7180.24	7182.35	8943.58	5304.39	4690.7	1439.18	1469.89	1104.74	2.23829	-0.212319	-2.45061	PF01014	PTHR10395:SF1,PTHR10395	KOG1599	1.7.3.3	K00365		AT2G26230.1		uricase / urate oxidase / nodulin 35, putative
Glyma.04G114200.1	1.01443	0.957365	0.885726	3.46426	1.05771	1.06486	2.97761	1.86061	2.69011	-0.430301	0.967266	1.39757							AT5G56220.1		P-loop containing nucleoside triphosphate hydrolases superfamily protein
Glyma.20G007700.1	4.05771	8.61628	7.08581	3.46426	4.23082	2.12972	8.93282	13.0243	3.58681	-1.37848	-1.00807	0.370412	PF00170	PTHR22952:SF6,PTHR22952				GO:0003700,GO:0043565,GO:0006355,GO:0003677,GO:0005634	AT4G36730.2	GBF1	G-box binding factor 1
Glyma.06G065300.1	41.5916	35.4225	30.1147	16.1666	20.0964	21.2972	25.8059	31.6304	30.4879	-0.611192	-0.896203	-0.285012
Glyma.17G138600.1	170.424	145.519	129.316	120.095	122.694	103.291	142.925	146.058	120.158	-0.241496	-0.363542	-0.122046	PF00923	PTHR10683	KOG2772	2.2.1.2	K00616	GO:0005975	AT1G12230.1		Aldolase superfamily protein
Glyma.12G077300.1	464.608	444.217	455.263	299.081	245.388	274.734	373.194	362.82	369.442	-0.432348	-0.735645	-0.303297	PF00069	PTHR24420,PTHR24420:SF809	KOG1187			GO:0004672,GO:0005524,GO:0006468	AT2G28250.1	NCRK	Protein kinase superfamily protein
Glyma.13G076700.1	1342.09	1603.59	1493.33	1560.07	1127.51	1304.45	1880.86	1427.09	1707.32	-0.329201	-0.153111	0.17609	PF04873				K14514	GO:0005634	AT3G20770.1	AtEIN3,EIN3	Ethylene insensitive 3 family protein
Glyma.11G025200.1	7.101	5.74419	7.08581	2.30951	10.5771	6.38915	14.888	26.0486	11.6571	-1.44811	-0.0482292	1.39988	PF03763						AT5G23750.2		Remorin family protein
Glyma.07G198400.1	20.2886	12.4457	15.0573	5.77377	8.46164	9.58373	5.95522	10.2334	6.27693	0.0844094	-1.00464	-1.08905							AT1G28250.1
Glyma.05G240000.1	27.3896	29.6783	26.5718	13.8571	5.28853	20.2323	37.7164	32.5608	34.9714	-1.41834	-1.0868	0.331541	PF02934,PF02637	PTHR11659	KOG2438	6.3.5.6,6.3.5.7	K02434	GO:0016884,GO:0016874	AT1G48520.1	GATB	GLU-ADT subunit B
Glyma.13G270400.1	153.179	244.128	198.403	132.797	122.694	162.923	210.418	190.713	223.279	-0.577562	-0.509677	0.0678846	PF00311			4.1.1.31	K01595	GO:0008964,GO:0006099,GO:0015977	AT3G14940.1	ATPPC3,PPC3	phosphoenolpyruvate carboxylase 3
Glyma.10G202100.1	61.8802	21.062	31.8861	18.4761	20.0964	19.1675	26.7985	40.0032	34.9714	-0.817715	-0.991837	-0.174122
Glyma.08G244800.1	20.2886	18.1899	33.6576	24.2499	19.0387	4.25944	43.6716	30.7001	52.0088	-1.41032	-0.601337	0.808981	PF00201	PTHR11926,PTHR11926:SF15	KOG1192			GO:0016758,GO:0008152	AT3G02100.1		UDP-Glycosyltransferase superfamily protein
Glyma.11G118500.1	601.556	602.182	646.58	445.735	556.353	583.543	671.947	714.476	609.759	-0.332185	-0.222716	0.109469	PF00400	PTHR19850,PTHR19850:SF3	KOG0286		K04536	GO:0005515	AT4G34460.1	AGB1,ATAGB1,ELK4	GTP binding protein beta 1
Glyma.15G115400.1	552.864	388.69	414.52	375.295	331.062	310.939	310.664	365.611	377.512	-0.0508434	-0.414696	-0.363852	PF08569	PTHR10182	KOG1566				AT5G47540.1		Mo25 family protein
Glyma.18G054800.1	30.4329	29.6783	36.3148	9.23804	16.9233	7.45401	21.8358	31.6304	13.4506	-0.993249	-1.5203	-0.527053							AT5G58375.1		Methyltransferase-related protein
Glyma.07G091600.1	167.381	174.24	243.575	199.773	443.179	133.107	104.216	56.7487	52.9055	1.85943	0.407246	-1.45218	PF03195						AT3G02550.1	LBD41	LOB domain-containing protein 41
Glyma.17G107600.1	526.489	476.768	503.092	1211.34	1045.01	833.785	1085.83	972.171	924.502	0.0511446	1.03661	0.98547
Glyma.16G057400.1	11.1587	21.062	24.8003	23.0951	23.2695	20.2323	41.6865	51.1669	19.7275	-0.757434	0.223961	0.981395	PF00004	PTHR23073,PTHR23073:SF13				GO:0005524	AT1G53750.1	RPT1A	regulatory particle triple-A 1A
Glyma.05G158000.1	12.1731	3.82946	7.08581	5.77377	1.05771	7.45401	9.92536	10.2334	6.27693	-0.887935	-0.692618	0.195317	PF05057	PTHR12482	KOG4372				AT1G29120.1		Hydrolase-like protein family
Glyma.13G271500.1	29.4184	28.7209	15.0573	17.3213	24.3272	13.8432	26.7985	42.7941	30.4879	-0.850817	-0.399506	0.451311	PF01715	PTHR11088,PTHR11088:SF21	KOG1384	2.5.1.75	K00791	GO:0005524,GO:0008033,GO:0004161,GO:0009058	AT5G20040.1	ATIPT9,IPT9	isopentenyltransferase 9
Glyma.20G086100.1	6.08657	4.78682	5.31436	4.61902	4.23082	6.38915	2.97761	0.930307	1.79341	1.4184	-0.0871348	-1.50553	PF04045	PTHR12058				GO:0030833,GO:0005856	AT2G33385.1	arpc2b	actin-related protein C2B
Glyma.05G129400.1	132.89	133.074	94.7727	79.6781	56.0584	70.2807	196.522	141.407	173.961	-1.31307	-0.808181	0.504886							AT1G29950.1		basic helix-loop-helix (bHLH) DNA-binding superfamily protein
Glyma.19G047100.1	362.151	321.675	409.205	264.439	334.235	233.204	321.582	277.232	267.218	-0.0580466	-0.393891	-0.335844							AT5G16110.1
Glyma.11G096300.1	29.4184	16.2752	20.3717	5.77377	22.2118	14.908	47.6417	40.9335	47.5253	-1.66584	-0.62313	1.04271							AT3G22210.1
Glyma.10G105800.1	35.505	25.8488	32.7719	58.8925	65.5777	63.8915	16.8731	37.2123	26.0044	1.23382	1.00085	-0.23297		PTHR22748					AT2G41460.2	ARP	apurinic endonuclease-redox protein
Glyma.14G061400.1	87.2409	45.9535	95.6584	57.7377	56.0584	63.8915	67.4924	64.1912	49.3187	-0.0266648	-0.365076	-0.338411	PF09258	PTHR11062:SF23,PTHR11062				GO:0016758,GO:0031227	AT3G55830.1	EPC1	Nucleotide-diphospho-sugar transferases superfamily protein
Glyma.08G222300.1	144.049	131.159	163.859	60.0473	95.1935	144.821	72.4551	132.104	112.985	-0.0816952	-0.549183	-0.467488	PF10250						AT3G21190.1		O-fucosyltransferase family protein
Glyma.13G017900.1	11.1587	2.87209	2.65718	11.5475	1.05771	3.19458	12.903	5.58184	3.58681	-0.482284	-0.0789009	0.403383
Glyma.08G063500.1	322.588	350.395	294.947	174.368	207.31	195.934	317.611	384.217	313.846	-0.814265	-0.744802	0.0694629	PF00155	PTHR11751,PTHR11751:SF22	KOG0257	2.6.1.83	K10206	GO:0030170,GO:0009058,GO:0016846	AT4G33680.1	AGD2	Pyridoxal phosphate (PLP)-dependent transferases superfamily protein
Glyma.05G233100.1	41.5916	46.9109	41.6291	13.8571	39.1351	27.6863	39.7014	39.0729	34.9714	-0.495557	-0.689715	-0.194158	PF00400	PTHR22844	KOG0641			GO:0005515	AT1G49040.3	SCD1	stomatal cytokinesis defective / SCD1 protein (SCD1)
Glyma.13G011300.1	2.02886	1.91473	0.885726	1.15475	4.23082	1.06486	2.97761	1.86061	1.79341	-0.0399667	0.417579	0.457546
Glyma.09G222200.1	25.3607	40.2093	39.8577	6.92853	15.8656	18.1026	74.4402	113.497	71.7363	-2.66664	-1.3662	1.30045	PF02519				K14488		AT4G34760.1		SAUR-like auxin-responsive protein family
Glyma.20G046400.1	7.101	2.87209	12.4002	1.15475	1.05771	1.06486	0.992536	2.79092	0.896704	-0.514042	-2.77119	-2.25715		PTHR23422,PTHR23422:SF4					AT1G79690.1	atnudt3,NUDT3	nudix hydrolase homolog 3
Glyma.06G128000.1	237.376	159.88	121.344	331.415	350.101	273.669	293.791	310.723	268.114	0.130412	0.881154	0.750742	PF04969	PTHR12356	KOG2265				AT5G53400.1	BOB1	HSP20-like chaperones superfamily protein
Glyma.18G080800.1	4.05771	1.91473	0.885726	1.15475	1.05771	2.12972	0.992536	0.930307	0.896704	0.622956	-0.659405	-1.28236
Glyma.06G038800.1	2.02886	5.74419	0.885726	3.46426	2.11541	5.3243	1.98507	2.79092	1.79341	0.73102	0.332619	-0.398401	PF01929	PTHR11127				GO:0003735,GO:0006412,GO:0005622,GO:0005840	AT4G27090.1		Ribosomal protein L14
Glyma.02G095900.1	14.202	24.8915	20.3717	21.9403	24.3272	35.1404	22.8283	12.094	23.3143	0.483243	0.453124	-0.0301187		PTHR21726:SF16,PTHR21726					AT2G39435.1		Phosphatidylinositol N-acetyglucosaminlytransferase subunit P-related
Glyma.18G109900.1	24.3463	35.4225	31.0004	31.1784	30.6735	48.9835	97.2685	54.8881	83.3934	-1.08762	0.288144	1.37576	PF00378	PTHR11941,PTHR11941:SF19	KOG1684	3.1.2.4	K05605	GO:0003824,GO:0008152	AT1G06550.1		ATP-dependent caseinolytic (Clp) protease/crotonase family protein
Glyma.10G216600.1	106.515	141.69	145.259	142.035	165.002	124.589	135.977	172.107	187.411	-0.199092	0.133548	0.33264	PF09335	PTHR12677	KOG3140				AT4G09580.1		SNARE associated Golgi protein family
Glyma.10G159400.1	167.381	88.0776	108.059	615.484	438.948	469.603	33.7462	39.0729	16.1407	4.0986	2.0678	-2.0308	PF04927						AT3G22490.1		Seed maturation protein
Glyma.20G116900.1	50.7214	35.4225	32.7719	21.9403	17.981	38.3349	21.8358	31.6304	20.6242	0.0789191	-0.603662	-0.682581	PF03062	PTHR13285:SF16,PTHR13285	KOG3860				AT1G57600.1		MBOAT (membrane bound O-acyl transferase) family protein
Glyma.01G137200.1	760.822	597.396	587.236	433.033	322.6	314.133	811.894	832.625	794.479	-1.18899	-0.86281	0.326183	PF04690						AT2G45190.1	AFO,FIL,YAB1	Plant-specific transcription factor YABBY family protein
Glyma.07G118800.1	222.16	179.027	169.174	197.463	199.906	166.118	157.813	171.177	169.477	0.176886	-0.0174913	-0.194377	PF00022	PTHR11937,PTHR11937:SF32	KOG0679				AT1G18450.1	ARP4,ATARP4	actin-related protein 4
Glyma.02G293200.1	194.77	221.151	217.003	644.353	637.796	555.856	345.403	388.868	350.611	0.760603	1.53804	0.777433	PF09750,PF01805	PTHR13161,PTHR13161:SF1	KOG1847			GO:0003723,GO:0006396	AT5G55100.2		SWAP (Suppressor-of-White-APricot)/surp domain-containing protein
Glyma.16G147100.1	27.3896	11.4884	17.7145	12.7023	10.5771	5.3243	18.8582	11.1637	7.17363	-0.378929	-0.984411	-0.605482
Glyma.10G008700.1	839.947	1185.22	1034.53	1540.44	1500.88	1454.6	1123.55	995.429	1229.38	0.425163	0.555231	0.130068	PF00917	PTHR24006,PTHR24006:SF29				GO:0005515	AT1G04300.1		TRAF-like superfamily protein
Glyma.13G147400.1	1.01443	2.87209	0.885726	27.7141	14.8079	24.4918	7.94029	19.5365	8.96704	0.878785	3.81172	2.93293
Glyma.06G136900.1	72.0244	120.628	78.8296	68.1305	114.232	81.9942	133.992	120.94	148.853	-0.611101	-0.0383697	0.572731	PF00400	PTHR19919	KOG0290			GO:0005515	AT5G24520.1	ATTTG1,TTG,TTG1,URM23	Transducin/WD40 repeat-like superfamily protein
Glyma.18G187500.1	246.506	227.853	223.203	675.532	699.143	694.288	317.611	320.026	312.95	1.12202	1.56851	0.446497	PF00069	PTHR24420:SF691,PTHR24420	KOG1187			GO:0004672,GO:0005524,GO:0006468,GO:0030247	AT5G02070.1		Protein kinase family protein
Glyma.11G224000.1	2.02886	4.78682	4.42863	1.15475	1.05771	2.12972	1.98507	2.79092	1.79341	-0.597343	-1.3727	-0.775362	PF00854	PTHR11654:SF37,PTHR11654				GO:0005215,GO:0006810,GO:0016020	AT2G37900.1		Major facilitator superfamily protein
Glyma.02G174400.1	357.079	313.058	390.605	520.794	559.526	386.544	451.604	376.774	437.591	0.212493	0.467661	0.255169							AT3G57785.1
Glyma.02G010700.1	129.847	97.6512	104.516	128.178	66.6355	142.691	78.4103	69.7731	91.4638	0.493994	0.0236631	-0.470331							AT1G02380.1
Glyma.06G195000.1	89.2697	118.713	93.887	34.6426	68.7509	61.7618	247.141	184.201	316.536	-2.17898	-0.870103	1.30888	PF03330,PF01357						AT2G03090.1	ATEXP15,ATEXPA15,ATHEXP ALPHA 1.3,EXP15,EXPA15	expansin A15
Glyma.16G056500.1	4.05771	0.957365	3.5429	9.23804	3.17312	6.38915	0.992536	0.930307	0.896704	2.73722	1.13541	-1.60181	PF01300	PTHR17490	KOG3051			GO:0003725	AT3G01920.1		DHBP synthase RibB-like alpha/beta domain
Glyma.16G012700.1	44.6349	65.1008	68.2009	107.392	100.482	68.151	111.164	67.9124	78.9099	0.0975051	0.633437	0.535932	PF05922,PF02225,PF00082	PTHR10795,PTHR10795:SF17				GO:0004252,GO:0006508,GO:0042802,GO:0043086	AT3G14240.1		Subtilase family protein
Glyma.13G140300.1	3.04329	1.91473	1.77145	1.15475	1.05771	5.3243	2.97761	5.58184	7.17363	-1.06179	0.163451	1.22524							AT2G37195.1
Glyma.12G049300.1	21.303	6.70155	17.7145	17.3213	11.6348	5.3243	22.8283	17.6758	16.1407	-0.724561	-0.415413	0.309148
Glyma.15G042800.1	13.1876	7.65892	15.0573	1.15475	3.17312	14.908	2.97761	6.51215	8.96704	0.0596491	-0.900337	-0.959986
Glyma.18G082300.1	1.01443	1.91473	1.77145	1.15475	1.05771	5.3243	0.992536	0.930307	3.58681	0.451981	0.681096	0.229115	PF00931	PTHR23155	KOG4658			GO:0043531	AT3G07040.1	RPM1,RPS3	NB-ARC domain-containing disease resistance protein
Glyma.12G042400.1	42.606	34.4651	29.229	6.92853	9.51935	11.7135	39.7014	42.7941	22.4176	-1.89741	-1.91636	-0.0189472	PF00483	PTHR22572,PTHR22572:SF10	KOG1322	2.7.7.27	K00975	GO:0016779,GO:0009058	AT4G39210.1	APL3	Glucose-1-phosphate adenylyltransferase family protein
Glyma.05G066700.1	188.684	162.752	120.459	86.6066	89.905	90.513	206.447	185.131	208.035	-1.16706	-0.821492	0.345569	PF00069	PTHR24343,PTHR24343:SF58	KOG0583			GO:0004672,GO:0005524,GO:0006468	AT4G33950.1	ATOST1,OST1,P44,SNRK2-6,SNRK2.6,SRK2E	Protein kinase superfamily protein
Glyma.09G196800.1	25.3607	19.1473	14.1716	60.0473	85.6742	75.605	21.8358	20.4668	10.7604	2.0604	1.91524	-0.145154	PF03094					GO:0006952,GO:0016021	AT2G17480.1	ATMLO8,MLO8	Seven transmembrane MLO family protein
Glyma.08G300900.1	3.04329	1.91473	1.77145	19.6308	4.23082	3.19458	3.97014	4.65154	2.69011	1.25813	2.0074	0.749263	PF05919						ATMG01410.1		open reading frame 204
Glyma.16G138600.1	1.01443	4.78682	0.885726	1.15475	2.11541	3.19458	3.97014	4.65154	2.69011	-0.807162	-0.0487614	0.758401
Glyma.05G015400.1	3.04329	4.78682	9.74299	4.61902	1.05771	3.19458	3.97014	6.51215	8.96704	-1.1325	-0.986151	0.146352	PF00122,PF00702	PTHR24092:SF18,PTHR24092	KOG0206	3.6.3.1	K01530	GO:0000166,GO:0046872	AT3G25610.1		ATPase E1-E2 type family protein / haloacid dehalogenase-like hydrolase family protein
Glyma.20G155100.1	3.04329	0.957365	3.5429	1.15475	2.11541	1.06486	0.992536	0.930307	0.896704	0.620577	-0.799204	-1.41978	PF00847				K09286	GO:0003700,GO:0006355	AT4G25470.1	ATCBF2,CBF2,DREB1C,FTQ4	C-repeat/DRE binding factor 2
Glyma.01G097100.1	48.6926	36.3799	32.7719	8.08328	6.34623	13.8432	60.5447	51.1669	36.7649	-2.39275	-2.0594	0.333352	PF00153	PTHR24089:SF114,PTHR24089	KOG0758		K03454		AT5G46800.1	BOU	Mitochondrial substrate carrier family protein
Glyma.06G233400.1	2.02886	1.91473	5.31436	4.61902	1.05771	1.06486	5.95522	3.72123	0.896704	-0.649246	-0.457604	0.191641
Glyma.11G065200.1	2.02886	8.61628	3.5429	3.46426	4.23082	7.45401	5.95522	3.72123	7.17363	-0.153523	0.0945564	0.248079	PF03514						AT4G36710.1		GRAS family transcription factor
Glyma.01G242000.1	3931.93	5403.37	4991.07	3416.92	3786.59	3380.93	5597.9	4341.74	5694.07	-0.562717	-0.436728	0.125989		PTHR13890	KOG2662				AT3G19640.1	MGT4,MRS2-3	magnesium transporter 4
Glyma.07G107500.1	29.4184	26.8062	23.9146	68.1305	75.0971	57.5024	33.7462	51.1669	34.0747	0.754442	1.32468	0.570234		PTHR10593	KOG2462			GO:0046872	AT1G68130.1	AtIDD14,IDD14	indeterminate(ID)-domain 14
Glyma.12G043500.1	908.928	1177.56	1171.82	2080.87	1460.69	1288.48	596.514	350.726	538.919	1.70045	0.567914	-1.13253							AT5G60050.1		BTB/POZ domain-containing protein
Glyma.19G082500.1	514.315	620.372	659.866	744.817	819.722	781.607	797.006	619.585	769.372	0.102024	0.386667	0.284644	PF09785,PF01798,PF08060	PTHR13904	KOG2574		K12844		AT1G60170.1	emb1220	pre-mRNA processing ribonucleoprotein binding region-containing protein
Glyma.12G224300.1	30.4329	30.6357	30.1147	5.77377	6.34623	9.58373	2.97761	9.30307	5.38022	0.297385	-2.07082	-2.36821							AT1G53035.1
Glyma.06G176900.1	374.324	352.31	303.804	397.236	468.564	387.609	936.954	524.693	633.073	-0.740901	0.282598	1.0235	PF03144,PF00009,PF03143	PTHR23115,PTHR23115:SF31	KOG0460	3.6.5.3	K02358	GO:0003924,GO:0005525	AT4G20360.1	ATRAB8D,ATRABE1B,RABE1b	RAB GTPase homolog E1B
Glyma.06G196400.1	83.1832	66.0582	77.0582	83.1423	77.2125	103.291	102.231	102.334	92.3605	-0.171498	0.22037	0.391868	PF00122,PF00702	PTHR24092:SF18,PTHR24092	KOG0206			GO:0000166,GO:0046872	AT1G68710.1		ATPase E1-E2 type family protein / haloacid dehalogenase-like hydrolase family protein
Glyma.02G159900.1	21.303	14.3605	6.20008	4.61902	10.5771	11.7135	8.93282	11.1637	8.96704	-0.111094	-0.637578	-0.526484	PF01061,PF00005,PF08370	PTHR19241,PTHR19241:SF10	KOG0065			GO:0005524,GO:0016887,GO:0016020	AT1G66950.1	ATPDR11,PDR11	pleiotropic drug resistance 11
Glyma.10G172200.1	171.438	211.578	222.317	70.44	63.4623	66.0213	201.485	478.178	234.04	-2.19228	-1.59828	0.593995	PF00534,PF08323	PTHR12526,PTHR12526:SF17		2.4.1.242	K13679	GO:0009058	AT1G32900.1		UDP-Glycosyltransferase superfamily protein
Glyma.12G071800.1	9.12986	8.61628	7.08581	8.08328	10.5771	11.7135	21.8358	25.1183	29.5912	-1.33349	0.290629	1.62412	PF00561	PTHR10992,PTHR10992:SF238					AT5G02970.1		alpha/beta-Hydrolases superfamily protein
Glyma.14G099000.1	23.3319	15.3178	28.3432	9.23804	11.6348	11.7135	28.7835	22.3274	26.9011	-1.25943	-1.03975	0.219688	PF09265,PF01565	PTHR11748:SF31,PTHR11748	KOG1231	1.5.99.12	K00279	GO:0008762,GO:0016491,GO:0050660,GO:0055114,GO:0019139,GO:0009690	AT5G21482.1	ATCKX5,CKX7	cytokinin oxidase 7
Glyma.02G034700.1	5.07214	12.4457	6.20008	8.08328	19.0387	17.0377	16.8731	10.2334	4.48352	0.483263	0.896751	0.413488	PF03181						AT1G70370.1	PG2	polygalacturonase 2
Glyma.14G015600.1	270.852	226.895	214.346	296.772	296.158	346.079	225.306	280.023	243.007	0.327455	0.399072	0.0716171	PF00571,PF01595,PF03471	PTHR22777	KOG2118			GO:0030554	AT1G55930.1		CBS domain-containing protein / transporter associated domain-containing protein
Glyma.20G182800.1	355.05	495.915	420.72	405.319	382.889	444.046	308.679	393.52	382.892	0.183484	-0.0454408	-0.228925	PF04048	PTHR14146			K06111	GO:0006904,GO:0015031,GO:0000145	AT3G10380.1	ATSEC8,SEC8	subunit of exocyst complex 8
Glyma.11G001100.1	479.825	759.19	841.44	1330.28	1420.5	1381.12	518.104	303.28	551.473	1.58962	0.989906	-0.599718	PF01535	PTHR24015					AT5G02860.1		Pentatricopeptide repeat (PPR) superfamily protein
Glyma.12G132500.1	93.3274	150.306	126.659	123.559	115.29	88.3833	103.224	78.1458	71.7363	0.370573	-0.178352	-0.548925	PF00201	PTHR11926,PTHR11926:SF77	KOG1192			GO:0016758,GO:0008152	AT5G54010.1		UDP-Glycosyltransferase superfamily protein
Glyma.09G029500.1	55.7936	56.4845	62.0008	60.0473	66.6355	72.4104	44.6641	26.9789	54.6989	0.65611	0.192045	-0.464064	PF11955						AT2G39120.1		Ubiquitin carboxyl-terminal hydrolase family protein
Glyma.11G243300.1	7.101	2.87209	7.97153	9.23804	3.17312	2.12972	6.94775	10.2334	3.58681	-0.514245	-0.303438	0.210806
Glyma.05G084600.1	130.861	59.3566	13.2859	239.034	150.194	106.486	242.179	178.619	141.679	-0.182285	1.28445	1.46674
Glyma.11G237000.1	161.294	125.415	147.916	154.737	129.04	117.135	73.4477	46.5154	78.9099	1.01144	-0.116487	-1.12792	PF00106	PTHR24322	KOG1209	1.1.1.101	K06123	GO:0016491,GO:0008152,GO:0003824,GO:0050662,GO:0044237	AT5G10050.1		NAD(P)-binding Rossmann-fold superfamily protein
Glyma.08G183500.1	1812.78	1873.56	1851.17	2550.85	2516.28	2529.04	4201.4	4507.34	4182.23	-0.763016	0.456035	1.21905	PF03083	PTHR10791	KOG1623			GO:0016021	AT5G13170.1	SAG29	senescence-associated gene 29
Glyma.13G346500.1	61.8802	51.6977	38.9719	46.1902	34.9043	41.5295	36.7238	39.0729	37.6616	0.112079	-0.315039	-0.427118	PF00566	PTHR22957,PTHR22957:SF26	KOG1092			GO:0005097,GO:0032313	AT2G30710.1		Ypt/Rab-GAP domain of gyp1p superfamily protein
Glyma.05G139700.1	592.426	782.167	836.125	508.092	617.7	624.007	756.312	678.194	779.236	-0.339297	-0.337326	0.00197155	PF07651	PTHR22951,PTHR22951:SF1	KOG0251			GO:0005543	AT2G01600.1		ENTH/ANTH/VHS superfamily protein
Glyma.04G099300.1	42.606	21.062	19.486	27.7141	14.8079	21.2972	35.7313	38.1426	34.9714	-0.770218	-0.381796	0.388422	PF10250						AT1G22460.1		O-fucosyltransferase family protein
Glyma.02G035200.1	47.6782	51.6977	45.172	128.178	108.944	130.978	121.089	105.125	79.8066	0.266465	1.34855	1.08208	PF07816						AT1G70420.1		Protein of unknown function (DUF1645)
Glyma.08G211900.1	460.551	379.116	478.292	348.736	429.428	393.998	390.067	373.053	347.024	0.0784253	-0.169133	-0.247559							AT5G25360.1
Glyma.20G154600.1	3.04329	3.82946	2.65718	4.61902	4.23082	3.19458	0.992536	0.930307	6.27693	0.55471	0.337828	-0.216881	PF01535	PTHR24015,PTHR24015:SF50					AT4G38010.1		Pentatricopeptide repeat (PPR-like) superfamily protein
Glyma.07G152200.1	64.9234	49.783	49.6007	49.6545	62.4046	36.2052	56.5745	53.0275	59.1824	-0.187011	-0.148223	0.038788	PF02630	PTHR12151	KOG2792		K07152	GO:0016209,GO:0016491,GO:0055114	AT3G08950.1		electron transport SCO1/SenC family protein
Glyma.14G056800.1	5851.22	4606.84	4626.15	9149.12	6799.99	5767.28	10450.4	7095.45	8579.66	-0.266676	0.525745	0.792421	PF00210	PTHR11431:SF8,PTHR11431	KOG2332			GO:0008199,GO:0006879	AT2G40300.1	ATFER4,FER4	ferritin 4
Glyma.16G175000.1	5.07214	4.78682	1.77145	1.15475	1.05771	1.06486	2.97761	5.58184	3.58681	-1.88992	-1.82731	0.0626098	PF08263,PF00560	PTHR24420:SF473,PTHR24420	KOG0472			GO:0005515	AT2G34930.1		disease resistance family protein / LRR family protein
Glyma.15G124100.1	283.026	201.047	217.889	153.582	163.944	152.275	186.597	147.919	224.176	-0.25	-0.579339	-0.329339	PF00999	PTHR10110	KOG1965			GO:0015299,GO:0006812,GO:0055085,GO:0016021	AT1G79610.1	ATNHX6,NHX6	Na+/H+ antiporter 6
Glyma.10G278800.1	35.505	20.1047	26.5718	9.23804	12.6925	17.0377	29.7761	40.9335	38.5583	-1.4875	-1.07651	0.410984	PF08661						AT4G18590.1		Nucleic acid-binding, OB-fold-like protein
Glyma.07G108500.1	242.448	278.593	256.861	327.95	342.697	354.598	262.029	229.786	234.04	0.498215	0.398308	-0.0999072	PF03647		KOG4267			GO:0016020	AT2G38550.1		Transmembrane proteins 14C
Glyma.19G109400.1	2393.04	2284.27	2092.08	2588.96	1436.36	1655.86	747.38	630.748	609.759	1.51496	-0.252836	-1.76779	PF00085	PTHR10438:SF7,PTHR10438	KOG0907			GO:0045454	AT1G08570.1	ACHT4	atypical CYS HIS rich thioredoxin 4
Glyma.02G099900.1	233.319	383.903	378.205	124.714	145.963	159.729	129.03	132.104	87.877	0.302428	-1.20962	-1.51205	PF01501	PTHR13778				GO:0016757	AT1G13250.1	GATL3	galacturonosyltransferase-like 3
Glyma.13G254200.1	37.5339	51.6977	31.8861	26.5594	25.3849	26.6215	21.8358	31.6304	17.9341	0.137971	-0.624437	-0.762407	PF01425	PTHR11895,PTHR11895:SF7	KOG1211			GO:0016884	AT5G64440.1	AtFAAH,FAAH	fatty acid amide hydrolase
Glyma.03G251900.1	45.6493	26.8062	40.7434	27.7141	19.0387	12.7783	48.6343	43.7244	58.2857	-1.33943	-0.927144	0.412287		PTHR13168					AT2G14045.1
Glyma.08G121600.1	13.1876	7.65892	7.08581	1.15475	2.11541	1.06486	3.97014	13.0243	0.896704	-2.04513	-2.68782	-0.642688							AT1G29530.1
Glyma.06G159100.1	17.2453	9.57365	17.7145	13.8571	19.0387	12.7783	3.97014	14.8849	19.7275	0.243427	0.0364857	-0.206941	PF05653	PTHR12570	KOG2922			GO:0016020,GO:0015095,GO:0015693	AT2G21120.1		Protein of unknown function (DUF803)
Glyma.09G052700.1	254.622	309.229	280.775	121.249	102.597	125.653	247.141	278.162	305.776	-1.24969	-1.27302	-0.0233258	PF02705					GO:0015079,GO:0071805,GO:0016020	AT2G35060.1	KUP11	K+ uptake permease 11
Glyma.11G195000.1	1.01443	1.91473	0.885726	1.15475	1.05771	3.19458	0.992536	0.930307	0.896704	0.939375	0.503199	-0.436176
Glyma.17G127100.1	1018.49	847.268	967.213	581.996	540.488	533.494	1466.97	1299.64	1397.06	-1.33017	-0.77463	0.555543	PF10602,PF01399	PTHR14145:SF1,PTHR14145	KOG0687		K03037	GO:0005515	AT4G24820.1		26S proteasome, regulatory subunit Rpn7;Proteasome component (PCI) domain
Glyma.18G049200.1	136.948	143.605	100.973	76.2138	80.3856	37.2701	161.783	129.313	150.646	-1.18812	-0.976693	0.211426	PF01196	PTHR14413,PTHR14413:SF9	KOG3280		K02879	GO:0003735,GO:0006412,GO:0005622,GO:0005840	AT3G54210.1		Ribosomal protein L17 family protein
Glyma.05G206900.1	29.4184	10.531	6.20008	8.08328	3.17312	6.38915	14.888	9.30307	17.9341	-1.25538	-1.38701	-0.131633	PF02798	PTHR11260:SF8,PTHR11260	KOG0867			GO:0005515	AT5G41210.1	ATGSTT1,GST10,GSTT1	glutathione S-transferase THETA 1
Glyma.05G073400.1	66.9523	48.8256	54.915	45.0354	55.0007	40.4646	76.4253	107.916	119.262	-1.11161	-0.280825	0.830781							AT5G40740.1
Glyma.04G210300.1	4.05771	0.957365	2.65718	2.30951	2.11541	2.12972	4.96268	3.72123	4.48352	-1.00639	-0.227135	0.77925
Glyma.13G255700.1	6.08657	1.91473	3.5429	5.77377	5.28853	10.6486	0.992536	1.86061	0.896704	2.53351	0.91125	-1.62226	PF00171	PTHR11699:SF27,PTHR11699	KOG2449			GO:0016491,GO:0008152,GO:0055114	AT2G14170.1	ALDH6B2	aldehyde dehydrogenase 6B2
Glyma.20G171800.1	77.0966	71.8024	96.5441	94.6899	89.905	120.329	97.2685	107.916	102.224	-0.0117071	0.313061	0.324768	PF01115	PTHR10619	KOG3174			GO:0003779,GO:0030036,GO:0008290,GO:0071203	AT1G71790.1		Subunits of heterodimeric actin filament capping protein Capz superfamily
Glyma.20G197000.1	1.01443	1.91473	1.77145	2.30951	1.05771	2.12972	3.97014	0.930307	5.38022	-0.903236	0.225779	1.12901	PF00847					GO:0003700,GO:0006355	AT4G13620.1		Integrase-type DNA-binding superfamily protein
Glyma.06G126600.1	141.006	183.814	169.174	91.2256	64.52	54.3078	164.761	132.104	143.473	-1.06785	-1.23373	-0.165883	PF00520,PF00027	PTHR10217,PTHR10217:SF7	KOG0498		K05391	GO:0005216,GO:0006811,GO:0055085,GO:0016020	AT5G53130.1	ATCNGC1,CNGC1	cyclic nucleotide gated channel 1
Glyma.10G230700.1	37.5339	17.2326	25.6861	24.2499	23.2695	18.1026	23.8209	11.1637	13.4506	0.438126	-0.293958	-0.732084	PF00249	PTHR12802:SF30,PTHR12802	KOG0724			GO:0003682	AT5G52660.1		Homeodomain-like superfamily protein
Glyma.08G314800.1	46.6637	44.0388	51.3721	35.7974	37.0197	43.6592	32.7537	38.1426	24.211	0.292409	-0.286612	-0.579021	PF00149	PTHR22953	KOG1378			GO:0016787	AT3G20500.1	ATPAP18,PAP18	purple acid phosphatase 18
Glyma.U021100.1	9.12986	4.78682	1.77145	4.61902	14.8079	10.6486	3.97014	2.79092	5.38022	1.30867	0.938914	-0.369752							AT5G60210.1	RIP5	ROP interactive partner 5
Glyma.04G098100.1	31.4473	67.9729	61.1151	54.2735	105.771	77.7347	125.06	57.6791	123.745	-0.366191	0.566729	0.93292	PF00097	PTHR22765:SF21,PTHR22765				GO:0046872,GO:0008270,GO:0004842,GO:0005680,GO:0005515	AT1G72200.1		RING/U-box superfamily protein
Glyma.13G349500.1	13.1876	10.531	15.9431	10.3928	25.3849	10.6486	10.9179	24.188	23.3143	-0.331524	0.227198	0.558722		PTHR10593					AT1G55110.1	AtIDD7,IDD7	indeterminate(ID)-domain 7
Glyma.19G224300.1	12.1731	23.9341	25.6861	18.4761	14.8079	21.2972	46.6492	66.9821	36.7649	-1.46229	-0.179048	1.28325	PF00190					GO:0045735	AT1G09560.1	GLP5	germin-like protein 5
Glyma.01G065500.1	5.07214	1.91473	1.77145	8.08328	4.23082	2.12972	0.992536	0.930307	3.58681	1.39042	0.721726	-0.668692	PF02897	PTHR11757,PTHR11757:SF3				GO:0004252,GO:0070008	AT1G69020.1		Prolyl oligopeptidase family protein
Glyma.08G161300.1	6.08657	1.91473	3.5429	5.77377	5.28853	2.12972	4.96268	4.65154	11.6571	-0.689247	0.192497	0.881744	PF02365					GO:0003677,GO:0006355	AT1G79580.1	ANAC033,SMB	NAC (No Apical Meristem) domain transcriptional regulator superfamily protein
Glyma.11G009500.1	1181.81	1537.53	1404.76	1277.16	1385.59	1364.08	863.506	687.497	995.341	0.66122	-0.0344316	-0.695651	PF00675,PF05193	PTHR11851,PTHR11851:SF34	KOG0959				AT5G42390.1		Insulinase (Peptidase family M16) family protein
Glyma.19G079900.1	22.3174	61.2713	46.9435	45.0354	89.905	84.1239	33.7462	20.4668	40.3517	1.21198	0.746948	-0.465033							AT2G36330.1		Uncharacterised protein family (UPF0497)
Glyma.03G050800.1	3.04329	6.70155	4.42863	8.08328	3.17312	13.8432	22.8283	14.8849	10.7604	-0.949539	0.82447	1.77401	PF03514						AT5G66770.1		GRAS family transcription factor
Glyma.08G074500.1	4.05771	6.70155	5.31436	5.77377	2.11541	4.25944	1.98507	2.79092	3.58681	0.538733	-0.403903	-0.942636	PF00560,PF00069,PF08263	PTHR24420:SF351,PTHR24420	KOG1187			GO:0004672,GO:0005524,GO:0006468,GO:0005515	AT4G33430.1	ATBAK1,ATSERK3,BAK1,ELG,RKS10,SERK3	BRI1-associated receptor kinase
Glyma.02G221300.1	6.08657	9.57365	5.31436	3.46426	7.40394	6.38915	3.97014	7.44246	4.48352	0.118537	-0.28143	-0.399967	PF00488	PTHR11361,PTHR11361:SF6				GO:0005524,GO:0030983,GO:0006298	AT5G54090.1		DNA mismatch repair protein MutS, type 2
Glyma.15G009900.1	12.1731	12.4457	9.74299	24.2499	26.4426	19.1675	16.8731	17.6758	13.4506	0.541446	1.02366	0.482211							AT1G80180.1
Glyma.08G158600.1	2667.95	1195.75	1404.76	1389.17	1192.03	1317.23	1197	1258.71	1052.73	0.152068	-0.434486	-0.586553		PTHR11328:SF24,PTHR11328	KOG4830				AT2G44280.1		Major facilitator superfamily protein
Glyma.18G300800.1	1.01443	3.82946	2.65718	1.15475	1.05771	1.06486	5.95522	1.86061	1.79341	-1.55191	-1.19458	0.357326	PF01190						AT5G13140.1		Pollen Ole e 1 allergen and extensin family protein
Glyma.02G095500.1	109.558	167.539	119.573	271.367	190.387	255.566	86.3506	85.5883	69.0462	1.57367	0.854678	-0.718996	PF01740,PF00916	PTHR11814:SF46,PTHR11814	KOG0236			GO:0015116,GO:0008272,GO:0016021	AT5G13550.1	SULTR4;1	sulfate transporter 4.1
Glyma.11G097500.1	2212.47	2579.14	2209	2239.07	1823.48	1721.88	3584.05	3181.65	3436.17	-0.818586	-0.275306	0.543281						GO:0005509	AT4G38810.2		Calcium-binding EF-hand family protein
Glyma.09G255500.1	1329.92	1279.04	1199.27	2967.72	2502.53	2092.45	1188.07	1068.92	1199.79	1.12947	0.989781	-0.139692	PF00673,PF00281	PTHR11994,PTHR11994:SF4	KOG0398		K02931	GO:0003735,GO:0006412,GO:0005840	AT4G01310.1		Ribosomal L5P family protein
Glyma.17G221700.1	44.6349	30.6357	40.7434	17.3213	8.46164	12.7783	17.8656	25.1183	16.1407	-0.616606	-1.58907	-0.972467							AT2G24970.1
Glyma.14G053800.1	126.804	116.798	106.287	189.38	132.213	169.313	135.977	125.591	76.2198	0.539324	0.488547	-0.050777							AT3G56250.1
Glyma.13G169200.1	213.03	173.283	190.431	368.367	275.003	323.717	162.776	120.94	172.167	1.08498	0.745715	-0.339268	PF01966	PTHR11373,PTHR11373:SF10	KOG2681			GO:0008081,GO:0046872	AT5G40270.1		HD domain-containing metal-dependent phosphohydrolase family protein
Glyma.13G229000.1	13.1876	6.70155	5.31436	2.30951	1.05771	2.12972	5.95522	15.8152	9.86374	-2.52479	-2.19692	0.327861	PF05097						AT1G29240.1		Protein of unknown function (DUF688)
Glyma.04G043700.1	1.01443	1.91473	0.885726	1.15475	1.05771	1.06486	1.98507	1.86061	0.896704	-0.533098	-0.219123	0.313975	PF02984,PF00134	PTHR10177:SF49,PTHR10177	KOG0654			GO:0005634	AT5G43080.1	CYCA3;1	Cyclin A3;1
Glyma.02G122800.1	6.08657	0.957365	1.77145	4.61902	3.17312	1.06486	5.95522	1.86061	2.69011	-0.246316	0.00679306	0.253109							AT2G03830.1	RGF8
Glyma.03G032000.1	26.3751	29.6783	16.8288	23.0951	20.0964	24.4918	27.791	51.1669	28.6945	-0.66951	-0.106768	0.562741	PF00036					GO:0005509	AT1G73440.1		calmodulin-related
Glyma.05G141600.1	1.01443	1.91473	0.885726	1.15475	1.05771	1.06486	0.992536	2.79092	0.896704	-0.514042	-0.219123	0.294919							AT5G19875.1
Glyma.13G237700.1	14215.2	9787.14	7423.27	25003.9	23154.2	21958.5	26186.1	24388.9	20485.2	-0.0192859	1.15782	1.1771		PTHR23241					AT4G21020.1		Late embryogenesis abundant protein (LEA) family protein
Glyma.U008200.1	7.101	9.57365	23.9146	8.08328	9.51935	7.45401	1.98507	1.86061	2.69011	1.93876	-0.695904	-2.63466	PF09366						AT5G39530.1		Protein of unknown function (DUF1997)
Glyma.14G031300.1	48.6926	45.9535	30.1147	9.23804	20.0964	12.7783	34.7388	41.8638	40.3517	-1.47362	-1.56684	-0.0932201	PF00651,PF12313,PF11900		KOG0512			GO:0005515	AT5G45110.1	ATNPR3,NPR3	NPR1-like protein 3
Glyma.15G149300.1	280.997	413.582	389.719	420.331	493.949	488.77	443.664	317.235	373.925	0.306098	0.371805	0.0657073	PF00400	PTHR19923	KOG0285		K12862	GO:0005515	AT4G15900.1	PRL1	pleiotropic regulatory locus 1
Glyma.05G201900.1	21.303	13.4031	15.9431	8.08328	5.28853	5.3243	1.98507	22.3274	14.3473	-1.04809	-1.4378	-0.389708	PF06217						AT2G21240.1	ATBPC4,BBR,BPC4	basic pentacysteine 4
Glyma.14G074400.1	14.202	10.531	15.0573	9.23804	5.28853	3.19458	3.97014	10.2334	11.6571	-0.545288	-1.16695	-0.621659	PF02545					GO:0005737	AT5G42770.2		Maf-like protein
Glyma.05G147800.1	474.753	501.659	537.636	486.152	567.988	516.457	749.365	654.006	737.09	-0.446609	0.052902	0.499511	PF00400,PF12265	PTHR22850:SF6,PTHR22850	KOG0302			GO:0005515	AT2G19540.1		Transducin family protein / WD-40 repeat family protein
Glyma.16G066300.1	85.212	122.543	91.2298	71.5948	76.1548	67.0861	135.977	115.358	168.58	-0.966866	-0.476837	0.49003	PF01535	PTHR24015					AT3G46610.1		Pentatricopeptide repeat (PPR-like) superfamily protein
Glyma.02G168200.1	1.01443	1.91473	0.885726	3.46426	1.05771	2.12972	0.992536	2.79092	1.79341	0.254266	0.802081	0.547815
Glyma.13G106900.1	72.0244	68.9303	87.6869	50.8092	43.3659	34.0755	40.694	104.194	74.4264	-0.774037	-0.834122	-0.0600846	PF00069	PTHR24360,PTHR24360:SF39	KOG0581	2.7.12.2	K04368	GO:0004672,GO:0005524,GO:0006468	AT4G29810.1	ATMKK2,MK1,MKK2	MAP kinase kinase 2
Glyma.17G004800.1	588.369	326.461	449.949	1226.35	1522.04	1535.53	654.081	547.951	670.734	1.19376	1.65026	0.456504	PF00270,PF00271	PTHR24031,PTHR24031:SF47	KOG0333	3.6.4.13	K12858	GO:0003676,GO:0005524,GO:0008026,GO:0004386	AT2G33730.1		P-loop containing nucleoside triphosphate hydrolases superfamily protein
Glyma.13G065200.1	1.01443	0.957365	0.885726	1.15475	1.05771	1.06486	0.992536	0.930307	0.896704	0.217053	0.197753	-0.0193
Glyma.05G248300.1	1.01443	0.957365	2.65718	1.15475	8.46164	1.06486	10.9179	6.51215	1.79341	-0.847786	1.20632	2.0541		PTHR10593	KOG2462			GO:0046872	AT2G01940.1	ATIDD15,SGR5	C2H2-like zinc finger protein
Glyma.10G098600.1	2.02886	2.87209	0.885726	3.46426	5.28853	1.06486	5.95522	0.930307	0.896704	0.335195	0.762643	0.427448							ATMG01060.1
Glyma.08G040100.1	31.4473	46.9109	50.4864	70.44	59.2315	43.6592	24.8134	34.4214	29.5912	0.964474	0.427896	-0.536578	PF04083	PTHR11005	KOG2624			GO:0006629	AT1G73920.1		alpha/beta-Hydrolases superfamily protein
Glyma.02G003800.1	2.02886	7.65892	2.65718	3.46426	7.40394	7.45401	11.9104	7.44246	4.48352	-0.379573	0.569673	0.949245							AT4G14310.1		Transducin/WD40 repeat-like superfamily protein
Glyma.05G120200.1	2.02886	1.91473	7.97153	11.5475	5.28853	4.25944	2.97761	2.79092	0.896704	1.66221	0.824142	-0.838066
Glyma.05G167300.1	214.044	312.101	228.517	424.95	445.294	520.716	453.589	333.98	468.976	0.146618	0.882177	0.735559	PF07766	PTHR14009:SF1,PTHR14009	KOG1043				AT3G59820.1		LETM1-like protein
Glyma.12G159100.1	3.04329	3.82946	5.31436	10.3928	7.40394	6.38915	2.97761	4.65154	2.69011	1.22883	0.98881	-0.240016							AT2G26260.1	3BETAHSD/D2,AT3BETAHSD/D2	3beta-hydroxysteroid-dehydrogenase/decarboxylase isoform 2
Glyma.04G203200.1	134.919	202.004	148.802	157.047	160.771	172.507	282.873	256.765	302.189	-0.779785	0.013599	0.793384	PF08030,PF08022,PF08414,PF01794	PTHR11972:SF5,PTHR11972	KOG0039	1.11.1.-,1.6.3.-	K13447	GO:0016491,GO:0055114,GO:0004601,GO:0050664	AT5G47910.1	ATRBOHD,RBOHD	respiratory burst oxidase homologue D
Glyma.11G129500.1	1.01443	0.957365	0.885726	1.15475	1.05771	1.06486	0.992536	0.930307	0.896704	0.217053	0.197753	-0.0193	PF00232	PTHR10353	KOG0626	3.2.1.21	K01188	GO:0004553,GO:0005975	AT5G44640.1	BGLU13	beta glucosidase 13
Glyma.06G159400.1	191.727	224.023	226.746	168.594	194.618	212.972	144.91	155.361	138.092	0.3944	-0.157159	-0.551559	PF00009,PF06421,PF03144,PF00679	PTHR23115,PTHR23115:SF40	KOG0462		K03596	GO:0003924,GO:0005525	AT5G08650.1		Small GTP-binding protein
Glyma.07G186100.1	90.2842	61.2713	77.0582	43.8807	48.6545	48.9835	37.7164	38.1426	26.0044	0.474357	-0.691919	-1.16628	PF01063	PTHR11825:SF2,PTHR11825	KOG0975	2.6.1.42	K00826	GO:0003824,GO:0008152	AT1G50090.1		D-aminoacid aminotransferase-like PLP-dependent enzymes superfamily protein
Glyma.12G025500.1	445.334	313.058	294.947	282.915	291.927	247.047	386.096	411.196	379.306	-0.517606	-0.357955	0.159651							AT1G76200.1
Glyma.20G152800.1	4.05771	1.91473	2.65718	12.7023	16.9233	5.3243	17.8656	4.65154	10.7604	0.0707353	2.01792	1.94718	PF00069	PTHR24420:SF440,PTHR24420	KOG0583			GO:0004672,GO:0005524,GO:0006468	AT4G25390.1		Protein kinase superfamily protein
Glyma.04G103900.1	257.665	205.833	283.432	460.747	552.122	441.917	447.634	393.52	396.343	0.233382	0.961761	0.728379	PF00847					GO:0003700,GO:0006355	AT1G78080.1	RAP2.4	related to AP2 4
Glyma.15G044300.1	10.1443	4.78682	0.885726	3.46426	3.17312	3.19458	2.97761	0.930307	2.69011	0.575444	-0.68591	-1.26135	PF08423	PTHR22942,PTHR22942:SF15	KOG1433		K10869		AT2G28560.1	ATRAD51B,RAD51B	DNA repair (Rad51) family protein
Glyma.06G157200.1	139.991	187.643	133.745	125.868	111.059	140.561	53.5969	86.5186	52.9055	0.967676	-0.28952	-1.2572	PF02140,PF01301	PTHR23421,PTHR23421:SF34	KOG0496			GO:0004553,GO:0005975,GO:0030246,GO:0004565,GO:0009341	AT5G63810.1	BGAL10	beta-galactosidase 10
Glyma.14G182300.1	2.02886	5.74419	1.77145	6.92853	5.28853	3.19458	9.92536	2.79092	1.79341	0.0870033	0.691279	0.604275		PTHR21736:SF13,PTHR21736					AT4G30200.3	VEL1	vernalization5/VIN3-like
Glyma.04G095300.1	38.5483	54.5698	51.3721	118.94	112.117	101.162	31.7611	26.0486	45.7319	1.68192	1.20116	-0.48076	PF00249					GO:0003682	AT1G58220.1		Homeodomain-like superfamily protein
Glyma.12G022200.1	223.174	288.167	284.318	306.01	243.272	302.42	229.276	174.898	234.04	0.416311	0.0981987	-0.318112	PF01529	PTHR22883	KOG1311			GO:0008270	AT4G15080.1		DHHC-type zinc finger family protein
Glyma.17G245700.1	490.984	374.33	383.519	357.974	423.082	390.803	339.447	429.802	390.963	0.0144111	-0.0917803	-0.106191	PF00860	PTHR11119,PTHR11119:SF8	KOG1292			GO:0005215,GO:0006810,GO:0055085,GO:0016020	AT2G26510.1	PDE135	Xanthine/uracil permease family protein
Glyma.07G098400.1	1.01443	1.91473	4.42863	6.92853	5.28853	4.25944	5.95522	3.72123	1.79341	0.522562	1.16307	0.640503	PF00009	PTHR23115:SF41,PTHR23115				GO:0003924,GO:0005525	AT4G11160.1		Translation initiation factor 2, small GTP-binding protein
Glyma.08G189200.1	10.1443	35.4225	30.1147	21.9403	25.3849	29.8161	44.6641	42.7941	42.1451	-0.748527	0.027564	0.776091	PF01477,PF00305	PTHR11771,PTHR11771:SF2				GO:0016702,GO:0046872,GO:0055114,GO:0005515	AT1G55020.1	ATLOX1,LOX1	lipoxygenase 1
Glyma.12G009900.1	133.905	67.9729	109.83	118.94	110.001	91.5779	176.671	209.319	144.369	-0.726562	0.040217	0.766779							AT3G52040.1
Glyma.20G056500.1	66.9523	78.5039	46.9435	47.3449	47.5968	44.7241	47.6417	56.7487	57.389	-0.21205	-0.462128	-0.250078							AT1G35220.1
Glyma.07G036200.1	413.887	255.616	269.261	124.714	105.771	135.237	265.007	339.562	292.325	-1.29419	-1.36002	-0.065824	PF02045	PTHR12632:SF5,PTHR12632	KOG1561			GO:0003700,GO:0006355	AT1G72830.1	ATHAP2C,HAP2C,NF-YA3	nuclear factor Y, subunit A3
Glyma.05G020500.1	23.3319	24.8915	21.2574	10.3928	12.6925	23.4269	14.888	10.2334	19.7275	0.0525353	-0.579006	-0.631541	PF03009	PTHR23344	KOG2258	3.1.4.46	K01126	GO:0008889,GO:0006071	AT1G74210.1		PLC-like phosphodiesterases superfamily protein
Glyma.12G146700.1	14.202	10.531	11.5144	25.4046	16.9233	12.7783	6.94775	4.65154	10.7604	1.30131	0.604335	-0.696977	PF00609,PF00781	PTHR11255:SF1,PTHR11255				GO:0004143,GO:0007205	AT2G20900.2	ATDGK5,DGK5	diacylglycerol kinase 5
Glyma.02G310300.1	10.1443	0.957365	5.31436	2.30951	4.23082	1.06486	2.97761	4.65154	8.07033	-1.04566	-1.11005	-0.0643868
Glyma.03G082400.1	18.2597	15.3178	16.8288	18.4761	8.46164	11.7135	17.8656	9.30307	11.6571	-0.00650601	-0.383093	-0.376587	PF00249	PTHR10641	KOG0048			GO:0003682	AT5G02320.1	ATMYB3R5,MYB3R-5	myb domain protein 3r-5
Glyma.19G095500.1	30.4329	31.593	26.5718	26.5594	38.0774	36.2052	27.791	12.094	27.7978	0.575235	0.186755	-0.388479	PF01535	PTHR24015					AT5G14080.1		Tetratricopeptide repeat (TPR)-like superfamily protein
Glyma.05G228700.1	306.357	478.682	471.206	591.234	681.162	916.844	278.903	264.207	338.954	1.31148	0.801311	-0.510164	PF00069	PTHR11909,PTHR11909:SF18	KOG1163	2.7.1.-	K00924	GO:0004672,GO:0005524,GO:0006468	AT4G28880.1	ckl3	casein kinase I-like 3
Glyma.03G173000.1	1.01443	3.82946	1.77145	2.30951	7.40394	7.45401	0.992536	2.79092	0.896704	1.87505	1.37579	-0.499257	PF03372	PTHR11200:SF29,PTHR11200	KOG0565				AT2G37440.1		DNAse I-like superfamily protein
Glyma.04G170600.1	1.01443	0.957365	0.885726	1.15475	1.05771	5.3243	3.97014	0.930307	4.48352	-0.316255	1.39918	1.71543	PF03634	PTHR11584:SF275,PTHR11584					AT3G47620.1	AtTCP14,TCP14	TEOSINTE BRANCHED, cycloidea and PCF (TCP) 14
Glyma.16G092900.1	2.02886	9.57365	4.42863	3.46426	2.11541	13.8432	216.373	300.489	268.114	-5.33682	0.276878	5.6137	PF07059	PTHR12136:SF13,PTHR12136					AT4G19040.2	EDR2	ENHANCED DISEASE RESISTANCE 2
Glyma.19G090000.1	188.684	195.302	168.288	475.759	558.469	358.858	429.768	332.12	340.747	0.337328	1.33483	0.997499	PF01165					GO:0003735,GO:0006412,GO:0005622,GO:0005840	AT3G27160.1	GHS1	Ribosomal protein S21 family protein
Glyma.10G296100.1	1.01443	0.957365	0.885726	1.15475	1.05771	1.06486	0.992536	0.930307	0.896704	0.217053	0.197753	-0.0193	PF00083	PTHR24064:SF85,PTHR24064	KOG0254			GO:0022857,GO:0055085,GO:0016021	AT2G43330.1	ATINT1,INT1	inositol transporter 1
Glyma.11G151300.1	419.973	261.361	279.889	287.534	320.485	239.593	449.619	278.162	368.545	-0.371201	-0.181468	0.189733	PF01016	PTHR15893	KOG4600			GO:0003735,GO:0006412,GO:0005622,GO:0005840	AT5G40950.1	RPL27	ribosomal protein large subunit 27
Glyma.13G366700.1	24.3463	33.5078	40.7434	21.9403	22.2118	29.8161	33.7462	21.3971	26.9011	-0.149499	-0.414645	-0.265146	PF05699,PF02892	PTHR10775,PTHR10775:SF11	KOG1121			GO:0003677,GO:0046983	AT3G42170.1		BED zinc finger ;hAT family dimerisation domain
Glyma.20G157800.1	73.0389	72.7597	51.3721	41.5712	56.0584	55.3727	92.3058	66.9821	84.2901	-0.670832	-0.365892	0.304939		PTHR13047	KOG1689		K14397	GO:0003729,GO:0006378,GO:0005849	AT4G25550.1		Cleavage/polyadenylation specificity factor, 25kDa subunit
Glyma.15G206900.1	22.3174	5.74419	6.20008	4.61902	4.23082	6.38915	15.8806	16.7455	3.58681	-1.24874	-1.16883	0.0799077
Glyma.08G142900.1	52.7503	45.9535	62.8865	130.487	102.597	94.7725	55.582	59.5397	52.0088	0.972093	1.02073	0.0486339	PF07137						AT2G21860.1		violaxanthin de-epoxidase-related
Glyma.18G014100.1	77.0966	71.8024	66.4295	39.2617	40.1928	47.9187	65.5074	80.0064	65.4594	-0.727999	-0.757478	-0.029479	PF04724	PTHR12224		2.4.1.144	K00737	GO:0003830,GO:0006487,GO:0016020	AT1G12990.1		beta-1,4-N-acetylglucosaminyltransferase family protein
Glyma.04G071000.1	1.01443	0.957365	0.885726	1.15475	1.05771	1.06486	0.992536	0.930307	0.896704	0.217053	0.197753	-0.0193	PF03171	PTHR10209:SF55,PTHR10209	KOG0143			GO:0016491,GO:0016706,GO:0055114	AT1G15550.1	ATGA3OX1,GA3OX1,GA4	gibberellin 3-oxidase 1
Glyma.12G085700.1	4.05771	4.78682	3.5429	6.92853	10.5771	5.3243	5.95522	3.72123	4.48352	0.689106	0.882045	0.192939							AT2G29880.1
Glyma.13G152400.1	145.063	119.671	116.916	83.1423	97.3089	118.199	92.3058	82.7974	82.4967	0.213327	-0.35379	-0.567117	PF00023	PTHR24198,PTHR24198:SF302				GO:0005515	AT5G40160.1	EMB139,EMB506	Ankyrin repeat family protein
Glyma.09G174900.1	32.4617	31.593	24.8003	25.4046	26.4426	17.0377	45.6567	35.3517	34.9714	-0.751612	-0.367265	0.384347	PF01263	PTHR10091				GO:0016853,GO:0005975	AT3G17940.1		Galactose mutarotase-like superfamily protein
Glyma.04G184400.1	14.202	6.70155	10.6287	6.92853	7.40394	13.8432	1.98507	8.37277	6.27693	0.760247	-0.162381	-0.922628	PF02151,PF04379	PTHR14289:SF12,PTHR14289				GO:0005515	AT1G06110.1	SKIP16	SKP1/ASK-interacting protein 16
Glyma.U017800.1	7.101	24.8915	16.8288	10.3928	19.0387	17.0377	10.9179	10.2334	16.1407	0.317412	-0.071234	-0.388646
Glyma.16G119000.1	3591.08	4312.93	3689.05	4930.8	4581.98	4421.3	3538.39	2447.64	3185.99	0.603307	0.265357	-0.33795	PF03088	PTHR10426:SF19,PTHR10426	KOG1520			GO:0016844,GO:0009058	AT3G51430.1	SSL5,YLS2	Calcium-dependent phosphotriesterase superfamily protein
Glyma.19G152100.1	24.3463	15.3178	14.1716	3.46426	2.11541	4.25944	2.97761	2.79092	4.48352	-0.0593121	-2.45196	-2.39265	PF07714	PTHR24420:SF794,PTHR24420	KOG1187			GO:0004672,GO:0005524,GO:0006468	AT5G35960.1		Protein kinase family protein
Glyma.10G016400.1	143.034	101.481	85.0297	233.26	237.984	203.388	246.149	259.556	190.101	-0.0445833	1.03363	1.07821	PF01280	PTHR10722	KOG1696		K02885	GO:0003735,GO:0006412,GO:0005622,GO:0005840	AT3G16780.1		Ribosomal protein L19e family protein
Glyma.01G119500.1	127.818	135.946	146.145	255.201	192.502	201.258	120.097	157.222	147.956	0.609737	0.662831	0.0530934	PF00962	PTHR11359	KOG1096	3.5.4.6	K01490	GO:0019239,GO:0009168	AT2G38280.1	ATAMPD,FAC1	AMP deaminase, putative / myoadenylate deaminase, putative
Glyma.06G119300.1	7.101	22.9768	10.6287	4.61902	3.17312	2.12972	14.888	14.8849	17.9341	-2.26552	-2.03658	0.228944	PF07714,PF07645	PTHR24420,PTHR24420:SF444	KOG1187			GO:0005515,GO:0004672,GO:0005524,GO:0006468,GO:0005509,GO:0030247	AT1G21240.1	WAK3	wall associated kinase 3
Glyma.01G004300.1	830.817	728.555	760.839	1210.18	997.416	872.12	1168.21	1150.79	1056.32	-0.132226	0.408543	0.540769	PF01198	PTHR10956	KOG0893		K02910	GO:0003735,GO:0006412,GO:0005622,GO:0005840	AT2G19740.1		Ribosomal protein L31e family protein
Glyma.13G212200.1	103.472	109.14	79.7153	203.237	195.676	176.767	153.843	159.083	148.853	0.318064	0.977683	0.659619		PTHR10044:SF81,PTHR10044	KOG4172				AT4G03000.1		RING/U-box superfamily protein
Glyma.01G151800.1	22.3174	44.0388	42.5149	45.0354	50.7699	40.4646	19.8507	32.5608	26.0044	0.79725	0.323847	-0.473403	PF01373,PF05687					GO:0016161,GO:0000272	AT5G45300.1	BAM8,BMY2	beta-amylase 2
Glyma.07G064400.1	1337.02	1258.93	1251.53	230.951	138.559	129.913	564.753	431.663	546.093	-1.62694	-2.94558	-1.31864	PF05056						AT5G01150.1		Protein of unknown function (DUF674)
Glyma.05G008200.1	1.01443	3.82946	1.77145	1.15475	2.11541	1.06486	3.97014	1.86061	3.58681	-1.11931	-0.609775	0.50954	PF01177					GO:0036361,GO:0006807	AT1G15410.1		aspartate-glutamate racemase family
Glyma.17G074700.1	79.1254	93.8217	84.144	84.2971	101.54	93.7076	68.485	64.1912	60.0791	0.536307	0.120798	-0.415509	PF03031,PF00533	PTHR23081				GO:0005515	AT5G58003.1	CPL4	C-terminal domain phosphatase-like 4
Glyma.12G063000.1	81.1543	68.9303	73.5153	49.6545	57.1161	46.8538	63.5223	71.6337	74.4264	-0.44811	-0.541512	-0.0934017	PF02953	PTHR10898	KOG3479				AT3G46560.1	emb2474,TIM9	Tim10/DDP family zinc finger protein
Glyma.03G189800.1	41.5916	67.9729	46.9435	75.0591	87.7896	75.605	62.5298	34.4214	78.9099	0.439273	0.607473	0.1682	PF00069,PF00560,PF08263	PTHR24420:SF922,PTHR24420	KOG1187			GO:0004672,GO:0005524,GO:0006468,GO:0005515	AT2G36570.1		Leucine-rich repeat protein kinase family protein
Glyma.18G155000.1	5.07214	4.78682	2.65718	3.46426	2.11541	9.58373	0.992536	1.86061	2.69011	1.45179	0.276804	-1.17498	PF02362					GO:0003677	AT3G18990.1	REM39,VRN1	AP2/B3-like transcriptional factor family protein
Glyma.02G160400.1	4.05771	6.70155	4.42863	8.08328	3.17312	5.3243	2.97761	15.8152	13.4506	-0.959499	0.126582	1.08608	PF01535	PTHR24015:SF47,PTHR24015					AT2G29760.1	OTP81	Tetratricopeptide repeat (TPR)-like superfamily protein
Glyma.04G180000.1	637.061	661.539	595.208	189.38	215.772	270.474	240.194	353.517	191.895	-0.21758	-1.48699	-1.26941	PF00860	PTHR11119,PTHR11119:SF8	KOG1292			GO:0005215,GO:0006810,GO:0055085,GO:0016020	AT5G62890.1		Xanthine/uracil permease family protein
Glyma.17G059800.1	143.034	167.539	155.888	94.6899	116.348	144.821	127.045	140.476	153.336	-0.242028	-0.390454	-0.148425	PF00082,PF02225,PF05922,PF06280	PTHR10795,PTHR10795:SF17				GO:0004252,GO:0006508,GO:0042802,GO:0043086,GO:0005618,GO:0016020	AT4G30020.1		PA-domain containing subtilase family protein
Glyma.09G050600.1	8.11543	29.6783	25.6861	6.92853	8.46164	10.6486	3.97014	5.58184	12.5539	0.236233	-1.28564	-1.52187	PF00324	PTHR11785,PTHR11785:SF53	KOG1286			GO:0006810,GO:0055085,GO:0016020,GO:0015171,GO:0003333	AT2G34960.1	CAT5	cationic amino acid transporter 5
Glyma.10G084500.1	262.737	321.675	332.147	217.094	244.33	297.096	365.253	430.732	440.282	-0.704732	-0.273041	0.431691	PF00097	PTHR22764,PTHR22764:SF49	KOG1493			GO:0046872,GO:0008270,GO:0005515	AT5G22000.2	RHF2A	RING-H2 group F2A
Glyma.17G210800.1	3.04329	4.78682	1.77145	3.46426	1.05771	2.12972	7.94029	0.930307	4.48352	-1.00549	-0.529549	0.475943							AT5G25360.1
Glyma.04G179400.1	266.795	181.899	141.716	160.511	121.636	141.626	112.157	116.288	153.336	0.150546	-0.478425	-0.628971	PF04134						AT5G50100.1		Putative thiol-disulphide oxidoreductase DCC
Glyma.15G136500.1	17.2453	5.74419	2.65718	8.08328	4.23082	4.25944	7.94029	0.930307	2.69011	0.519653	-0.629889	-1.14954	PF00955	PTHR11453,PTHR11453:SF6				GO:0006820,GO:0016021	AT3G62270.1		HCO3- transporter family
Glyma.01G227200.1	68.9812	64.1434	74.401	38.1069	26.4426	53.243	48.6343	61.4003	59.1824	-0.522627	-0.817041	-0.294415	PF00642,PF00076	PTHR24009				GO:0003676,GO:0046872	AT5G12440.1		CCCH-type zinc fingerfamily protein with RNA-binding domain
Glyma.15G026900.1	3.04329	6.70155	4.42863	11.5475	15.8656	15.9729	3.97014	9.30307	4.48352	1.28886	1.61404	0.325173							AT1G72790.1		hydroxyproline-rich glycoprotein family protein
Glyma.03G188900.1	82.1687	65.1008	75.2867	55.4282	51.8276	53.243	78.4103	50.2366	52.0088	-0.170681	-0.471608	-0.300927	PF00632	PTHR11254:SF145,PTHR11254	KOG4427			GO:0004842	AT3G53090.1	UPL7	ubiquitin-protein ligase 7
Glyma.14G098100.1	293.17	227.853	288.747	550.818	551.065	601.645	267.985	192.574	311.156	1.14239	1.07294	-0.0694439	PF02431					GO:0016872	AT2G26310.1		Chalcone-flavanone isomerase family protein
Glyma.18G283900.1	20.2886	18.1899	29.229	38.1069	17.981	24.4918	24.8134	16.7455	18.8308	0.416113	0.251101	-0.165012	PF08797,PF08774	PTHR15749:SF6,PTHR15749	KOG2143			GO:0016788,GO:0003676,GO:0008270,GO:0016818	AT1G48360.2		zinc ion binding;nucleic acid binding;hydrolases, acting on acid anhydrides, in phosphorus-containing anhydrides
Glyma.05G095400.1	6.08657	4.78682	15.9431	3.46426	6.34623	2.12972	33.7462	40.9335	38.5583	-3.24546	-1.16729	2.07817	PF00210	PTHR11431:SF8,PTHR11431				GO:0008199,GO:0006879	AT3G11050.1	ATFER2,FER2	ferritin 2
Glyma.13G350200.1	10.1443	4.78682	5.31436	3.46426	6.34623	1.06486	4.96268	2.79092	2.69011	0.0584281	-0.896536	-0.954964							AT3G06895.1
Glyma.16G179000.1	1.01443	0.957365	0.885726	1.15475	2.11541	1.06486	0.992536	2.79092	1.79341	-0.363414	0.601277	0.964691	PF00295					GO:0004650,GO:0005975	AT3G61490.1		Pectin lyase-like superfamily protein
Glyma.11G099800.1	11.1587	15.3178	10.6287	23.0951	14.8079	13.8432	24.8134	30.7001	16.1407	-0.4696	0.479827	0.949428	PF00098,PF07962	PTHR13220,PTHR13220:SF1	KOG3004			GO:0003676,GO:0008270,GO:0006974,GO:0007049,GO:0048478,GO:0005634	AT3G02820.1		zinc knuckle (CCHC-type) family protein
Glyma.19G002700.1	33.4761	44.0388	30.1147	38.1069	28.5581	21.2972	50.6193	55.8184	53.8022	-0.86528	-0.29112	0.574159							AT3G01640.1	ATGLCAK,GLCAK	glucuronokinase G
Glyma.10G077900.1	15.2164	8.61628	4.42863	6.92853	5.28853	9.58373	11.9104	5.58184	23.3143	-0.904421	-0.37445	0.529971	PF03134	PTHR12300,PTHR12300:SF20	KOG1726				AT2G36020.1	HVA22J	HVA22-like protein J
Glyma.08G042900.1	110.573	143.605	126.659	158.201	125.867	132.043	98.2611	109.776	118.365	0.350317	0.127797	-0.22252	PF00789,PF09409	PTHR23153,PTHR23153:SF2	KOG2699		K14011	GO:0005515	AT2G01650.1	PUX2	plant UBX domain-containing protein 2
Glyma.09G107000.1	152.164	137.861	147.916	196.308	248.561	176.767	171.709	217.692	182.928	0.119227	0.505333	0.386106	PF00628,PF12165	PTHR23123	KOG1632			GO:0005515,GO:0042393,GO:0006355	AT5G05610.1	AL1	alfin-like 1
Glyma.07G200400.1	480.839	356.14	439.32	598.163	594.431	540.948	383.119	364.68	315.64	0.704985	0.441756	-0.263229							AT5G64680.1
Glyma.11G167200.1	5.07214	5.74419	5.31436	8.08328	6.34623	13.8432	10.9179	3.72123	8.07033	0.316116	0.809601	0.493485	PF00515	PTHR23083,PTHR23083:SF141				GO:0005515	AT3G51770.2	ATEOL1,ETO1	tetratricopeptide repeat (TPR)-containing protein
Glyma.16G026500.1	656.335	406.88	395.034	280.605	328.946	268.344	396.022	458.642	363.165	-0.472188	-0.732115	-0.259927
Glyma.05G024300.1	78.111	57.4419	70.8581	51.964	51.8276	50.0484	33.7462	39.0729	42.1451	0.420245	-0.42409	-0.844335	PF01844					GO:0003676,GO:0004519	AT1G18680.1		HNH endonuclease domain-containing protein
Glyma.15G125300.1	1167.61	908.539	920.269	688.234	729.817	621.878	1234.71	1235.45	1132.54	-0.82056	-0.554719	0.26584	PF00241	PTHR11913	KOG1735		K05765	GO:0003779,GO:0005622	AT5G59880.1	ADF3	actin depolymerizing factor 3
Glyma.01G078600.1	6.08657	6.70155	3.5429	6.92853	2.11541	3.19458	8.93282	2.79092	1.79341	-0.143362	-0.416187	-0.272824	PF04640						AT3G60670.1		PLATZ transcription factor family protein
Glyma.02G105900.1	16.2309	26.8062	28.3432	15.0118	31.7312	27.6863	32.7537	9.30307	38.5583	-0.115178	0.0603449	0.175523	PF03634	PTHR11584:SF275,PTHR11584					AT1G69690.1		TCP family transcription factor
Glyma.01G127400.1	1.01443	0.957365	0.885726	1.15475	1.05771	4.25944	1.98507	3.72123	2.69011	-0.375584	1.17943	1.55501	PF03018	PTHR21495					AT1G58170.1		Disease resistance-responsive (dirigent-like protein) family protein
Glyma.16G153000.1	152.164	104.353	103.63	83.1423	98.3666	87.3184	88.3357	61.4003	73.5297	0.267919	-0.421906	-0.689824		PTHR11122:SF9,PTHR11122					AT1G55370.2	NDF5	NDH-dependent cyclic electron flow 5
Glyma.12G225200.1	10.1443	23.9341	11.5144	26.5594	27.5003	22.362	4.96268	9.30307	3.58681	2.09785	0.745176	-1.35268	PF05678						AT1G28280.2		VQ motif-containing protein
Glyma.13G030500.1	287.083	270.934	216.117	166.285	129.04	170.377	240.194	262.347	208.035	-0.60958	-0.733177	-0.123596	PF00026	PTHR13683,PTHR13683:SF98	KOG1339			GO:0004190,GO:0006508	AT1G77480.1		Eukaryotic aspartyl protease family protein
Glyma.17G028800.1	201.871	211.578	166.516	336.034	360.678	264.085	242.179	152.57	217.002	0.651285	0.728264	0.0769788							AT3G06790.2		plastid developmental protein DAG, putative
Glyma.15G215400.1	22.3174	45.9535	77.0582	39.2617	25.3849	30.8809	26.7985	16.7455	19.7275	0.594361	-0.605335	-1.1997	PF00122,PF00702	PTHR24092,PTHR24092:SF14	KOG0206			GO:0000166,GO:0046872	AT5G04930.1	ALA1	aminophospholipid ATPase 1
Glyma.06G263300.1	18.2597	11.4884	20.3717	8.08328	8.46164	8.51887	12.903	8.37277	7.17363	-0.182791	-0.999775	-0.816984							AT5G54585.1
Glyma.14G177200.1	18.2597	25.8488	15.9431	10.3928	6.34623	17.0377	9.92536	16.7455	8.96704	-0.077382	-0.830172	-0.75279	PF00141			1.11.1.11	K00434	GO:0004601,GO:0020037,GO:0006979,GO:0055114	AT4G09010.1	APX4,TL29	ascorbate peroxidase 4
Glyma.04G046800.1	28.404	29.6783	11.5144	23.0951	26.4426	28.7512	9.92536	13.9546	12.5539	1.10353	0.169788	-0.933742							AT1G10140.1		Uncharacterised conserved protein UCP031279
Glyma.09G260100.1	52.7503	71.8024	56.6865	30.0236	29.6158	47.9187	62.5298	77.2155	69.0462	-0.956947	-0.752779	0.204168	PF05687,PF01373					GO:0016161,GO:0000272	AT2G45880.1	BAM7,BMY4	beta-amylase 7
Glyma.18G023900.1	6.08657	12.4457	1.77145	1.15475	3.17312	4.25944	0.992536	1.86061	0.896704	1.19537	-1.24147	-2.43684	PF00176,PF00271	PTHR10799:SF41,PTHR10799	KOG0390			GO:0003677,GO:0005524,GO:0003676,GO:0004386,GO:0016787	AT3G42670.1	CHR38,CLSY	chromatin remodeling 38
Glyma.03G242300.1	75.0677	68.9303	46.0578	96.9994	122.694	100.097	116.127	93.961	86.9803	0.106332	0.750702	0.644371	PF00226,PF11926	PTHR24077:SF88,PTHR24077					AT3G04980.1		DNAJ heat shock N-terminal domain-containing protein
Glyma.12G032000.1	5.07214	0.957365	2.65718	2.30951	2.11541	2.12972	1.98507	2.79092	10.7604	-1.24507	-0.40629	0.838778	PF01490	PTHR22950	KOG1303				AT5G09220.1	AAP2	amino acid permease 2
Glyma.17G120900.1	73.0389	60.314	45.172	38.1069	71.924	59.6321	65.5074	68.8427	55.5956	-0.162915	-0.0734531	0.0894623	PF00850	PTHR10625,PTHR10625:SF22	KOG1342				AT3G18520.1	ATHDA15,HDA15	histone deacetylase 15
Glyma.03G263300.1	13.1876	10.531	19.486	11.5475	11.6348	22.362	27.791	36.282	40.3517	-1.19712	0.0760886	1.27321
Glyma.09G003700.1	25.3607	26.8062	21.2574	19.6308	28.5581	26.6215	26.7985	32.5608	27.7978	-0.220379	0.0269794	0.247359	PF00071	PTHR24073,PTHR24073:SF213	KOG0087			GO:0005525,GO:0007264,GO:0005622	AT3G12160.1	ATRABA4D,RABA4D	RAB GTPase homolog A4D
Glyma.14G170100.1	3.04329	0.957365	0.885726	2.30951	5.28853	3.19458	0.992536	4.65154	1.79341	0.537159	1.14321	0.606049	PF04570						AT1G78020.1		Protein of unknown function (DUF581)
Glyma.07G204000.1	22.3174	18.1899	7.97153	19.6308	13.7502	13.8432	23.8209	16.7455	20.6242	-0.373784	-0.0378313	0.335953	PF00612	PTHR10699:SF9,PTHR10699				GO:0005515	AT2G33990.1	iqd9	IQ-domain 9
Glyma.20G005400.1	187.669	282.423	263.061	239.034	239.041	240.658	132.007	156.292	208.932	0.531542	-0.0286557	-0.560198	PF00856,PF02182,PF05033	PTHR22884,PTHR22884:SF20	KOG1082			GO:0005515,GO:0042393,GO:0008270,GO:0018024,GO:0034968,GO:0005634	AT4G13460.1	SDG22,SET22,SUVH9	SU(VAR)3-9 homolog 9
Glyma.08G023300.1	457.507	612.713	579.265	479.223	470.679	507.938	585.596	603.769	603.482	-0.29842	-0.178184	0.120236	PF01031,PF00350,PF02212	PTHR11566:SF12,PTHR11566	KOG0446			GO:0003924,GO:0005525	AT5G42080.1	ADL1,ADL1A,AG68,DL1,DRP1A,RSW9	dynamin-like protein
Glyma.04G004000.1	456.493	845.353	744.896	533.497	600.777	611.229	612.395	585.163	682.392	-0.107051	-0.229686	-0.122635	PF00632	PTHR11254,PTHR11254:SF73	KOG0168	6.3.2.19	K10590	GO:0004842	AT4G38600.1	KAK,UPL3	HEAT repeat ;HECT-domain (ubiquitin-transferase)
Glyma.05G004300.1	14642.3	18057.8	16419.6	22267.1	24483.8	22471.7	14080.1	10756.2	13351	0.858149	0.494943	-0.363206	PF01277					GO:0012511,GO:0016021	AT3G01570.1		Oleosin family protein
Glyma.18G257400.1	9.12986	6.70155	1.77145	9.23804	17.981	6.38915	40.694	15.8152	8.07033	-0.942264	0.933003	1.87527	PF04774	PTHR12299,PTHR12299:SF4					AT4G16830.1		Hyaluronan / mRNA binding family
Glyma.06G117500.1	200.857	166.581	184.231	224.022	326.831	239.593	245.156	179.549	253.767	0.220377	0.518864	0.298487							AT1G21600.1	PTAC6	plastid transcriptionally active 6
Glyma.01G133500.1	5.07214	0.957365	4.42863	3.46426	4.23082	6.38915	3.97014	3.72123	1.79341	0.570396	0.429456	-0.14094	PF00010	PTHR10014:SF30,PTHR10014				GO:0046983	AT4G00050.1	UNE10	basic helix-loop-helix (bHLH) DNA-binding superfamily protein
Glyma.20G048300.1	118.688	117.756	112.487	264.439	228.464	193.804	126.052	93.961	88.7737	1.15309	0.976753	-0.176332	PF07714	PTHR24420:SF897,PTHR24420	KOG1187			GO:0004672,GO:0005524,GO:0006468	AT1G14370.1	APK2A,PBL2	protein kinase 2A
Glyma.18G018300.1	5.07214	0.957365	1.77145	1.15475	1.05771	1.06486	1.98507	0.930307	0.896704	-0.218063	-1.25114	-1.03307	PF04782,PF04783	PTHR21450					AT4G39790.1		Protein of unknown function (DUF630 and DUF632)
Glyma.01G188900.1	255.636	185.729	210.803	364.903	345.87	310.939	235.231	260.486	225.073	0.503337	0.647673	0.144336	PF00179	PTHR24067:SF32,PTHR24067	KOG0424	6.3.2.19	K10577	GO:0016881	AT3G57870.1	AHUS5,ATSCE1,EMB1637,SCE1,SCE1A	sumo conjugation enzyme 1
Glyma.19G037000.1	33.4761	26.8062	16.8288	35.7974	26.4426	21.2972	19.8507	30.7001	13.4506	0.384315	0.11548	-0.268836	PF10046	PTHR10668,PTHR10668:SF1	KOG4559				AT5G49550.1
Glyma.12G062400.1	297.228	328.376	321.519	240.189	250.676	240.658	356.32	324.677	286.048	-0.402681	-0.372647	0.030034	PF01237	PTHR10972,PTHR10972:SF8	KOG2209				AT5G59420.1	ORP3C	OSBP(oxysterol binding protein)-related protein 3C
Glyma.15G120200.1	4.05771	0.957365	2.65718	5.77377	7.40394	3.19458	0.992536	0.930307	1.79341	2.13934	1.09353	-1.0458							AT2G24960.2
Glyma.16G103800.1	52.7503	28.7209	38.9719	69.2853	38.0774	26.6215	45.6567	42.7941	36.7649	0.0976478	0.15371	0.0560621	PF07683	PTHR13748:SF11,PTHR13748					AT1G80480.1	PTAC17	plastid transcriptionally active 17
Glyma.05G045800.1	148.107	115.841	108.059	502.318	286.638	338.625	83.373	63.2609	101.328	2.18504	1.59983	-0.585211							AT5G63350.1
Glyma.01G231500.1	10.1443	23.9341	21.2574	1.15475	1.05771	2.12972	12.903	4.65154	9.86374	-2.65865	-3.67172	-1.01308	PF01535	PTHR24015:SF101,PTHR24015					AT1G71490.1		Tetratricopeptide repeat (TPR)-like superfamily protein
Glyma.17G208500.1	480.839	598.353	522.578	444.581	368.082	408.906	539.94	528.415	567.613	-0.42141	-0.390933	0.0304766	PF03638	PTHR12446:SF4,PTHR12446					AT3G22780.1	ATTSO1,TSO1	Tesmin/TSO1-like CXC domain-containing protein
Glyma.12G165700.1	166.366	242.213	170.945	116.63	168.175	138.432	293.791	275.371	266.321	-0.981144	-0.453404	0.52774		PTHR11208,PTHR11208:SF25	KOG1588				AT1G09660.1		RNA-binding KH domain-containing protein
Glyma.07G077700.1	3.04329	9.57365	7.97153	3.46426	2.11541	1.06486	0.992536	1.86061	5.38022	-0.309315	-1.6316	-1.32228	PF00931	PTHR23155,PTHR23155:SF121	KOG4658			GO:0043531	AT4G26090.1	RPS2	NB-ARC domain-containing disease resistance protein
Glyma.14G083900.1	448.378	374.33	403.005	702.091	679.047	667.667	386.096	393.52	411.587	0.782363	0.741162	-0.0412007		PTHR14493:SF21,PTHR14493	KOG1100				AT1G45976.1	SBP1	S-ribonuclease binding protein 1
Glyma.18G290800.1	879.51	953.535	961.013	653.591	673.758	717.715	1366.72	1298.71	1205.17	-0.920411	-0.450215	0.470196	PF00022	PTHR11937,PTHR11937:SF77	KOG0676		K10355		AT3G12110.1	ACT11	actin-11
Glyma.04G224900.1	1336	877.903	953.927	473.449	444.236	608.035	612.395	750.758	696.739	-0.433078	-1.05401	-0.620928							AT3G54190.1		Transducin/WD40 repeat-like superfamily protein
Glyma.20G241700.1	196.799	201.047	213.46	15.0118	37.0197	44.7241	34.7388	47.4457	49.3187	-0.44268	-2.65948	-2.2168	PF02431			5.5.1.6	K01859	GO:0016872	AT3G55120.1	A11,CFI,TT5	Chalcone-flavanone isomerase family protein
Glyma.06G156600.1	16.2309	33.5078	23.0289	45.0354	92.0204	28.7512	15.8806	27.9092	34.0747	1.09047	1.18814	0.0976721	PF01490	PTHR22950	KOG1303				AT5G09220.1	AAP2	amino acid permease 2
Glyma.18G167600.1	28.404	22.0194	21.2574	25.4046	35.962	22.362	0.992536	1.86061	3.58681	3.7006	0.224134	-3.47646							AT3G06240.1		F-box family protein
Glyma.02G251800.1	1.01443	6.70155	0.885726	2.30951	1.05771	5.3243	0.992536	0.930307	0.896704	1.62414	0.0149838	-1.60916	PF12315,PF00412	PTHR24209:SF106,PTHR24209	KOG1703			GO:0008270	AT2G39830.1	DAR2	DA1-related protein 2
Glyma.04G222300.1	53.7647	51.6977	52.2578	32.3331	30.6735	50.0484	76.4253	131.173	89.6704	-1.39474	-0.480343	0.914401		PTHR22765,PTHR22765:SF22				GO:0005515,GO:0008270	AT3G10910.1		RING/U-box superfamily protein
Glyma.19G193700.1	6.08657	9.57365	6.20008	5.77377	9.51935	5.3243	4.96268	10.2334	3.58681	0.134446	-0.0844495	-0.218895	PF01156	PTHR12304	KOG2938				AT2G36310.1	URH1	uridine-ribohydrolase 1
Glyma.06G170200.1	17.2453	32.5504	34.5433	12.7023	6.34623	22.362	16.8731	20.4668	6.27693	-0.0748845	-1.0262	-0.951316							AT5G50410.1
Glyma.02G025600.1	99.414	61.2713	75.2867	62.3568	59.2315	55.3727	69.4775	93.961	98.6374	-0.566554	-0.415185	0.151369							AT1G69935.1	SHW1	short hypocotyl in white light1
Glyma.12G189700.1	39.5627	22.0194	25.6861	45.0354	41.2505	19.1675	55.582	36.282	29.5912	-0.203819	0.273079	0.476897	PF01103	PTHR12815				GO:0019867	AT3G44160.1		Outer membrane OMP85 family protein
Glyma.03G016700.1	143.034	167.539	158.545	133.952	180.868	160.794	134.985	152.57	147.059	0.130051	0.0198364	-0.110215	PF03141	PTHR10108:SF58,PTHR10108				GO:0008168,GO:0008152	AT4G00740.1		S-adenosyl-L-methionine-dependent methyltransferases superfamily protein
Glyma.09G283000.1	47.6782	50.7403	67.3152	66.9758	65.5777	104.356	30.7686	22.3274	38.5583	1.37006	0.515471	-0.854593	PF01535	PTHR24015:SF77,PTHR24015					AT2G35030.1		Pentatricopeptide repeat (PPR) superfamily protein
Glyma.03G167300.1	155.208	104.353	135.516	160.511	123.752	142.691	107.194	94.8913	141.679	0.312659	0.111947	-0.200712							AT2G20390.1
Glyma.19G248600.1	527.503	543.783	471.206	814.102	600.777	741.142	380.141	377.705	400.827	0.895898	0.483108	-0.41279		PTHR14095	KOG2562		K11583	GO:0005509	AT5G28850.2		Calcium-binding EF-hand family protein
Glyma.09G130100.1	4.05771	3.82946	2.65718	2.30951	4.23082	1.06486	0.992536	0.930307	0.896704	1.43152	-0.471414	-1.90294	PF00646					GO:0005515	AT3G29830.1		F-box/RNI-like superfamily protein
Glyma.02G079900.1	78.111	95.7365	124.002	87.7614	94.1358	76.6699	70.4701	102.334	74.4264	0.0646829	-0.204043	-0.268726	PF01529	PTHR22883	KOG1311			GO:0008270	AT4G24630.1		DHHC-type zinc finger family protein
Glyma.19G210100.1	11.1587	19.1473	7.97153	18.4761	17.981	12.7783	26.7985	6.51215	16.1407	-0.00631265	0.363197	0.36951	PF03073					GO:0016021	AT2G47770.1	ATTSPO,TSPO	TSPO(outer membrane tryptophan-rich sensory protein)-related
Glyma.01G222600.1	168.395	205.833	217.889	273.677	278.177	280.058	320.589	425.15	421.451	-0.488538	0.490547	0.979085	PF04525	PTHR10233,PTHR10233:SF7					AT5G41590.1		Protein of unknown function (DUF567)
Glyma.07G208600.1	171.438	191.473	168.288	103.928	134.329	152.275	130.022	147.919	147.956	-0.125067	-0.443815	-0.318748	PF00787,PF08628,PF02194	PTHR22999,PTHR22999:SF2				GO:0005515,GO:0035091,GO:0007154	AT2G15900.1		Phox-associated domain;Phox-like;Sorting nexin, C-terminal
Glyma.02G035600.1	878.495	799.4	743.124	364.903	415.678	389.738	776.163	1080.09	863.526	-1.21659	-1.04871	0.167873	PF00025	PTHR11711	KOG0070		K07977	GO:0005525,GO:0007264,GO:0005634,GO:0005737,GO:0005622	AT1G10630.1	ARFA1F,ATARFA1F	ADP-ribosylation factor A1F
Glyma.09G247700.1	2.02886	1.91473	1.77145	1.15475	1.05771	1.06486	0.992536	1.86061	0.896704	-0.194318	-0.802247	-0.607929							AT5G16250.1
Glyma.18G030300.1	1.01443	1.91473	2.65718	1.15475	2.11541	1.06486	6.94775	2.79092	0.896704	-1.29476	-0.365862	0.928897	PF00249	PTHR25040:SF29,PTHR25040	KOG0724			GO:0003682	AT3G11280.1		Duplicated homeodomain-like superfamily protein
Glyma.18G050600.1	7.101	17.2326	10.6287	121.249	39.1351	39.3998	11.9104	6.51215	23.3143	2.25905	2.51457	0.255523	PF00252	PTHR11726,PTHR11726:SF9	KOG0857		K02866	GO:0003735,GO:0006412,GO:0005840	AT1G26910.1	RPL10B	Ribosomal protein L16p/L10e family protein
Glyma.04G008100.1	266.795	192.43	197.517	191.689	179.81	189.545	270.962	281.883	251.974	-0.52055	-0.227212	0.293338		PTHR12868	KOG3466	1.6.5.3,1.6.99.3	K03965		AT4G34700.1		LYR family of Fe/S cluster biogenesis protein
Glyma.10G161800.1	1.01443	0.957365	3.5429	1.15475	1.05771	1.06486	0.992536	3.72123	0.896704	-0.775605	-0.750765	0.0248396
Glyma.05G178500.1	1.01443	0.957365	0.885726	1.15475	1.05771	2.12972	2.97761	1.86061	0.896704	-0.401356	0.603656	1.00501	PF03000	PTHR13690:SF174,PTHR13690					AT5G10250.1	DOT3	Phototropic-responsive NPH3 family protein
Glyma.02G308700.1	27.3896	22.9768	15.9431	46.1902	30.6735	64.9564	15.8806	28.8395	10.7604	1.35401	1.09678	-0.257231	PF02469	PTHR10900:SF23,PTHR10900					AT4G12730.1	FLA2	FASCICLIN-like arabinogalactan 2
Glyma.20G186700.1	68.9812	60.314	69.0866	61.202	61.3469	58.5673	86.3506	126.522	96.844	-0.774032	-0.131364	0.642668	PF02127	PTHR10761	KOG2596	3.4.11.21	K01267	GO:0004177,GO:0008270,GO:0006508	AT5G04710.1		Zn-dependent exopeptidases superfamily protein
Glyma.06G097000.1	92.313	87.1202	92.1155	130.487	162.887	116.07	129.03	99.5429	118.365	0.238989	0.592454	0.353465							AT3G12345.1
Glyma.19G250900.1	24.3463	33.5078	22.1432	6.92853	19.0387	9.58373	40.694	38.1426	35.8681	-1.68996	-1.17006	0.519903							AT5G18310.1
Glyma.07G177700.1	1.01443	1.91473	1.77145	1.15475	4.23082	2.12972	1.98507	2.79092	0.896704	0.405795	0.676982	0.271187	PF01781	PTHR10965	KOG3499			GO:0003735,GO:0006412,GO:0005622,GO:0005840	AT3G59540.1		Ribosomal L38e protein family
Glyma.02G140100.1	319.545	286.252	252.432	429.569	347.985	341.82	219.35	196.295	203.552	0.854221	0.383257	-0.470964	PF03005	PTHR13533,PTHR13533:SF3					AT1G29050.1	TBL38	TRICHOME BIREFRINGENCE-LIKE 38
Glyma.02G087600.1	6.08657	1.91473	5.31436	1.15475	2.11541	1.06486	3.97014	0.930307	2.69011	-0.808166	-1.61901	-0.810845	PF00400	PTHR19918				GO:0005515	AT4G33270.1	CDC20.1	Transducin family protein / WD-40 repeat family protein
Glyma.12G211800.1	13.1876	15.3178	13.2859	3.46426	7.40394	4.25944	9.92536	25.1183	10.7604	-1.59829	-1.46602	0.132274	PF00069	PTHR24420:SF882,PTHR24420	KOG1187			GO:0004672,GO:0005524,GO:0006468	AT3G58690.1		Protein kinase superfamily protein
Glyma.14G040700.1	731.403	706.535	666.952	532.342	364.908	379.09	367.238	337.702	314.743	0.323892	-0.721732	-1.04562	PF04739	PTHR10343	KOG1616			GO:0005515	AT5G21170.1	AKINBETA1	5\'-AMP-activated protein kinase beta-2 subunit protein
Glyma.20G074100.1	3.04329	4.78682	2.65718	1.15475	1.05771	2.12972	0.992536	0.930307	0.896704	0.622956	-1.27215	-1.89511
Glyma.02G086300.1	34.4906	113.926	101.858	69.2853	74.0394	133.107	22.8283	26.9789	43.9385	1.5601	0.143408	-1.41669
Glyma.07G117400.1	32.4617	24.8915	31.0004	57.7377	38.0774	45.7889	59.5522	36.282	51.1121	-0.0534257	0.680502	0.733928	PF07714	PTHR24420:SF793,PTHR24420	KOG1187	2.7.1.-	K00924	GO:0004672,GO:0005524,GO:0006468	AT5G47070.1		Protein kinase superfamily protein
Glyma.09G012200.1	42.606	38.2946	38.9719	48.4997	39.1351	56.4375	68.485	60.47	56.4923	-0.364216	0.265292	0.629508	PF04535	PTHR11615,PTHR11615:SF57					AT2G35760.1		Uncharacterised protein family (UPF0497)
Glyma.20G224600.1	21.303	10.531	14.1716	10.3928	11.6348	10.6486	15.8806	15.8152	17.0374	-0.576666	-0.493573	0.0830936	PF02416					GO:0008565,GO:0015031	AT5G28750.1		Bacterial sec-independent translocation protein mttA/Hcf106
Glyma.07G004400.1	16.2309	22.0194	11.5144	24.2499	21.1541	35.1404	20.8433	25.1183	36.7649	-0.0385651	0.69466	0.733225	PF00646	PTHR10706				GO:0005515	AT5G56420.1		F-box/RNI-like/FBD-like domains-containing protein
Glyma.10G096300.1	26.3751	14.3605	28.3432	78.5233	34.9043	40.4646	25.8059	38.1426	29.5912	0.718269	1.1556	0.437336	PF10167	PTHR21146	KOG4523				AT2G39170.1
Glyma.12G010700.1	20.2886	4.78682	7.97153	11.5475	24.3272	8.51887	14.888	19.5365	19.7275	-0.286661	0.425837	0.712498	PF01733	PTHR10332,PTHR10332:SF3	KOG1479			GO:0005337,GO:0006810,GO:0016021	AT1G70330.1	ENT1,ENT1AT	equilibrative nucleotide transporter 1
Glyma.06G265100.1	11.1587	4.78682	2.65718	4.61902	3.17312	5.3243	2.97761	6.51215	7.17363	-0.345307	-0.504138	-0.158832
Glyma.19G173100.1	262.737	273.806	155.002	900.709	909.627	1082.96	496.268	356.308	403.517	1.20377	2.06482	0.861047	PF01399	PTHR14005	KOG2072		K03254	GO:0005515	AT4G11420.1	ATEIF3A-1,ATTIF3A1,EIF3A,EIF3A-1,TIF3A1	eukaryotic translation initiation factor 3A
Glyma.09G274800.1	3.04329	14.3605	16.8288	4.61902	17.981	1.06486	11.9104	8.37277	13.4506	-0.511446	-0.532622	-0.021176	PF01535	PTHR24015					AT5G16640.1		Pentatricopeptide repeat (PPR) superfamily protein
Glyma.04G238000.1	1681.92	1556.68	1604.05	1998.88	1823.48	1842.21	1521.56	1497.79	1585.37	0.298852	0.226171	-0.0726812	PF00076	PTHR11546:SF16,PTHR11546	KOG1190			GO:0003676	AT5G53180.1	ATPTB2,PTB2	polypyrimidine tract-binding protein 2
Glyma.08G150200.1	372.295	359.969	408.32	497.699	499.237	413.165	461.529	523.763	488.704	-0.0639331	0.306026	0.369959	PF00023	PTHR24193	KOG4214			GO:0005515	AT5G12320.1		ankyrin repeat family protein
Glyma.01G097900.1	21.303	26.8062	22.1432	16.1666	9.51935	9.58373	9.92536	23.2577	11.6571	-0.346365	-0.99412	-0.647754	PF00097,PF00092	PTHR11210:SF4,PTHR11210	KOG0320			GO:0046872,GO:0005515,GO:0008270	AT2G22680.1		Zinc finger (C3HC4-type RING finger) family protein
Glyma.06G242700.1	5.07214	2.87209	0.885726	1.15475	1.05771	1.06486	7.94029	3.72123	6.27693	-2.45247	-1.42989	1.02258							AT1G53035.1
Glyma.19G105900.1	81.1543	122.543	113.373	65.821	66.6355	74.5401	57.5671	77.2155	79.8066	-0.0519704	-0.615194	-0.563223	PF02705					GO:0015079,GO:0071805,GO:0016020	AT3G02050.1	ATKT4,ATKUP3,KUP3	K+ uptake transporter 3
Glyma.13G224900.1	8.11543	19.1473	8.85726	4.61902	2.11541	6.38915	6.94775	12.094	10.7604	-1.18326	-1.46064	-0.277379	PF00230	PTHR19139,PTHR19139:SF22	KOG0223		K09874	GO:0005215,GO:0006810,GO:0016020	AT4G18910.1	ATNLM2,NIP1;2,NLM2	NOD26-like intrinsic protein 1;2
Glyma.10G291900.1	407.8	369.543	386.177	312.939	344.812	371.636	583.611	504.227	656.387	-0.760801	-0.176711	0.58409	PF00023	PTHR24177,PTHR24177:SF119	KOG4412			GO:0005515	AT3G12360.1	ITN1	Ankyrin repeat family protein
Glyma.11G075800.1	8.11543	20.1047	19.486	12.7023	8.46164	12.7783	7.94029	28.8395	21.5209	-0.780431	-0.49109	0.289341		PTHR23102,PTHR23102:SF17					AT1G19860.1		Zinc finger C-x8-C-x5-C-x3-H type family protein
Glyma.18G278000.1	89.2697	96.6938	112.487	73.9043	93.0781	64.9564	135.977	123.731	148.853	-0.816808	-0.363749	0.453059	PF04427	PTHR13634	KOG2971				AT3G15460.1		Ribosomal RNA processing Brix domain protein
Glyma.11G193200.1	1.01443	1.91473	0.885726	1.15475	5.28853	1.06486	0.992536	7.44246	1.79341	-0.446053	0.976817	1.42287	PF07795						AT5G22930.1		Protein of unknown function (DUF1635)
Glyma.08G002800.1	382.44	336.035	295.833	285.224	318.369	325.847	370.216	266.998	343.438	-0.0773779	-0.12606	-0.048682			KOG1609			GO:0008270	AT5G08750.3		RING/FYVE/PHD zinc finger superfamily protein
Glyma.13G334400.1	47.6782	27.7636	40.7434	51.964	27.5003	48.9835	11.9104	21.3971	26.0044	1.11479	0.144757	-0.970032							AT2G39570.1		ACT domain-containing protein
Glyma.05G042000.1	2.02886	3.82946	3.5429	1.15475	1.05771	1.06486	0.992536	0.930307	0.896704	0.217053	-1.52033	-1.73738	PF05910						AT4G12690.1		Plant protein of unknown function (DUF868)
Glyma.07G246800.1	314.473	278.593	292.29	340.653	292.984	316.263	405.947	357.238	383.789	-0.271985	0.101519	0.373504	PF00225	PTHR24115,PTHR24115:SF79	KOG0246		K10393	GO:0003777,GO:0005524,GO:0008017,GO:0007018	AT3G16630.1	ATKINESIN-13A,KINESIN-13A	P-loop containing nucleoside triphosphate hydrolases superfamily protein
Glyma.13G275200.1	1.01443	2.87209	2.65718	1.15475	1.05771	4.25944	3.97014	0.930307	1.79341	-0.0486494	-0.0159182	0.0327312
Glyma.04G002400.1	56.808	67.0155	92.1155	85.4519	105.771	112.875	146.895	118.149	133.609	-0.3906	0.49391	0.88451	PF03094				K08472	GO:0006952,GO:0016021	AT4G02600.1	ATMLO1,MLO1	Seven transmembrane MLO family protein
Glyma.06G235500.1	348.963	322.632	461.463	534.651	442.121	392.933	285.85	281.883	333.574	0.603775	0.273643	-0.330132	PF00155	PTHR11751,PTHR11751:SF28	KOG0259	2.6.1.5	K00815	GO:0030170,GO:0009058,GO:0016829,GO:0006520	AT5G53970.1		Tyrosine transaminase family protein
Glyma.05G248700.1	77.0966	33.5078	54.915	17.3213	30.6735	20.2323	17.8656	24.188	21.5209	0.101896	-1.27858	-1.38048							AT5G42710.1
Glyma.06G186800.1	174.482	140.733	139.059	228.641	196.733	219.361	181.634	182.34	167.684	0.27821	0.505147	0.226938	PF02319	PTHR12081:SF8,PTHR12081	KOG2578			GO:0003700,GO:0006355,GO:0005667	AT3G48160.1	DEL1,E2FE,E2L3	DP-E2F-like 1
Glyma.15G017600.1	72.0244	90.9497	77.0582	71.5948	106.828	99.0319	80.3954	71.6337	47.5253	0.475472	0.209025	-0.266446							AT3G16200.1
Glyma.08G197900.1	5.07214	7.65892	6.20008	6.92853	4.23082	18.1026	5.95522	0.930307	5.38022	1.25439	0.628265	-0.626127	PF00271	PTHR24031,PTHR24031:SF23				GO:0003676,GO:0004386,GO:0005524	AT3G18600.1		P-loop containing nucleoside triphosphate hydrolases superfamily protein
Glyma.15G080000.1	13.1876	9.57365	8.85726	6.92853	10.5771	10.6486	13.8955	13.0243	17.0374	-0.64275	-0.167419	0.475331		PTHR10699:SF9,PTHR10699					AT2G33990.1	iqd9	IQ-domain 9
Glyma.10G097100.1	6.08657	4.78682	7.97153	21.9403	24.3272	21.2972	1.98507	10.2334	4.48352	2.01625	1.84209	-0.174158
Glyma.04G112500.1	98.3996	61.2713	68.2009	42.7259	32.7889	31.9458	80.3954	79.0761	36.7649	-0.868785	-1.08442	-0.21563							AT5G56170.1	LLG1	LORELEI-LIKE-GPI-ANCHORED PROTEIN 1
Glyma.15G140200.1	5.07214	2.87209	1.77145	2.30951	1.05771	3.19458	1.98507	9.30307	7.17363	-1.49238	-0.566226	0.926153	PF00549,PF00285	PTHR26330	KOG1254			GO:0046912,GO:0044262,GO:0003824,GO:0008152	AT3G06650.1	ACLB-1	ATP-citrate lyase B-1
Glyma.06G050500.1	82.1687	70.845	66.4295	21.9403	35.962	50.0484	57.5671	95.8217	61.8726	-0.995716	-1.02347	-0.0277584							AT5G11740.1	AGP15,ATAGP15	arabinogalactan protein 15
Glyma.05G242800.1	304.329	342.737	334.804	326.796	325.773	383.349	297.761	321.886	365.855	0.0719791	0.0773067	0.00532763	PF00035,PF07717,PF00270,PF04408,PF00271	PTHR18934,PTHR18934:SF68	KOG0920			GO:0003676,GO:0005524,GO:0008026,GO:0004386	AT1G48650.1		DEA(D/H)-box RNA helicase family protein
Glyma.04G190100.1	825.745	1028.21	869.783	725.186	726.644	511.132	1627.76	1051.25	1519.91	-1.09699	-0.472555	0.62443	PF00076	PTHR24012,PTHR24012:SF56	KOG0131			GO:0003676	AT4G24770.1	ATRBP31,ATRBP33,CP31,RBP31	31-kDa RNA binding protein
Glyma.04G114700.1	1.01443	0.957365	0.885726	28.8689	28.5581	23.4269	0.992536	0.930307	0.896704	4.84178	4.82248	-0.0193
Glyma.02G298900.1	15.2164	13.4031	15.0573	15.0118	10.5771	15.9729	25.8059	19.5365	25.1077	-0.761345	-0.0716132	0.689732	PF01535	PTHR24015,PTHR24015:SF137					AT3G06920.1		Tetratricopeptide repeat (TPR)-like superfamily protein
Glyma.18G200000.1	69.9956	54.5698	77.0582	45.0354	37.0197	64.9564	80.3954	71.6337	60.9759	-0.534957	-0.455735	0.0792227	PF00717	PTHR12383:SF8,PTHR12383	KOG1568	3.4.99.-	K09648		AT3G08980.1		Peptidase S24/S26A/S26B/S26C family protein
Glyma.18G206600.1	133.905	115.841	138.173	546.199	400.87	342.885	213.395	148.849	196.378	1.20737	1.73349	0.526118	PF00847					GO:0003700,GO:0006355	AT2G40340.1	AtERF48,DREB2C	Integrase-type DNA-binding superfamily protein
Glyma.12G160600.1	12.1731	18.1899	10.6287	3.46426	8.46164	7.45401	11.9104	10.2334	17.0374	-1.0156	-1.08077	-0.065174
Glyma.14G209900.1	2.02886	3.82946	4.42863	1.15475	1.05771	1.06486	2.97761	7.44246	0.896704	-1.78787	-1.65023	0.137647	PF00862,PF00534	PTHR12526,PTHR12526:SF27	KOG0853	2.4.1.13	K00695	GO:0009058,GO:0005985	AT1G73370.1	ATSUS6,SUS6	sucrose synthase 6
Glyma.17G232600.1	147.092	163.709	155.888	392.617	227.407	250.242	102.231	144.198	142.576	1.16167	0.898993	-0.262675	PF08879,PF08880					GO:0005515,GO:0005524,GO:0016818,GO:0006355,GO:0005634	AT2G22840.1	AtGRF1,GRF1	growth-regulating factor 1
Glyma.06G034900.1	33.4761	40.2093	28.3432	26.5594	19.0387	23.4269	87.3432	65.1215	85.1869	-1.78366	-0.563785	1.21987							AT1G48460.1
Glyma.03G134600.1	5.07214	5.74419	6.20008	4.61902	3.17312	4.25944	15.8806	8.37277	13.4506	-1.64549	-0.497706	1.14779	PF00382,PF08271	PTHR11618:SF13,PTHR11618	KOG1597		K03124	GO:0017025	AT3G10330.1		Cyclin-like family protein
Glyma.08G189600.1	6.08657	31.593	18.6002	15.0118	10.5771	14.908	22.8283	21.3971	23.3143	-0.737924	-0.474807	0.263117	PF00305,PF01477	PTHR11771:SF2,PTHR11771				GO:0016702,GO:0046872,GO:0055114,GO:0005515	AT1G55020.1	ATLOX1,LOX1	lipoxygenase 1
Glyma.20G060000.1	294.184	272.849	288.747	229.796	204.137	186.35	222.328	199.086	209.829	-0.025266	-0.464312	-0.439046							AT2G04360.1
Glyma.17G208900.1	12.1731	4.78682	4.42863	4.61902	10.5771	7.45401	31.7611	13.0243	8.96704	-1.24681	0.0826748	1.32949		PTHR22996					AT3G09770.2		RING/U-box superfamily protein
Glyma.04G087800.1	27.3896	28.7209	24.8003	8.08328	16.9233	15.9729	25.8059	14.8849	16.1407	-0.47179	-0.981432	-0.509642	PF06219						AT1G10020.1		Protein of unknown function (DUF1005)
Glyma.08G051800.1	75.0677	69.8876	84.144	116.63	117.405	106.486	122.082	102.334	122.848	-0.0282876	0.571773	0.60006	PF10545		KOG4282				AT2G44730.1		Alcohol dehydrogenase transcription factor Myb/SANT-like family protein
Glyma.08G238400.1	327.66	359.969	387.062	372.986	466.448	436.592	349.373	230.716	302.189	0.532353	0.247735	-0.284618	PF09335	PTHR12677	KOG3140				AT1G22850.1		SNARE associated Golgi protein family
Glyma.14G041200.1	622.859	536.124	511.95	376.45	388.178	441.917	499.246	599.118	491.394	-0.397925	-0.469773	-0.0718476	PF00560,PF08263	PTHR24420,PTHR24420:SF836				GO:0005515	AT5G21090.1		Leucine-rich repeat (LRR) family protein
Glyma.01G036000.1	1.01443	5.74419	5.31436	11.5475	1.05771	9.58373	4.96268	0.930307	0.896704	1.70843	0.878063	-0.830363	PF00201	PTHR11926,PTHR11926:SF15	KOG1192	2.4.1.195	K11820	GO:0016758,GO:0008152	AT1G24100.1	UGT74B1	UDP-glucosyl transferase 74B1
Glyma.17G244600.1	256.65	331.248	325.947	217.094	182.983	270.474	135.977	143.267	159.613	0.611593	-0.446603	-1.0582	PF00149					GO:0016787	AT4G11800.1		Calcineurin-like metallo-phosphoesterase superfamily protein
Glyma.13G293200.1	1.01443	4.78682	0.885726	2.30951	5.28853	1.06486	0.992536	1.86061	0.896704	1.20801	0.373495	-0.83452	PF00071	PTHR24073,PTHR24073:SF213	KOG0087			GO:0003924,GO:0005525,GO:0007264,GO:0005634,GO:0005737,GO:0005622	AT5G60860.1	AtRABA1f,RABA1f	RAB GTPase homolog A1F
Glyma.19G168000.1	11.1587	13.4031	33.6576	96.9994	111.059	92.6427	20.8433	13.9546	26.9011	2.28501	2.36876	0.0837463	PF01657	PTHR11795,PTHR11795:SF83					AT5G43980.1	PDLP1,PDLP1A	plasmodesmata-located protein 1
Glyma.04G086900.1	587.354	538.996	588.122	782.924	635.681	719.845	407.932	479.108	480.633	0.644841	0.3188	-0.326041	PF00365	PTHR13697	KOG2440	2.7.1.11	K00850	GO:0003872,GO:0006096,GO:0005945	AT4G26270.1	PFK3	phosphofructokinase 3
Glyma.07G031500.1	68.9812	45.9535	38.9719	27.7141	31.7312	50.0484	43.6716	37.2123	36.7649	-0.103638	-0.491208	-0.387569	PF10250						AT1G52630.1		O-fucosyltransferase family protein
Glyma.19G198000.1	26.3751	12.4457	12.4002	23.0951	23.2695	21.2972	12.903	18.6061	8.07033	0.77359	0.401605	-0.371985	PF03134	PTHR12300,PTHR12300:SF20	KOG1726				AT2G36020.1	HVA22J	HVA22-like protein J
Glyma.05G170200.1	21.303	6.70155	6.20008	20.7856	21.1541	20.2323	10.9179	18.6061	8.96704	0.691741	0.862073	0.170332	PF09282	PTHR22959	KOG4325			GO:0005515	AT1G11400.1	PYM	partner of Y14-MAGO
Glyma.11G231100.1	471.709	759.19	652.78	414.557	441.063	467.473	845.641	736.803	817.794	-0.859262	-0.509639	0.349624	PF00637,PF01394,PF09268	PTHR10292	KOG0985		K04646	GO:0006886,GO:0016192,GO:0005198,GO:0030130,GO:0030132	AT3G11130.1		Clathrin, heavy chain
Glyma.18G236200.1	63.909	31.593	34.5433	39.2617	58.1738	48.9835	85.3581	76.2852	67.2528	-0.64459	0.171088	0.815678	PF04147	PTHR23183	KOG2147			GO:0032040	AT1G69070.1
Glyma.14G061500.1	12302	15482.5	13675.6	17524.6	14979.2	15045.4	17834.9	14596.5	16233	-0.0334471	0.197697	0.231144	PF00230	PTHR19139,PTHR19139:SF55	KOG0223		K09872	GO:0005215,GO:0006810,GO:0016020	AT4G00430.1	PIP1;4,PIP1E,TMP-C	plasma membrane intrinsic protein 1;4
Glyma.08G317200.1	84.1976	111.054	124.002	118.94	81.4433	86.2536	133.992	173.037	133.609	-0.620372	-0.155479	0.464892	PF04520						AT4G26950.1		Protein of unknown function, DUF584
Glyma.16G014200.1	391.569	492.085	412.748	516.175	436.832	519.651	363.268	306.071	406.207	0.453354	0.183909	-0.269445	PF07393	PTHR12100	KOG3745			GO:0006887,GO:0048278,GO:0005737	AT5G12370.3	SEC10	exocyst complex component sec10
Glyma.03G153500.1	2.02886	1.91473	0.885726	2.30951	1.05771	2.12972	1.98507	1.86061	1.79341	-0.0368364	0.186809	0.223645
Glyma.15G252700.1	13.1876	20.1047	19.486	99.3089	112.117	90.513	13.8955	12.094	26.0044	2.53784	2.51624	-0.0215998	PF00069	PTHR24351,PTHR24351:SF88	KOG0610			GO:0004672,GO:0005524,GO:0006468	AT1G53700.1	PK3AT,WAG1	WAG 1
Glyma.04G036300.1	54.7792	71.8024	54.0293	56.583	72.9817	73.4753	66.4999	83.7277	58.2857	-0.0383758	0.168879	0.207255	PF00069	PTHR24361:SF62,PTHR24361	KOG0198			GO:0004672,GO:0005524,GO:0006468	AT5G66850.1	MAPKKK5	mitogen-activated protein kinase kinase kinase 5
Glyma.02G004500.1	1.01443	0.957365	1.77145	1.15475	1.05771	1.06486	0.992536	0.930307	0.896704	0.217053	-0.191773	-0.408826
Glyma.02G229800.1	1081.38	848.225	1011.5	1429.59	1357.04	1054.21	1425.28	1189.86	1267.94	-0.0157835	0.385061	0.400844	PF01248	PTHR23105:SF11,PTHR23105	KOG3387		K12845		AT4G22380.1		Ribosomal protein L7Ae/L30e/S12e/Gadd45 family protein
Glyma.11G157900.1	66.9523	42.124	37.2005	21.9403	44.4236	18.1026	22.8283	21.3971	18.8308	0.421743	-0.792249	-1.21399		PTHR12277:SF12,PTHR12277					AT4G17150.1		alpha/beta-Hydrolases superfamily protein
Glyma.07G185600.1	154.193	183.814	186.002	129.333	117.405	128.848	162.776	155.361	140.782	-0.289099	-0.480451	-0.191352	PF04434,PF10551,PF03108					GO:0008270	AT1G64260.1		MuDR family transposase
Glyma.17G166400.1	123.76	89.9923	86.8012	68.1305	100.482	93.7076	86.3506	94.8913	98.6374	-0.0934765	-0.196294	-0.102818	PF01283	PTHR12538	KOG1768		K02976	GO:0003735,GO:0006412,GO:0005622,GO:0005840	AT2G40590.1		Ribosomal protein S26e family protein
Glyma.07G003500.1	237.376	322.632	336.576	448.045	514.045	496.224	273.94	204.668	274.391	0.953582	0.701791	-0.251791	PF00076	PTHR12742	KOG1457			GO:0003676	AT3G21215.1		RNA-binding (RRM/RBD/RNP motifs) family protein
Glyma.01G175800.1	5.07214	5.74419	0.885726	2.30951	1.05771	6.38915	2.97761	3.72123	0.896704	0.361192	-0.262346	-0.623538
Glyma.04G037600.1	61.8802	58.3992	60.2294	55.4282	33.8466	31.9458	69.4775	77.2155	79.8066	-0.901874	-0.574434	0.32744							AT4G33380.1
Glyma.10G243800.1	81.1543	66.0582	36.3148	31.1784	33.8466	72.4104	14.888	24.188	16.1407	1.31558	-0.417241	-1.73282	PF00504	PTHR14154:SF1,PTHR14154					AT3G22840.1	ELIP,ELIP1	Chlorophyll A-B binding family protein
Glyma.20G104300.1	764.879	781.21	767.039	1833.75	1954.64	1689.93	611.402	569.348	601.688	1.61988	1.24389	-0.375993	PF00097	PTHR14155	KOG1493			GO:0046872,GO:0008270,GO:0005515	AT3G19910.1		RING/U-box superfamily protein
Glyma.15G272000.1	499.099	396.349	434.891	502.318	599.719	466.408	546.887	494.924	540.712	-0.012891	0.237541	0.250432	PF01585,PF01805	PTHR23340				GO:0003676,GO:0003723,GO:0006396	AT3G52120.1		SWAP (Suppressor-of-White-APricot)/surp domain-containing protein / D111/G-patch domain-containing protein
Glyma.09G175400.1	26.3751	12.4457	12.4002	19.6308	7.40394	12.7783	6.94775	4.65154	6.27693	1.1552	-0.363494	-1.5187	PF01535	PTHR24015					AT1G09900.1		Pentatricopeptide repeat (PPR-like) superfamily protein
Glyma.04G218400.1	7.101	1.91473	1.77145	9.23804	2.11541	4.25944	5.95522	2.79092	1.79341	0.566925	0.533419	-0.0335056	PF03106					GO:0003700,GO:0043565,GO:0006355	AT4G39410.1	ATWRKY13,WRKY13	WRKY DNA-binding protein 13
Glyma.16G177100.1	136.948	158.923	124.887	349.891	375.485	318.393	158.806	122.801	156.026	1.25401	1.31074	0.0567307	PF04278						AT5G62650.1		Tic22-like family protein
Glyma.19G096200.1	2.02886	3.82946	5.31436	1.15475	1.05771	1.06486	5.95522	0.930307	0.896704	-1.24767	-1.76939	-0.521719	PF01190						AT3G26960.1		Pollen Ole e 1 allergen and extensin family protein
Glyma.06G217000.1	594.455	905.667	809.554	943.435	917.031	758.18	654.081	423.29	509.328	0.722792	0.18113	-0.541662	PF00226,PF09320	PTHR24077:SF92,PTHR24077	KOG0714				AT3G57340.1		Heat shock protein DnaJ, N-terminal with domain of unknown function (DUF1977)
Glyma.01G158200.1	67.9667	26.8062	51.3721	50.8092	45.4813	41.5295	59.5522	52.0972	60.9759	-0.324857	-0.0846151	0.240242	PF00069	PTHR24055:SF118,PTHR24055	KOG0671			GO:0004672,GO:0005524,GO:0006468	AT4G35500.1		Protein kinase superfamily protein
Glyma.08G301000.1	1.01443	0.957365	2.65718	10.3928	5.28853	4.25944	3.97014	0.930307	0.896704	1.7823	2.10696	0.324653	PF00499			1.6.5.3	K03884	GO:0008137,GO:0055114	ATMG00270.1		NADH dehydrogenase 6
Glyma.14G133100.1	7.101	0.957365	2.65718	2.30951	2.11541	4.25944	0.992536	0.930307	1.79341	1.22457	-0.303214	-1.52779							AT4G31360.1		selenium binding
Glyma.20G208100.1	165.352	219.237	193.088	219.403	215.772	230.01	177.664	181.41	186.514	0.285943	0.203493	-0.0824498	PF02405						AT1G19800.1	TGD1	trigalactosyldiacylglycerol 1
Glyma.16G034800.1	12.1731	5.74419	3.5429	3.46426	5.28853	5.3243	0.992536	5.58184	4.48352	0.348272	-0.608317	-0.956589
Glyma.11G142200.1	14.202	4.78682	3.5429	16.1666	11.6348	17.0377	2.97761	11.1637	10.7604	0.84851	0.992798	0.144288
Glyma.13G137900.1	14.202	3.82946	4.42863	4.61902	4.23082	5.3243	3.97014	7.44246	12.5539	-0.757756	-0.664103	0.0936527							AT3G09730.1
Glyma.19G103700.1	2.02886	6.70155	5.31436	2.30951	2.11541	4.25944	2.97761	0.930307	0.896704	0.853997	-0.693542	-1.54754	PF04937,PF05699	PTHR10775:SF75,PTHR10775	KOG1121			GO:0046983	AT3G17450.1		hAT dimerisation domain-containing protein
Glyma.16G183100.1	3.04329	0.957365	0.885726	8.08328	5.28853	4.25944	2.97761	0.930307	3.58681	1.23419	1.8513	0.617111							AT2G44300.1		Bifunctional inhibitor/lipid-transfer protein/seed storage 2S albumin superfamily protein
Glyma.20G082600.1	4.05771	6.70155	2.65718	11.5475	9.51935	4.25944	9.92536	3.72123	1.79341	0.713966	0.916636	0.20267							AT3G28050.1		nodulin MtN21 /EamA-like transporter family protein
Glyma.14G000100.1	17.2453	6.70155	10.6287	11.5475	9.51935	8.51887	6.94775	5.58184	8.96704	0.460793	-0.224849	-0.685642	PF00497	PTHR18966,PTHR18966:SF7				GO:0005215,GO:0006810	AT4G35290.1	ATGLR3.2,ATGLUR2,GLR3.2,GLUR2	glutamate receptor 2
Glyma.09G206300.1	5.07214	3.82946	6.20008	2.30951	4.23082	6.38915	1.98507	7.44246	3.58681	-0.00943773	-0.224045	-0.214607	PF00005,PF00664	PTHR24221	KOG0055			GO:0005524,GO:0016887,GO:0042626,GO:0006810,GO:0055085,GO:0016021	AT4G25960.1	PGP2	P-glycoprotein 2
Glyma.19G105500.1	1.01443	1.91473	0.885726	1.15475	1.05771	1.06486	1.98507	0.930307	1.79341	-0.522839	-0.219123	0.303716	PF06839				K10569	GO:0008270	AT5G13920.1		GRF zinc finger / Zinc knuckle protein
Glyma.12G181300.1	373.31	210.62	226.746	640.889	766.837	691.094	254.089	256.765	242.11	1.47892	1.37238	-0.106544	PF00076,PF00642	PTHR12620	KOG2202		K12836	GO:0003676,GO:0046872	AT5G42820.1	ATU2AF35B,U2AF35B	Zinc finger C-x8-C-x5-C-x3-H type family protein
Glyma.13G161500.1	10.1443	11.4884	5.31436	15.0118	9.51935	6.38915	5.95522	4.65154	2.69011	1.21747	0.198429	-1.01904	PF03006	PTHR20855,PTHR20855:SF14	KOG0748			GO:0016021	AT5G20270.1	HHP1	heptahelical transmembrane protein1
Glyma.06G220500.1	898.784	672.07	707.695	1322.19	1404.63	1538.72	1104.69	1046.6	1139.71	0.374206	0.904616	0.53041	PF00448,PF04086,PF02881	PTHR11564,PTHR11564:SF8	KOG0781		K13431	GO:0005525,GO:0006614,GO:0003924,GO:0005047,GO:0006184,GO:0006886,GO:0005785	AT4G30600.1		signal recognition particle receptor alpha subunit family protein
Glyma.07G189800.1	318.531	391.562	339.233	147.809	206.253	157.599	257.067	272.58	286.945	-0.674429	-1.0362	-0.361775		PTHR23125:SF17,PTHR23125	KOG1947				AT3G62980.1	TIR1	F-box/RNI-like superfamily protein
Glyma.18G017600.1	303.314	487.299	394.148	342.962	353.274	346.079	328.529	334.911	397.24	-0.0251977	-0.184805	-0.159607	PF00005,PF06472	PTHR11384,PTHR11384:SF4	KOG0060			GO:0005524,GO:0016887,GO:0006810,GO:0016020	AT4G39850.1	ACN2,AtABCD1,CTS,PED3,PXA1	peroxisomal ABC transporter 1
Glyma.02G073700.1	25.3607	36.3799	39.8577	163.975	284.523	193.804	33.7462	32.5608	40.3517	2.59025	2.66038	0.0701253	PF00230	PTHR19139,PTHR19139:SF27	KOG0223		K09872	GO:0005215,GO:0006810,GO:0016020	AT2G37170.1	PIP2;2,PIP2B	plasma membrane intrinsic protein 2
Glyma.16G214900.1	43.6204	43.0814	36.3148	4.61902	9.51935	5.3243	2.97761	1.86061	4.48352	1.06204	-2.66007	-3.72211	PF01582,PF00931	PTHR11017:SF20,PTHR11017	KOG4658			GO:0043531,GO:0005515,GO:0007165	AT5G17680.1		disease resistance protein (TIR-NBS-LRR class), putative
Glyma.08G207500.1	30.4329	11.4884	5.31436	9.23804	22.2118	13.8432	13.8955	23.2577	15.244	-0.210199	-0.0605855	0.149614
Glyma.02G161900.1	258.679	261.361	217.889	339.498	459.044	335.431	399.992	368.402	423.244	-0.0715598	0.619833	0.691393							AT3G56590.1		hydroxyproline-rich glycoprotein family protein
Glyma.10G251200.1	5.07214	1.91473	1.77145	3.46426	2.11541	3.19458	1.98507	1.86061	1.79341	0.637813	0.00262128	-0.635192		PTHR15921					AT4G04885.1	PCFS4	PCF11P-similar protein 4
Glyma.13G371200.1	7.101	3.82946	1.77145	8.08328	6.34623	5.3243	6.94775	2.79092	7.17363	0.224058	0.637085	0.413027	PF00069,PF00560,PF08263	PTHR24420,PTHR24420:SF474	KOG1187			GO:0004672,GO:0005524,GO:0006468,GO:0005515	AT2G24130.1		Leucine-rich receptor-like protein kinase family protein
Glyma.06G133000.1	318.531	319.76	326.833	316.403	452.698	413.165	627.283	609.351	811.517	-0.792767	0.29277	1.08554	PF03169					GO:0055085	AT5G53550.1	ATYSL3,YSL3	YELLOW STRIPE like 3
Glyma.05G220800.1	20.2886	20.1047	22.1432	10.3928	15.8656	19.1675	29.7761	17.6758	24.211	-0.657714	-0.461183	0.196531	PF01416	PTHR11142	KOG2553			GO:0003723,GO:0009982,GO:0001522,GO:0009451	AT5G35400.1		Pseudouridine synthase family protein
Glyma.01G158100.1	10.1443	23.9341	29.229	16.1666	16.9233	13.8432	39.7014	38.1426	33.178	-1.24217	-0.43177	0.810401	PF01535	PTHR24015					AT2G17525.1		Pentatricopeptide repeat (PPR) superfamily protein
Glyma.14G168000.1	21.303	21.062	21.2574	16.1666	15.8656	10.6486	23.8209	13.9546	15.244	-0.312936	-0.575951	-0.263015
Glyma.03G226500.1	207.958	154.136	171.831	169.749	150.194	165.053	206.447	223.274	220.589	-0.423155	-0.138662	0.284493							AT1G73177.1	BNS	bonsai
Glyma.07G062600.1	1182.82	1083.74	1114.24	1329.12	1185.69	1311.91	1101.71	1174.98	1119.09	0.172365	0.178741	0.00637623	PF02453	PTHR10994:SF27,PTHR10994	KOG1792				AT2G46170.1		Reticulon family protein
Glyma.13G051800.1	443.305	540.911	504.864	615.484	684.336	653.823	498.253	388.868	470.769	0.524799	0.391746	-0.133054	PF00201	PTHR11926,PTHR11926:SF15	KOG1192			GO:0016758,GO:0008152	AT1G22360.1	AtUGT85A2,UGT85A2	UDP-glucosyl transferase 85A2
Glyma.08G149700.1	159.265	192.43	181.574	232.106	262.311	219.361	176.671	182.34	238.523	0.256452	0.42061	0.164158	PF03735		KOG4675				AT5G13020.1		Emsy N Terminus (ENT)/ plant Tudor-like domains-containing protein
Glyma.19G246200.1	212.016	236.469	263.061	258.665	228.464	206.583	263.022	287.465	238.523	-0.185707	-0.0366185	0.149088	PF00013	PTHR10288,PTHR10288:SF53	KOG2190			GO:0003723	AT3G04610.1	FLK	RNA-binding KH domain-containing protein
Glyma.01G077100.1	1.01443	0.957365	0.885726	1.15475	1.05771	1.06486	0.992536	0.930307	0.896704	0.217053	0.197753	-0.0193	PF04535	PTHR11615:SF41,PTHR11615					AT5G54980.1		Uncharacterised protein family (UPF0497)
Glyma.19G228000.1	18.2597	18.1899	17.7145	83.1423	65.5777	51.1132	127.045	84.658	93.2572	-0.609822	1.88339	2.49321							AT1G09250.1		basic helix-loop-helix (bHLH) DNA-binding superfamily protein
Glyma.19G155100.1	1.01443	3.82946	2.65718	1.15475	1.05771	1.06486	0.992536	1.86061	1.79341	-0.503646	-1.19458	-0.690933	PF01657						AT3G21900.1		Receptor-like protein kinase-related family protein
Glyma.02G227000.1	127.818	188.601	162.088	153.582	124.809	135.237	202.477	167.455	199.965	-0.462366	-0.210203	0.252163	PF00023,PF00642	PTHR14493:SF3,PTHR14493	KOG1595			GO:0005515,GO:0046872	AT5G58620.1		zinc finger (CCCH-type) family protein
Glyma.04G038200.1	241.434	284.337	282.547	142.035	151.252	243.853	215.38	263.277	258.251	-0.456188	-0.589626	-0.133439	PF04571,PF08235	PTHR12181,PTHR12181:SF4	KOG2116				AT5G42870.1	ATPAH2,PAH2	phosphatidic acid phosphohydrolase 2
Glyma.13G360200.1	1079.35	1111.5	971.641	688.234	786.933	947.725	1064.99	1285.68	1206.07	-0.553827	-0.384333	0.169494	PF04053,PF00400	PTHR19876:SF2,PTHR19876	KOG0276			GO:0005515,GO:0005198,GO:0006886,GO:0016192,GO:0030117	AT1G52360.1		Coatomer, beta\' subunit
Glyma.12G222500.1	38.5483	44.9961	38.0862	77.3686	94.1358	61.7618	37.7164	15.8152	15.244	1.76201	0.93947	-0.822539			KOG1764				AT5G53750.1		CBS domain-containing protein
Glyma.03G228300.1	126.804	218.279	171.831	205.546	236.926	200.194	158.806	121.87	156.923	0.554459	0.314146	-0.240313	PF00266	PTHR11601:SF13,PTHR11601	KOG1549			GO:0008152	AT5G26600.1		Pyridoxal phosphate (PLP)-dependent transferases superfamily protein
Glyma.06G162400.1	9.12986	5.74419	3.5429	4.61902	3.17312	1.06486	3.97014	3.72123	1.79341	-0.098797	-1.05615	-0.957348							AT3G59880.1
Glyma.02G277900.1	2.02886	1.91473	10.6287	1.15475	1.05771	1.06486	3.97014	3.72123	1.79341	-1.5331	-2.15264	-0.619542	PF00682	PTHR10277,PTHR10277:SF1	KOG2368			GO:0003824	AT2G26800.1		Aldolase superfamily protein
Glyma.14G139400.1	5.07214	4.78682	12.4002	2.30951	1.05771	1.06486	5.95522	2.79092	3.58681	-1.47646	-2.32834	-0.851879	PF04654						AT4G31330.1		Protein of unknown function, DUF599
Glyma.19G218300.1	12.1731	16.2752	20.3717	15.0118	30.6735	15.9729	0.992536	1.86061	2.69011	3.47548	0.336818	-3.13867	PF00501	PTHR24096	KOG1256	6.2.1.3	K01897	GO:0003824,GO:0008152	AT2G47240.1	CER8,LACS1	AMP-dependent synthetase and ligase family protein
Glyma.01G002700.1	159.265	79.4613	90.3441	41.5712	34.9043	17.0377	120.097	106.985	78.9099	-1.71025	-1.81516	-0.104903	PF00085	PTHR10438:SF7,PTHR10438	KOG0907			GO:0045454	AT4G29670.1	ACHT2	atypical CYS HIS rich thioredoxin 2
Glyma.17G021500.1	98.3996	66.0582	86.8012	91.2256	72.9817	69.2158	64.5148	87.4489	78.9099	0.0158442	-0.106227	-0.122071							AT5G18850.1
Glyma.09G023300.1	94.3419	171.368	129.316	137.416	217.887	214.037	157.813	143.267	222.383	0.121202	0.527342	0.40614	PF00078,PF01348					GO:0003723,GO:0003964,GO:0006278,GO:0006397	AT5G46920.1		Intron maturase, type II family protein
Glyma.14G221600.1	203.9	291.039	249.775	158.201	221.06	205.518	213.395	251.183	224.176	-0.236096	-0.348793	-0.112697	PF08375,PF01399	PTHR10758:SF2,PTHR10758	KOG2581			GO:0005515,GO:0030234,GO:0042176,GO:0000502	AT1G20200.1	EMB2719,HAP15	PAM domain (PCI/PINT associated module) protein
Glyma.15G164100.1	26.3751	20.1047	21.2574	28.8689	40.1928	34.0755	27.791	26.0486	31.3846	0.275229	0.606544	0.331315	PF04782,PF04783	PTHR21450					AT4G30130.1		Protein of unknown function (DUF630 and DUF632)
Glyma.11G189000.1	225.203	219.237	221.432	30.0236	51.8276	100.097	83.373	97.6823	94.1539	-0.597003	-1.87172	-1.27471	PF00860	PTHR11119,PTHR11119:SF8	KOG1292			GO:0005215,GO:0006810,GO:0055085,GO:0016020	AT2G27810.1	ATNAT12,NAT12	nucleobase-ascorbate transporter 12
Glyma.15G028000.1	56.808	78.5039	88.5726	71.5948	42.3082	68.151	15.8806	28.8395	30.4879	1.27541	-0.298388	-1.5738	PF00566	PTHR22957:SF131,PTHR22957	KOG2197			GO:0005097,GO:0032313	AT2G43490.4		Ypt/Rab-GAP domain of gyp1p superfamily protein
Glyma.15G106900.1	3679.33	4880.65	5283.36	6093.64	5934.79	5165.63	5226.69	3873.8	5269.03	0.258898	0.312719	0.0538209	PF00076	PTHR24012:SF67,PTHR24012	KOG0148			GO:0003676	AT1G11650.2	ATRBP45B,RBP45B	RNA-binding (RRM/RBD/RNP motifs) family protein
Glyma.09G182600.1	174.482	218.279	219.66	205.546	222.118	220.426	242.179	249.322	336.264	-0.353026	0.0816713	0.434698	PF05495,PF01814	PTHR21319	KOG1940			GO:0008270,GO:0005515	AT3G18290.1	BTS,EMB2454	zinc finger protein-related
Glyma.03G181700.1	2.02886	1.91473	3.5429	3.46426	1.05771	6.38915	3.97014	2.79092	2.69011	0.207234	0.543438	0.336204	PF00221	PTHR10362:SF3,PTHR10362	KOG0222	4.3.1.24	K10775	GO:0016841,GO:0009058	AT2G37040.1	ATPAL1,PAL1	PHE ammonia lyase 1
Glyma.17G166800.1	83.1832	113.926	79.7153	73.9043	58.1738	88.3833	47.6417	39.0729	48.422	0.706107	-0.328448	-1.03455	PF00702,PF00122	PTHR24093,PTHR24093:SF175	KOG0207			GO:0000166,GO:0046872	AT4G37270.1	ATHMA1,HMA1	heavy metal atpase 1
Glyma.09G087900.1	203.9	221.151	165.631	384.533	440.006	428.073	348.38	325.608	345.231	0.297476	1.08449	0.787009	PF04050,PF02854	PTHR12839	KOG2051		K14327	GO:0003677,GO:0003723,GO:0005515	AT2G39260.1		binding;RNA binding
Glyma.04G200400.1	1677.87	3051.12	2565.06	3839.56	3764.37	4222.17	3198.94	2495.08	3401.2	0.378793	0.697183	0.318389	PF02861,PF02151,PF00004,PF07724,PF10431	PTHR11638:SF19,PTHR11638	KOG1051		K03696	GO:0005524,GO:0008134,GO:0006355,GO:0005515,GO:0019538,GO:0016887	AT5G50920.1	ATHSP93-V,CLPC,CLPC1,DCA1,HSP93-V	CLPC homologue 1
Glyma.01G163300.1	47.6782	51.6977	46.0578	12.7023	11.6348	28.7512	34.7388	42.7941	24.211	-0.938477	-1.4539	-0.515418	PF05383	PTHR22792:SF23,PTHR22792	KOG2590				AT4G35890.1		winged-helix DNA-binding transcription factor family protein
Glyma.14G186500.1	27.3896	12.4457	11.5144	5.77377	10.5771	12.7783	20.8433	13.9546	8.96704	-0.587311	-0.817894	-0.230583						GO:0046872,GO:0005515,GO:0008270	AT2G40770.1		zinc ion binding;DNA binding;helicases;ATP binding;nucleic acid binding
Glyma.11G038100.1	6.08657	9.57365	6.20008	6.92853	5.28853	14.908	4.96268	2.79092	2.69011	1.37699	0.311314	-1.06568
Glyma.06G290200.1	8.11543	7.65892	7.08581	13.8571	9.51935	8.51887	0.992536	0.930307	4.48352	2.31577	0.480508	-1.83526	PF00481	PTHR13832:SF144,PTHR13832	KOG0698			GO:0003824	AT4G28400.1		Protein phosphatase 2C family protein
[truncated: 37,291 more rows]

## Sheet: Table S3
Table S3. Summary of the reference gene set
Version	Genome		Transcripts		Expressed transcripts
[truncated: 2 more rows]

## Sheet: Table S4
Table S4. Information regarding the GO terms in C1
[truncated: 57 more rows]

[truncated: 8 more sheets: Table S5, Table S6, Table S7, Table S8, Table S9, Table S10, Table S11, Table S12]
